# Supplementary material for: Palmitic Acid, A Critical Metabolite, Aggravates Cellular Senescence Through Reactive Oxygen Species Generation in Kawasaki Disease
Source: Front Pharmacol. 2022 Mar 23;13:809157. doi: 10.3389/fphar.2022.809157 (PMC8983937; doi:10.3389/fphar.2022.809157)
Supplement: Supplementary file 1 [file Table2.XLSX]

## Sheet: Sheet1
id	model	MS2 name	MS2 score	MS1 name	MS1 ppm	type	mzmed	rtmed	QC01	QC02	QC03	QC04	QC05	QC06	QC07	QC08	QC09	QC10	QC11	CAL1	CAL2	CAL3	CAL4	CAL5	CAL6	CAL7	CAL8	CAL9	CAL10	CAL11	CAL12	CAL13	CAL14	CAL15	CAL16	CAL17	CAL18	CAL19	CAL20	CAL21	CAL22	CAL23	CAL24	CAL25	CAL26	CAL27	CAL28	CAL29	CAL30
246	negative	L-Phenylalanine	0.9951	NA	NA	MS2 forward	164.072	252.118	220251	228749	233471	223430	229557	227780	221899	218308	231864	220175	226890	257107	215145	197102	266528	192131	332050	302187	219396	218974	160170	173398	234871	169948	275810	187813	190383	256120	402703	167153	258543	218680	160062	225907	238034	242198	173478	271759	210427	162164	196994
539	negative	Indoxyl sulfate	0.9595	NA	NA	MS2 forward	212.002	30.4515	686654	728596	736003	721591	724320	745850	705182	722076	726346	707047	678459	944668	319955	530481	82762.6	191038	1515576	13182.3	1107558	2410553	17422.6	589479	942237	47437.4	578043	23477.5	608626	13340.9	13191.7	872996	222882	172665	574864	797968	83462.1	1186124	2333305	192324	11481	200898	916916
1059	negative	NA	NA	NA	NA	Unmapped	275.999	30.719	375780	400117	392265	404586	387805	389360	381955	377276	387628	372650	370800	107243	1935.38	726950	71345.6	196239	3072.61	218414	146095	246213	474551	16145.6	1559134	2094.97	553920	39186	27029.2	726486	714570	324400	699333	161092	1880.26	169907	414659	1432004	4357.53	2868.05	323695	343427	201891
2153	negative	NA	NA	dIDP;GF 109203X;Bisindolylmaleimide I	-1.21304312500536;-9.4616583279799	MS1 mz matched	411.181	32.0825	424648	433725	439006	420164	436191	421980	418102	408985	418165	402987	397731	138370	10984	50119.5	2168558	262209	226623	307878	26063.8	95501.9	632470	15109.1	57161.9	521039	349602	59509.3	431846	4436616	323180	16795.5	323199	56283.7	908067	68860.1	43555.4	44611.6	71120.9	38646.7	2058049	124398	1928888
684	negative	NA	NA	N-Phosphohypotaurocyamine;N(omega)-Phosphohypotaurocyamine	19.3089	MS1 mz matched	230.012	32.5995	2125941	2398573	2468708	2288243	2304832	2299841	2310246	2341284	2342793	2257146	2270837	7006393	1186.2	1789338	1439479	105520	12711.7	4669272	517920	1097655	5958332	7125.84	3380076	4007.99	3923627	56639.5	27689.9	2649746	6359276	156637	51150.4	71713.8	10198.6	26861.1	2091448	3502678	7419.14	3035.43	2023169	3413409	1001688
454	negative	p-CHLOROPHENYLALANINE	0.9191	NA	NA	MS2 forward	198.034	234.733	1479786	1518280	1553959	1551459	1520212	1605013	1519101	1455811	1593288	1526061	1659183	1555930	1603679	1597899	1649784	1767863	1563806	1519526	1717807	1412891	1557183	1480756	1462324	1724021	1661277	1518566	1582052	1419780	1676937	1567009	1549388	1569935	1455427	1567020	1668337	1570815	1651200	1637199	1598659	1507836	1614634
1828	negative	NA	NA	Cytidine 2',3'-cyclic phosphate;3',5'-Cyclic CMP;Cytidine 3',5'-cyclic monophosphate;2',3'-Cyclic CMP	-14.0515405374705;-14.0964518575047;-14.0964518575047	MS1 mz matched	364.042	294.485	27078.2	27032	27514	28981.7	28186.2	26084.5	27067.2	29267.8	26269.8	26450.8	27950.2	28086.3	30863.2	31873.4	37806.7	30965	22303.9	21938.1	21543.7	12778.6	31520	21173.5	15554.6	24735.9	23334.6	22639.8	27991.3	32057.5	38394.5	20589.3	19830.2	31171.2	20308.4	18375.8	28255.6	21932.2	43641.9	42445.8	37660	20735.2	25914.9
633	negative	D-Quinovose	0.9771	NA	NA	MS2 forward	223.082	206.577	117902	112987	119345	113832	117194	114575	109440	112207	117223	120746	105870	97099.7	51210.3	157347	85636.6	84792.9	118070	30682.5	89882	57834.8	87849.9	153639	185046	56643.7	52584.5	55650	76515.1	212848	28504.9	106199	46352	99050.2	263447	145736	82739.7	99424.5	285834	128231	133967	53211	168438
819	negative	NA	NA	N-Phosphotaurocyamine;Taurocyamine phosphate;N(omega)-Phosphotaurocyamine	16.5601	MS1 mz matched	246.007	32.0025	238634	257216	263435	255052	243971	238357	255313	257633	246873	248154	232612	598941	4693.21	317971	202515	14500.6	5952.92	553868	54112.4	156581	1037824	3221.33	496352	5212.71	677451	10735.2	9166.02	417092	1182057	37538.8	10231.2	5624.2	16918.7	5702.94	387279	286524	20776.7	3711.62	124175	316402	60353.6
235	negative	3-Hydorxy-3-methylglutaric acid	0.8124	NA	NA	MS2 reverse	161.046	301.068	50398.4	49520.9	50063	53498.5	48886.1	47075.3	48102.6	48571.3	50856.9	46232.3	48878.8	67106.3	21573	53862	55805	36270.1	51207.4	40760.5	34915.7	62996.5	54405.4	45260.6	21520.9	67534.2	25533.6	44084.8	82000.1	75383.1	25397.3	45679.5	8598.23	59297.9	75584.1	23669.5	82584.9	52531.3	63673.2	83257.1	104741	46636	32554.8
291	negative	NA	NA	Phenolic phosphate;Phenylphosphate	7.22322	MS1 mz matched	173.01	431.709	8092.98	8341.62	8626.99	7890.87	8452.01	8243.13	7932.98	8129.53	7789.62	7563.67	8462.23	7397.97	6149.91	7177.24	7803.95	7253.13	7944.91	7386.67	7581.47	6560.59	9311.72	8572.22	4680.35	9046.41	8469.05	6546.1	12240	9860.96	9618.46	7297.25	12444.3	8737.24	9064.16	6266.48	11029.3	5869.74	5491.06	10685	10329.4	8323.7	12629.4
3461	negative	NA	NA	C-Toxiferine I;Toxiferine I	-13.7084	MS1 mz matched	613.354	289.865	9297.39	9918.4	9965.44	9484.85	9734.63	9374.38	9847.45	9895.2	8889.38	9765.83	10430.5	15698.2	5025.62	9888.57	14604.7	10290.1	12194.1	6492.4	6397.81	9118.61	10222.7	6594.73	5748.88	8461.61	12409	9517.41	5059.68	11526.8	24174	4962.38	7741.46	4960.53	5164.87	9929.87	8498.39	8307.05	2377.4	2526.99	19687.9	17607	9462.66
2362	negative	NA	NA	Austalide J;Mitoxantrone	-8.56207395807183;22.737459559453	MS1 mz matched	443.207	33.119	41643.9	41535.2	41951.7	41630.8	41977.5	40702.6	39142.7	38465.9	44203.2	41994.9	37829.1	15030.1	12261.2	21844.7	30450.3	34781.9	34214.5	78382.7	33944.6	33362	43952.6	68772.9	30572.7	53511.5	50381.8	51716	66139.5	22996.8	18655.7	24534.3	126747	34020.1	172769	15268.1	33004.2	27479.7	18819.5	32959.1	44379.4	37108.8	53482.3
2176	negative	NA	NA	4-O-Methylmelleolide;Clausarinol;Eplerenone;Armillarin;Armillaripin;Magnoshinin;Eplerenone;Estra-1,3,5(10)-triene-3,6alpha,17beta-triol triacetate;Estra-1,3,5(10)-triene-3,6beta,17beta-triol triacetate	-2.990553655202;-2.990553655202;-2.990553655202;-2.990553655202;-2.990553655202;-2.89712175791514;-2.89712175791514;-2.89712175791514;-2.89712175791514	MS1 mz matched	413.197	35.073	707467	752280	746411	718601	706094	698032	696257	709081	720676	674732	631269	1076331	10259.2	154064	4539530	527750	946330	690593	133076	229494	1036189	41713.3	189534	1076797	955474	105991	1354203	5053372	479149	36132	720310	228523	1196206	362802	383288	222978	276467	93674.9	636710	420275	1450374
2971	negative	NA	NA	Glycochenodeoxycholate-3-sulfate;N-[(3a,5b,7b)-7-hydroxy-24-oxo-3-(sulfooxy)cholan-24-yl]-Glycine;N-[(3a,5b,7a)-3-hydroxy-24-oxo-7-(sulfooxy)cholan-24-yl]-Glycine;Glycochenodeoxycholate 7-sulfate	-7.44042364167794;-7.44042364167794;-7.44042364167794;-7.36862729451121	MS1 mz matched	528.259	225.335	84903.4	87430.8	94582.5	96011.1	93918.4	89584.5	98247.8	98048.5	92110.8	96789.3	95585.1	311191	6938.33	40934.6	29447.8	44254	84265.7	7835.4	33561.6	36790.3	10903.2	56880.9	20018.4	7261.39	339238	20550.1	14049.2	22302.1	26414	8244.45	16928.8	15650.1	11407.8	31120.7	12710	33464	6865.63	31323.1	14795.4	810465	31949.1
100	negative	L-Pipecolic acid	0.9368	NA	NA	MS2 forward	128.073	268.744	8391.78	8042.24	8665.41	7511.1	7962.04	8447.41	8495.12	8085.99	7700.72	7616.1	7724.82	7693.48	13088.2	26630.1	990.565	19069.6	3542.95	1301.47	12892.2	8508.64	2978.55	30987.7	12425.5	1590.93	8640.42	2366.7	6084.31	1024.38	4151.12	9865.41	5733.79	5601.69	2246.8	7577.17	10688.4	26768.6	9294.91	9210.68	887.386	15044.3	1712.48
1001	negative	NA	NA	Sulfamethizole;Sulfamethizole	-9.00399721856373;-8.94104053520363	MS1 mz matched	269.022	46.9105	36643.6	36767.6	41293.6	35509.8	39037.9	36102.4	39130.9	38284.2	36524.1	35830.7	35577.5	26654.6	26400.4	17519.7	28438.3	20355.5	14786	23925.7	1093066	10390.8	25626.3	13856.4	16079.3	30213.6	1920.59	23788.1	32746.7	18806.2	64617.8	18934.5	18558.6	21689.7	20617.9	150368	22245.3	21664.4	10211.8	10956.5	35223.2	58375.7	16130.3
177	negative	trans-cinnamate	0.6489	NA	NA	MS2 reverse	147.046	252.118	12622.1	13319	14065.5	13249.3	14291.6	14324.3	13879.4	12416.8	13097.2	12786.6	13688.7	16487.9	13956.4	11630	15002.8	11433.7	19633.9	16874.3	13461.8	13385.4	9232.15	10147.7	13227.5	9576.38	16444.3	10346.5	11816.2	15814.4	22126.5	10405.7	15629.1	12998	8603.42	13375.5	13354.9	14199.4	10292.2	13540.1	12812	9782.71	12465
334	negative	NA	NA	NA	NA	Unmapped	181.006	234.731	58680.7	55757.2	63915.7	59921.2	62659.2	64474.8	58472.8	59199.8	60467	60874.6	66161.1	60274	66489.8	59947.8	68585.4	73852.6	61259.2	67130.4	68261.1	52835.2	59373.3	58514.3	55137.2	65993.7	64827.2	59585.8	67768.4	59588.3	65007	66216.2	63672.1	65800.8	60604	63344	68703.5	64115.6	65868.1	62484.1	63480.9	61028.6	69300.8
249	negative	Dihydrothymine	0.9999	NA	NA	MS2 reverse	165.006	155.42	88900.2	97344.8	98051.1	98261.6	101262	98920.2	96362.6	95989.1	100022	85102.7	97510.2	82896.8	114901	97250.2	115768	103794	87738.7	76836.9	78665.8	54642.8	113307	108603	88938.9	79270.6	102427	91518.4	92289.3	102854	145497	80847.4	93946.2	115316	60606.8	86402.4	71685.9	80650.7	143228	109874	91219.4	33447.7	99012.3
194	negative	Adenine	0.6042	NA	NA	MS2 reverse	151.071	367.367	9174.96	8015.15	7745.24	8287.59	8175.22	8038.36	8243.84	8179.08	7738.33	8196.87	8743.92	6924.28	11882.6	6964.06	8035.53	6575.65	8128.06	11025	12085.5	7876.03	9856.85	14563.4	8400.56	10417.4	4704.69	9748.39	11922	9738.15	6020.75	9114.95	12007.4	10059.3	8766.41	9507.4	9407.3	7728.1	11931.6	11346.4	8447.29	6306.88	10987
61	negative	L-Valine	0.9965	NA	NA	MS2 forward	116.073	296.302	62864	66472.9	71925.5	67156.7	70986.4	68861.3	70180.4	70437.8	61999.7	65625.8	64193.4	69285.9	99154	69803.4	41294.9	55814.4	56658	63773.3	79077.1	47005.3	54238.4	60178.1	81341.2	49691.3	66679.4	76680.2	55461.9	46624.3	52461.6	53039.5	79506.9	73384.2	52356.3	73909.2	90528.3	81014	97012.4	110412	32714.2	48189.1	57561
2203	negative	NA	NA	NA	NA	Unmapped	419.051	234.736	19069.8	19015.7	20387	20781.8	20334.2	21533.9	20974.3	19606.1	19350.8	17900.2	20569.1	23105.4	26551.4	25287.3	26154.4	27268.9	21459.6	22242.5	26808.5	20315.3	19985.2	21112.1	22462	27763.4	22642.3	20832.1	23262.7	20675.6	24911.4	23798.2	22102.5	24921.4	23239.7	23846.8	29573.6	24737.5	29418.5	23616.7	24877.1	18594.8	25505.7
466	negative	NA	NA	1-(Methylthio)-1-hexanethiol;Butyl propyl disulfide;Butyl isopropyl disulfide;L-Rhamnose;6-Deoxy-L-mannose;L-Mannomethylose;L-Rhamnopyranose;2-Deoxy-D-glucose;2-Deoxy-D-arabino-hexose;D-arabino-2-Deoxyhexose;L-Rhamnulose;6-Deoxy-L-fructose;6-Deoxy-D-galactose;D-Fucose;6-Deoxy-L-galactose;L-Fucose;D-Rhamnose;6-Deoxy-D-mannose;D-Mannomethylose;L-Fuculose;6-Deoxy-L-tagatose;beta-D-Fucose;beta-L-Rham…	-2.08387500104639;-2.08387500104639;-2.08387500104639;3.04750759584062;3.04750759584062;3.04750759584062;3.04750759584062;3.04750759584062;3.04750759584062;3.04750759584062;3.04750759584062;3.04750759584062;3.04750759584062;3.04750759584062;3.047507595840	MS1 mz matched	199.038	206.391	65057	66946.4	75331	77398.6	73056.8	73808.2	71568.2	75644.5	74612.8	75327.2	69616.5	66258.4	36333.2	89069.2	55039.1	53373.4	70616.4	21443.6	57225.3	39246.7	57440.3	90300.3	104162	36903.8	35641.3	33166.8	50681.2	130590	20839.7	63727.1	33206.4	61153.8	141072	84663.3	52982.8	60920	162048	79127.8	78822.3	23498.6	100714
105	negative	Ketoleucine	0.984	NA	NA	MS2 reverse	129.057	73.5795	1108264	1079979	958615	1095272	1038056	1065643	1045095	1027331	961014	969532	976617	1227397	680284	1497381	773010	690799	1002829	876556	1154744	821012	615359	687500	896046	768894	876670	1205510	1028197	836959	737899	927475	724882	1065580	1248897	1107153	1732002	1228600	1164734	1595307	683009	742021	618806
52	negative	D-Proline	0.9987	NA	NA	MS2 forward	114.058	307.627	47139.2	51783.1	50337.2	47800.4	49191.9	46590	45623.4	50526.7	45117.3	46890.9	43245.4	32884.2	81483.4	39786.4	23282	25463.5	49179	51455.9	47917.7	40828.2	40755.9	60374.7	42161.5	63688.6	34653.7	59776.9	41755.5	48102.4	25851.7	38224.5	73194.5	41170.6	63738.3	43450.2	56175.6	43629.3	74494.1	63341.7	36014.5	20678.3	49083.1
797	negative	Pseudouridine	0.9933	NA	NA	MS2 forward	243.061	240.73	48122.6	51188.8	53909.9	56185.7	51715.6	58295	51791.6	53059.5	56611.2	53108.6	51535.8	44914.2	55116.5	41421.4	60139.4	50350.8	53084.8	52516.8	35178.9	40927.6	67487.5	39996.5	35455.9	49981.6	47826.3	51007.6	57337.2	57137.3	79920.7	40648.8	48626.1	38009.1	41016.5	48773.8	49898.6	36084.6	41455.9	37419.6	68178.4	37979.8	54576.7
986	negative	Inosine	0.9993	NA	NA	MS2 forward	267.072	216.631	14792.2	15006.5	15972.9	16553.6	14885.5	15559.2	15445.7	13974.3	14238.9	13867.3	14668.9	8996.41	20692.2	35594.7	30372.9	14542.6	4127.75	43514.5	36537.1	5315.54	5982.44	29921.5	18301.9	7263.16	3149.06	4310.69	18899.8	27541.7	31571.9	12365.3	6733.87	10525.6	33176.1	2976.62	4665.63	13542	10394.4	5221.14	5673.94	6276.13	6566.18
324	negative	Alpha-D-Glucose	0.9868	NA	NA	MS2 forward	179.057	300.577	721207	687716	723316	703663	656269	637666	632448	643711	660364	612008	652500	870035	293453	767014	742439	479016	718556	560241	462023	838388	669302	630785	312957	833421	318867	650031	1023708	915170	365029	584227	117585	770216	1040448	332274	1054298	661754	746557	1033259	1282410	596740	460546
1878	negative	NA	NA	NA	NA	Unmapped	370.007	349.614	63812.6	64665.4	66124.5	64995.5	64149.9	65799	65553.4	60226.2	60276.7	54454.2	61316.4	65431.7	64249.6	62875.5	57142.1	67029.6	58744.3	69251	58059.9	80209.5	58572.2	74593.9	71396.1	63977.5	63305.5	74668.1	65715.6	69279.9	66045.3	58630.2	68592.4	62550.2	73632.8	71388.3	64680.2	63935	64844.5	61620.6	69125.5	55688.8	63270.9
154	negative	2-Oxoadipic acid	0.9515	NA	NA	MS2 forward	141.019	349.215	2681676	2735681	2692112	2703703	2471139	2495637	2618153	2401946	2411072	2396581	2379356	2493707	2735220	2589238	2546442	2498342	2840078	2643802	2457081	2830079	2489313	2683147	2686964	2469719	2460770	2863022	2623468	2832770	2561041	2537574	2789978	2545008	2690657	2769873	2718708	2559253	2488003	2314862	2519621	2302431	2464472
2071	negative	NA	NA	Sunitinib;Desacetoxyvindoline;16-Methoxy-2,3-dihydro-3-hydroxy-N-methyltabersonine;Deacetoxyvindoline;Mitragynine	-2.01977940202971;-24.1072410618075;-24.1072410618075	MS1 mz matched	397.203	31.1965	1220092	1273311	1360169	1275817	1283968	1187325	1146224	1111470	1270186	1245217	1268538	2495688	29278.9	236470	7750309	2093430	1140336	1471570	163184	525234	2479402	134703	481909	1671347	2250391	229103	2010035	3519795	2682471	93071.2	1435535	328474	1473224	519292	637730	361344	699074	262155	1265293	1053824	1879607
1962	negative	NA	NA	Kanzonol N;O-Ethylcubebin;Glicoisoflavanone;5,7-Dihydroxy-3',4'-dimethoxy-5'-prenylflavanone;12-Dehydroporson;Schizandrin C;Wuweizisu C	-17.2192489847507;-17.2192489847507;-17.2192489847507;-17.2192489847507;-17.2192489847507;-17.2491841233162	MS1 mz matched	383.151	34.404	758738	778809	736601	681276	727958	766056	727372	655024	669317	701015	699568	85571.1	5171.41	34384.7	1360889	76911.4	247824	2872847	143340	268488	1397909	53702.6	17789.5	1499142	225190	968204	1256526	3715272	340754	14426	573407	70369.6	1587673	232178	77861.2	20534.5	360180	49492.8	2343998	62415.1	1997499
3148	negative	NA	NA	NA	NA	Unmapped	555.331	32.047	35826	36888.4	37351.3	37208.1	37170.7	39083.2	33173.1	36121.7	35462	32182.5	38325.1	27898.5	13211.4	21227.9	23750.3	47860.1	139802	34539.7	27280.1	64654.9	26474.1	58182.6	16003.1	56394.5	69339.1	187098	37258.2	48446.1	36156.8	14602.3	24303.1	16443.7	32790.5	21977.6	19505.7	25697.6	9588.15	11527.2	21193.2	38784.2	24931.5
343	negative	NA	NA	3-Chloro-D-alanine;3-Chloro-L-alanine	18.697864459921;18.697864459921	MS1 mz matched	182.032	284.104	100463	110285	115403	112981	111624	118981	121022	118502	122706	123202	118313	106969	129488	125296	143646	152274	102949	112072	100443	59826	132697	131453	105161	91142.6	134967	104321	96580	127089	211462	108724	108854	145319	70589.3	97017.1	87150	107578	167786	146162	112394	90928.6	130217
162	negative	D-Threitol	0.8156	NA	NA	MS2 forward	143.036	300.864	16831.1	17339.5	16386.5	16133.4	15367.2	16181.9	14454.9	15504.2	16697	15475.3	17644.4	21346.4	7596.24	18189.6	18951.4	12442.3	16717.2	13743.9	12225.8	19171.4	17941.5	15167.7	8704.67	22048.8	7636.26	15975.8	27451.7	22738.5	9010.61	13142.8	4174.86	19062.2	23898.7	9333.42	24597.9	17107.7	17597.5	25337.9	33432	14368.6	12044.1
1678	negative	NA	NA	Olsalazine;	6.6172797025187;	MS1 mz matched	339.197	27.888	77102.7	82061.1	86399.2	78594.6	82972.9	81238.1	81808.1	86209.4	81828.1	86455.8	70317.7	12206.1	131034	81168.1	69788.8	123920	69263.8	155469	117983	89074.6	126162	118253	115946	165204	72989.7	92316.4	120245	62783.1	63813.6	173268	92080.8	106774	67510.3	82496.3	57776.3	161303	63613.8	85227	45083	82992.9	197509
760	negative	NA	NA	11H-Benz[bc]aceanthrylene;4H-Cyclopenta[def]chrysene	-9.50253213422312;-9.50253213422312	MS1 mz matched	239.092	211.956	63369.1	69890.9	73431.6	67831	77179.7	71821.9	71712.9	75479.6	71338.3	78417.6	73782.4	92315.4	13119.6	378510	31265.8	50061.5	7183.81	2107.62	16279	64648.7	54899.6	69461.6	12584.2	24808	69008.9	43111.3	3979.37	71929.9	43505.8	150618	14593.2	271264	79963.7	97409.4	22895	17792.9	89251.2	73941.6	237282	131571	181403
2254	negative	NA	NA	Austalide L;	-17.7387837386236;	MS1 mz matched	427.212	28.636	102454	109373	108206	93519.4	106334	98723.9	104506	105151	107031	102550	89935.2	58305.6	16581	93188.1	167938	165319	135072	88015.4	85694.4	130491	26836.7	307108	208460	67345.3	144982	125984	55916.4	541120	43189.4	193701	227381	183695	70340	93691	147571	195977	91103	111765	227940	107135	246575
181	negative	L-Methionine	0.8835	NA	NA	MS2 forward	148.044	279.596	7569.06	7789.74	7799.94	9130.82	8609.79	8312.83	8294.92	8719.99	8737.46	7754.84	8267.48	5606.02	12261.8	8162.94	3434.68	7309.89	7793.12	11341.2	8774.88	6436.26	5116.92	8796.89	8257.2	7992.18	6911.26	10293.9	7166.24	5859.75	5125.64	6318.55	15074.8	6206.29	8523.89	9560.94	7376.21	7511.62	13336	11057	4127.68	3645.6	12742
2613	negative	NA	NA	NA	NA	Unmapped	481.04	48.106	60046.2	57723.7	56044.8	49219.9	56188.2	59020.8	55569.7	55075.7	50128.3	55922.5	53302	957.433	1279.04	7481.69	36086.8	183341	1262.11	22817.6	8241.65	16300.1	741.217	1708.95	12945.8	161.878	109703	202.852	1669.66	0	8426.94	228835	63784.3	335.546	516.535	483.046	497.026	848.388	0	1398.17	1893.32	2167992	81.97
941	negative	NA	NA	NA	NA	Unmapped	260.022	33.804	411213	479688	470753	436496	426947	451178	438762	448336	427848	427224	384315	1016941	3972.15	314935	218858	2850.86	29484.7	657309	109397	308571	706320	9540.13	588494	8724.75	941716	8835.67	12355.2	977991	719598	31909.4	16366	13304.8	6938.67	31338.5	535591	646515	14445.5	15468.8	403745	474161	120369
486	negative	NA	NA	Penmacric acid;ANTU;alpha-phthylthiourea	-8.25946993808427;3.97166139169897	MS1 mz matched	201.057	230.208	101330	102094	106997	114077	103132	117801	115406	118302	115924	117970	116036	208764	4879.93	57674.8	159045	225119	19791.7	6819.72	81144.9	7377.11	106905	99971.7	10389.8	70813.4	164554	11407.3	23587.7	21457.3	217668	19024	184317	10187.5	40061.1	44225.8	39400.7	67992	9578.84	44046.3	9484.86	139196	181741
3977	negative	NA	NA	SM(d18:0/16:1(9Z));	-7.9348950904312;	MS1 mz matched	737.531	175.146	606522	661348	693892	699682	662956	652573	639344	692505	568089	627495	672892	737110	714731	861687	804459	711312	717654	563258	703103	743545	681234	832165	609036	676482	746632	649588	717082	746612	638116	760533	630795	632036	965054	827046	639916	891594	740302	616299	599818	677471	785800
1560	negative	NA	NA	Robecoxib	-7.27602	MS1 mz matched	326.086	301.183	32347.5	34383.8	35701.3	36228.2	29538.8	30904	33330.9	35666.7	34948.6	33391.5	33655.3	81995.9	4258.76	22525.2	14032.1	3563.37	5707.32	97340.3	6246.24	24962.6	78886.1	1923.71	39540.9	8986.64	29605	6715.38	3087.7	78972.8	104234	3407.11	3731.36	6858.54	7390.07	3762.11	69608.6	94575.4	6723.75	9997.7	113912	146445	12523
578	negative	3-Hydroxydodecanoic acid	0.9931	NA	NA	MS2 reverse	215.164	104.915	9953.89	10607.4	9813.05	10478.5	9725.2	9888.95	10387.5	10105.9	8967.04	9148.53	11096.7	11052.5	6280.32	4540.93	15400.8	16963.6	6450.59	5021.6	9173.88	3871.16	6468.66	16567	4129.65	5949.34	8554.34	9720.76	10621.9	11494.4	25899.9	8480.25	14421.5	5300.2	16859.1	8693.56	8242.77	8521.43	20529	10183.8	3653.21	8283.14	31818.5
1555	negative	NA	NA	Acitretin;Isoacitretin;AA861;Docebenone;Moxestrol;11beta-Methoxy-17alpha-ethinylestradiol;17alpha-Ethinyl-11beta-methoxy-1,3,5(10)-estratrien-3,17-diol;Preg-4,16-diene-3,11,20-trione	-18.7161893017182;-18.7161893017182;-18.7324372861707;-18.7324372861707;-18.7324372861707	MS1 mz matched	325.182	28.367	125740	135973	126367	127115	119975	119191	121873	128521	116270	113278	108819	91008.8	187785	121974	105729	162989	107197	233300	178732	129323	183814	174964	160315	216826	97445.3	126317	169679	108436	85591	227902	126295	168482	113990	124744	110138	239350	87887.7	121814	78142.3	119784	239397
242	negative	Dulcitol	0.7285	NA	NA	MS2 reverse	163.061	206.228	29705.1	27842.3	28801.6	30004.3	31837.2	29889.5	27501.5	26974.2	32747.8	31631.4	28654.8	33172.7	11640.8	37106.4	24200.4	27787.4	31234.4	7512.24	22150.2	13866.6	22802	33008.3	39629.6	13498.1	12974.1	12216.2	22108.2	45848	8406.53	23200.3	12253.9	22759.4	59575.5	31154.5	18025.3	23005.4	61903.1	33107	28105.1	17440.5	41332.8
2140	negative	NA	NA	Nigakihemiacetal A;Coleonol;Colforsin;Forskolin	4.99865319623534;4.99865319623534	MS1 mz matched	409.233	248.215	8822.71	10131.2	11089.8	11397.1	10289.4	10755.1	10729.4	10395.8	10042.9	10532.5	10072.6	11424.1	19732.2	4707.66	12040.9	6323.09	13742.8	9497.86	7676.65	8700.97	9916.92	14822.7	18332.6	7824.84	27887.8	9665.81	4711.53	6974.67	11210.9	6632.72	24507.1	7625.19	9329.83	30917.2	4510.59	7587.86	8143.13	18666.2	10606.2	18171.3	18952.9
2889	negative	NA	NA	NA	NA	Unmapped	515.3	52.011	51414.7	45257.6	50640.6	47669.8	43351.2	49400.4	43458.3	51904.3	47847	51438.3	49904.1	37435.4	24637	15509.8	213901	91845.1	27259.3	20441.8	11121.8	23660.9	68132.5	24857.5	5564	22662.1	63120.8	32285.1	55738.4	22602.2	58964	8390.98	6207.58	11385.9	76040.6	6313.94	35626.3	10537.7	3367.96	21589.6	22118.8	466808	19995.3
495	negative	1-Methylxanthine	0.9262	NA	NA	MS2 reverse	203.001	29.014	70503.5	74866.9	73170.1	65364.3	67767.7	67450.6	67859.2	74455.4	65482.4	60035.1	65725.4	57738.7	19225	31439.4	33256.9	24025.8	142380	274029	57933.7	17675.8	57806.7	57871.3	135511	31854.4	104022	94938.4	75692.7	40976.4	173040	85270	32019.1	40877.6	72402.5	85389.1	42865.6	75789.1	97300.8	21452.2	12390.1	33740.6	37699.3
101	negative	Citraconic acid	0.9916	NA	NA	MS2 forward	129.02	431.68	4499.21	4324.07	5197.8	4070.26	4478.84	4695.05	4723.32	4411.4	4458.8	4369.73	4222.71	4728.96	4171.25	4764.05	4585.9	4266.46	4425.28	4161.25	4338.09	3717.31	5019.82	5387.89	2629.92	5610.62	4611.05	4191.39	6112.15	5798.45	5867.94	4234.37	7068.23	5180.96	5364.48	3579.84	6306.84	3238.38	2821.47	5518.53	5949.32	4983.71	6568.37
757	negative	D-Mannose	0.9495	NA	NA	MS2 reverse	239.076	386.615	17230.8	15630.9	16383.5	14394.3	15347.2	15231.2	14560.7	14879.6	15388.6	13987.3	13747.1	13436.8	16994.6	12687	18339.1	11947.5	11785.2	17662.8	11074.9	10408.1	23045.5	10655.9	10735.9	12441.1	14290.1	18526.8	14284.5	20922.5	26785.6	13200.9	21383.9	11304.7	21797	14990.6	19305.5	10588.9	9419.78	11278.8	27436.4	11761.4	15785.9
112	negative	L-Leucine	0.9923	NA	NA	MS2 forward	130.089	258.954	186446	184207	218660	229667	198744	200768	194014	197823	195666	193412	192378	224198	229845	206907	110594	157819	152302	175896	208973	128023	128983	156585	206480	143425	220432	208804	159898	153300	142616	139620	260419	189267	176238	204608	284882	216041	225079	397151	104605	131739	230514
3666	negative	NA	NA	NA	NA	Unmapped	657.326	192.274	98216.9	115878	103708	120481	111421	99588.1	109837	118056	116642	107590	106054	194401	28428.8	26861.5	154940	108514	120654	22981.4	51396.9	24008.2	31766.6	39657.1	33913.1	61241.7	393594	85508.1	18025.3	44395.3	69976.5	32114.9	22995.5	17032.8	58364.6	45438.1	28974.1	39439.4	7046.63	11468.8	72922.7	537960	79436.6
2444	negative	NA	NA	SAICAR;1-(5'-Phosphoribosyl)-5-amino-4-(N-succinocarboxamide)-imidazole;1-(5'-Phosphoribosyl)-4-(N-succinocarboxamide)-5-aminoimidazole;5'-Phosphoribosyl-4-(N-succinocarboxamide)-5-aminoimidazole;(S)-2-[5-Amino-1-(5-phospho-D-ribosyl)imidazole-4-carboxamido]succite;SAICAR	17.676865777581;17.6958057690891	MS1 mz matched	453.082	28.7645	58456.2	59861.8	55694.1	63738.6	57533.8	55743.6	51076.4	53005.7	54228.9	51384.6	53671.9	117212	4228.33	19977.6	6935.25	24676.2	48856.9	4552.55	73004.5	62527.7	2671.22	68898.7	1860.31	4574.15	5618.87	31059.5	8274.32	195887	4648.04	39186.3	5842.54	7335.34	8447.33	50982.8	9197.27	18690.9	88463.4	11934.4	12651.6	41760.3	6989.87
3187	negative	Protoporphyrin IX	0.8114	NA	NA	MS2 reverse	561.251	29.989	13421.4	13389.2	14488.7	13850.6	16003.2	14491.2	14925.2	15851.5	13715.5	14584	13000.6	9270.75	7710.23	6760.84	32815.2	18234.3	10740.8	8730.6	4534.65	6424.73	14239.9	9000.12	4883.89	12204.7	21228.9	21272.4	13565.9	11055.1	11229.8	6083.31	10245.8	5535.81	16599.5	6058	10900.7	4554.66	3939.35	4304.58	13938.2	34107.9	11046.8
497	negative	L-Tryptophan	0.9993	NA	NA	MS2 forward	203.082	254.009	74674.6	75886.4	83882.6	72215.4	80201.5	70704.4	77417	71219.8	74888.3	69755	65539.9	69861.6	76491.5	100133	47692.9	45155.8	71667.4	73444.2	102263	35525.1	60329.1	67888.7	124817	59655.9	67834.7	82887.8	135247	31820.7	48901.5	95585.3	71896	137184	104469	73005.3	103103	98399.1	146002	167326	25196.2	31171.3	58057
377	negative	NA	NA	5,7-Dihydro-2-methylthieno[3,4-d]pyrimidine;	14.3448319625752;	MS1 mz matched	187.007	28.719	1657516	1857520	1695159	1478522	1520541	1524470	1602244	1702005	1565738	1525310	1525544	3627239	95326.3	2396064	96200	143103	1439159	84235.1	2522640	304275	60610.7	344689	1589428	58553.3	702417	413875	1160890	23069.3	351434	3565808	37837.9	456914	80569.8	2426659	490388	3237424	3745227	384539	13491.9	1619950	43671.9
4385	negative	NA	NA	PI(16:1(9Z)/18:1(11Z));PI(18:1(11Z)/16:1(9Z));PI(18:2(9Z,12Z)/16:0);PI(18:0/16:2(9Z,12Z));PI(16:2(9Z,12Z)/18:0);PI(16:0/18:2(9Z,12Z));PI(16:1(9Z)/18:1(9Z));PI(18:1(9Z)/16:1(9Z));	-16.5420883556001;-16.5420883556001;-16.5420883556001;-16.5420883556001;-16.5420883556001;-16.5420883556001;-16.5420883556001;-16.5420883556001;	MS1 mz matched	833.512	189.071	115345	128748	113438	111631	116763	116546	116775	111587	105254	119544	97121	46464.1	260702	117578	67203.4	59332.1	95339.1	82593.2	72030.1	136816	54360.8	246456	135662	80569.6	70826	89672.3	143708	79149.8	37974.4	59729.7	128539	104410	121304	164856	54699.5	83188.7	101416	77654.4	50692.6	33564.2	151866
3516	negative	NA	NA	Glycochenodeoxycholic acid 3-glucuronide;	-8.33378359720511;	MS1 mz matched	624.334	331.455	8065.88	7578.16	8751.97	8764.28	8230.96	8959.99	8759.36	7529.8	7484.46	8886.16	8950.92	23537.8	1728.49	3723.84	7318.78	14588	15207.6	1016.13	11290.5	7270.69	1116.81	4513.68	2175.43	1227.73	33995.3	4341.39	1563.59	3256.08	5623.63	1523.86	1364.37	1181.45	760.439	3610.75	2171.24	2863.26	2670.89	5187.33	3288.25	48473.2	2455.04
723	negative	NA	NA	Pterosin F;Carbamazepine;Glycosminine;alpha-(p-Methoxyphenyl)-3-pyridineacrylonitrile;alpha-(p-Methoxyphenyl)-2-pyridineacrylonitrile	-0.119018982271974;7.47495711467614;7.47495711467614;7.47495711467614;7.47495711467614	MS1 mz matched	235.097	306.668	16223.6	17587.5	16570.6	18783.4	16662.3	17441.4	15750.8	16853.2	16487.2	18953.4	14707.8	20176.8	1589.7	2181.23	62733.3	14372.4	4781.07	1470.13	1709.41	8421.72	43677.1	791.1	772.928	20832.6	18418.7	23979.1	10875.9	24691.1	27335.5	1027.46	22421.4	382.359	2007.41	20409.3	24369.9	3560.29	1140.34	2419.73	35596.1	22048.1	2111.04
188	negative	3-Methylphenylacetic acid	0.8563	NA	NA	MS2 forward	149.061	90.083	23407.9	23957.2	25956.8	24263.7	29351.8	25884.5	25612.1	27644	28218.3	28226.8	25767.5	25563.4	24337.4	20273	17912.3	22406.9	28294	28104.8	23238.4	18408.8	38847.4	22429.6	73237.6	45407.4	26134.9	24805.1	23394.7	19647.6	25442.1	46344.1	32490.2	25746.3	19640.9	20929.5	28801	18811.3	95898.4	24510.3	22043.1	14078.4	21298
300	negative	L-Citrulline	0.9921	NA	NA	MS2 forward	174.089	383.885	5623.02	5167.99	5858.15	4984.71	5565.1	4898.44	5068.92	5269.28	5964.51	5883	4997.23	4148.62	10376.7	4720.49	4421.85	3969.82	4544.19	5643.81	7233.89	4640.42	5357.38	6751.86	5163.15	6020.05	4832.86	3569.49	6944.04	4863.66	3447.57	6076.5	7654.06	5361.09	5062.49	7401.93	4453.25	4497.37	8745.56	5652.09	2546.1	2992.3	6476.15
171	negative	L-Glutamate	0.9972	NA	NA	MS2 forward	146.047	389.262	58489.4	49925	59593.8	53811.3	55478	50515.9	49093.8	54763.2	61416.4	51813.2	53641.9	37295.4	174902	48792.1	21750.8	28134.3	54145.4	105393	53294.1	27044.2	44882.7	71772.1	79865	56426.5	103744	41702.9	70334.2	59698	44935.2	37802.3	174933	30201.8	87193.9	90477.1	52637	34549.4	48329	81966.7	37966.8	31497.6	76868.1
423	negative	NA	NA	NA	NA	Unmapped	194.928	420.896	75964.7	67143.7	63142.4	75284.4	72567.6	71770.6	76401.2	75413.8	65672.8	63780.9	76773.2	74766.3	92287.8	108414	79724.1	88072.9	85745.5	74361.5	75341.5	86883.7	74346.3	89403.7	84218.5	112522	57201.2	101431	86324.1	49275.6	98036.7	98511.1	99301.9	91010.2	64929.7	88704	83219	87726	90329.8	87164.4	61995.7	41447	85165.9
4611	negative	NA	NA	NA	NA	Unmapped	888.982	349.033	15919.2	15768.1	16251	17837.4	18526.8	17526.6	15440	16418.4	15428.5	14520.8	15289.9	18394.3	18159.2	18766.8	17996.1	16709.9	19546.9	18384.9	16282.5	16207.2	18945.4	19157	16972.5	17302	14231.2	17167.1	17762.5	18641.8	16671.5	17917	17359.3	18243.9	17585.6	16548.1	18306.4	15658.1	17301.2	18896.3	17341.8	15416.4	15938.4
258	negative	NA	NA	NA	NA	Unmapped	165.092	87.271	98935.7	96762.9	112674	111532	109556	107259	103412	108737	88459.4	96631.5	97396.8	86196.6	17192.3	83616.3	87276.1	107327	117551	104190	42336.9	46182.4	63931.8	102517	67742.2	95541.1	108302	61271.5	105833	105336	151086	34200.6	408524	19262.8	147571	19196.9	127448	76110.4	54570.9	46827.3	55307	90228.9	303994
1193	negative	NA	NA	NA	NA	Unmapped	288.006	349.172	37421.6	39198.3	39332.9	44869	34852.3	40590.1	39560.8	40124.1	36272	35519.5	35851.6	42594.7	45125.2	40722	37053.6	39492.1	36652.4	39785.7	34783.7	48918.6	32769.3	44588.8	42231.7	42847	36481.9	47231.8	42523.4	45642	41929.3	39071.6	50160	36829.8	43332.5	42092.7	43580.1	43647.1	38887.8	37984.9	38053.6	35045.8	36334.3
2251	negative	NA	NA	IDP;Pseudorhodomyrtoxin;psi-Rhodomyrtoxin	-23.1721782525237;-17.5672346085136	MS1 mz matched	427.176	33.773	64038.9	67323.4	68281.9	66138.4	61344.6	71550.2	71350.3	60538.2	65351.8	58194.9	56809.8	51683.4	16242.8	10090.3	143885	67330.8	42640.4	32364.2	10303.2	11828	59287.6	10800.9	8035.12	57257.2	101635	11856.2	53511.9	574192	56066.4	209655	22351.8	11339.4	89752.4	15539.1	13845.9	13389.1	13893	11276	247872	45222.6	255031
2356	negative	NA	NA	Dihydrozeatin-9-N-glucoside;Dihydrozeatin-7-N-dihydrozeatin;Dihydrozeatin-O-glucoside;Dihydrozeatin-O-glucoside	-11.7010134699213;-11.7010134699213;-11.7010134699213;-11.7438126418418	MS1 mz matched	442.189	300.993	5689.94	5457.69	6260.23	5518.89	5462.73	5907.44	5094.54	5195.16	5064.05	5162.19	4817.19	9447.88	1441.38	4672.39	8517.4	9465.89	3371.34	2790.89	5346.89	2513.91	4952.49	5361.68	1152.28	3819.79	3899.49	4126.23	7127.6	4449.22	6170.69	3110.76	1854.33	2664.48	5251.62	2541.27	7224.49	4805.74	4162.71	6815.79	3015.3	3446.01	3631.19
339	negative	D-Mannitol	0.9786	NA	NA	MS2 forward	181.071	296.042	31494.8	30519	33019.9	35093.8	34127.4	32452	30020	32187.1	27374.1	29570.7	28089.6	6316.06	14901.1	10130.8	10598	15596.8	12164.8	49953.3	8989.99	41782.9	37539.8	7782.59	10893.5	11778.4	11356.5	12161.5	8914.85	9572.85	12922.1	9606.87	51979.3	8615.85	18436.5	102136	9344.7	71564.9	8867.09	28876.2	278018	43197.5	20920.8
4323	negative	NA	NA	Periandrin I;Glycyrrhizin;Licoricesaponin K2;Uralsaponin B;Glycyrrhizite;Glycyrrhizin;Glycyrrhizic acid;(3beta,20beta)-20-Carboxy-11-oxo-30-norolean-12-en-3-yl 2-O-beta-D-glucuronosyl-beta-D-glucosiduronic acid	-9.46724727382413;-9.46724727382413;-9.46724727382413;-9.46724727382413;-9.48439197397726	MS1 mz matched	821.39	367.546	9336.95	8332.97	7000.3	7422.13	8027.22	7700.98	8735.8	8096.38	8393.95	8069.85	7963.42	228.107	517.189	1061.73	1233.22	217.192	2613.82	8453.1	1277.18	433.6	1032.11	28.8308	108.306	4398.6	4679.21	374.482	876.999	293.279	3173.58	11503.1	641.324	102.566	1261.19	829.196	167.242	192.451	3511.76	117.087	106.043	89.6524	665.354
3278	negative	NA	NA	Taurochenodeoxycholate-7-sulfate;Taurochenodeoxycholate-3-sulfate;	-7.89533325307337;-7.89533325307337;	MS1 mz matched	578.241	190.664	56477.6	66003.4	66602.1	56364	53593.4	55574.1	61471	53612	58988.7	62339.3	57921.4	141885	2866.38	13395.1	19484.7	14600.9	19094.4	10417.6	6596.19	6736.54	7647.77	21098.9	3517.96	9152.84	289893	9430.38	15700.6	13535.2	13169.9	10050.5	5241.43	6050.14	14866.4	6839.32	20164	13630.4	2328.88	10956.5	9251.19	685287	26304.7
2152	negative	NA	NA	O-Deethylated candesartan;Eupachlorin	-5.68657745009014;-6.92792958707593	MS1 mz matched	411.126	328.521	12967.4	13144.9	14229.8	14781.5	14491.4	12695.1	16571.3	14615.9	14296.2	15385.8	14309.3	11866.5	2804.64	2593.1	34210.5	15597.5	4544.49	1348.54	1881.76	12511	50217.3	2288.42	967.444	23557.1	22703.9	20051	11806.8	18050.4	3226.33	1242.39	19395.6	2417.25	1629.75	32751.8	31439.4	28222.5	2170.35	1058.91	16731.2	31799.4	2308.01
167	negative	L-Glutamine	0.9952	NA	NA	MS2 forward	145.063	366.081	110925	118252	114218	110038	109476	114074	134681	124269	129851	130137	129092	83050.2	152362	77301.2	103104	114162	110072	144041	202264	86641.1	147190	230837	110020	194841	70572	131386	180108	133764	100169	141152	162453	119694	128298	131528	121577	98820	255924	140262	115584	103180	200584
3191	negative	NA	NA	NA	NA	Unmapped	561.484	39.067	95960.8	94916.2	107987	112709	116354	115628	107807	96840.4	97275.8	99562.8	101244	160734	53914.5	64447.3	76967	219052	87843.8	71232.6	87555.9	158383	127608	220524	64902.8	76840.7	81551.5	46820.7	72855.7	48003.4	80926.1	84582.6	164888	30437	80967.4	115634	120340	63118.5	90166.8	112560	7805.31	150055	170877
2304	negative	NA	NA	Glutathionylspermidine;N1-(gamma-L-Glutamyl-L-cysteinyl-glycyl)-spermidine	2.36994	MS1 mz matched	433.232	246.248	13280.6	13717.9	14652.7	12626.1	13225.3	12832.3	12600.9	13424.8	14215.7	11158.6	14864.4	8301.84	28832.8	7480.11	9227.08	5263.86	10509.4	19714	10435.5	12393	12195.9	20279.3	16334.6	12063	17245	10012.1	7975.69	8145.65	6961.65	6801.52	19283.9	10279.2	15929.4	24845	8732.54	13641.4	13167.4	24833.5	9330.67	19373.6	27566.9
2761	negative	NA	NA	LPA(18:0/0:0);LPA(0:0/18:0);	-21.9957969633747;-21.9957969633747;	MS1 mz matched	497.29	31.691	83152.7	92937	86364.2	80428.2	73454.1	86907.5	90939.5	90409.3	86869.9	81406.7	72837.4	95572.9	22060	38070.4	305806	111740	64155.6	69346.3	48163.3	65990.5	110629	54187.7	75306.4	70745.8	142307	158654	88850.5	146962	106505	38454.9	75510.3	39124	188239	42230.6	38171.7	26472.2	14216.1	27733.6	122700	225478	80827.7
2937	negative	D-Mannitol 1-phosphate	0.7003	NA	NA	MS2 reverse	523.305	31.2	20860.4	26544.7	25384.1	25619.7	21341.8	24512.2	24107.2	24564.8	24614.5	22211.7	21914.7	22190.4	9746.91	18128.6	21504.2	26036.3	27550.6	29065.7	25490.9	25564.7	33050.6	29013.6	27258.1	24259.5	40497.4	36143.5	30904.3	18293.4	24341.1	21770.3	21741.2	17729.1	35175.3	20040.5	21358.3	17777.1	14411.1	12878.4	17545.2	31473.4	26491.7
1092	negative	Thymidine	0.7778	NA	NA	MS2 reverse	279.038	164.066	699410	707046	721891	764296	746891	715896	614321	668130	647224	652496	590678	525408	1434668	802632	478603	425023	547440	1057707	627678	798262	621510	880877	947465	640981	680250	947858	913173	753232	705352	630689	772168	543504	1007689	679706	555445	613644	858218	964155	536374	465396	663229
2170	negative	NA	NA	NA	NA	Unmapped	412.963	27.2295	33952.4	35069.9	31185	30130.1	31838.6	29042	34999.4	36519.8	33431.7	31632.7	28645.8	35459	21969.6	36117.9	74554.8	7658.6	18884.8	19864	59906.7	97134.8	20518.1	44419.9	23380.1	11390.9	13518.2	7952.07	9384.01	39603.7	5633.89	100067	20840.6	40105.1	142847	38302.6	31177.3	41263.8	49216.9	67160.4	31692.3	34450.8	71599.1
1625	negative	NA	NA	NA	NA	Unmapped	333.005	29.783	68604.5	81324.2	74891.9	71632.3	63540.9	69461.3	81128.6	76802.6	73900	74676.4	65146.7	9780.85	23367.2	8635.26	598222	19397.7	49947.2	975211	30377.1	103250	9990.2	6175.47	132200	6845.02	59963.3	10682.1	16646.6	5764.43	8317.44	95069.6	934338	3528.63	6536.01	66015.4	8401.56	30509.9	8706.21	243513	7558.03	386468	4373.39
378	negative	NA	NA	Isoplumbagin;Pydanon;Hexahydro-4-hydroxy-3,6-dioxopyridazine-4-acetic acid	-24.3358927609366;-2.83019921465309	MS1 mz matched	187.043	224.583	774238	799605	753477	761753	825846	756215	801201	855688	945924	892139	903548	594977	829064	639954	595083	704696	769178	859342	916504	647178	645980	604884	962381	586745	1007059	862836	648505	778439	897770	797041	867024	710364	809942	829274	650902	801085	770859	963186	813268	833424	732672
1864	negative	NA	NA	Testosterone sulfate;Epitestosterone sulfate;Dehydroepiandrosterone sulfate;Dehydroepiandrosterone sulfate;3beta-Hydroxyandrost-5-en-17-one 3-sulfate;DHEA sulfate	-2.02273028032822;-2.02273028032822;-2.02273028032822;-1.90131780335543	MS1 mz matched	367.156	29.374	1300764	1376022	1228376	1392759	1273434	1312069	1354248	1131594	1134173	1132010	1172113	729447	13288	361891	4822859	750746	2550394	1964712	219207	886081	573755	158410	421553	422840	683897	3201135	1440794	1201734	3661639	129364	861352	521870	569978	2517205	575790	353921	6360618	325922	969979	361041	695131
134	negative	Hypoxanthine	0.9868	NA	NA	MS2 forward	135.032	170.28	218585	255053	269517	237008	240759	261613	253489	232444	211558	229353	216451	88871.8	466948	221148	116874	120879	151603	565745	249501	96256	80313.7	261266	867332	84477	173411	233370	183274	166140	612943	206247	626066	101679	263108	188606	158187	129324	139888	225798	90730.2	79627.4	269401
405	negative	NA	NA	NA	NA	Unmapped	191.108	306.887	29714.2	34072	32455.3	34571.5	30909.3	30986.8	30950.2	31366.4	29469.7	28415.1	25587.3	40415.3	3240.05	5480.59	108369	26092.1	9257.65	2804.96	3061.52	16051.3	78089.9	4212.18	2153.85	35854.7	32789.1	38726.9	23165	43390.4	51956.4	3929.84	40651.3	4888.33	4136.9	37807.8	40860	8621.38	4295.95	2792.28	65124.2	37622.4	6424.55
796	negative	Uridine	0.6476	NA	NA	MS2 forward	243.061	163.994	109206	111670	115930	121784	112718	112927	95340.9	103088	101646	102569	93310.2	82995.1	226244	122388	80581.8	66616.6	95590.2	171158	93304.6	124523	92195	135167	152671	97462.6	98961.8	148815	148406	116713	113508	102117	117546	77421	157294	110972	87274.9	98626.9	128696	149596	81911.6	69842.7	97325.1
2842	negative	NA	NA	AFN911;	-24.5923103126025;	MS1 mz matched	510.248	184.048	138357	164498	146113	152029	149167	141158	135818	129538	122621	130838	142467	237714	76318.7	37462.9	422212	119813	243860	62108.3	121317	116544	64501.5	171207	66675.7	68320.8	202466	143783	60324.3	80305	126871	12631.2	111760	123070	172318	153345	37650.2	57766.2	99972	73570.4	219889	432657	128352
2701	negative	NA	NA	Atrovirinone;5,10-Methenyltetrahydrofolate	-16.260962178253;17.0991434643889	MS1 mz matched	491.137	33.46	21467.4	22491.2	22983.4	24579.7	22120.2	24949.7	20997.9	20839.3	19180	19829.5	20668.7	22568.2	2075.38	5673.45	189395	14797.9	11786.3	14409.3	2781.99	6636.01	35993.4	2634.73	5799.88	11373.5	21525.7	5721.91	14541.6	55563.4	38355.4	2368.72	17762.2	3148.52	16692	4583.7	6774.97	3968.04	6716.64	2581.72	70425.1	6650.78	38824.9
97	negative	L-Pyroglutamic acid	0.9844	NA	NA	MS2 forward	128.037	294.789	116241	139992	157368	158369	151698	144542	156900	158286	151548	146989	141906	94260.7	171710	124078	120353	95775.9	118327	183991	156901	107840	117758	186164	182244	107238	139114	103026	140992	181450	122325	128699	228580	86014	153630	158670	156988	116662	152937	269958	151987	131902	165588
3181	negative	1-Stearoyl-sn-glycerol 3-phosphocholine	0.7958	NA	NA	MS2 reverse	560.326	170.436	158693	171568	171731	164305	156322	153384	153406	131581	165598	147608	136403	135992	619639	105561	114842	101509	192530	135676	195244	168469	177055	199864	223402	230732	245270	218632	119824	82100.2	63560.9	261836	274735	193021	218174	337012	124337	127478	348255	334672	94367.1	98503.5	271660
442	negative	NA	NA	NA	NA	Unmapped	197.032	155.358	1514190	1865218	1842504	1817178	1747191	1762745	1789554	1849862	2091526	1605280	1686709	1651795	2018892	1838104	2038052	1987440	1590876	1533409	1534587	1063615	2298675	1876595	1558526	1512148	1758380	1679491	1689765	1884834	2700592	1539236	1724762	2013207	1219235	1575231	1374877	1513447	2262265	1950615	1679755	1225439	1803415
2039	negative	NA	NA	Cefdinir;Cefdinir	-9.5373632100772;-9.51230242928414	MS1 mz matched	394.032	234.731	7655.77	7991.22	6171.7	7833.84	8247.88	7826.85	7905.43	7942.74	7352.61	6611.62	8068.45	5145.29	9081.4	7587.76	7141.82	7562.76	7327.55	8352.98	10095.6	6271.48	6384.49	4746.25	8908.81	9216.25	10238.3	9814.08	7069.72	7584.52	7806.44	8600.04	8217.84	9235.73	8813.88	7819.08	9398.27	7929.6	9463.8	9665.94	8828.2	5616.73	8628.07
4584	negative	NA	NA	PI(20:3(8Z,11Z,14Z)/18:2(9Z,12Z));PI(18:1(11Z)/20:4(5Z,8Z,11Z,14Z));PI(22:5(7Z,10Z,13Z,16Z,19Z)/16:0);PI(18:2(9Z,12Z)/20:3(5Z,8Z,11Z));PI(22:5(4Z,7Z,10Z,13Z,16Z)/16:0);PI(18:1(9Z)/20:4(8Z,11Z,14Z,17Z));PI(18:1(11Z)/20:4(8Z,11Z,14Z,17Z));PI(16:0/22:5(4Z,7Z,10Z,13Z,16Z));PI(20:4(5Z,8Z,11Z,14Z)/18:1(11Z));PI(16:0/22:5(7Z,10Z,13Z,16Z,19Z));PI(20:4(8Z,11Z,14Z,17Z)/18:1(9Z));PI(20:3(5Z,8Z,11Z)/18:2(9Z,…	-15.870595478201;-15.870595478201;-15.870595478201;-15.870595478201;-15.870595478201;-15.870595478201;-15.870595478201;-15.870595478201;-15.870595478201;-15.870595478201;-15.870595478201;-15.870595478201;-15.870595478201;-15.870595478201;-15.870595478201;	MS1 mz matched	883.527	185.191	38957.9	48605.6	50142.4	46664.9	43365.6	48594	50845.9	52378.1	47103.9	42454.6	45296.4	20495.9	129877	51769.1	21550.8	26551	40770.1	28984.2	27850.3	53532.9	26670.7	75875.9	46958.3	38091.9	32947.5	50721.1	33496.6	23320.8	16064.7	28727.3	79373.1	71844.6	51570.6	57721.1	20244.5	32823.4	47111.6	34748	17739	15232.4	58351.5
4433	negative	NA	NA	NA	NA	Unmapped	844.598	40.343	47157.8	46591.8	44398.6	53583.1	54123.8	42172.6	51306.5	48133.8	49177.8	42393.3	45577.1	28972.7	39355.5	66212.3	23499.1	31062.3	53582.7	46239.6	26193.8	57271.4	29177	46155	57438.4	57520	34771.4	44872.7	40912.7	33317.2	11958.9	31386.2	39571.9	35852.5	53417	48291.6	43043.1	71709.5	44098.6	40934.5	35744.2	33073.7	40524.3
887	negative	NA	NA	Anagrelide;8-Dehydroxythiemycin;8-Deshydroxythiemycin;Deshydroxythiemycin;NS-5;C20823;Carbapenem biosynthesis intermediate 4	3.90490768788992;3.12392371076277;3.12392371076277	MS1 mz matched	255.086	308.583	30589.3	32910.8	32922	33320.2	32903.6	34924.7	36145.6	37348.1	35366.9	41559.1	37154.5	58597.5	14617.8	86336.1	20768.2	37029.6	5520.43	14892.3	9973.43	14297.5	22188.7	35394.8	16625.9	11565.6	24681.4	17977.1	4206.84	23867.2	13972	122464	10619.2	130541	54876.3	35123.6	13128.4	20327.6	23633.8	29480.2	59828.2	88291.4	48920.9
2882	negative	Taurocholate	1	NA	NA	MS2 forward	514.28	193.417	272256	366787	375534	376845	365704	375120	365973	365922	388000	369187	344901	258841	119114	58696.8	195742	121476	430792	52293.9	30151.8	167248	181167	106168	27952.3	82723.6	585240	139949	686220	42166.4	97691.7	36965.6	14877	91303.3	238805	28789.6	197455	77018.4	7508.33	82582.8	153613	3656746	128650
622	negative	NA	NA	1-Benzyl-1,2,3,4-tetrahydroisoquinoline;(R,S)-Tetrahydrobenzylisoquinoline;(RS)-1-Benzyl-1,2,3,4-tetrahydroisoquinoline	-9.30194623220052;-9.30418699623541	MS1 mz matched	222.134	270.758	4722.76	5085.14	4237.78	4031.6	4909.99	5012.62	4556.45	3971.65	4169.23	4428.45	4423.48	3812.35	7886.84	5278.89	6119	3274.24	3444.89	6511.48	2651.11	3480.66	3405.07	2900.54	4635.76	3688.68	4828.8	8202.4	5337.67	4758.43	5638.76	2712.86	8809.52	2874.61	5838.07	4449.27	6394.7	4108.67	4163.79	4897.73	3972.61	4140.29	4881.93
3528	negative	NA	NA	Zizyphine A	-18.4831	MS1 mz matched	627.369	278.709	8497.89	7742.39	7927.29	9490.55	10516	8824.99	8592.19	8274.56	8542.74	8615.06	8770.46	14973.5	7219.19	7471.72	6220.76	13462.5	9467.1	6317.54	10856.8	5855.02	8729.53	8178.68	4277.74	7370.28	11944.7	8395.97	4515.62	8813.93	18275	7651.04	11415.8	4251.68	4411.91	8495.13	6693.92	7794.56	2787.24	3429.06	6392.35	17811.2	11660.5
79	negative	Taurine	0.9997	NA	NA	MS2 forward	124.009	291.322	118446	150038	144645	143652	144358	134362	149794	157585	162498	163400	148828	116764	144884	239332	120436	132358	119600	180778	98561.9	119349	129889	106371	123208	148885	157277	127918	183301	184447	137463	144805	237636	125268	247002	121522	185567	145415	156115	155935	163114	127393	145029
2767	negative	Taurochenodeoxycholate	1	NA	NA	MS2 forward	498.286	156.062	560730	697958	750512	726172	694320	657311	702179	690440	646874	574634	677150	504897	160621	173419	1438193	413313	669412	153400	82180.4	596917	259375	174918	46104.1	154132	509086	220342	1053899	111480	243571	170636	40329.1	151603	1005377	73527.5	648246	112272	11944.7	474168	118154	3572802	183017
200	negative	NA	NA	NA	NA	Unmapped	154.026	155.501	74010.6	86696.9	86888.7	88259.8	80666.6	86516.1	81224.2	83769.1	97518.2	70361.7	81428	83573.3	95415.1	88226.9	101840	88203.5	68659.6	68151.9	68740.9	43347.7	85976.8	90212.2	76222.2	75003.7	77849.7	80078.6	83242.4	92559.5	125834	76856.8	82834.3	94271.5	51377.8	73810.2	61522.2	72508.1	118410	86289.4	84342.4	52488	92945.5
960	negative	Alpha-N-Phenylacetyl-L-glutamine	0.9953	NA	NA	MS2 forward	263.102	215.245	10061.4	11837.5	12404.9	14226.5	12398.4	12613.1	13497.7	11307.2	12333.2	12308.8	12721.3	27090.2	5605.17	5888.29	6086.96	13922.5	22284	2649.92	13003.5	17209	3852.83	5574.18	3685.77	1752.92	10145	3153.64	9090.7	4715.99	8614.41	26904.6	7383.15	5632.57	1905.17	16990.6	3162.57	24926.8	12459.9	8233.34	2342.51	11255	7800.76
1898	negative	NA	NA	Lepidimoic acid;Dinitramine	0.00993511134261992;3.41520617429303	MS1 mz matched	374.091	339.394	4423.26	5214.63	4933.76	5946	4991.19	4962.25	5839.86	5007.36	5226	5591.44	4828.83	3861.44	5048.44	5603.71	6658.01	3830.81	7583.33	4565.25	3413.34	2945.98	9368.53	3353.8	3483.18	6016.76	6078.8	7086.17	5519.43	8127.46	10281.8	3539.2	5020.56	4791.03	3811.14	3862.4	5215.53	2909.35	3670.99	3268.18	6863.71	3386.89	4645.09
2269	negative	NA	NA	Coumestrin;Daidzein 4'-O-glucuronide;Daidzein 7-O-glucuronide;Benzofep	4.87177106093457;4.87177106093457;4.87177106093457;16.2574802056403	MS1 mz matched	429.092	164.044	10002.2	8884.47	9712.04	10820.7	9710.82	10287.7	9268.34	9609.44	9262.18	8337.21	7963.17	9063.65	6558.27	12416.6	7834.46	5849.9	7332.88	11604.2	7724.05	11825.7	10677.3	10728.7	6117.54	11667.2	5732.21	9831.9	17627.3	12437.5	6878.54	8116.35	4516.93	10680.8	17243.1	5636.2	9949.27	9907.84	13324.8	14634.3	11621.3	6895.9	7019.16
3661	negative	NA	NA	NA	NA	Unmapped	656.468	39.041	8290.35	7823.13	8288.61	7836.59	8101.15	8529.4	7573.2	9287.25	9799.48	7326.16	8667.43	16999.6	4038.87	6204.3	14154.7	8370.09	10362.2	4843.65	9627.05	6279.44	8956.28	6632.76	8897.86	7086.86	6721.99	8274.14	4171.7	1816.27	15651.9	8365.58	2648.16	4393.83	4920.96	8222.97	5790.36	5293.89	17154.4	9015.7	4996.52	12000.1	5744.72
2372	negative	NA	NA	Porson;Gingerenone B;Isogingerenone B;Burseran;(+)-Burseran;(+)-Eudesmin;Pinoresinol dimethyl ether	0.158996122864972;0.158996122864972;0.158996122864972;0.258951366019982;0.258951366019982	MS1 mz matched	445.186	51.377	265891	245200	308070	279258	274046	262997	274258	274772	285470	339350	282095	655465	25904.2	74596.7	2645952	815936	285372	59908	19054.8	74964.9	222936	38731.8	31331.6	95115.9	989722	33616.6	150928	430985	967882	8648.76	128516	52069.5	64477.8	97182.4	117079	71136.4	31118.5	29812.7	1021902	361961	449471
2591	negative	NA	NA	NA	NA	Unmapped	477.264	27.9395	23295.9	22604.1	24411.5	18576.8	21421.5	22463.5	25569.8	22023.3	25185	24983.3	23996	31424.2	17930.9	15962.1	36381.9	30069.7	18121.7	22236	19201.2	20601.1	26957.2	29739.3	25816.6	16440.5	28434.6	24800.3	27436.7	19204.2	17454.7	32196.9	27652.1	31442	31431.4	20622.8	19735.8	17045.9	16599.5	17308.4	22046.6	35492.7	26295.4
4981	negative	NA	NA	NA	NA	Unmapped	1067	349.095	199154	200075	210746	237739	243456	235084	235456	209335	203084	200898	190593	244481	254587	182945	234589	218359	204025	240572	207590	238178	211863	244816	233317	227342	221931	217029	238494	248132	250854	241579	251620	240814	229692	245683	248942	211504	243480	177733	246410	179361	232153
2833	negative	NA	NA	NA	NA	Unmapped	509.289	31.939	31667.5	33589.9	32312.1	30787.5	31606.7	32438.8	34488.6	33616.7	36397.6	25255.7	34534.1	34311.7	27757.7	30312.1	23261	32140.7	32007.8	36557.6	34648.5	43167.5	45218.8	47311.7	46885.8	34512.2	35406.3	39157.5	34440.5	24141.8	20414.3	44870.9	26426.6	31336.4	42415.2	53065.4	30702.4	26693.8	27448	29933	18795	39777.6	32564.7
166	negative	alpha-ketoglutarate	0.8001	NA	NA	MS2 reverse	145.015	361.233	11096.1	11974.6	12867.6	14879.7	14643.3	12169.4	13007.7	11969.5	13566.3	12538.3	13019.4	17279.9	10649.1	13240.8	6075.83	12944.9	10179.4	12588.2	9094.34	9088.88	10078.3	12162.8	8415.7	4713.9	44476.7	6367.04	9621.62	12068.7	15703	7263.25	15529.2	5433.71	6390.13	11984.6	8499.76	6907.9	7427.23	13091.9	11810.4	20861.9	10893.6
3365	negative	NA	NA	NA	NA	Unmapped	593.474	38.443	71339.9	59968.3	58632.1	61815.9	60780.7	56370.3	62376	70653.2	71452.5	61863.5	56981.8	118305	33358.8	77233.4	62839.7	82821.6	118099	27159	138953	80627.9	30386.6	76400.1	104952	72409.1	55098.3	65133	31968.7	8547.31	36463.4	85336	20134.7	49784.2	20426.8	114515	38986	69563.3	167483	67143.4	14653.6	99579.6	73825.9
471	negative	Dodecanoic acid	0.999	NA	NA	MS2 forward	199.17	52.23	128153	120057	122414	117122	114873	114207	106603	100634	96932.7	126199	124142	129455	113832	33498	49499.5	136882	83133	130711	85639.9	38037	158140	122606	19790.1	240191	84731.7	180062	203604	104782	97975.7	84905.4	84882.2	84763.3	253862	31521.2	160696	33238.3	23606.3	18092.7	26887.3	46066.8	257079
1843	negative	NA	NA	Tetrahydropentoxyline;Semilepidinoside B;1alpha,5alpha-Epidithio-17a-oxa-D-homoandrostan-3,17-dione	-6.9087817192666;-6.9087817192666;21.4990592199092	MS1 mz matched	365.14	30.5715	17441.8	21962.1	21348.8	20109.2	17659.8	19830.4	18477.4	16238	19216.5	20420.1	19654.2	16041.6	4610.91	10693.5	81337	36624.5	28686.9	33085.2	4803.43	10475.6	34705.4	5127.99	3035.77	14738.7	34017	30727.3	22532.8	56591.2	32056.9	3721.26	21404.3	6057.49	19847.6	18879.6	10380.1	8495.24	29271.8	8697.64	45987.6	10850	27861.1
2019	negative	Deoxycholic acid	0.6169	NA	NA	MS2 forward	391.282	55.2375	33196.7	29768.8	40928.1	39233.1	38102.3	36141.6	33627.6	38532.5	33683.5	35466.1	37033.3	51676.8	20026	21512.7	55182.8	34460.2	31517.9	42155.8	76499.1	80807.1	48505.9	35014.8	27709.7	26338	14152.6	11174	7537.92	28798.8	26569.2	36104	22088.4	18579.5	49225.5	49197.3	16839.3	38554.6	134173	29678.5	31884.6	35438.4	26119.9
2049	negative	pregnenolone sulfate	0.9662	NA	NA	MS2 forward	395.187	28.6115	668269	708207	825407	659549	707351	780920	637267	730227	773993	622878	683752	559846	14406.6	109294	6657996	1076145	589633	560467	49274	245610	853882	31552.9	208050	452799	1082326	77605.4	1191341	4175029	1660991	33766.5	976181	159086	1811914	133693	150916	136123	122026	159404	2053330	433628	2888228
4490	negative	NA	NA	PI(18:1(9Z)/18:3(9Z,12Z,15Z));PI(16:0/20:4(5Z,8Z,11Z,14Z));PI(18:3(9Z,12Z,15Z)/18:1(9Z));PI(18:3(9Z,12Z,15Z)/18:1(11Z));PI(20:4(8Z,11Z,14Z,17Z)/16:0);PI(18:1(11Z)/18:3(9Z,12Z,15Z));PI(18:1(11Z)/18:3(6Z,9Z,12Z));PI(16:0/20:4(8Z,11Z,14Z,17Z));PI(18:3(6Z,9Z,12Z)/18:1(11Z));PI(20:4(5Z,8Z,11Z,14Z)/16:0);PI(18:1(9Z)/18:3(6Z,9Z,12Z));PI(18:3(6Z,9Z,12Z)/18:1(9Z));PI(18:2(9Z,12Z)/18:2(9Z,12Z));	-16.0216495926274;-16.0216495926274;-16.0216495926274;-16.0216495926274;-16.0216495926274;-16.0216495926274;-16.0216495926274;-16.0216495926274;-16.0216495926274;-16.0216495926274;-16.0216495926274;-16.0216495926274;-16.0216495926274;	MS1 mz matched	857.512	186.294	110512	130268	134759	127678	115917	142743	139424	134306	121894	117323	110818	51500.6	363099	113688	60776	42302.3	117392	94690.4	87123.6	137031	59559	231088	128576	140836	67024.1	151616	105441	84564.3	34544.5	91106.9	122502	154656	173094	192501	62011.7	71554.3	172543	93671	55965.6	38774.9	162920
1920	negative	NA	NA	Steviol;Yucalexin B22;15-HEPE;11R-HEPE;Phytocassane C;Atractyligenin;Yucalexin B20;Yucalexin A19;15-KETE;Leukotriene A4;2-Hydroxy-6-(8-tridecenyl)benzoic acid;17,18-EpETE;Ineketone;Oxymesterone;9-HEPE;12alpha-12-Hydroxy-7,13-abietadien-18-oic acid;18R-HEPE;12-KETE;Aframodial;14,15-EpETE;12-HEPE;5-HEPE;(ent-15beta)-15-Hydroxy-19-trachylobanoic acid;Grandiflorolic acid;(ent-15beta)-15,19-Dihydroxy-…	17.3000086103335;17.3000086103335;17.3000086103335;17.3000086103335;17.3000086103335;17.3000086103335;17.3000086103335;17.3000086103335;17.3000086103335;17.3000086103335;17.3000086103335;17.3000086103335;17.3000086103335;17.3000086103335;17.3000086103335;17.3000086103335;17.3000086103335;17.3000086103335;17.3000086103335;17.3000086103335;17.3000086103335;17.3000086103335;17.3000086103335;17.30000…	MS1 mz matched	377.233	47.073	63229.4	50337.8	45862.3	56964.1	50297.4	53056.5	52743	54153.3	46883.5	54345.6	51704.8	72873.3	39481.7	35182.5	44565.4	101416	52503.5	38883.4	65604.2	35678.1	66518.6	40881.5	25113.4	49785.6	43604.2	31939.7	28693.1	28296.5	46763.3	64937.9	43595	25915.7	33490.6	53249.6	49383.3	32459.7	42298.3	49144.5	9755.04	55814.7	42657
1223	negative	N-Acetylneuraminic acid	0.8485	NA	NA	MS2 forward	290.087	514.804	30415.9	27292.9	27699	27225.3	33867	23706.9	29688.2	28983.5	26695	29191.7	27272.9	34866.5	42296.6	52427.7	52445.5	52892.6	82347.6	53263.5	42493	31375.4	50799.8	19993.6	43526.9	95860.8	42850.3	76558.3	19670.5	17525.9	38914.2	59194	24662.4	35181.3	30909.5	57713.7	38895.7	50118.1	23710.9	37049.5	7470.61	38199.7	20170.8
4593	negative	NA	NA	PI(20:4(5Z,8Z,11Z,14Z)/18:0);PI(20:3(5Z,8Z,11Z)/18:1(9Z));PI(18:1(11Z)/20:3(8Z,11Z,14Z));PI(20:4(8Z,11Z,14Z,17Z)/18:0);PI(18:1(9Z)/20:3(8Z,11Z,14Z));PI(18:1(9Z)/20:3(5Z,8Z,11Z));PI(16:0/22:4(7Z,10Z,13Z,16Z));PI(18:0/20:4(8Z,11Z,14Z,17Z));PI(20:2(11Z,14Z)/18:2(9Z,12Z));PI(20:3(8Z,11Z,14Z)/18:1(9Z));PI(18:2(9Z,12Z)/20:2(11Z,14Z));PI(20:3(8Z,11Z,14Z)/18:1(11Z));PI(22:4(10Z,13Z,16Z,19Z)/16:0);PI(16:0…	-8.0415573508691;-8.0415573508691;-8.0415573508691;-8.0415573508691;-8.0415573508691;-8.0415573508691;-8.0415573508691;-8.0415573508691;-8.0415573508691;-8.0415573508691;-8.0415573508691;-8.0415573508691;-8.0415573508691;-8.0415573508691;-8.0415573508691;	MS1 mz matched	885.544	185.044	290490	341934	363697	335975	298431	338511	359058	358753	321294	285299	295096	116077	311447	317527	131376	130235	331481	195751	145023	327214	141438	614853	341395	313285	169937	449979	316903	187135	74005.1	216023	496179	210772	456844	338599	150457	305984	476722	208550	121670	113686	503054
2926	negative	NA	NA	Metabolite M6;	8.4878902916078;	MS1 mz matched	521.325	27.894	16275	17429.6	13887.3	16106.7	14524.1	15085.4	16623.1	15090.4	15355.8	15660.1	12320.3	8638.53	5557.28	8685.43	8759.5	23128.8	11289.3	17859.6	9189.08	14147.2	20019.3	27044.2	9688.67	18758	30976.3	15740.7	12290.9	14729.7	8658.18	5571.25	11963.7	7420.94	9896.26	10579.2	7341.27	12625.2	11585	5625.13	7933.99	31949.8	8440.52
2801	negative	NA	NA	2-Decarboxybetanin;Polyoxin B	-20.673296999689;12.028120562789	MS1 mz matched	506.147	301.1	6998.47	8036.22	6326.76	7460.98	6978.89	7934.69	7298.53	6340.77	7618.91	8496.25	7597.6	18865.4	595.776	5186.82	3752.41	1054.11	919.266	19558.2	1941.02	5354.53	15137.9	882.778	5935.11	1227.11	5494.92	668.696	1374.09	20291.9	15697.1	1180.83	669.373	2147.54	1196.7	633.758	17344	17308.7	940.15	942.349	27570.3	28229	3508.74
1230	negative	EDTA	0.8292	NA	NA	MS2 forward	291.09	514.864	4116.61	3503.83	3810.19	3571.27	4465.81	3150.04	3876.54	3827.82	3516.42	3683.32	3659.02	4800.8	5507.19	8502.04	6729.56	6942.79	10435.3	6794.21	5559.37	4440.39	6539.65	2525.74	5784.54	13040.4	5609.93	9658.08	3071.76	2319.83	5174.58	7430.07	3344.54	4447.16	4261.49	7498.82	4874.04	7332.24	3177.31	4807.87	913.438	5134.14	2779.09
519	negative	L-Kynurenine	0.9978	NA	NA	MS2 forward	207.077	257.2	2960.65	2559.28	3580.12	3356.19	3185.01	3040.5	2962.87	2827.22	2981.65	2744.66	2983.3	3592.57	2987.97	3261.1	5234.08	2042.41	2371.01	5567.5	1770.37	2290.38	3950.83	1827.43	2400.13	2281.31	5004.61	3022.76	4372.4	3380.73	4780.58	1836.11	2117.37	2634.85	2168.15	3754.7	4093.8	2359.65	1906.08	2237.08	2891.95	2393.04	3120.28
2483	negative	NA	NA	NA	NA	Unmapped	461.029	32.4735	35488.6	40445.6	46980.7	46163.1	48324.5	41293.3	44149.3	41686.3	37504.2	43118.6	40029	308752	659.635	29628.1	14858.1	352.585	405.013	147216	1736.63	9152.22	321594	470.827	80068.6	0	104468	460.812	445.534	55373.8	394786	1109.74	1388.68	219.143	389.7	492.349	54983.6	94419.1	1076.23	603.867	46711.5	85219.4	6411.65
305	negative	N-Formylmethionine	0.6657	NA	NA	MS2 forward	176.039	193.758	3462.98	3782.7	4181.26	3266.7	4470.03	3693.14	3885.98	3525.71	4074.85	4013.69	4197.88	3880.87	4016	2888.79	3789.3	3671.57	3707.5	3989.66	1535.14	1727.69	3363.97	2493.66	3535.88	4270.4	1908.37	3854.42	2496.05	5395.61	6998.45	4763.71	4979.86	3575.5	2676.75	3643.53	2881.95	3794.54	3230.25	2430.51	3855.61	2903.55	7010.85
285	negative	Capric acid	0.985	NA	NA	MS2 forward	171.139	40.294	29763.3	32537.3	30293.5	35634.6	33786	29630.5	37731.2	35611.4	32020.3	31801.7	27724.3	29667.5	35111.3	156098	22345.5	15779	32856.5	18797.7	35457.4	9302.94	95278.3	16214	8368.54	28305.9	27110.1	24547.1	45687	35655.9	20160.8	25803	22958.6	59518.3	80099.6	12320.9	37746.3	24223.7	15491.8	11933.6	10385.1	11308.8	38469.4
467	negative	L-homocysteic acid	0.9739	NA	NA	MS2 reverse	199.036	155.352	30005	34717.3	29041.5	33731.3	29011.7	28735.7	31672.5	33265.9	35215.6	28961.2	26201.6	28481.5	35710.8	31548.6	40341.8	33165.8	32748.7	26251.9	24376.5	22061.7	37285.7	30510	25942.6	30323	29542.7	31623.1	27807	37839.1	51169.8	28953.2	31344.7	33704.2	22922	26148	20835.4	28311.4	43582	32354.8	33294.9	25853.8	29794
3926	negative	NA	NA	NA	NA	Unmapped	723.516	176.039	31861.6	33044.2	36784.8	41050.5	31058.9	34930.3	32247.1	39912.5	35622.2	32801.9	33303.6	42082.9	57975.9	49174.1	65210	36680.1	32827.3	37332.3	39985.4	41497.8	31293.9	52818.9	36088.6	37624.2	51854.8	35206.7	52470.8	35290.6	56668.3	42965.3	59481.2	45871.2	53365.9	51135.4	37553.2	60662.1	37966.2	36764.6	32175	35908.2	37970.7
3017	negative	NA	NA	NA	NA	Unmapped	535.468	38.7345	39131.2	39119.4	43650.2	50154.7	49572.8	48884.2	49635.8	43984.5	46572.5	40720.8	48166.2	56192	38777.3	18569.4	36623.9	78268	42514.3	32477	28537.9	57290.3	80751.5	105704	26161.7	33868.9	32750.1	22906.8	25293.5	27845.1	35550.9	49050.7	61597.3	11069.4	42390.8	53468.3	41777.6	26357.6	47333.2	45431.4	4831.4	58482.1	82194.7
2629	negative	NA	NA	NA	NA	Unmapped	483.01	32.4535	39948.7	44345.3	42049.7	31708.6	36420.3	39257.7	39088	38567.9	40858.2	36514.9	44706	202200	1400.68	41452.6	6267.97	2961.07	1628.17	83328.4	4858.15	10584.2	186983	866.582	100910	960.909	62327.5	1424.88	1952.14	32313.1	166346	3000.87	967.512	947.369	898.71	1684.36	73497.3	95390.4	672.755	654.319	34553.9	76719.7	3982.05
396	negative	NA	NA	Nitroxoline;4-Nitroquinoline N-oxide;4-Nitroquinoline 1-oxide;Nitrochin	14.1245552482753;14.3460932509542	MS1 mz matched	189.041	235.383	46819.8	57114.8	53997.5	55455.5	58268.2	59512.7	50460.6	50675.6	43994.4	48273.1	50143.2	64136.5	50715	35386.2	69252	28274.4	26489.7	50686.6	42629.4	25946.5	50853.6	33685.4	43256.8	59530.4	52455.2	36533.8	56112.7	46184.8	110382	38800.8	55657.1	46481.4	57100.2	47952	53504.2	54301.2	27654.8	17130.8	67119.2	33055.1	32925.8
3586	negative	NA	NA	Isorhamnetin 3-beta-laminaribioside;Rhamnetin 3-sophoroside;Sexangularetin 3-sophoroside;Ranupenin 3-rutinoside;Rhamnetin 3-laminaribioside;3-Methylquercetin 7-[galactosyl-(1-&gt;4)-glucoside];Dactylin;	11.3436480114747;11.3436480114747;11.3436480114747;11.3436480114747;11.3436480114747;11.3436480114747;11.3436480114747;	MS1 mz matched	639.551	37.741	9953.79	9215.86	8842.77	9059.69	11850.3	10532.9	9058.94	9384.11	10532.6	8926.12	9370.37	5137.01	631.896	1185.61	1218.19	3148.43	4781.08	3278.78	2016.58	2772.14	3512.69	1900.3	3125.04	2540.97	2305.26	2861.25	2538.35	908.661	5336.35	2257.9	1805.91	1346.11	1932.24	2972.77	3121.2	2259.03	6198.49	2821.02	1930.5	3406.63	1236.68
1382	negative	NA	NA	dCMP;dCMP;Deoxycytidylic acid;Deoxycytidine monophosphate;Deoxycytidylate;2'-Deoxycytidine 5'-monophosphate	19.7478033651902;19.8660248312399	MS1 mz matched	306.056	240.707	15457.2	19700.4	19334.8	21080.6	21306.5	21245.1	21909.3	22776.2	20990.5	19296.9	21313.5	17647.7	19690.6	15184.6	22337.9	18218.1	20226.1	19241	13048	13617.6	23550	14783.8	14166.3	20803.7	21382.1	20896.8	19799.7	20533.2	28862.5	16389.8	17486.3	15359.3	16862.3	18366.3	19458.9	13920.7	18196.7	16082.6	29327.6	13557.9	20580.1
187	negative	3-Phenylpropanoic acid	0.7542	NA	NA	MS2 forward	149.061	107.118	20225.2	19539.4	21160.1	19862.4	16379.1	21934.8	19268.8	19300.7	16804.1	17529	17123	18183	17065.2	16138.8	17208.9	19127.2	20116.1	19308.2	19365.9	16912.3	14675.5	16237.1	55801.8	16426.1	19361.9	21087.2	22514.3	21063.2	30208.2	30313.3	10254.4	27249.6	22533.3	21180.9	22541.5	17361	102501	20790	18709.5	15475.5	19564.3
2813	negative	NA	NA	NA	NA	Unmapped	507.274	30.5465	30758.7	31402.8	36110.7	30691.7	25344.2	26600.4	31508.6	29433.3	30697.9	27761.6	28858.6	36954.2	13124.6	27455.3	22329.8	26040.8	22255.3	41814	26042	20680.5	25961.8	28545.5	42075.1	40822.9	28699.3	36759.2	53160.8	20236.3	26958.4	37556.2	51129.1	38717.7	29311.7	23868.8	33418.1	23303.7	22684	17758.2	16720.4	30948.8	32405.8
2430	negative	NA	NA	NA	NA	Unmapped	452.009	349.191	63465.6	62339.5	57363.4	60155.6	56715.2	60421.5	57569.4	51984.7	56080.9	46023.6	49182.5	66387.9	58938.8	59185.8	49575.6	58056.8	67002.7	60083.3	50086.6	68400	53096.5	64137.6	64662.6	60303.4	60615	66274.2	62656.9	62536.9	55898.8	59280.2	62252.1	57767.8	63132	63555	63158	65453	56338.4	45608.5	63405.9	49840.9	59768.8
1398	negative	NA	NA	N-Acetyl-a-neuraminic acid;N-Acetylneuraminic acid;N-Acetylneuramite;N-Acetylneuraminic acid;5-Acetamido-3,5-dideoxy-D-glycero-D-galacto-2-nonulosonic acid;Neu5Ac;O-Acetylneuraminic acid;O-Acetylated sialic acid;N-Acetyl-alpha-neuramite;alpha-Neu5Ac;N-Acetyl-beta-neuramite;beta-Neu5Ac;N-Glycolylmuramic acid;2-Glycolylamido-3-O-[(R)-1-carboxyethyl]-2-deoxy-D-glucopyranose	-6.40945216361541;-6.40945216361541;-6.47027233379342;-6.47027233379342;-6.47027233379342;-6.47027233379342;-6.47027233379342	MS1 mz matched	308.097	294.863	206615	229282	246108	293828	239292	235779	248131	267346	256726	225743	227422	166860	187550	224354	202175	138334	210773	287655	251579	201165	176378	329624	234456	208599	163634	190486	295090	349560	142095	191889	122238	143731	312537	174023	330497	191869	306950	524560	288285	215547	256270
1020	negative	NA	NA	(E)-2-Propenyl [3-(2-propenylthio)-2-propenyl] sulfate;4,4'-Sulfonyldiphenol;Bisphenol S;1,1'-Sulfonylbis(4-hydroxybenzene)	-17.3988789686617;-3.99952005761219	MS1 mz matched	271.003	290.765	18739.9	22659.8	19399.3	16694.3	16900.9	17717.1	17507.5	18801.4	18664.6	20071.2	16491.8	16493.8	21236.8	27889.6	16699.1	16801.7	19690.2	21774.8	13802.3	16845.1	17392	17758.9	19218.5	15677	22795	18832.6	17696.4	18439.4	17382.8	21106	26851.3	12881.4	19423	18164.2	19737.5	17396.2	16623.2	16627.1	16584.3	19168.4	18132
289	negative	NA	NA	NA	NA	Unmapped	172.992	29.1855	536098	636718	545449	507264	470322	497128	537678	601375	539405	479213	486609	472046	30996.1	491112	282628	226488	830329	128168	951755	85059.9	47920.8	794575	476410	47504.5	82558.1	47607.1	70012.5	24537.5	54893.3	1109204	54232.3	297459	53636	59142.3	76891.4	232890	2422333	293567	109705	33211.2	71912.1
191	negative	Xanthine	0.9946	NA	NA	MS2 forward	151.027	214.802	25960.1	30448.1	32421.4	34257	34345.2	33795.2	38494.3	34523.9	32317.1	33993.3	36512.1	25789.3	48377.9	32418.2	24227.2	24356.7	22718.5	37779.5	32614.7	16524.2	21103.2	26253.7	34252.4	28164.3	38792.2	33106.5	33305.1	28232.3	52164.2	25373.9	90761.8	21556.1	37449.5	33173.4	31643.6	21158.4	22680.3	35549.2	23180.6	17856.7	51496.8
4430	negative	NA	NA	Halstoctacosanolide A	14.1009	MS1 mz matched	843.546	40.3	68613.6	61345.9	54734.6	71616.6	64703.3	63419.5	61458.8	55471.6	62710.4	52906.1	55348.1	64992.8	52949.3	60251.1	74018.8	53537.5	64362.5	61024.2	43566.4	51688.8	81292.6	46559.3	44264.4	35067.8	49188	38230.6	48401.1	85905.7	121865	50945.2	60820.3	40970	73550.2	49727.2	46770.9	49759.6	88469.2	55884	108422	43838.8	51454
1959	negative	NA	NA	NA	NA	Unmapped	383.01	163.994	9615.55	9654.46	9845.58	10689	9690.92	10580.1	8581.57	9127.97	10539.9	12065.3	8957.22	6940.06	11177.8	11211.8	7327.21	7607.09	8651.75	15217.7	9967.28	11661.2	8486.18	10974.1	13167	9073.29	10732.3	12494.3	12843.8	8877.28	10297.4	8950.89	11068.6	8574.44	10353.5	9628.79	9186.9	8085.11	8570.69	11589	7631.75	9005.88	8966.88
3073	negative	NA	NA	Physagulin C;	16.5419526367813;	MS1 mz matched	541.261	277.66	3811.91	4725.4	4360.75	5330.02	5208.23	5106.55	4285.09	4949.12	4692.55	5236.76	4620.02	7067.87	2107.81	2362.67	14863.6	8356.77	2772.01	2036.09	1193.6	2701.62	4901.78	1540.77	1417.39	2201.66	16676.5	716.986	4904.07	7684.02	15594.4	501.68	2825.59	2604.4	1044.75	2978.41	5588.63	3053.96	3029.89	2138.8	5610.07	8025.17	8596.48
4266	negative	NA	NA	NA	NA	Unmapped	806.978	349.036	14492.2	18676.6	16583.8	14830.8	18988.9	15528	18902.3	18959.7	17259.4	17954.7	18470.2	17286.9	17336.5	17993.8	14949.5	18067.2	16126.9	17491.4	21498.8	18010.7	17896.5	18207.4	18814.4	17478.8	19327.8	17376.5	20663.8	18686.6	18959.9	18716.6	19134.3	16797.2	17138.7	19921.5	17298.3	17043.9	20011.3	20019.5	16638.6	18467.1	18067
3770	negative	NA	NA	NA	NA	Unmapped	686.011	349.039	39691.4	42210.2	45430.4	47499.7	44213.1	45596.6	43980.4	40460.8	34522.1	38557.7	36264.8	46517.9	46249.6	46343.8	44206.1	37910.7	44954	43904.2	41158.9	44505.1	42615.5	45298.7	46626.5	43208.4	41552.7	48148.4	45028.6	51025.7	47350.8	49005.6	53256.5	43840.1	45261.5	48794.6	51963.7	43168.3	44234.2	34815	46107.4	32854.5	42855
4516	negative	NA	NA	NA	NA	Unmapped	864.569	40.3	50646.7	46095	37202.9	47935.8	45370.8	45630.8	41123.6	42724.9	44161.8	41774.4	36233.3	52051.5	22267.1	71033.2	40985	36532.7	27256.3	46108.6	30254.4	30953.4	35468.3	46028.5	40454.2	30275.3	43401.7	30174.3	48804.5	40705.5	18519.9	64270.1	21812.5	60440	54232.4	38281.9	36339.9	48946.4	56266.5	38836.1	41552.9	44924.5	45732.3
317	negative	Hippuric acid	0.9904	NA	NA	MS2 forward	178.051	189.715	27295.7	30064.4	31880.4	29129.2	31646.8	26548.4	27390.1	27361.2	35644.5	32878.3	27140.1	9761.55	11047.6	6412.33	107438	5227.5	29338.5	27917.6	9339.99	13532.3	17995.5	5352.6	35442.8	14737.8	42370.4	15487.8	97035.1	96673.4	14584.3	117807	85831.1	13196.9	3808.6	82994.1	32633.4	20343	78559.2	19841.3	57405.8	14793.7	4287.81
630	negative	NA	NA	Quinoclamin	-3.3815	MS1 mz matched	223.02	349.178	925836	943438	855665	897300	869823	811936	836148	711986	747882	741387	728623	843353	942086	896275	836460	773556	847236	794788	761242	1068300	792495	923693	906069	806927	740464	1020894	840540	938381	829982	793880	931148	800963	857257	968724	915065	825789	809875	703156	785549	692394	760705
346	negative	NA	NA	NA	NA	Unmapped	182.032	246.254	45607.7	53723	45867.2	54555.7	50418.6	60585.6	49724.6	45996.2	51756.3	48398.6	43298.4	46953.5	47398.5	59373.2	65872.5	57641.7	46318.7	35982.4	41939	30458.1	55325.5	45935.3	37296.1	36190.1	44907.9	40675.9	49835.8	46632.7	66150.9	45598.3	34769.8	58329.3	30344.9	39672.2	36652.6	42989.4	73355.8	57021.8	43750.6	21515	44960.7
2743	negative	NA	NA	Yuccaol A;Oxytetracycline hydrochloride;OTC	-5.74261069483401;-24.0491860014227	MS1 mz matched	495.113	164.051	5242.08	4345.66	4432.5	4528.65	4989.81	5148.65	4327.35	4092.98	4217.4	3774.32	4554.18	3341.91	11963.6	5668.26	2653.02	2417.43	3932.6	10032.7	3980.52	5519.95	4237.16	6613.93	6098.54	4809.53	4696.68	6243.72	7199.27	4339.61	5225.19	2984.29	5474.41	3720.96	7696.13	3248.2	2630.09	4286.4	5481.31	7904.13	2497.69	2123.67	4177.14
4576	negative	NA	NA	Elatoside E;Pitheduloside B;	15.4760745688175;15.4760745688175;	MS1 mz matched	881.511	185.64	31783.4	38072.4	37923.4	33751.3	33872.6	42460.2	39211.3	36814.1	35552.5	31158.8	31737.5	15561.8	78921.4	44880.5	22457.9	19628.3	27334.5	28178.2	21233.9	46688.7	14171.1	82628.3	33104.8	22722.5	31179.8	37906.9	40403.2	25713.7	13336.3	27798.4	21727	67648.6	40237.9	72160.8	16748.9	16991.2	37550.8	24385.9	16893.3	20587.5	62600.9
1306	negative	3'-O-methyladenosine	0.9993	NA	NA	MS2 reverse	297.137	366.516	7900.17	6806.96	7636.55	6933.49	7067.05	6308.87	6179.25	5717.41	6032.77	6866.16	6255.55	3835.57	11539.6	4073.04	4825.16	4130.4	5211.83	8641.56	14400.3	4833.26	6243.59	25513.2	6574.02	12727.4	2061.17	7847.67	14079.2	7687.08	3655.14	7705.43	16050.6	7340.3	10703	6796.39	7283.63	4340.21	28002.7	9377.24	5849.43	3421.29	12384.5
841	negative	NA	NA	(E)-2-Propenyl [3-(2-propenylthio)-2-propenyl] sulfate;4,4'-Sulfonyldiphenol;Bisphenol S;1,1'-Sulfonylbis(4-hydroxybenzene)	-17.3988789686617;-3.99952005761219	MS1 mz matched	249.021	290.897	5170.02	6285.11	5419.76	5692.85	6623.27	6597.8	6565.39	6664.13	6284.95	7043.75	5449.74	3860.97	9597.9	16282.4	4924.49	4679.5	4392.44	9388.84	2877.47	3078.34	3730.98	4408.24	6252.87	3310.23	8197.04	5914.06	6520.18	8293.05	6084.27	7123.92	20979.8	3491.31	13518.9	6733.14	6358.31	5453.16	5840.66	4400.23	197802	3681.78	6763.97
2400	negative	Glycochenodeoxycholate	0.9063	NA	NA	MS2 forward	448.304	200.968	502252	685273	699766	757644	733152	755183	715681	734534	683978	660530	715588	451307	219566	368309	1018651	870072	1383675	70785.6	256488	927867	287207	307510	118556	97179.5	306553	213006	986338	123170	128638	70464.4	84760.7	283225	584235	190068	171192	181960	33310.4	638037	106428	2574919	104918
2411	negative	NA	NA	NA	NA	Unmapped	449.359	105.158	98943.8	93557.6	109315	90201.7	84119.3	92102.4	92019.2	89728.4	74684.4	84068.4	81893.8	128764	58250.7	55993.2	186522	64875.2	98410.3	126071	155822	250495	101997	82702.3	93711.8	97208	60702.2	87785.5	95120.2	83114.3	134158	53037.7	80468	56175.3	116793	123327	97244.9	107335	172314	60851.9	89282.6	62491.1	114521
299	negative	N-Acetyl-L-aspartic acid	0.933	NA	NA	MS2 forward	174.041	385.187	4113.4	3717.73	4192.25	3541.57	4041.01	4816.69	4329.09	3825.49	3922.62	3695.13	3360.64	3343.12	3532.27	3127.74	3913.92	3410.66	3027.64	4261.06	3652.29	3207.92	8013.41	3104.33	2929.39	3633.47	4309.72	2973.19	3795.23	4689.06	4914.23	3001.69	5191.93	4890.41	3217.23	3343.8	3259.85	4139.95	3886.41	2822.42	4884.19	4727.18	3451.93
4923	negative	NA	NA	NA	NA	Unmapped	1036.79	39.683	30073	32080.3	27700.9	36980.1	30474	28557.6	30175.7	26493.3	31120.1	27188.5	26648.8	39294.4	23984.4	19428.3	28187	49038.2	29132.4	21725	30776.5	27075.5	32760.7	44501	24721.3	19166.7	28898.6	15604.6	19882.1	28794.7	24310.2	24640	34399.7	11736.5	28595.2	28065.5	35260.6	22561.8	27682.1	26759.5	7536.99	30176.4	35416.6
813	negative	NA	NA	3-Methyl-1-(2,4,6-trihydroxyphenyl)-1-butanone;Sinapyl alcohol;2'-Hydroxy-4',6'-dimethoxy-3'-methylacetophenone;Bancroftinone;3-(4-Hydroxy-3-methoxyphenyl)-2-methylpropionic acid;3,4-Dihydroxyphenylvaleric acid;5-(3',5')-Dihydroxyphenyl-gamma-valerolactone;2-Methoxy-3-(4-methoxyphenyl)propanoic acid;2-Methoxy-4-(4-methyl-1,3-dioxolan-2-yl)phenol;Phosphoagmatine;Agmatine phosphate	-10.5141049917077;-10.5141049917077;-10.5141049917077;-10.5141049917077;-10.5141049917077;-10.5141049917077;-10.5141049917077;-10.5141049917077;-10.5141049917077;-5.71188672191686	MS1 mz matched	245.048	27.817	123196	130408	118950	120973	100045	128092	112193	128407	95533.8	132150	126676	112866	43302.7	223880	19946.2	15110.7	34611.7	22230.3	217614	12085.1	22116.5	8026.01	18343.1	14418.6	138297	80359.1	15344.8	13050.6	385833	25137.3	7310.84	86942.3	1995.63	109008	29872.5	70248.2	377326	190255	1032347	260439	15641.2
3223	negative	NA	NA	Adouetine Y;Ceanothine E;Protoporphyrinogen IX;Protoporphyrinogen IX;Adouetine Y;Cretine A	12.0220665511264;12.0220665511264;12.0220665511264;11.9442904778748;11.9442904778748;11.9442904778748	MS1 mz matched	567.312	338.248	1727.41	1933.14	1740.44	1932.65	1911.48	1882.62	2453.31	2033.56	2153.46	1875.43	1875.79	8151.75	1800.3	3595.04	716.549	1324.7	2575.68	223.447	1050.95	908.583	325.434	2782.84	1563.16	388.622	2109.93	783.366	546.236	1054.06	1183.95	1234.1	642.816	325.648	698.788	6578.68	339.205	2176.24	2290.42	926.659	470.523	2201.45	958.595
2196	negative	1-Stearoyl-sn-glycerol	0.9993	NA	NA	MS2 reverse	417.319	35.321	249484	188946	175862	199480	200845	204897	194428	184101	225369	220053	221370	5837.7	5144.51	14658.9	18918	26168.1	16590	12818	27659.9	8735.19	16736.8	16319.9	12340.1	13880.9	10382.1	6758.95	13893.7	13072.9	8280.72	15274.4	14165.5	25423.8	6265.35	22748.5	5992.89	17599.2	8017.54	22741.5	8017.57	12155.7	8368.36
399	negative	5-Hydroxyindoleacetate	0.949	NA	NA	MS2 forward	190.051	257.335	3998.4	3816.07	4839.94	4690.4	4527.08	3332.67	4575.32	3914.74	4163.34	4012.98	4103.86	4015.69	3920.51	4153.61	5625.02	2850.7	3461.11	6428.59	2581.07	2617.83	5040.28	2352.66	3950.91	2983.38	6606.54	3800.98	5879.72	4173.13	5717.23	2694.73	2951.91	4518.46	3882.1	4871.02	5169.65	3176.2	3106.12	3198.21	4723.28	3359.28	4978.63
1000	negative	NA	NA	NA	NA	Unmapped	268.996	48.7545	23320.3	21107.6	29711.8	26989.3	23673.6	22732.7	26887.2	24514.8	21045.2	24532.2	24840.9	26167.3	26728.8	16445.4	28528.1	13811.5	14373.3	23670.4	21788.6	10133.7	25636.2	13499.9	16809.8	30227.8	23489.7	23153.9	33002.8	18524.7	65354.4	17313.3	18347.8	22010	20809.5	22365.6	21041.8	21011.9	9741.72	10411.8	35078.2	18076.3	15937.9
332	negative	L-Tyrosine	0.9631	NA	NA	MS2 forward	180.066	296.554	51575.3	55334.6	53870.3	49760.4	55813.9	60028.8	62089	68950.5	49875.3	51483.3	60107.8	55751.4	95704.4	45762.3	46258.5	35122.8	42632.8	94346.7	62388.7	38640.2	38856.3	58982.5	72697.5	67747.6	42742.1	49860	55506.3	42505.8	46651	45936.7	71758.5	58584.6	71656.3	54407.2	63003.7	73413.8	82517.3	128796	81200.3	34228	73474.6
312	negative	L-Gulonic gamma-lactone	0.8728	NA	NA	MS2 forward	177.041	302.724	6230.63	6987.85	7072.72	7444.44	6763.06	5873.82	6654.14	7577.59	8499.85	6250.46	7366.97	6907.77	4775.86	7005.56	7422.13	7142.69	6791.26	5316.18	6608.09	6775.26	5853.76	9497.84	4316.86	8501.4	3288.86	6112.27	8051.18	6888.77	6822.47	6875.82	6528.07	5388.36	9689.76	5376.33	8038.57	5249.65	6622.95	11402.7	12422.9	8405.21	4634.98
3002	negative	NA	NA	NA	NA	Unmapped	533.452	38.99	17098.6	19076.1	22149.5	21086.2	21664.1	20079.5	24932.3	24638.4	20956.8	20051.4	21508.8	16628.3	22784.7	14007.8	23233.2	37565.2	24675.8	19805.5	28387.8	37835.5	35008.8	33459.6	18393.4	26117.5	14649.1	16620.5	14387.4	10172.5	18381.9	25992.9	23677.1	13259.1	17733.4	26975.3	17835.2	20172.2	27728.1	14917.9	7265.86	25933.4	23841.6
3331	negative	NA	NA	NA	NA	Unmapped	589.227	286.639	3836.72	3485.72	4355.85	3909.48	3518.35	3558.96	4086.57	3757.38	2827.73	3588.71	3532.94	5743.91	440.614	1216.5	18650.1	3557.08	10933.1	1797.47	1393.91	2086.99	652.792	1292.74	924.494	2423.73	9667.36	852.862	3615.12	3729.24	13345.8	354.688	1339.52	781.988	907.018	3006.13	1902.69	2827.46	3464.75	1015.39	2241.96	1687.13	14966.2
1379	negative	NA	NA	2-(3,4-Dihydroxybenzoyloxy)-4,6-dihydroxybenzoate;Oxandrolone;3alpha,11beta-Dihydroxy-5beta-androstane-17-one;11beta-Hydroxyetiocholanolone;3alpha,11beta-Dihydroxy-5alpha-androstane-17-one;11beta-Hydroxyandrosterone;Androst-5-ene-3beta,17beta,19-triol;3beta-Hydroxy-D-homo-17a-oxa-5alpha-androstan-17-one;Isoandrololactone;Dihydromocolin L	-1.30623163932488;14.6953410870545;14.6953410870545;14.6953410870545;14.6953410870545;14.6953410870545;14.6953410870545	MS1 mz matched	305.213	31.806	12386.7	9972.66	11374.9	11038.2	12295.3	10435.5	11138.3	13871.3	13395.6	12977.9	10972	21074.7	17079.3	140270	22411.7	189602	18911.5	146471	68843.3	19048.8	52417.8	48705.9	8894.02	87419.6	17725.5	38852.4	133551	14866.6	452815	74299.9	96516.9	53075	52395.5	14628.3	11701.7	70414	58203.6	521364	2506.5	961576	8718.98
415	negative	D-Glucuronate	0.9791	NA	NA	MS2 forward	193.035	381.176	10745.7	10107.5	9936.75	10418.1	11185.5	9888.48	10119	11248.8	12214.3	10731.6	13777.2	17435.2	10290.3	8211.27	10508.3	10716.4	9232.7	30443	7251.21	6642.13	11160.3	6123.47	5999.93	8198.46	19370.7	8094.16	7097.02	11464.7	11378.8	8663.97	12597	6028.84	5674.26	11138.6	7822.08	10080.2	6012.74	10560.1	9265.43	74347.7	7496.5
4609	negative	NA	NA	NA	NA	Unmapped	888.555	185.531	19400.3	25512	24710.4	24117.3	20604.6	25177.6	23641.8	26034.4	21589.1	19482.8	21480.7	10273.7	26414	18511.8	8253.02	10024.6	26388.9	13979.6	10153.4	26276.8	9988.9	43034.9	26404.7	24750.2	15104.9	36631.7	21443.1	12069.4	5383.84	14381.7	30803.6	14133.1	32506.7	23250.2	11381.8	19698.9	33511.4	16684.4	9288.62	10711.1	30710.5
42	negative	Uracil	0.9957	NA	NA	MS2 forward	111.021	92.3985	12064.8	14178	16312.9	13037.2	13694.1	17462.1	13622.2	13088.3	14248.7	13872	13599.8	8970.04	38294.6	7933.06	6681.37	11059.8	8104.62	12607.8	6614.62	7872.79	6066.53	9442.05	18919.5	6854.89	33354	17037.4	11100.2	11545	27398.8	10293.9	41102.9	6530.83	16930.6	11144.8	6344.93	7155.61	10172.3	13166.5	8509.56	7637.71	9342.83
3981	negative	NA	NA	2,2',3,4,4',5',6-Heptabromodiphenyl ether;	4.15236407918428;	MS1 mz matched	738.502	39.061	33499.3	31917.2	26430.7	32358.3	30467	29682.2	28152.9	27216.8	28515.3	24580.7	24031.3	13136	19403	34719.3	25830	28905.6	29888.7	22294.1	24534.7	31760.3	21037.3	29087.9	31290.3	28697.7	25458.2	32024.3	32900.6	27346.6	10665.5	24232.2	21126.9	28485.2	29331	45371.2	29221.6	45813.9	24380.1	26719.4	17181.9	20280	24292.3
2488	negative	NA	NA	Kaempferol 3-glucuronide;3-Methylellagic acid 8-rhamnoside;	-3.01085473589934;-3.01085473589934;	MS1 mz matched	461.359	37.7205	11595.8	9892.56	10799.1	15034.1	11745.2	12732.1	12528.1	12309.1	13311.7	12125.2	12055	6633.84	2554.46	7004.39	16694.1	12660.1	12698.6	7352.48	11979.1	10306.3	32240	9683.13	12651	23051.4	11614.5	11285.8	9568.01	15060.9	1964.67	8517.22	23377.2	7182.3	12439.5	28171.4	10882.8	17346.5	9447.67	20337.4	4850.86	29211.9	7880.84
620	negative	N-Acetyl-L-tyrosine	0.9931	NA	NA	MS2 forward	222.076	215.213	1629.32	2089.6	2460.61	2478.78	2364.37	2195.43	2338.85	2456.97	2155.21	2381.26	2354.39	424.747	413.495	398.707	1247	368.974	267.018	392.635	267.981	371.159	568.991	356.019	296.511	419.535	844.312	247.423	477.978	1138.47	405.057	286.455	673.298	481.206	642.681	415.014	394.753	397.996	253.525	363.061	1141.26	528.316	4060.56
4667	negative	NA	NA	PI(18:0/22:6(4Z,7Z,10Z,13Z,16Z,19Z));PI(22:6(4Z,7Z,10Z,13Z,16Z,19Z)/18:0);PI(20:3(8Z,11Z,14Z)/20:3(8Z,11Z,14Z));PI(22:3(10Z,13Z,16Z)/18:3(9Z,12Z,15Z));PI(22:3(10Z,13Z,16Z)/18:3(6Z,9Z,12Z));PI(18:3(9Z,12Z,15Z)/22:3(10Z,13Z,16Z));PI(20:3(8Z,11Z,14Z)/20:3(5Z,8Z,11Z));PI(20:3(5Z,8Z,11Z)/20:3(5Z,8Z,11Z));PI(18:3(6Z,9Z,12Z)/22:3(10Z,13Z,16Z));PI(20:3(5Z,8Z,11Z)/20:3(8Z,11Z,14Z));Bacteriochlorophyll a	-18.1942455524778;-18.1942455524778;-18.1942455524778;-18.1942455524778;-18.1942455524778;-18.1942455524778;-18.1942455524778;-18.1942455524778;-18.1942455524778;-18.1942455524778;-5.86197796284805	MS1 mz matched	909.541	184.187	22431.2	23996.7	31557.7	30194.7	24446.8	28510.9	29771.1	30791	28482.6	26008.1	27892.3	9805.07	30745.9	25863.8	13758.3	15071	25873.7	23977.8	11420	25008.2	8558.51	66788.9	27218.6	19172.1	24985.6	39495.2	36103.8	17417.5	6699.52	22690.8	25252.4	46163.1	26523.9	45407.8	12026.6	20039.3	27656.9	18589.1	14199.4	15406.4	60069.3
3931	negative	NA	NA	PC(14:1(9Z)/18:3(6Z,9Z,12Z));PC(18:3(6Z,9Z,12Z)/14:1(9Z));PC(18:3(9Z,12Z,15Z)/14:1(9Z));PE(15:0/20:4(5Z,8Z,11Z,14Z));PE(20:4(5Z,8Z,11Z,14Z)/15:0);PE(20:4(8Z,11Z,14Z,17Z)/15:0);PC(14:1(9Z)/18:3(9Z,12Z,15Z));PC(14:0/18:4(6Z,9Z,12Z,15Z));PE(15:0/20:4(8Z,11Z,14Z,17Z));PC(18:4(6Z,9Z,12Z,15Z)/14:0);	1.70005783943195;1.70005783943195;1.70005783943195;1.70005783943195;1.70005783943195;1.70005783943195;1.70005783943195;1.70005783943195;1.70005783943195;1.70005783943195;	MS1 mz matched	724.976	349.013	14779.5	16808.9	15280.3	20155	15672.6	16815.8	18897.4	15223.4	18105.2	16393.5	19669.5	18760.2	16064.3	17683	16690.3	20582.5	19373.9	18426.5	18984.9	15592.2	20060.5	15735.3	18933.8	19501.3	18930.8	11216	14808.9	20814.1	19436.3	18698.9	19939.5	18619.3	16526.8	16788	17104	17180.8	18700.3	20020.9	18285.3	17709.8	18562.3
3733	negative	NA	NA	Jesaconitine	-3.70192	MS1 mz matched	674.315	306.113	2150.45	2012.44	2378.49	2000.76	2396.58	2606.6	2107.43	2042.98	1920.86	2473.73	2552.25	5009.49	165.37	481.092	1877.72	2148.08	1502.22	352.915	1255.21	1156.02	247.862	699.071	286.616	685.381	11247.2	1180.67	549.227	1148.5	1673.82	821.913	251.282	154.116	333.661	553.447	1434.82	427.82	146.002	998.056	1139.78	15714.1	803.491
474	negative	Cysteine-S-sulfate	0.994	NA	NA	MS2 forward	199.969	302.063	12024.6	15047	16452.5	17069.5	16555	17143.4	17085	17541.9	18669.6	17226.9	18653.9	9556.76	6280.67	15196.3	28847.9	17866.2	17403.7	12984.5	15032.1	14697.8	34808.7	22308	11119.6	25968.6	17077.2	15591.7	22109.2	19213.8	27525.3	26390.8	18950	31303.6	11775.9	14015.9	22728.8	13375.7	5973.85	23544.6	38284.2	15515.5	15338.7
2888	negative	NA	NA	Ganoderic acid delta;Ganoderenic acid C;Ganoderic acid epsilon;Ganoderic acid B;Cucurbitacin D;Ganoderic acid A;L-Olivosyl-oleandolide	-16.2799889641929;-16.2799889641929;-16.2799889641929;-16.2799889641929;-16.2799889641929;-16.2799889641929;13.3612012084387	MS1 mz matched	515.3	35.728	61113.5	57345.7	59268	56392	57422.1	54225.2	50661.6	72504.1	57602.6	52354.9	49030.1	36466.4	17138.9	34792.4	47538.3	52095.3	41537.3	27022.2	17078.8	29905.5	32565	21342.2	10399.7	47143.1	56243.4	44643.6	108208	21551.8	15040.7	14737.2	13986.5	23964.4	169925	8365.17	85817.6	23157.5	2964.96	44451.4	16667.4	312069	19276.4
4498	negative	NA	NA	NA	NA	Unmapped	860.475	57.91	55208.2	48247.5	39515	46754.2	45587.8	53115.4	47371.9	43498.6	50781	38314.1	46162.5	33235.5	46133.2	43717.2	40366.7	34448.6	28967.6	51752.8	34842.1	41949.9	24373.7	49703.5	62732.3	29002.5	50398.6	42817.8	43500.9	53475.4	67075.7	73627.8	51114.1	51067.3	79245.2	34388.9	61280.9	46602.4	35450.5	47808.6	47800	33575	62654
4031	negative	NA	NA	NA	NA	Unmapped	746.506	39.061	33219.9	30008.5	32512.9	32828.7	30855.7	28736.2	25572.7	25726.2	29805.1	25801.7	24486	13578.2	11120.4	35316.8	19234.4	18953.9	22702	24836.6	14186.5	24778.9	14376	33771.1	19709.5	25077.1	18943.3	28957.3	30138.7	34090.2	7070.45	23148.6	17402.9	27900.1	53732.2	21221.1	13603.9	31363.2	30530.3	21490.6	22541	23095.8	71455.9
4449	negative	NA	NA	PG(18:0/22:4(7Z,10Z,13Z,16Z));	-11.3546014430425;	MS1 mz matched	847.528	188.51	4650.89	4788.11	5391.65	4202.97	4144.81	4207.54	4021.88	5026	4646.56	4473.88	3634.64	1807.35	12942.7	4809.83	1206.66	2661.67	4036.44	3216.6	3142.47	5161.58	1216.61	7208.69	7163.2	1944.94	3582.03	3262.37	3690.66	2357.7	1119.93	2388.58	6808.53	4919.73	5559.53	7638.77	2039.81	5385.9	3215.9	4700.02	1773.27	632.61	6607.27
2565	negative	NA	NA	Sildenafil;Sildefil	19.4848250797412;19.5358588660161	MS1 mz matched	473.214	36.391	20092.8	15955.9	14880.7	18032.1	15149.5	14485.2	15717.5	17680.4	18848.8	19028.5	16890.6	6663.21	2844.46	9499.63	6030.3	8154.33	13555.9	8185.52	17045.4	7386.97	6595.79	7720.45	7973.49	22164.7	14137.5	10563.4	21646.2	12776	5540.73	40095.1	18767.5	12442.4	5973.97	23703.6	28003.6	27868.3	4210.59	13765.6	10016.2	10597.6	11148.4
1373	negative	NA	NA	NA	NA	Unmapped	305.022	349.07	3268111	3242117	3108062	3060136	2910717	2753320	2817837	2384351	2582729	2487397	2495390	2649770	3281244	2944062	2811296	2583992	2882615	2732619	2276824	3639566	2629985	3134853	3066236	2737398	2370114	3423118	3030903	3073800	2805274	2834285	3052622	2716356	3392846	3326572	3199879	2596522	2716317	2275184	2539871	2299397	2701084
1355	negative	N-Acetylaspartylglutamate (NAAG)	0.9846	NA	NA	MS2 forward	303.082	434.746	1530.69	1408.75	1097.29	1496.61	1460.96	1388.99	1532.22	1459.63	1673.48	1385.91	1200.31	1411.94	1567.5	1489.03	1464.71	1118.43	1137.82	1579.32	1751.49	1752.91	2404.77	1320.74	1415.4	1700.47	1010.02	1240.82	1025.65	3062.53	1496.88	1685.94	1631.02	1425.16	1217.18	1194.81	1736.6	1677.93	801.14	1039.15	1911.03	1000.43	1591.27
2099	negative	Galactinol	0.7072	NA	NA	MS2 forward	401.126	360.212	3317.51	3343.36	3286.54	3941.1	3589.74	3034.65	3090.91	2870.26	3046.94	2594.12	3096.72	16344.6	3126.12	6159.61	8086.38	1375.28	1994.21	4013.48	2118.53	3041.33	6707.91	2783.96	1207.21	1141.51	1977.12	1431.37	2376.29	16173.1	28773.3	8037.93	5379.1	1437.4	929.662	2201.55	1401.92	861.506	847.626	4348.72	2370.76	4319.52	1709.35
2341	negative	NA	NA	Hexamethylquercetagetin;3,3',4',5,7,8-Hexamethoxyflavone;Chrysaloin;Nobiletin;3,3',4',5,6,8-Hexamethoxyflavone;Saphemycin	-18.5702950397325;-18.5702950397325;-18.5702950397325;-18.5702950397325;-18.5702950397325;5.96834390399031	MS1 mz matched	439.066	29.582	21020.8	24036	22736.3	18745.1	22427.2	19887.4	17571.1	19775.5	17999	18769.8	17365.6	48865.1	2619.53	8546.45	7300.62	15080.7	42921.8	1851.63	21485.8	4570.84	4029.81	10754	4850.24	12052.5	6590.2	5430.51	12301.8	62800.7	4366.67	20430.7	4841.66	5665.07	8345.18	42621.2	1018.3	4271.22	24039.6	15277.1	7468.16	18368.3	8702.78
3033	negative	NA	NA	Terpendole J	-2.11005	MS1 mz matched	537.321	30.9235	39717.7	39014.6	38786.6	35496.2	37707.8	34010.9	35791.8	26831.1	31866.1	34664.8	30980.2	30573	14633	23535.3	30825.6	43544.7	48111.8	36499.3	28312.4	45141.6	49906.4	49416.6	43747.6	44307.7	51468.1	63087.9	34960.3	17551.2	29225.7	29275.1	39209	21766.8	48993.3	31787.8	22467.3	29258.9	19729.3	19320.2	25642.7	54785.2	33005
267	negative	Uric acid	0.9934	NA	NA	MS2 forward	167.022	323.76	65246.4	65343.1	65305.6	57924.8	63601.7	50006.4	55986.4	57650.3	50289.9	53596.4	48776.8	55603	92246.7	79269.9	86893.9	99718.6	35795.7	42390.9	34433.6	13297.5	102472	58379.2	38548.3	33431.9	60071.1	48982.9	38495	77896.6	186833	52750.7	66318.6	84190.7	24215.1	48746.5	32372.9	45596.6	154910	101406	56906.8	35453.7	62025.2
924	negative	O-Phospho-L-threonine	0.783	NA	NA	MS2 reverse	258.043	33.1005	10063.2	11379.2	9481.04	12962.4	10232.5	11920.3	13269.3	13067.7	11965.3	11718.5	10432.9	6348.05	15893.9	6283.82	5859.63	4755.78	68881.8	7755.6	7722.99	106701	4778.57	9526.45	2234.51	4274.21	5354.2	6864.71	12261.1	12209	19132.7	8614.98	43964.3	145782	5293.31	4155.7	4965.65	2000.79	6924.14	12102.9	8692.71	8183.86	51006.6
4762	negative	NA	NA	PC(24:0/22:2(13Z,16Z));PC(22:2(13Z,16Z)/24:0);PC(24:1(15Z)/22:1(13Z));PC(22:1(13Z)/24:1(15Z));	-13.9949237035503;-13.9949237035503;-13.9949237035503;-13.9949237035503;	MS1 mz matched	962.678	39.7075	19684.8	23459	16780.6	22094.3	22487.6	23860.3	22277.5	21306.6	21163.1	24583.3	17928.2	10013.2	70.2646	346.215	35701.2	15871.9	6892.55	638.253	0	10289.7	49685.4	142.407	0	46107.1	41430.1	10550.7	15981.7	36361.5	411.916	5724.19	40134.8	1509.25	544.19	65023.9	21537.4	43087	305.643	326.367	14445.5	60567.7	705.583
2293	negative	NA	NA	Diphenhydramine N-glucuronide;Inflexin;3beta,11beta-Diacetoxy-1alpha-hydroxykaura-16-ene-6,15-dione;Grandisin;Magnosalicin;Schizandrin	11.5080387972265;-17.5813044810242;-17.5813044810242;-17.5813044810242;-17.5813044810242	MS1 mz matched	431.207	63.201	169455	177689	190077	122582	194379	179162	170336	186097	185892	194502	169791	450926	9840.49	23622.3	1189161	497424	262032	33630.9	3350.75	18949.8	54931.9	25190.4	13015.9	38776.2	590251	12773.5	61511.5	198524	218323	7543.48	23965.8	17281	45958.2	8514.67	16012.9	29485.8	14099.2	17047.9	73110.5	82549.8	150772
2659	negative	NA	NA	NA	NA	Unmapped	486.212	30.698	14516.9	19363.2	19019.1	17598.5	15554.2	17339.3	15857.8	21225.9	18442.2	17336.2	15560.2	32614.3	2100.56	6275.28	123335	30840	18952.6	26565	4167.29	8385.07	35901.6	2450.08	7481.34	21028.4	34174.3	6834.54	34666.1	60835.3	35750.1	3492.79	23798.3	5035.46	31044.2	9505.14	8976.35	6642.01	8035.11	5286.9	26832.1	14494.1	24879.9
3146	negative	NA	NA	Cucurbitacin E	-15.795	MS1 mz matched	555.295	33.7515	15498	16447.6	16922.5	17802.9	14714.5	14295.5	18104.4	16922.6	16377.9	11752	15026.9	12907.4	11534.2	13387.5	21249.3	11885.9	22220.2	20919.3	5999.91	62831.5	33022.4	56237.8	4149.32	9385.88	43332.8	29172.2	20266.4	40758.9	11712.3	16908.5	7312.87	12613.7	20743.4	11485	19066.9	29405.5	6227.03	4942.88	12956.6	20592.5	16519.3
1987	negative	NA	NA	NA	NA	Unmapped	387.023	349.048	4260385	4216072	3841843	3935737	3630064	3468663	3590038	3297788	3247901	3121641	3067883	3236750	4192055	3959153	3599450	3189291	4261616	3317092	2826742	4547860	3278850	4010256	4084470	2907661	3129491	4619425	3848955	3892694	3527885	3306828	4001258	3480457	4469700	4190237	4095907	3391601	3473048	2930707	3189568	2831141	3426480
4533	negative	NA	NA	NA	NA	Unmapped	868.598	40.306	28600.3	28673.3	23050.2	30810.1	25869.5	26181.5	25204.5	24054	24637.8	21257.2	22104.7	23115	18174.7	28023.6	19771.7	17758.3	27488.2	27895.6	18611.8	18630.7	15586	19971.5	25845.4	17745.8	13041.4	14143.7	13497.8	30165.6	8696.72	21169.5	24793.7	18300	27575.9	18931.1	10970.1	30307.1	35898.9	22318.8	19130.6	17834.3	27733.3
3641	negative	NA	NA	NA	NA	Unmapped	650.202	32.4085	11711.5	14559.7	15741	15154.3	14638.6	12074.8	12771.4	10822.1	12606.3	13093.3	13310.6	17712	753.957	3918.55	9915.84	2345.91	2107.9	21175.8	1644.43	5120.86	20977.3	561.318	5876.19	404.022	18360.3	562.561	2139.7	10908.3	17551.1	1117.93	1104.3	1575.18	1599.42	1188.72	12396	5545.02	983.373	843.274	11686.3	9285.95	7616.46
3274	negative	NA	NA	Anhydroamarouciaxanthin B;Asparagoside A;(25S)-5beta-Spirostan-3beta-ol 3-O-beta-D-glucoside;Timosaponin A-I	0.00778040576857788;-10.2008724685142;-10.2008724685142	MS1 mz matched	577.369	175.231	51886.3	51876.7	53753.2	54859.6	44890.7	50604.3	46114.2	52297.8	36215.8	42437.3	48718.1	50025.4	16196.8	14158.1	63333	40388.8	55164.5	18167.9	26361.1	16201.2	23879.6	19857.8	21158.2	21556	61858.7	24592.7	12759.7	30269.3	35172.9	15930.6	11300.8	11773.4	31678.5	26416.3	16452.1	23396.9	14161.8	11636.8	32175.8	202084	46042.9
2705	negative	NA	NA	NA	NA	Unmapped	491.279	28.393	51099.5	71373.8	64254.1	55526.1	69254.7	68367.6	66064.1	64953.8	67720	68446.2	51019.2	86307.4	40055.7	70865.8	58323	75246.7	32259.2	81089.1	37556.6	29154.8	43963	70387.8	132410	72700.9	58448	61003.3	129213	30274.7	53878.4	76071.1	136079	124558	33307.6	57682.4	94563.8	60762.5	33084.8	58942	24781.5	54919.9	37874.7
692	negative	NA	NA	NA	NA	Unmapped	231.023	389.284	6755.58	5783.77	7725.45	5976.37	5965.05	5416.97	5453.85	5557.47	6859.89	5897.53	5823.25	3676.51	15680.1	5092.86	2358.24	2991.54	6811.42	11641.6	6126.59	3113.39	4527.54	8753.92	9568.93	6047.78	11081.4	4503.99	7654.17	5302.8	3599.86	4240.95	14717.3	3041.47	10685.6	10022.6	5627.94	4303.25	4880.79	7643.33	3880.38	2882.95	8446.78
4137	negative	NA	NA	PE(22:6(4Z,7Z,10Z,13Z,16Z,19Z)/P-18:1(11Z));PE(P-18:1(11Z)/22:6(4Z,7Z,10Z,13Z,16Z,19Z));PE(22:6(4Z,7Z,10Z,13Z,16Z,19Z)/P-18:1(9Z));PE(P-18:1(9Z)/22:6(4Z,7Z,10Z,13Z,16Z,19Z));	-16.8034855561634;-16.8034855561634;-16.8034855561634;-16.8034855561634;	MS1 mz matched	772.523	136.57	34848.2	38782.2	32975.6	38519.8	40587	33257.8	36776	38132.1	42725.4	32905.9	27913.9	21687.8	24575	33833.3	22777.7	25824.4	25206.2	16073	11074	40432.5	28375.1	34543.1	22340	32098.5	29172	32778.2	39123.3	58796.5	17915	20459.9	16377.2	29687.5	70288.7	23119.8	27392.6	42803.7	35983.8	28656	40283.8	37875.9	98855.6
3004	negative	NA	NA	Glyburide;	-22.2670261779745;	MS1 mz matched	534.011	349.252	57806.2	59459.9	47010.8	51030.8	42353.5	53978	49505	46291.2	45545.5	43218.6	44858.5	50855.6	54945.3	58288.7	50477.5	48749.1	56037.2	45380.7	42739.6	62491.7	44584.7	55135.9	56173.9	53702.3	48650.7	62032.2	53878.9	50876	52878.6	44564.9	53232.3	51480.3	59859.9	59766.9	65560	49491	46378.2	38600.2	53347.6	38302.8	46974.9
185	negative	D-Xylulose	0.754	NA	NA	MS2 forward	149.046	301.208	22688.9	20925.7	22930.5	16488.5	19968.8	21624.2	21989	22249.9	15987.6	22023	22859.2	18200.4	8095.9	16170.6	42425.1	11450.3	22070.6	11686	15614.4	22730.1	14978.4	15482.5	12245.4	23952.2	10475	21127.4	21172.7	20124.3	21250.2	22085.6	12957.7	10466	17418.7	9055.56	27591.8	14190	23487.2	27431.4	33768.2	18952.7	16484
212	negative	Allantoin	0.9779	NA	NA	MS2 forward	157.037	185.421	20665	25686.9	21982.1	22698	28018.9	20340.5	21311.4	23600.6	20315.7	22324.6	18837.5	7224.86	36021.2	6170.39	14051.1	13638.4	14171.6	6418.46	39735	7818.91	5179.2	2990.4	9197.54	18170.1	33542.1	46467	19179	13611.2	16684.5	11921	35785.2	12396.5	51762.2	9607.64	24134	34569.7	5854.98	23804.4	25412.2	8576.1	6332.37
3141	negative	NA	NA	NA	NA	Unmapped	555.02	28.569	13563.8	16124.7	12656.3	15147	14113.1	14626.8	13326	14770.4	19292.9	14901.3	14895	24844.1	1599.79	7976.52	227.072	11132.8	15749.3	184.757	27869.2	19313.2	1730.31	32255.1	2945.4	507.533	931.991	14160.8	0	40929.3	1627.41	15325.2	2169.19	4430.82	3946.24	21888.9	2102.95	6223.18	19245.5	5992.93	3182.48	7330.07	228.899
1922	negative	NA	NA	Gonyautoxin V;Gonyautoxin 5;Gonyautoxin V;GTX5;Toxin B1	5.10246857697831;5.14625775868351	MS1 mz matched	378.093	301.105	17653.8	15273.8	14655.2	14462	11979.3	13499.3	12165.8	13795.8	15575.4	14399.7	12440.5	22368.1	7256.7	17342.2	16794.7	14422.8	19547.7	13828.3	11847.8	21736.1	12967.6	14356	8670.02	21045.6	8649.54	18579	22438.9	16518.2	6675.6	13186.8	3926.04	16090.4	23720.3	9065.04	24959.9	14756.7	16892.2	17529.6	28273.5	13053	12751.2
2407	negative	NA	NA	Laserpitin	0.444186	MS1 mz matched	449.25	180.075	19403	27449.4	20525.8	23346.9	22166.4	23444.3	21445.6	21527.4	19411.3	19702.9	18496	21442.8	4559.04	6226.59	58349.8	59087.5	29022.9	6476.86	5079.46	11426.8	3312.07	3332.91	4466.36	6072.23	49271.2	11736.3	9541.82	13734.5	52203	16983.7	7256.9	6834.06	2395.9	15722.4	12382.6	8962.67	348708	5907.31	4742.36	13789.8	7432.4
196	negative	Creatine	0.7591	NA	NA	MS2 reverse	152.045	341.935	1636.07	2138.3	1924.27	2014.77	1823.27	1626.95	1794.45	1651.16	1494.45	1502.52	1653.62	1565.19	3549.04	1786.94	1426.53	3013.63	2127.42	1084.46	1464.66	1199.34	754.308	2175.92	2692.04	1667.65	1739.86	1606.32	1414.88	1564.14	2307.2	944.381	1472.21	953.189	2890.44	1594.48	1574.1	1835	898.119	3243.56	780.783	1543.62	821.382
1145	negative	NA	NA	DTP;(2,4-Dichlorophenyl)(5-hydroxy-1,3-dimethyl-1H-pyrazol-4-yl)methanone;4-(2,4-Dichlorobenzoyl)-1,3-dimethyl-5-hydroxypyrazole	0.352098	MS1 mz matched	283.009	234.74	13807.2	10454.9	10683.2	12650.4	11508.1	12770.1	8742.33	11185.9	10963	10826.2	11535	14301.3	12151.8	10233	16967.2	15668.3	13115.2	11746.6	15680.4	14353	13752.8	12777.9	14145.1	14795.9	13326.5	12703.8	12712.2	12329.9	12876	13345.2	13057.9	13741.4	15151.7	14832.4	11135	14159.3	14416.3	13893.8	13158.6	7821.73	14299.5
1685	negative	Trehalose	0.9605	NA	NA	MS2 forward	341.106	360.084	5133.67	5816.1	4978.32	6185.64	5949.45	5259.73	4906.68	3841.4	5145.6	5123	5376.86	25310.2	3952.4	8717.7	14163.7	1855.09	2925.67	6838.78	3061.28	5025.79	11026.3	3663.35	2261.21	1954.84	3458.43	2455.82	3733.87	24767.7	49585.5	11303.1	8560.52	2068.31	1485.94	3110.11	2156.7	1323.12	1279.56	6955.69	7341.57	6778.55	2281.25
3854	negative	NA	NA	Adenosine thiamine diphosphate;	-14.8249177216932;	MS1 mz matched	709.5	176.863	84497.8	86476.9	95176.8	107063	86852.6	88114.1	80956.8	115056	83511.5	100072	84777.9	99869.6	145959	95700.7	162823	103334	60868.7	193238	95554.5	74615	135204	98673.5	71942.1	187853	196305	168418	216387	129318	170287	113151	170709	132000	250072	88745.8	132369	127968	153048	87262.8	117471	93973.4	159394
1263	negative	NA	NA	Norfluoxetine;Mecambrine;(+)-Mecambroline;Pukateine;Xylopine;Japonine	-2.23537401500821;-10.3716850861747;-10.3716850861747;-10.3716850861747;-10.3716850861747;-10.3716850861747	MS1 mz matched	294.118	304.85	7135.3	7114.76	6432.94	6902.7	7023.29	7762.24	5900.65	6314.07	7598.55	6346.59	4979.2	6360.9	5413.1	6770.66	4818.66	2906.92	9092.82	5798.48	5195.48	7168.92	5603	8020.15	3420.23	13334.6	2402.6	9331.4	9295.24	7617.74	3347.29	5171.99	2076.51	5990.42	14820.6	3781.68	12221.1	6807.81	12097.3	13590	9887.87	3088.15	5354.34
1743	negative	NA	NA	9-(beta-D-Ribofuranosyl)zeatin;O-beta-D-Xylosylzeatin;O-beta-D-Xyloxylzeatin;trans-Zeatin riboside;cis-Zeatin riboside	2.08227569740288;1.99342568208567;1.99342568208567;1.99342568208567	MS1 mz matched	350.148	170.559	17191.3	20428.9	19058	16427.1	17415.5	18394	15414.7	15445	15502.3	15035.7	13566.4	13060.4	3387.51	15533	17494	23058.4	11865.2	4004.77	38974.1	13163.7	27039	27028	10592.5	28913.8	5520.44	16813.6	18655	12193.3	2351.08	36097.4	4839.97	24235.5	39516.1	7395.93	16561.1	19768.4	30577.4	11640.9	6265.94	7728.54	19438.6
1808	negative	NA	NA	Pyriminobac-methyl;Pyriminobac-methyl	-0.637171284305988;-0.677600204238451	MS1 mz matched	360.127	297.361	102312	113541	131187	146682	124453	136226	142017	151303	155827	141581	144555	174106	80811.9	121909	120576	96543.3	118238	165644	131828	133948	117615	122944	74536.6	289846	65292	116514	305148	151307	45252.1	110198	25091.9	210073	295502	55756.7	331229	150167	242568	544924	220670	100763	133599
4900	negative	NA	NA	CDP-DG(18:1(11Z)/20:4(5Z,8Z,11Z,14Z));CDP-DG(18:1(11Z)/20:4(8Z,11Z,14Z,17Z));CDP-DG(18:1(9Z)/20:4(5Z,8Z,11Z,14Z));CDP-DG(18:1(9Z)/20:4(8Z,11Z,14Z,17Z));	-19.4077069531283;-19.4077069531283;-19.4077069531283;-19.4077069531283;	MS1 mz matched	1026.5	349.072	19330.8	23813	27424.8	24444.8	29700.8	27574.2	27579.6	23918.4	22808	24190.7	22073	30662.4	27832.9	22428.8	27649.9	25072	29530.5	28877.8	25999.5	22198.3	29822.8	28657.5	29672.2	25453	31119.9	19932.3	28976.4	30711.3	28477	28807.8	30862.1	28719.6	25434.5	27827.1	27943.8	28843.7	31785.3	22462.4	28363.1	22514	26741.8
1477	negative	NA	NA	SC-57666	-23.0944	MS1 mz matched	315.079	388.968	1981.46	1989.05	2350.72	2334.44	2301.77	2180.07	2233.4	2355.21	2971.38	2040.03	2146.15	1183.47	15135.9	1777.12	598.78	944.824	2063.41	7707.42	1983.82	922.437	1753.62	4221.95	4763.08	2573.36	7737.97	1385.46	3524.54	3186.36	1674.64	1278.98	17832.3	993.987	6033.79	6906.27	1697.87	1152.59	1940.64	4854.17	1189.73	790.761	5433.33
3950	negative	NA	NA	DG(22:0/20:0/0:0);DG(18:0/24:0/0:0);DG(20:0/22:0/0:0);DG(18:0/0:0/24:0);DG(20:0/0:0/22:0);DG(24:0/18:0/0:0);	9.58857673371107;9.58857673371107;9.58857673371107;9.58857673371107;9.58857673371107;9.58857673371107;	MS1 mz matched	730.156	33.695	6747.11	7432.14	6811.4	5584.64	7939.43	7653.24	6441.88	7828.93	6052.09	5810.97	7447.09	9448.47	362.269	3077.29	5471.71	138.23	573.847	13305.7	1203.18	3325.79	9812.16	306.867	2433.17	0	8522.94	725.503	836.875	7862.92	8213.7	359.013	1005.2	328.671	0	361.046	5540.98	2560.92	219.654	0	4935.54	5316.48	1906.56
1162	negative	N4-Acetylcytidine	0.9309	NA	NA	MS2 forward	284.087	165.458	10496.8	9635.82	11238.4	10634.3	9486.45	9858.89	7382.16	9761.74	8285.79	8266.21	8967.31	7797.95	6894.07	6279.6	12333.6	15228.9	10488.4	8308.53	3484.57	9376	8811.8	7671.83	4634.65	8255.04	7799.47	11163.3	8015.34	8071.06	8009.29	5776.88	4101.48	5916.25	6896.16	8307.47	10911.3	6819.27	7958.98	5673.49	8494.86	6032.25	6482.77
1627	negative	Nicotinamide ribotide	0.7469	NA	NA	MS2 reverse	333.057	428.001	613.668	529.043	486.603	539.673	502.171	485.812	661.537	478.712	510.97	438.414	566.507	474.106	1304.96	605.839	1095.85	334.883	458.141	516.478	475.02	462.094	531.83	330.069	525.214	442.75	199.284	649.39	544.919	787.037	640.933	604.544	2452.61	571.124	915.033	681.315	564.086	550.995	315.009	465.909	396.675	378.082	734.937
4002	negative	NA	NA	PE(16:0/20:2(11Z,14Z));PE(18:0/18:2(9Z,12Z));PE(18:2(9Z,12Z)/18:0);PE(18:1(9Z)/18:1(9Z));PE(18:1(9Z)/18:1(11Z));PE(16:1(9Z)/20:1(11Z));PE(18:1(11Z)/18:1(11Z));PE(22:1(13Z)/14:1(9Z));PE(20:2(11Z,14Z)/16:0);PE(18:1(11Z)/18:1(9Z));PC(18:2(9Z,12Z)/15:0);PE(14:1(9Z)/22:1(13Z));PE(14:0/22:2(13Z,16Z));PE(22:2(13Z,16Z)/14:0);PC(15:0/18:2(9Z,12Z));PE(20:1(11Z)/16:1(9Z));	-8.74861216658001;-8.74861216658001;-8.74861216658001;-8.74861216658001;-8.74861216658001;-8.74861216658001;-8.74861216658001;-8.74861216658001;-8.74861216658001;-8.74861216658001;-8.74861216658001;-8.74861216658001;-8.74861216658001;-8.74861216658001;-8.	MS1 mz matched	742.534	143.641	336612	320214	309654	323380	367685	299760	269562	309612	269698	268185	238811	293334	319199	437256	289342	244514	355671	234849	277887	371892	210637	439229	378417	301256	365186	306062	383786	286404	278598	239392	251409	219754	303267	312974	357879	422010	252822	302519	269914	377690	235553
2064	negative	NA	NA	Sulfasalazine;Sulfasalazine;Salicylazosulfapyridine;Salazosulfapyridine	2.69225026880087;2.66788253792298	MS1 mz matched	397.07	234.726	32413.5	46293.4	38754.5	36237.2	34109.6	39371.7	45362.3	35984.7	34229.2	33916.7	40839	35370	43224.3	41761.9	37156.6	43302.3	50911.2	36765.8	49404.1	31276.8	31422.2	32001.3	46797.8	42968.6	43440.3	37603.6	41729.2	39709.5	41325.3	40237.1	36478.4	41313.7	34721.8	40636.8	46371	39243.3	43036.5	40497.6	50383.6	33988.3	42659.3
280	negative	NA	NA	Allopurinol;Hypoxanthine;Hypoxanthine;Purine-6-ol	3.59604054101167;3.59604054101167;3.67543011712255	MS1 mz matched	171.008	170.163	13238.5	15993.9	16682	12968.6	14851.3	14647.9	17082.5	13554.4	12196.4	13632	11893.9	5103.35	31923	12816.3	7589.49	7077.58	10298.6	38413.4	14687.2	6069.23	4167.35	15933.8	70885.9	2784.4	11096.4	13171.9	10724.1	10283.5	43066.5	9083.41	44640	6787.66	15932.7	11903.9	9330.97	7233.79	8803.57	13356.3	6014.66	5970.51	16797.9
3347	negative	NA	NA	iso-A2E(9,13-di-cis);iso-A2E(11-cis);iso-A2E(13-cis);N-Retinylidene-N-retinylethanolamine;iso-A2E(9-cis);	9.78763099988027;9.78763099988027;9.78763099988027;9.78763099988027;9.78763099988027;	MS1 mz matched	591.458	153.984	38402.2	40913.5	42590	42807.1	40693.4	39333.1	37816.3	29772	32859.5	31209.8	34104.3	51226.8	45320.5	48385.8	56470.8	28566.5	70241.6	24769	80796.2	32002	39634.5	52885.5	90055.2	29101.6	24275.4	31067.6	20907.8	12218.4	31508.5	40131	15625.2	11940.8	21651.8	106587	33529.8	29573.2	93412.4	43171.9	31622.9	31987.6	48264.3
1935	negative	NA	NA	Sunitinib;Desacetoxyvindoline;16-Methoxy-2,3-dihydro-3-hydroxy-N-methyltabersonine;Deacetoxyvindoline;Mitragynine	-2.01977940202971;-24.1072410618075;-24.1072410618075	MS1 mz matched	379.192	33.785	89622.6	120789	116942	100200	104428	119547	98163.1	92458.7	93058.3	97766	83840.2	128751	6227.28	26706.7	498446	132257	115611	218682	20780.7	59583.8	81311.2	22685.8	13638.7	137360	159156	59108.9	219201	147874	136968	22257.9	212961	32148.8	77042.4	35601.6	31318.4	12675.5	17527.2	14229.9	91282.5	33267.5	141248
4267	negative	NA	NA	Hebevinoside I;	-1.37415426183951;	MS1 mz matched	807.496	189.801	12034.3	18579.7	15725.7	13278.9	13185	13731.2	14150.2	13115.4	13639.1	15432.6	13983.8	7236.35	56271.3	10186.4	8969.09	9293.3	13900.1	11059.6	12151.9	10973.8	7379.77	27934.4	9528.76	11056.9	10488.9	13587.5	11777.4	11920.2	5098.68	9722.68	12628.3	27660.8	13779.1	21588.9	4552.38	9441.93	21526.2	9508.99	8307.57	3849.78	16107.9
3016	negative	NA	NA	Halofantrine;	-9.99152718493808;	MS1 mz matched	535.396	154.65	58091.3	70836	66038.9	73585.9	59286.8	56222.1	64046	79332.4	59279.3	58029.9	55449.6	66632.7	33032.1	47749.5	131415	43979.4	118317	73943.5	73276.5	51631.4	74577.9	63273.5	64895.8	44691.5	62412.7	47992	28832.3	50021.7	51727.1	36809.3	44030.8	31721.3	126326	90420.9	48885.7	51017.9	185987	93680.8	74372.8	58096	80730.1
3295	negative	NA	NA	LysoPC(20:4(8Z,11Z,14Z,17Z));LysoPC(20:4(5Z,8Z,11Z,14Z));	19.344508570952;19.344508570952;	MS1 mz matched	580.296	184.311	25041.9	30599.9	32624.8	40788.3	33430.2	38266.1	34924.6	35068.1	36485.2	30872.3	35958.5	27654.7	72973.6	26434.4	26800.7	39605.5	31364.7	38722.7	37439.6	23904.7	25604.3	34870.9	37830	9550.02	38547.9	33771.5	24229.1	22840	15513.8	51538.8	46747.4	28099	46761.7	31183.8	21442.7	37719.8	62448.2	37806.1	16468.1	22572.7	52385.6
4376	negative	NA	NA	Lankamycin	15.1578	MS1 mz matched	831.495	189.06	5188.99	6568.25	7601.87	6805.52	5333.17	6170.63	6693.75	5543.97	5362.52	5834.09	5751.71	3128.87	23478.5	5033.18	4902.99	4871.5	4129.43	3320.05	5004.41	5219.53	3879.95	10125.3	6943.91	4266.44	4671.36	3245.79	4989.5	5706.59	3424.05	2236.28	6063.28	8673.41	6623.02	8265.56	2762.86	4991.34	6829.51	4901.85	2126.62	1186.9	6657.99
1050	negative	NA	NA	Ethenodeoxyadenosine;Cardiospermin;Sarmentosin;2-Butenenitrile,4-(beta-D-glucopyranosyloxy)-2-(hydroxymethyl)-, (E)-;1,6-Anhydro-N-acetyl-beta-muramate	4.06722108016994;8.93564351928915;8.93564351928915;8.93564351928915	MS1 mz matched	274.103	421.494	4271.21	3089.13	3029.75	3214.54	3558.28	3763.78	3830.99	3535.47	3447.94	3101.39	2798.12	2411.34	5105.74	3311.89	4398.28	2253.84	2243.95	1746.92	8064.41	3281.06	2904.85	4826.88	3472.98	6746.97	934.319	2549.12	6030.26	2972.98	3175.66	5650.21	2895.64	3785.97	4565.71	2607.63	5957.45	3332.48	6908.29	3306.66	1518.45	1327.26	1727.7
4574	negative	NA	NA	PC(22:5(4Z,7Z,10Z,13Z,16Z)/22:5(4Z,7Z,10Z,13Z,16Z));PC(22:5(4Z,7Z,10Z,13Z,16Z)/22:5(7Z,10Z,13Z,16Z,19Z));PC(22:4(7Z,10Z,13Z,16Z)/22:6(4Z,7Z,10Z,13Z,16Z,19Z));PC(22:5(7Z,10Z,13Z,16Z,19Z)/22:5(4Z,7Z,10Z,13Z,16Z));PC(22:6(4Z,7Z,10Z,13Z,16Z,19Z)/22:4(7Z,10Z,13Z,16Z));PC(22:5(7Z,10Z,13Z,16Z,19Z)/22:5(7Z,10Z,13Z,16Z,19Z));	4.30379783066218;4.30379783066218;4.30379783066218;4.30379783066218;4.30379783066218;4.30379783066218;	MS1 mz matched	880.597	136.311	16224.2	14528.5	14901.6	11386.2	13294.9	12011.5	12550.7	11823.4	12642.8	10863.8	12354.2	9467.05	32623.9	14536.4	11643.1	8472.92	11706.2	7573.81	8227.55	10049.6	8907.16	9262.84	13109.5	9627.2	9291.33	9015.41	8095.11	10534.2	6345.45	15024.7	26552.7	17686.8	12524.4	11131.7	9735.18	9976	13300.3	15374.8	11353.9	10470.4	10741.1
135	negative	L-Threonate	0.9775	NA	NA	MS2 forward	135.031	339.26	16393.7	16210	18668.6	22003.8	18915.2	23539.5	19821.2	16364.3	18477.2	17308.6	17773.6	14109.2	42997.2	18002	22043.9	14658.8	13330.3	25521.9	19433.9	13670.4	17815.6	23791.6	15237.7	15877.7	24717.8	17291.1	23389.8	25225.2	24194.2	15693.4	34153.2	27442.4	20561	32977.1	17402.4	18318.5	13346.8	13833.7	18737.3	23797.3	33272.4
3413	negative	NA	NA	Neocasomorphin (1-5);Irinotecan carboxylate;CPT-11 carboxylate form	10.2013884445726;24.3373785953201	MS1 mz matched	602.297	168.195	53253	53253.7	54482.3	48672.8	46092.1	54309.8	46626.1	44544.3	39767.7	43787.6	36975.2	38606.7	65535.9	91723.4	34239.3	26810.1	21846.1	62136.1	37960.8	38399.9	46719.7	46555.1	35039	24537.2	47380.9	54786.7	45169	33270.8	19118.6	71566.6	31473.6	63483.1	55726.2	46335.6	42260.2	39438.8	66225.8	43307	30551.5	31855.1	79454.6
4899	negative	NA	NA	NA	NA	Unmapped	1026	349.048	33561.1	38426.7	46435.2	47977.4	48738.1	50499.3	51987.3	43840.6	44482.3	49956.2	40404.9	53060.3	45339.4	42506.5	48782.1	46807.9	44246.5	53535.4	41524.7	40795.1	48932.7	46790.1	47514.6	47014.7	47445.1	36441	50835.1	53751.4	52371.5	52547.6	51094.6	48811.3	39450.4	46747.8	50415.9	44866.4	48346.7	43116	52276.1	44019.3	52972.8
269	negative	Vanillic acid	0.8756	NA	NA	MS2 forward	167.035	48.2975	16546.2	14890.2	16183.1	15757.3	13974.7	17497	14591.8	18223.2	17048	13880.2	11364.3	10604.3	32591.6	16546.8	20568.3	6764.36	12259	5483.44	7676.21	11877.5	4951.27	13609.8	8567.39	5152.36	9130.07	4511.49	6735.94	2483.32	5353.01	8775.43	13159.7	30326.7	7629.14	9805.38	4722.85	35500.9	43696.8	13773.9	7622.66	8554.03	6546
1767	negative	NA	NA	Phytuberin;Nordihydrocapsiate;Gingerol;Myrsinone;Tanacetol A;Phytuberin;Embelin;[6]-Gingerol;(S)-(+)-[6]Gingerol;6-Gingerol	3.02770611859043;3.02770611859043;3.02770611859043;3.02770611859043;3.02770611859043;3.05931917911483;3.05931917911483;3.05931917911483	MS1 mz matched	353.198	27.447	24927.9	29849.6	22934.2	29874.9	21156.6	23117.2	23058.1	26564.8	25734.6	24756.4	20126.8	22483.1	92391.8	46282.7	32259.3	122522	22386.5	140638	72920.8	36962	103430	140167	38230.1	77395.8	42817.3	42662.2	56849.1	24453.2	28932.9	118387	54305.3	59456.2	24345.5	26282.3	13567.6	16212.7	22947.6	21013.9	10259	25774.4	39884.2
1495	negative	NA	NA	Melanin;Prekimycin	-0.983764098122621;-1.11958564319684	MS1 mz matched	317.064	152.036	11077.6	15117.9	17750.6	18349.2	18457.5	17611.2	16525.6	17032.4	16655.4	16461.6	15009.9	15473.3	23204.2	10562	16343.2	13057	15857.2	15329	10329.4	10545	16178.1	11736.9	14898.7	15799.6	16393.2	16828	17557.9	26184.2	33197.4	13749.3	24734.8	10009.7	10343.1	12091.3	15357.1	12255.5	9385.78	9906.7	24748	14091.8	17299.1
3432	negative	NA	NA	NA	NA	Unmapped	606.322	301.016	3238.74	3190.51	3747.56	3409.33	3603.02	3219.66	3407.07	3722.7	4175.84	4116.76	4664.85	10654.7	919.599	2092.51	2628.26	7772.39	13951.4	620.489	3309.09	2480.33	461.878	7746.79	1512.5	1551.12	15476.7	4375.31	1327.37	1344.82	4469.36	682.213	1236.76	1713.45	620.154	2592.68	990.72	2098.17	2403.84	1895.73	2095.88	16205.2	2347.96
4079	negative	NA	NA	2,2',3,4,4',5',6-Heptabromodiphenyl ether;	4.15236407918428;	MS1 mz matched	762.502	39.059	47131.7	51476	44529.2	39486.1	37846	41031	40565.7	36058.8	44906	33402.5	37816.2	22313.7	13144.7	59881	48465	44155.4	32038.2	30211.4	16097.5	35129.5	22878.4	48553.4	48762.2	39665.6	44446	47996.5	46085.2	39788.9	28713.5	51543.8	21513	54027.8	34078.9	53259.2	30054.5	73157.6	33071.8	20202.7	33585.9	49035.6	41653.4
5184	negative	NA	NA	NA	NA	Unmapped	1190	349.241	23641.2	27165.8	31211.4	28584	28747.5	29728.5	30814.6	23197.7	25545.5	23596.3	21248.3	32856.5	30163.5	26841.1	26139.5	24409.3	25034.9	27257.9	23118.2	24782.3	24387.7	30194.8	26090.4	27018.4	24829.7	26330.6	33531.4	31741.5	32098.7	30976.7	30560	26077.3	28579.5	29858.3	34393.5	25641.2	29691.2	19420.5	30422.3	18947.4	26905.4
979	negative	NA	NA	7-Hydroxytrichodermol;Blennin D;Ipomeamaronol;Alkhanol;(1alpha,4alpha,5beta,6alpha,11betaH)-1,4-Epoxy-5-hydroxy-10(14)-germacren-12,6-olide;Ipomeamaronolide;Isoleptospermone;1alpha,15-Dihydroxymarasmene;Absindiol;Adhumulinic acid;4'-Dihydroabscisic acid;3,14-Dihydroxy-11,13-dihydrocostunolide;Arabsin;Artemin;(R)-Athanagrandione;Arlatin;3alpha,15-Dihydroxymarasmene;10-Hydroxymyoporone;Humulinic ac…	-10.5548784674634;-10.5548784674634;-10.5548784674634;-10.5548784674634;-10.5548784674634;-10.5548784674634;-10.5548784674634;-10.5548784674634;-10.5548784674634;-10.5548784674634;-10.5548784674634;-10.5548784674634;-10.5548784674634;-10.5548784674634;-10	MS1 mz matched	265.147	27.3245	96132.8	110800	92170.7	81911	87588.7	78398.1	98226.9	113520	88491.3	85533	79460.4	82872.2	244205	135941	99190	329981	76328.5	696082	247045	165148	362348	378166	181210	278532	182424	142476	261416	78477.5	91913.1	322311	146737	191135	99347.5	112847	42790.9	74810.5	62860.1	77939.5	47220.5	110518	142228
4729	negative	NA	NA	Lyciumoside VI;Capsianoside VI;	-10.1836700732641;-10.1836700732641;	MS1 mz matched	944	349.062	38581.1	45225.7	50764.4	58297.4	61056.8	58215.7	59937.5	58991.4	57904.5	53614.3	56351.1	64993.2	52400.4	42030.5	59111.9	59167.7	41708.4	65984.3	58628.3	46068.3	58430.7	54509	50426.8	61514.2	64470.4	43815.9	61787.4	68080.6	63470	68406.9	67667.2	64709.9	52154.7	49636.2	56810.2	58003.1	61393.9	51362.5	62703.9	50212	66475.4
4189	negative	NA	NA	PE(20:2(11Z,14Z)/20:4(5Z,8Z,11Z,14Z));PE(20:5(5Z,8Z,11Z,14Z,17Z)/20:1(11Z));PE(20:1(11Z)/20:5(5Z,8Z,11Z,14Z,17Z));PE(18:4(6Z,9Z,12Z,15Z)/22:2(13Z,16Z));PE(20:3(5Z,8Z,11Z)/20:3(8Z,11Z,14Z));PC(15:0/22:6(4Z,7Z,10Z,13Z,16Z,19Z));PE(18:1(11Z)/22:5(4Z,7Z,10Z,13Z,16Z));PE(22:5(7Z,10Z,13Z,16Z,19Z)/18:1(11Z));PE(18:0/22:6(4Z,7Z,10Z,13Z,16Z,19Z));PE(22:5(4Z,7Z,10Z,13Z,16Z)/18:1(9Z));PE(18:1(11Z)/22:5(7Z,1…	-14.2725663351763;-14.2725663351763;-14.2725663351763;-14.2725663351763;-14.2725663351763;-14.2725663351763;-14.2725663351763;-14.2725663351763;-14.2725663351763;-14.2725663351763;-14.2725663351763;-14.2725663351763;-14.2725663351763;-14.2725663351763;-14	MS1 mz matched	790.535	138.724	65720.5	71186.9	75357.9	74560.6	71142.4	64017.6	68652.9	80983.5	65076.4	47229.5	63859.2	75972	29164.1	96157.9	75273.5	103918	56970.5	60544.5	66305.2	52937.4	69627.2	192852	58511.2	88159.7	117520	74122.7	85817.9	102167	54960.6	119443	29407.5	139367	73668.4	114744	36921.4	80771.1	88164.7	64135.1	72199.6	122134	83884.6
3655	negative	NA	NA	NA	NA	Unmapped	655.214	514.597	4454.87	4580.74	3912.3	3916.14	4191.81	2985.34	3560.43	4233.26	4268.71	3576.66	3287.38	5165.88	6056.87	10383.9	5102.17	4199.49	6303.8	5214.62	6228.14	5467.68	5168.89	3598.45	5536.13	682.922	1835.9	7628.67	3280.61	2637.12	4164.02	5221.83	5647.87	4093.72	3510.38	6102.17	4098.46	5252.23	3222.11	4157.16	2309.72	3674.2	3779.48
5114	negative	NA	NA	NA	NA	Unmapped	1149.01	349.045	133454	145032	135422	153343	143006	135635	123310	117917	116541	113211	96757.6	148265	155022	137249	143995	129055	146333	123969	114668	148547	122006	145224	160560	126827	120419	135633	153988	155885	143588	145341	155489	136864	142571	144815	157180	131193	134378	95899	143302	108002	133924
3849	negative	NA	NA	DG(22:0/20:0/0:0);DG(18:0/24:0/0:0);DG(20:0/22:0/0:0);DG(18:0/0:0/24:0);DG(20:0/0:0/22:0);DG(24:0/18:0/0:0);	9.58857673371107;9.58857673371107;9.58857673371107;9.58857673371107;9.58857673371107;9.58857673371107;	MS1 mz matched	708.177	33.728	20054.9	28841.6	30908.5	29136.6	30465.4	29222.8	25870.3	30066.5	23711.4	27811.4	23296.4	59705.8	799.42	9276.1	23950.3	729.083	846.46	63357.3	1779.78	7789.81	49546.4	678.11	8556.91	164.729	44070.5	707.478	407.25	27862.8	93864.2	693.373	1697.93	337.697	203.933	745.427	19402.4	7883.48	561.051	152.841	25151.5	18577.2	5984.79
2006	negative	NA	NA	NA	NA	Unmapped	389.288	35.808	206081	149323	146326	140615	143781	141589	147031	136932	172560	165619	155751	9144.6	4679.53	12654.1	9450.11	19263.7	17475.2	11493.6	10404.4	27460.4	3552.47	13424.1	12012.9	12367.8	8453.86	6854.39	10440.1	7445.6	4782.95	18591.5	16065.2	31236.4	6464.62	25226.9	7069.87	21110.2	8912.69	22657.2	1655.14	11866.6	11623.8
1619	negative	NA	NA	(1S,2S,4S,5S)-2,4-Thujanediol 4-O-beta-D-Glucopyranoside;(1S,2S,4R)-1,8-Epoxy-p-menthan-2-ol glucoside;(2E,4E,7R)-2,7-Dimethyl-2,4-octadiene-1,8-diol 8-O-b-D-glucopyranoside;(1R,2S,4R,5S)-2,5-Fenchanediol 2-O-b-D-glucoside;(1R,3S,4S)-1,8-Epoxy-p-menthan-3-ol glucoside;(4R,6S)-p-Menth-1-ene-4,6-diol 4-glucoside;(1R,2R,4S,6R)-2,6-Fenchanediol 2-O-b-D-glucoside;Neomenthol-glucuronide;(S)-p-Menth-1-e…	-7.53589499518281;-7.53589499518281;-7.53589499518281;-7.53589499518281;-7.53589499518281;-7.53589499518281;-7.53589499518281;-7.53589499518281;-7.53589499518281;-7.53589499518281;-7.53589499518281;-7.53589499518281;-7.53589499518281;-7.53589499518281;-7.	MS1 mz matched	331.174	190.681	22390.5	24693	17243	18927	17590.6	18390.8	19010.9	18782	23408.6	23357.7	19376.8	14404	1184.62	37589.2	73533.1	3995.94	20442.5	11444.2	2701.97	1395.66	3226.85	1868.05	2545.11	1637.31	6096.94	3311.31	42586.2	102327	81538.5	3201.57	65853.9	9680.65	754.6	1782.66	27164.3	2371.44	2086.22	1211.05	138140	58756.6	5401.07
4314	negative	NA	NA	PG(18:3(6Z,9Z,12Z)/22:4(7Z,10Z,13Z,16Z));PG(18:3(9Z,12Z,15Z)/22:4(7Z,10Z,13Z,16Z));PG(18:1(11Z)/22:6(4Z,7Z,10Z,13Z,16Z,19Z));PG(18:2(9Z,12Z)/22:5(4Z,7Z,10Z,13Z,16Z));PG(18:2(9Z,12Z)/22:5(7Z,10Z,13Z,16Z,19Z));PG(18:1(9Z)/22:6(4Z,7Z,10Z,13Z,16Z,19Z));	24.8169028362244;24.8169028362244;24.8169028362244;24.8169028362244;24.8169028362244;24.8169028362244;	MS1 mz matched	819.546	40.3475	165086	176243	135864	156591	148658	147025	144780	120654	137953	127152	114192	119555	135928	179486	141546	111434	157663	126082	94313.6	160536	179802	158136	141874	121157	139478	178704	150562	126746	257271	102728	134314	88280	140188	133930	134247	142501	136961	106302	317925	115838	109602
32	negative	(S)-2-aminobutyric acid	0.9943	NA	NA	MS2 reverse	102.058	389.236	2426.54	2447.24	2148.04	2423.52	3007.92	2637	2545.11	2718.17	3295.18	2556.72	2165.39	1682.74	9381.98	2019.14	1096.23	1597.78	2737.62	4868.69	1678.69	1465.21	2366.94	3371.18	3673.91	2993.43	5124.99	2288.1	3532.3	3178.71	2042.91	1901.37	8834.23	1733.82	3156.29	4593.43	2635.93	1766.53	2639.58	3501.53	2240.55	1400.15	4002.39
4982	negative	NA	NA	NA	NA	Unmapped	1067.5	349.055	20193	18632	26855.1	26469.3	25776.1	26894.7	25930.6	22167.8	22689.8	22102.9	19795.1	30029.4	26727.7	23111	26211.2	25925.6	25178.3	28735.8	22935.7	19577.2	25152.6	28368.8	25673.9	23239.4	24435.5	20229.5	29879.7	29896.5	28079.3	26648.2	27057.1	27322.6	21502.4	26806.7	29578.2	26908.8	24010.5	17201.7	28652.9	20496.5	28730.6
2347	negative	NA	NA	Artonin K;Mollicellin A;Mollicellin B;Austrobailign 1;12-Deoxyaklanonic acid	12.4235402785048;12.4235402785048;12.4235402785048;12.3002742961532;12.3002742961532	MS1 mz matched	441.125	50.6885	27976	34388	44598.1	42919	40903.5	37941.8	36548.6	42368.3	31810.4	37703.6	39971.1	41798.5	20177.8	28871.5	47766.6	59610.5	42704.2	17141.9	9038.96	13372.5	15281.5	22580.7	50865.3	28513.8	83462.8	9630.66	65759.6	47779.2	74931.3	4613.55	67420	41777.8	46956.7	25968.6	66901.3	33245.8	12757.1	39703.1	40233.3	32256.7	84270.1
2785	negative	NA	NA	NA	NA	Unmapped	501.39	104.984	66644.1	65694.6	76549.4	69561.5	63875.1	68311.2	63354.8	62592.8	45414	59589.8	52423.5	68929.5	33902.5	43067.2	82374.4	52735.5	59762.2	65172.1	92998.9	43413.2	89216.7	81499.6	118815	60103.5	35596.8	39109.1	74273.9	42414.9	72910.5	24783.8	56536	25582.5	62047.2	98256.5	50551.7	77062	146637	46315	30726	38308.8	54356.9
4030	negative	NA	NA	PE(P-18:1(11Z)/20:5(5Z,8Z,11Z,14Z,17Z));PE(20:5(5Z,8Z,11Z,14Z,17Z)/P-18:1(11Z));PE(20:5(5Z,8Z,11Z,14Z,17Z)/P-18:1(9Z));PE(22:6(4Z,7Z,10Z,13Z,16Z,19Z)/P-16:0);PE(O-16:1(1Z)/22:6(4Z,7Z,10Z,13Z,16Z,19Z));PE(P-18:1(9Z)/20:5(5Z,8Z,11Z,14Z,17Z));Spinetoram	-18.5903983908102;-18.5903983908102;-18.5903983908102;-18.5903983908102;-18.5903983908102;-18.5903983908102;19.1219412217123	MS1 mz matched	746.506	138.026	56502.6	60570.5	67442.9	49620.6	49077	48150.2	44403.8	54837.9	49949.9	48180	45580.3	33114.3	27371.2	51504.2	46196.6	33498.9	29959.2	56482.1	34682.4	36066.1	28390.4	65702.1	27671.4	48469.3	35042.8	50070.6	59527	80608.4	15819	35314.5	26369	40504.3	123223	27116.4	31249.3	47769.7	70288.5	40769.6	74028.1	53216.9	115919
1487	negative	NA	NA	Floribundine;(E)-2-Hydroxy-N-desmethyldoxepin;Dimizene	12.1686020735677;12.1686020735677;21.697459867715	MS1 mz matched	316.114	379.159	6315.83	5114.08	5329.7	4869.64	4902.61	4278.62	4184.19	4591.75	4616.38	4126.99	4305.6	3709.66	27769.4	7426.75	3093.45	2251.64	4878.23	4655.64	3556.49	5908.98	2792.95	4573.6	6769.42	4581.42	6818.77	4264.96	4279.42	2832.6	3558.22	3772.59	12359.1	3441.08	6890.1	6107.58	4685.57	3358.77	7315.31	6134.72	2097.5	2183.06	4768.47
3600	negative	NA	NA	Phosphatidylinositol-3,4,5-trisphosphate;	4.77987386154217;	MS1 mz matched	642.974	348.968	12013.9	16615.3	15626.6	15817.5	15674.4	18280.6	17949.2	19228	20013.8	19536	17489	17539.5	16141.9	14788.6	15651.1	17974.4	15178.3	17817.7	20465.9	16688.1	14742.5	20004.8	17107.3	19070.1	19155.4	13644.1	16161.2	18252.8	17311.9	17604.4	19957.3	17410	15037.9	15689.8	14528.4	15668.4	18146.6	20897.4	17173.9	19850	16709.4
4293	negative	NA	NA	PC(20:3(5Z,8Z,11Z)/20:3(5Z,8Z,11Z));PC(18:1(9Z)/22:5(4Z,7Z,10Z,13Z,16Z));PC(20:3(8Z,11Z,14Z)/20:3(5Z,8Z,11Z));PC(18:2(9Z,12Z)/22:4(7Z,10Z,13Z,16Z));PC(20:4(5Z,8Z,11Z,14Z)/20:2(11Z,14Z));PC(22:5(7Z,10Z,13Z,16Z,19Z)/18:1(9Z));PC(18:4(6Z,9Z,12Z,15Z)/22:2(13Z,16Z));PC(18:1(11Z)/22:5(4Z,7Z,10Z,13Z,16Z));PC(20:3(8Z,11Z,14Z)/20:3(8Z,11Z,14Z));PC(22:4(7Z,10Z,13Z,16Z)/18:2(9Z,12Z));PC(22:5(7Z,10Z,13Z,16Z,…	-20.9397037501742;-20.9397037501742;-20.9397037501742;-20.9397037501742;-20.9397037501742;-20.9397037501742;-20.9397037501742;-20.9397037501742;-20.9397037501742;-20.9397037501742;-20.9397037501742;-20.9397037501742;-20.9397037501742;-20.9397037501742;-20	MS1 mz matched	814.552	40.3185	10478.9	12119.9	8532.42	10606.4	13904.1	11274.8	11129.4	11295.1	11650.6	9129.94	9800.78	8774.96	15188.5	14962.7	6502.13	13483	12603	10046.8	11142	9486.57	8570.06	10387.8	14693.6	12801.8	12411.6	11381.2	8948.52	11606.7	7046.67	9892.78	7834.92	15179.2	10337.7	11730.3	11091.5	13339.9	15991.2	11840.5	10500	14254.4	8940.88
3249	negative	NA	NA	Mangiferin 6'-gallate;	21.0638497510935;	MS1 mz matched	573.447	105.601	116443	109149	159757	145018	145971	104172	113673	129907	136644	120745	128784	174179	72262.8	102220	194209	100775	143578	105974	220620	88609.9	159690	149738	284990	81537	107045	128861	95100.7	24371.4	197276	87582.3	50523.4	44744.4	43425.3	210457	154064	90213.5	382647	143333	47084.3	105093	143476
4224	negative	NA	NA	PG(18:1(9Z)/20:3(5Z,8Z,11Z));PG(18:0/20:4(5Z,8Z,11Z,14Z));PG(18:1(11Z)/20:3(8Z,11Z,14Z));PG(18:1(9Z)/20:3(8Z,11Z,14Z));PG(18:1(11Z)/20:3(5Z,8Z,11Z));PG(16:0/22:4(7Z,10Z,13Z,16Z));	-0.593582482687235;-0.593582482687235;-0.593582482687235;-0.593582482687235;-0.593582482687235;-0.593582482687235;	MS1 mz matched	797.541	144.606	55462.4	71758.5	75726.4	73092.6	54461.9	52974.4	76620.2	71180.9	71040.2	75553	74646.9	62969.2	55312.1	78097.1	67644.6	77337.8	67091.6	34820.6	38396.2	73481.4	45282.4	84460.9	71917.1	74728.6	68876.6	61115.8	66232	50227.1	80562.1	77170.5	56365.4	51851.7	53939.2	51743.8	76173	79562.9	78662.7	58789.7	85969.9	93929.4	66983.8
4069	negative	NA	NA	PE(16:0/20:2(11Z,14Z));PE(18:0/18:2(9Z,12Z));PE(18:2(9Z,12Z)/18:0);PE(18:1(9Z)/18:1(9Z));PE(18:1(9Z)/18:1(11Z));PE(16:1(9Z)/20:1(11Z));PE(18:1(11Z)/18:1(11Z));PE(22:1(13Z)/14:1(9Z));PE(20:2(11Z,14Z)/16:0);PE(18:1(11Z)/18:1(9Z));PC(18:2(9Z,12Z)/15:0);PE(14:1(9Z)/22:1(13Z));PE(14:0/22:2(13Z,16Z));PE(22:2(13Z,16Z)/14:0);PC(15:0/18:2(9Z,12Z));PE(20:1(11Z)/16:1(9Z));	-0.679177424114922;-0.679177424114922;-0.679177424114922;-0.679177424114922;-0.679177424114922;-0.679177424114922;-0.679177424114922;-0.679177424114922;-0.679177424114922;-0.679177424114922;-0.679177424114922;-0.679177424114922;-0.679177424114922;-0.67917	MS1 mz matched	759.559	175.104	10179	11967.4	10065.2	12262.4	9142.32	9039.58	9351.33	9839.91	9652.78	7476.56	9227.51	14491.3	12274	11902.4	15975.9	12129.6	12970.9	7559.11	13013.8	12692.4	10241.4	13421	11182	13797.3	10542	9772.33	11659.6	14458.4	10709.6	12348.9	14659.9	9817.36	17117.3	15715.2	10916.9	10484.8	12568.8	7778.77	13371.3	11532.3	10798.2
4872	negative	NA	NA	NA	NA	Unmapped	1012.78	39.697	21650.2	24791.2	18966.9	28555.2	22985.3	27256.9	22086	21264.8	23997.9	20464.3	18934.1	26590.6	29318.7	18215.8	24861.3	32840.3	33124.5	17416.8	21246	21401.8	26881.3	33541.5	18053.2	22255.1	27066.1	20611.7	16116	17282.3	16802.7	25401.1	21816.1	14548.9	23166.4	24980.9	26181.2	19386.8	22103.9	17764.6	5203.58	22596.3	20753.8
1098	negative	Linoleic acid	0.9993	NA	NA	MS2 forward	279.232	39.059	3042381	2756197	2523633	3196822	3077888	3008126	1825337	3132856	3005309	2764131	2829541	3446643	1130649	1768926	2577261	2828155	2168569	2279000	3123730	3364075	1966713	4238781	2403771	1174165	2358049	1562911	2170020	2015706	2028037	1330279	3689358	1024667	2979573	2835080	2872415	1366188	3184035	3219372	761994	3305161	2852026
2505	negative	Lanosterol	0.8526	NA	NA	MS2 reverse	463.339	152.716	75656.4	77371.4	96032.6	80181.6	78080	70403.7	73387.3	69474.8	64148.4	61535.2	60745.8	75975.5	42502.5	35201.8	147830	41435.6	78284.5	63588.3	100983	55170.9	61965.8	64528.4	60687.9	63958.6	52345.6	48477.5	34078.8	57266.5	74539.1	44699.2	65372.3	35815	98304.3	70624.2	78912.6	59605.7	109226	47330.4	77454	58417.1	71095.5
3551	negative	NA	NA	3'-Sialyllactose;6'-Sialyllactose;	-21.2832478147521;-21.2832478147521;	MS1 mz matched	632.198	423.507	3037.19	3139.82	3342.06	2029.69	3189.05	3272.82	2881.22	2790.08	3186.98	2965.59	2377.01	2142.69	2948.73	2646.53	3735.22	2131.42	3128.23	2944.41	1936.4	2027.26	4490.74	2136.32	2110.4	4442.8	3812.09	2968.68	2540.66	5584.33	4872.91	1730.36	1718.42	2096.13	1766.35	2123	2654.12	1899.61	1304.4	1716.74	4537.07	2464.35	3106.13
914	negative	2'-O-Methyluridine	0.9182	NA	NA	MS2 forward	257.076	94.201	8054.45	9081.94	9796.04	9319.45	9404.42	9266.75	11862.2	11367.6	12686.5	9228	9764.3	8373.21	11115.4	4355.33	8069.37	8857.5	10272.6	9271.08	6461.06	7221.87	7659.34	5903.92	10247.6	7154.62	13096.9	7956.87	6389.32	9602.81	15447.5	6567.4	14804.4	6078.33	7433.9	8956.31	8890.46	9983.8	5905.8	18210.1	10761.4	7303.37	17140.7
3846	negative	NA	NA	NA	NA	Unmapped	707.483	176.754	6884.3	6403.4	7488.46	7691.81	7597.69	6917.43	8260.6	8336.97	5326.21	6632.38	5666.33	8978.9	10451.6	4631.54	6945.19	6108.43	5822.95	7872.04	7362.94	7751.88	10049.3	7149.54	7686.68	17754.4	7325.26	10365.1	11287	10405	7065.25	9008.66	11515.5	10757.5	19907.5	7772.87	7769.36	9154.86	15485.2	5194.54	7991.01	5274.57	10552.4
2192	negative	NA	NA	Borax;Cibarian;beta-D-Glucopyranose, 1,6-bis(3-nitropropanoate);Cororian;alpha-D-Glucopyranose, 2,6-bis(3-nitropropanoate)	0.496222310841617;2.61721183182936;2.61721183182936	MS1 mz matched	417.049	154.017	18066	19825.2	16242.6	15835.7	12468	14921.9	13539.3	14305.5	13969	13961.5	14925.6	16026.8	18698.2	17825.6	27267	19250.8	13577.8	14010	12625.1	4626.41	20516.1	17699.8	11083.4	8548.1	14545.9	14769.9	15948.5	18604.8	45460.8	9697.38	13701	24869.3	5702.08	9932.78	10653.8	8052.42	27699.2	25581.9	14809.2	9661.47	19618.7
4690	negative	NA	NA	NA	NA	Unmapped	920.594	135.664	16715	19797.3	19134.9	15936	18389.8	13851.2	15272.4	16939.3	16765.4	12990.6	13482.6	16116.4	36598.2	14932.1	10626	7789.86	9424.31	15909	6439.6	11706.3	7133.1	7638.04	10277.1	10598.6	9196.93	16842.1	7777.01	13585.3	6211.69	13797	34785.5	13584.8	16111.9	11726	13671.3	8465.78	9085.89	9704.9	21878.4	11601.2	24668.2
3934	negative	NA	NA	Spirolide F;	-0.329071116273001;	MS1 mz matched	726.502	40.985	6642.29	9364.12	8818.74	8617.61	6045.34	8418.19	7800.49	6715.5	6705.32	7270.17	7772.05	7487.33	5313.51	19755.8	5141.29	6131.78	11358.8	11723.8	7665.7	25115.8	4537.19	16599.2	17496.3	8085.31	9283.88	16770.7	21056	13869.4	3423.75	6350.07	13344	8155.19	22105	11158.3	11713	11165.4	10787.7	9536.24	8824.77	6785.62	14775
3185	negative	NA	NA	NA	NA	Unmapped	560.972	349.056	9757.99	12223.9	13900.3	14162.9	11435	13948.4	15433.9	14099.5	13007.2	16583.4	14635.8	13144.1	12487.8	10127.6	13319.1	15781.5	15414.5	16804.6	18480.2	10787.4	16897.5	15093.2	15987.8	14489.5	16362.2	12516.7	15833.2	14560.2	13110.3	17489	12199.8	13253.5	11645.2	13591	12994.4	16063.8	13947.9	16120.6	17045.3	14978.7	14437.8
1480	negative	NA	NA	6b-Hydroxy-8a-methoxy-7(11)-eremophilen-12,8-olide;Methyl (3b,11x)-3-Hydroxy-8-oxo-6-eremophilen-12-oate;Prehumulinic acid;3b-Hydroxy-6b-methoxy-7(11)-eremophilen-12,8a-olide;1-(3,4-Dihydroxyphenyl)-5-hydroxy-3-decanone;3,4-Epoxy-6-methylcyclohexylmethyl-3,4-epoxy-6-methylcyclo-hexanecarboxylate	1.9299172050126;1.9299172050126;1.9299172050126;1.9299172050126;1.78464668453042;1.78464668453042	MS1 mz matched	315.134	28.776	20351.5	22732.8	25464.5	27000.8	18707.5	23812.7	26180.2	23495.8	22950	18723.5	18041.8	18703.4	7080.48	7691.42	9682.33	8579.4	9439.39	13572.4	6692.92	11136.5	8040.25	21929.5	8719.77	14505	16628.5	14074.2	9975.22	7305.05	8347.58	13900.1	10383.3	12226.1	16588.2	19670.1	10060.6	17399.4	13768.3	12515.1	11704.7	15435.1	19633.4
3238	negative	NA	NA	Carindone;Glyuranolide;	-3.49219567784677;-3.49219567784677;	MS1 mz matched	571.326	33.81	17726.2	18651.1	17899	14989.1	17999.2	13614.1	18718.2	21039.6	19096.9	13835.2	15115.6	14898.5	5870.88	6900.6	10859.1	12515.4	44767.1	17137	11149.8	18372.5	18628.5	14631.7	7006.98	34324.8	23312.9	81375.3	29814.3	17474.7	14918.2	5271.83	9937.51	7519.52	17125.2	4479.38	6168.21	7178.41	4724.84	6464.92	12955.5	22035.1	19087.3
4557	negative	NA	NA	NA	NA	Unmapped	875.369	33.189	3789.9	4724.05	4624.2	4732.33	5630.59	5270.77	5897.87	4551	4677.11	3698.62	4806.59	3106.64	321.978	416	30526.1	4897.28	3880.22	5604.36	137.963	978.692	3358.69	152.752	207.227	3732	7416.01	716.469	6556.2	6951.06	4014.62	729.118	5039.85	172.081	2805.41	794.091	1866.97	397.789	635.128	152.38	6200.7	1043.45	4699.97
4337	negative	NA	NA	NA	NA	Unmapped	823.553	138.552	193134	207365	251401	238804	245692	224983	205405	204273	206848	306189	226504	443010	131219	181235	236994	287570	230366	206447	217070	190605	197907	296144	225794	149349	269107	159462	217894	231432	206515	335168	170460	206106	207664	251453	193858	313591	278124	236444	227490	202933	320400
5054	negative	NA	NA	(S)-Hydroxyoctadecanoyl-CoA;	-16.205802249225;	MS1 mz matched	1108	349.055	28515.6	30156.3	38118.4	41443.1	37127	41093.2	34977.8	33211.6	34165.3	29196.6	28540.9	40208	40270.1	28329.9	40081	34455.3	40824.2	41147.7	31808.4	33470.4	36426.9	38297.7	41883.6	33620.4	36185.9	33759	41412.9	44770.7	38070	37281.4	48859.8	39164.4	33864.8	38379.5	40081.7	38043.4	38099.1	35417.6	42531.1	27517.7	35023.4
2539	negative	NA	NA	NA	NA	Unmapped	469.025	349.05	3763214	3632904	3329091	3401129	3174455	3049516	3054859	2746033	2670731	2522712	2500322	2933060	3673359	3633450	3076135	2879527	3866460	2824197	2667714	4195510	2786976	3474093	3457153	2943516	2689007	4015155	3030075	3348186	3041210	3060095	3479343	2962877	3887219	3646464	3495070	2916299	2921546	2465299	2784870	2417949	2838902
2823	negative	NA	NA	LysoPC(17:0);LysoPE(0:0/20:0);LysoPE(20:0/0:0);rbomycin	-10.0903480378459;-10.0903480378459;-10.0903480378459;15.1177426736372	MS1 mz matched	508.336	185.325	62061.9	85806.1	73318.8	77713.2	83254.4	78148.8	86103.5	100313	78136.6	62040.9	72464.2	74619.9	251550	52089.6	60577.4	60607.6	89707.8	67328.3	137313	77199	69066.5	106864	107703	127434	184022	113498	65159	39882.9	39305.9	127368	133194	94185.6	129148	141182	59152.7	88712.4	427959	160033	53514.6	47530.3	145823
4299	negative	NA	NA	PG(18:0/20:3(5Z,8Z,11Z));PG(18:0/20:3(8Z,11Z,14Z));	-0.918485808127463;-0.918485808127463;	MS1 mz matched	816.57	142.803	698190	555155	605928	550684	489953	609564	482078	514394	726696	506120	579614	531607	458121	699086	539108	522173	617286	586685	598958	687056	500436	906698	632435	891742	722436	521835	699101	628583	544919	611762	499495	517423	622300	684272	634176	658352	538877	542064	460399	657004	484486
1244	negative	NA	NA	Anagrelide;Fluorofelbamate	-11.7147230641137;-3.5144457387207	MS1 mz matched	293.032	225.035	25330	34978.8	42865	33785.9	36186.6	30376.1	31448.2	32437	34865.3	31218	27529.6	24520.7	42887	14708.1	27312.5	25250.2	31772.9	28700.5	26399.6	10798.8	11805.5	23850.5	46774	10600	57342.5	29434.6	12803.1	25005.4	35416.4	25925.1	51861.4	22137.7	26437.5	33305.8	25312.8	23831	21422.8	27927.1	28577.8	32163.2	32269.5
66	negative	2-Methyl-3-hydroxybutyric acid	0.705	NA	NA	MS2 forward	117.057	137.059	88343.2	94302.2	113706	119434	104376	92824	84812.2	112332	115036	134004	115753	117366	255930	55346.4	48042	140979	164168	42278.5	118924	49036	26792	81856.4	189348	36733.1	48118.3	69413.2	37630.9	38067.1	89992.2	77367.1	37985.7	104797	62521.2	203753	213560	63754.1	143507	115182	35754.9	59046.3	37955.2
4381	negative	NA	NA	PC(20:3(5Z,8Z,11Z)/20:3(5Z,8Z,11Z));PC(18:1(9Z)/22:5(4Z,7Z,10Z,13Z,16Z));PC(20:3(8Z,11Z,14Z)/20:3(5Z,8Z,11Z));PC(18:2(9Z,12Z)/22:4(7Z,10Z,13Z,16Z));PC(20:4(5Z,8Z,11Z,14Z)/20:2(11Z,14Z));PC(22:5(7Z,10Z,13Z,16Z,19Z)/18:1(9Z));PC(18:4(6Z,9Z,12Z,15Z)/22:2(13Z,16Z));PC(18:1(11Z)/22:5(4Z,7Z,10Z,13Z,16Z));PC(20:3(8Z,11Z,14Z)/20:3(8Z,11Z,14Z));PC(22:4(7Z,10Z,13Z,16Z)/18:2(9Z,12Z));PC(22:5(7Z,10Z,13Z,16Z,…	-20.9397037501742;-20.9397037501742;-20.9397037501742;-20.9397037501742;-20.9397037501742;-20.9397037501742;-20.9397037501742;-20.9397037501742;-20.9397037501742;-20.9397037501742;-20.9397037501742;-20.9397037501742;-20.9397037501742;-20.9397037501742;-20	MS1 mz matched	832.566	40.3115	9571.58	13690.8	10884.7	12511	11758.3	12831.7	11017.4	11092.2	9340.2	8491.76	10468.2	10149.8	10107.3	23680.5	8447.06	7412.56	16297.5	16983.4	13458.6	22305.8	6809.44	23101.5	21019.5	11355.3	14091.8	17728.4	24891.6	16535	6119.98	14171.9	17531.4	11482.4	26446	12202.5	14863.7	17547.8	14105	12985.8	15681.8	11692.6	16244.1
2275	negative	NA	NA	Phenethyl rutinoside;Athamantin	17.0812995275489;-18.490736384511	MS1 mz matched	429.191	190.143	6633.89	6549.92	4424.42	6065.67	6159.67	5475.11	5104.65	4451.67	5909.61	6374.36	5000.48	5218.54	1179.25	1748.99	19556.4	8271.88	3324.87	4707.2	2659.26	2238.09	4203.58	2206.9	2362.03	4757.67	16827.3	3749.76	2771.55	31904.3	4089.5	2845.54	3807.88	1580.85	10994.6	2322.69	2752.69	2724.78	2713.8	988.465	15704.3	3568.25	29489.6
2697	negative	NA	NA	NA	NA	Unmapped	490.852	315.041	7864.86	9532.89	13453.3	11436.9	12967.7	11779.4	10937.8	11004.9	12076.2	10974.2	9883.95	10514.5	15775.4	9120.58	7152.75	9976.4	8734.64	18517.9	10529.1	7025.38	11789	10078.5	13736.5	17912.1	10670.4	9010.04	14247	11668.5	11884	11650	22161	9674.96	10499.1	13301.2	16832.8	9927.05	11954.6	11311.4	9982.08	5512.27	14667.5
3292	negative	NA	NA	NA	NA	Unmapped	580.163	29.182	14165.1	14484.5	12742.4	13184.4	11332.4	8438.94	10612.5	11446.1	11785.2	13780	11992.4	8653.98	1574.75	6034.19	5232.87	5643.43	35973.8	2135.4	4271.77	15725.5	1067.84	1952.66	4285.45	2816.31	5571.1	4533.28	10266.5	885.538	1239.3	5122.68	4701.68	4694.73	4538.49	25164.8	2021.64	8023.87	158250	1848.17	1406.72	4895.88	8839.05
4503	negative	NA	NA	PG(18:0/22:4(7Z,10Z,13Z,16Z));	-11.3546014430425;	MS1 mz matched	861.541	187.859	68358.5	101986	117630	116296	107433	125708	113313	117216	99292.2	110544	96732.4	38648.3	139314	111295	50286.5	79193.9	110490	63944.8	54444.4	129907	54511.8	237558	131794	79419.6	67755.6	128757	125155	51949.2	30926.2	49284.2	155645	75623	115896	128060	57344.3	122203	84924.4	73316	32273.7	32999.1	152216
575	negative	NA	NA	5-Hydroxy-2-benzyl-1,3-dioxane;Ethyl 4-ethoxybenzoate;(R)-3-Hydroxy-5-phenylpentanoic acid;Isobutyl salicylate;4-Methoxybenzyl propanoate;2-Benzyl-5-hydroxymethyl-1,3-dioxolane;[2-(2-Methylphenyl)-1,3-dioxolan-4-yl]methanol;Zingerone;Butylparaben;Ethyl 4-methylphenoxyacetate;2-(3-Methylphenyl)-1,3-dioxan-5-ol;3-Hydroxyphenyl-valeric acid;2-(2-Methylphenyl)-1,3-dioxan-5-ol;2-(4-Methylphenyl)-1,3-d…	24.2444015006172;24.2444015006172;24.2444015006172;24.2444015006172;24.2444015006172;24.2444015006172;24.2444015006172;24.2444015006172;24.2444015006172;24.2444015006172;24.2444015006172;24.2444015006172;24.2444015006172;24.2444015006172;24.2444015006172;24.2444015006172;24.2444015006172;24.2444015006172;24.2444015006172;24.2444015006172;24.215033620181;24.215033620181	MS1 mz matched	215.073	230.829	19616	21231.7	31466.8	26422	25655	26910	27520.7	21145.6	26264.5	21201	23726.3	176066	1285.01	5888.64	77146.9	160397	2072.59	1155.89	12889.2	1752.59	27489.3	29397	1351.79	10438.4	38441.2	1841.55	2460.27	2260.31	115860	1854.01	97958.5	1961.47	2991.46	3376.91	5648.85	6854.19	1231.66	2628.41	719.515	30045	78909.1
1007	negative	NA	NA	NA	NA	Unmapped	269.149	193.565	15016.3	23414.1	26770.9	25775.8	25516.8	28696.8	26004.3	28341.5	25747.1	25154.4	24689	24926.8	11546.6	8537.06	18881	38652.6	14731.9	20230.5	13365.1	8078.21	22951.4	10122.2	11107.2	33755.2	35517.9	13792.2	27681	23906.7	24792	6301.46	31863.1	5593.93	22984	10355.4	14640.8	21590.4	12644	12004.2	7504.4	21049	35543.4
2280	negative	alpha-Tocopherol (Vitamin E)	0.7176	NA	NA	MS2 forward	429.37	32.485	4801.6	3711.1	4168.91	6138.61	5727.72	4149.72	4874.17	4885.29	4382.6	4960.36	4931.21	885.222	2243.62	7576.98	946.887	4435.3	4206.41	1793.81	2730.24	3929.15	1801.8	9302.53	5100.23	8423.7	1556.56	9713.64	7296.04	1578.68	588.196	6651.74	5857.49	8831.15	8988.68	8198.08	2650.61	7909.4	2760.77	593.568	1262.8	3144.43	7689.75
3688	negative	NA	NA	NA	NA	Unmapped	660.209	35.0825	5786.21	9879.61	9604.42	10357.1	9769.51	8689.56	8951.89	8544.42	8419.12	10712.5	8838.4	27103.4	708.732	2044.78	14943.1	1305.63	846.536	4454.6	1220.78	2246.29	14334.1	1253.52	2942.12	1187.58	64627	850.501	1481.27	22635.8	9577.73	193.69	1304.74	745.318	1279.55	432.996	2599.68	4054.93	1514.39	143.457	26927	15941.8	4596.8
1890	negative	NA	NA	NA	NA	Unmapped	372.272	35.763	56221.5	35808.5	38617.5	36553.3	39096.7	37577.1	35959	36390.5	42870.7	42743.6	40450.2	2705.93	1522.64	6526.17	3309.13	10712.4	5857.5	5766.01	5580.44	10937.6	2902.36	7483.86	6789.66	3914.51	4801	7599.01	4226.76	2376.13	1450.2	6362.84	5660.28	10294.3	6355.93	6116.56	2706.24	5053.61	8196.88	8286.45	1255.72	4022.76	3740.1
5055	negative	NA	NA	NA	NA	Unmapped	1108.51	349.125	19152.7	18637.1	21176	24507.1	25410.7	27614.4	22344.7	21437.8	17983	19376.4	19045.9	25085.6	23221.6	18118.5	24096	22272.3	18505.4	23858.6	21355.8	18551.6	19905	25407.5	24451.8	21378.1	21053.8	18309.3	24973.8	28597.6	27040.4	24627.7	27003.2	22634	20171.5	22251.9	25755.3	23676.3	25947	16631.4	28336.8	15630.6	23821.5
4292	negative	NA	NA	PE(22:5(7Z,10Z,13Z,16Z,19Z)/20:3(8Z,11Z,14Z));PE(20:3(5Z,8Z,11Z)/22:5(7Z,10Z,13Z,16Z,19Z));PE(20:3(8Z,11Z,14Z)/22:5(4Z,7Z,10Z,13Z,16Z));PE(22:5(7Z,10Z,13Z,16Z,19Z)/20:3(5Z,8Z,11Z));PE(22:5(4Z,7Z,10Z,13Z,16Z)/20:3(8Z,11Z,14Z));PE(20:4(8Z,11Z,14Z,17Z)/22:4(7Z,10Z,13Z,16Z));PE(20:2(11Z,14Z)/22:6(4Z,7Z,10Z,13Z,16Z,19Z));PE(20:4(5Z,8Z,11Z,14Z)/22:4(7Z,10Z,13Z,16Z));PE(22:6(4Z,7Z,10Z,13Z,16Z,19Z)/20:2(…	7.68858668574454;7.68858668574454;7.68858668574454;7.68858668574454;7.68858668574454;7.68858668574454;7.68858668574454;7.68858668574454;7.68858668574454;7.68858668574454;7.68858668574454;7.68858668574454;7.68858668574454;7.68858668574454;	MS1 mz matched	814.553	142.681	23733.5	19253.1	21525.5	26588.8	17676.8	21002.3	20018.2	20799.3	26415.6	23698.3	17245.8	23061.2	26654.5	27443.7	19453.6	39603.3	20129.4	17632.5	43172.4	21009.1	23947.6	30645.2	24395.2	27932.6	31113.2	22166.9	25438	26314.2	22278.2	23736.7	17888.7	30640.7	20859.1	24784	18069.4	20560.4	26797.7	20363.5	15710.2	37234.3	13142.9
2655	negative	NA	NA	NA	NA	Unmapped	485.359	38.973	14162.7	13789.5	12158.4	16487.7	13052.2	16899.9	12298.2	11813.4	13586	13626.8	10044.9	6839.23	2907.03	3336.85	20579.7	8357.43	8557.35	8127.39	6981.02	10789.6	31559.5	3456.37	5725.87	17693.4	16016.9	4673.8	7102.34	22216.1	3891.22	5053.59	29718.7	4461.37	9312.95	28820.1	12782.3	18096.8	10629	6024.29	5195.61	35567.4	4144.33
4515	negative	NA	NA	NA	NA	Unmapped	864.569	137.676	132653	150128	153607	143042	125421	142460	142465	130593	133165	107766	191053	153794	78285.4	148787	150852	145956	73548.6	97575.7	160605	137764	147413	214583	119586	100127	199715	102779	191576	150616	103265	220725	55723	180041	155101	148100	130330	119298	180592	158826	163126	145856	204494
3611	negative	NA	NA	S-(9-hydroxy-PGA1)-glutathione;S-(11-hydroxy-9-deoxy-delta12-PGD2)-glutathione;Sepiolite	-15.9653455763674;-15.9653455763674;0.60313322676113	MS1 mz matched	644.795	315.497	2127.95	1980.71	2367.29	2638.9	3099.96	2466.25	2777	2450.78	3188.82	2467.75	2272.16	2283.42	3720.05	2411.76	1600.31	2488.65	1719.53	4557.7	2582.6	1587.22	2911.41	2119.99	2848.07	3036.27	2026.69	2056.53	2768.2	2874.85	2790.33	2328.48	4265.93	2173.41	2295.2	2967.6	3864.49	1872.75	2298.15	2440.76	2437.93	1314.56	2791.89
3435	negative	NA	NA	Pateamine;Pateamine A	5.22228	MS1 mz matched	607.3	27.2465	6962.44	4883.3	6870.59	5883.66	5530.97	6350.88	6769.14	5492.05	6027.71	5088.81	4311.83	10076.9	7497.12	5155.92	6618.64	8244.67	5510.38	6408.89	4713.76	6405.25	4824.98	5038.36	5502.03	6976.75	6274.05	4387.33	9296.32	3072.17	4538.18	8702.72	6454.23	5376.99	6531.02	3969.16	4804.36	5388.45	2024.92	2771.33	3290.96	8237.74	6591.08
4059	negative	NA	NA	PC(20:1(11Z)/14:1(9Z));PC(20:2(11Z,14Z)/14:0);PE-NMe(18:1(9Z)/18:1(9Z));PC(18:1(11Z)/16:1(9Z));PE(15:0/22:2(13Z,16Z));PC(16:1(9Z)/18:1(11Z));PC(18:2(9Z,12Z)/16:0);PE(22:2(13Z,16Z)/15:0);PC(18:1(9Z)/16:1(9Z));PC(16:0/18:2(9Z,12Z));PC(16:1(9Z)/18:1(9Z));PC(14:1(9Z)/20:1(11Z));PC(14:0/20:2(11Z,14Z));	-19.2067408621746;-19.2067408621746;-19.2067408621746;-19.2067408621746;-19.2067408621746;-19.2067408621746;-19.2067408621746;-19.2067408621746;-19.2067408621746;-19.2067408621746;-19.2067408621746;-19.2067408621746;-19.2067408621746;	MS1 mz matched	756.548	40.939	7104.9	9236.92	7423	10166.9	11294.4	7928.58	9012.72	9019.26	7724.3	7558.29	9388.77	7840.14	7230.81	20706.1	4394.77	4920.6	15060.1	14316	11442.4	30167.8	5694.41	20891	21694.5	10553.2	8983.42	19294	23846.6	15719	5123.77	6954.88	14913.3	9887.87	23094.5	14495.8	12580.5	15568.4	12506.8	11984.7	11799.5	9062.01	15552.7
4271	negative	NA	NA	PS(18:2(9Z,12Z)/20:3(8Z,11Z,14Z));PS(18:1(9Z)/20:4(5Z,8Z,11Z,14Z));PS(20:3(8Z,11Z,14Z)/18:2(9Z,12Z));PS(20:4(5Z,8Z,11Z,14Z)/18:1(9Z));	-0.741673451675114;-0.741673451675114;-0.741673451675114;-0.741673451675114;	MS1 mz matched	808.52	154.043	7055.9	9889.01	10579.5	12342.4	9037.4	8574.79	10209.6	9398.52	11005.7	8795.94	11238	13114	10761.3	11984.3	10310.5	16364.5	11398.5	8307.18	11987.4	7729.58	13207.2	10292.8	11308.9	13530.5	17830.4	10517	11586.2	13767.4	10167.5	6966.83	10775.7	7365.37	12530.1	14486.4	10804	13752.6	11239.4	11109.1	10258.8	14958.4	15058.7
2608	negative	NA	NA	Emetine	-20.404	MS1 mz matched	479.28	27.729	213781	190488	177528	163722	170226	168502	236419	231409	217880	161277	168814	399469	225167	215611	214431	297783	150154	162663	183664	204434	137118	177996	215843	187358	187623	221314	233640	154235	179357	317841	215345	240284	201624	183143	194217	211100	65386	123135	128709	313987	187666
1247	negative	5'-O-methylthymidine	0.8434	NA	NA	MS2 reverse	293.053	147.354	19249.3	31895.5	32450.1	35501.3	35383.4	33214.8	35330	38075	30824.4	31997.8	33354.8	43458.3	34751.8	33037	40130.9	34147.4	30604.1	25099.8	28220.6	32238.7	47359.8	19518.1	32465.7	36993.5	19685.6	25786.3	46336.1	45995.7	35935.1	39372.4	21141	34317.8	30799.7	21564.1	45348.3	34734.6	47812	36840	52979.5	26987.9	25961.2
3923	negative	NA	NA	PE(P-18:0/18:4(6Z,9Z,12Z,15Z));PE(18:3(9Z,12Z,15Z)/P-18:1(11Z));PE(P-18:1(9Z)/18:3(6Z,9Z,12Z));PE(20:4(8Z,11Z,14Z,17Z)/P-16:0);PE(18:4(6Z,9Z,12Z,15Z)/P-18:0);PE(18:3(6Z,9Z,12Z)/P-18:1(11Z));PE(18:3(9Z,12Z,15Z)/P-18:1(9Z));PE(P-16:0/20:4(8Z,11Z,14Z,17Z));PE(18:3(6Z,9Z,12Z)/P-18:1(9Z));PE(P-18:1(11Z)/18:3(9Z,12Z,15Z));PE(20:4(5Z,8Z,11Z,14Z)/P-16:0);PE(P-16:0/20:4(5Z,8Z,11Z,14Z));PE(P-18:1(11Z)/18:3…	-18.9304988201739;-18.9304988201739;-18.9304988201739;-18.9304988201739;-18.9304988201739;-18.9304988201739;-18.9304988201739;-18.9304988201739;-18.9304988201739;-18.9304988201739;-18.9304988201739;-18.9304988201739;-18.9304988201739;-18.9304988201739;	MS1 mz matched	722.507	139.188	65864.1	58982.9	70876.2	65584.5	86263	56504.6	65393.6	56938.9	57547	61039.4	50813.3	26921	39426.3	47314.4	60563.4	27887.7	53414.7	62609.1	51987.3	53477.9	26922.2	95102.3	31875.2	44637.8	20774.8	61253.1	72482	69921.2	29312.9	40924.4	25892	26986.3	97827.4	35314.4	31167.4	70993.7	54993.2	41195.1	83370.8	30015.8	141214
2253	negative	NA	NA	Austalide L;	-17.5760168941519;	MS1 mz matched	427.212	73.043	178276	211628	218706	220522	181399	173701	157126	204618	206436	157171	252063	198109	77021.7	57838.7	341123	273724	474150	167725	95309.5	309250	123358	397356	83651.3	221486	302908	173260	128748	144607	119006	86679	325186	51789.4	194233	90023.1	81659.5	121248	75432.7	61548.1	253321	241150	111068
2745	negative	NA	NA	5,10-Methenyltetrahydrofolic acid;	-0.728103083030377;	MS1 mz matched	495.176	29.171	21194.4	19911.6	28584.3	22268.2	22757.5	22840.9	23400.1	20488.5	19909.7	17424.9	16590.8	17771.6	2381.14	8018.99	83114.6	14019.1	34282.2	37694.2	3917.67	14784	13035.1	4554.57	7449.78	12037.4	13327.1	33326.6	29106.3	28820.4	55963	3404.05	14307.9	9168.94	13582.6	32958.5	12137.2	5222.07	68507.3	5936.65	22642.6	6482.61	17210.1
4624	negative	NA	NA	NA	NA	Unmapped	892.565	137.36	37972.8	50491	45775	54500.6	38770	41415.4	51068	49771.5	41562.6	33050.4	50190.2	36969.9	102635	30825.6	37791.7	31751.4	15145.1	12883	23007.9	12682.6	29204.8	48625	20979.5	38254	49688.1	33205	47958	25614.7	23435.9	35930.2	95208.7	25106.5	61090.8	43131.4	24119.8	36676.5	46085.7	24030.7	53435.2	20631.8	64434.3
1443	negative	NA	NA	Fruticosonine	1.7619	MS1 mz matched	311.221	158.264	152471	137065	140355	84997.6	144333	136757	139206	151860	168716	129406	128065	441796	29470.8	103275	257170	421925	200796	43392.5	114395	117866	108715	95004.2	35794	98789.1	136940	171242	60204.8	51667	164903	128495	185524	69320.2	49389.2	82427.6	94975.5	79221.9	16893.9	70425	46626.7	778348	156677
2181	negative	NA	NA	Phenylethyl primeveroside;Calophyllolide	-7.80237325307754;6.24756104835388	MS1 mz matched	415.158	303.123	48009.1	50795.8	53047.6	56224.7	49649.4	58689.5	54947.8	60864.5	77621.4	67730.1	53129.1	97020.4	1745.92	5786.71	252610	48220.7	16334.4	2288.07	3543.8	24319.7	217909	3984.57	614.362	109248	38857.1	65674.2	53621.3	100316	56803.8	1485.88	16287.7	3963.86	5151.01	36884.3	122911	10837.6	3244.47	5688.73	251225	78623.6	4944.49
4477	negative	NA	NA	NA	NA	Unmapped	854.586	137.304	34432.5	39545.2	42413.3	37814.5	34112	32899.1	25851.9	33995.7	39303.9	27175.3	29866.3	23690.2	49197.9	25604.2	35663.8	34052.9	32921.1	51434.1	46917.7	29085.6	18903.4	39913.7	28237.4	27982.3	18167.2	24303.3	29041.5	37770.3	18064.6	39644.1	38878.8	28945.2	46520.5	36768.5	22792.8	33611.3	72941	34917	30803.1	20911.8	35501.1
3013	negative	NA	NA	6,8a-Seco-6,8a-deoxy-5-oxoavermectin ''1b'' aglycone	-0.7216	MS1 mz matched	535.305	32.361	28056.3	26121.6	21516.8	19426.6	18273.5	18966.7	18851	21893.6	18024.7	20584.1	20782.3	18717.8	12771.7	11972	14875.4	25264.3	23592.9	24032.5	13990.5	19795.1	18058	33537.2	32054.5	22344.6	20708.4	24330	30398.8	14168.4	12989.7	14257.6	13880.9	10494.5	24766.7	34010.6	12883.1	14962	12380.1	12711	14422.9	27097.2	27771.4
3361	negative	NA	NA	NA	NA	Unmapped	593.322	27.2065	9021.76	10558.3	8929.73	7221.73	5869.62	9387.24	9730.25	8822.15	7870.5	7709.98	8091.44	6814.26	6689.94	10061.6	6776.6	11605.5	8806.4	8362.29	6072.39	6726.48	9100.55	7632.23	8448.72	8020.93	10928.1	15393.9	10530.1	5107.45	5578.33	7281.49	7516.46	5957.73	9729.66	6063.99	3274.07	5189.21	3777.84	5739.37	4672.99	15645.6	10259.3
789	negative	Phosphorylcholine	0.8862	NA	NA	MS2 forward	242.079	379.122	2969.16	2319.26	2186.17	2083.37	2177.1	1916.05	1962.6	1973.01	2056.39	1779.48	1851.5	1870.23	11937	3279.16	1476.66	1065.11	2278.68	2170.24	1689.12	2528.71	1258.57	1898.62	2811.45	2033.91	2993.11	1638.59	1869.79	1275.72	1938.66	1911.54	5881.15	1707.98	3138.01	2930.33	2156.73	1390.18	3136.33	2416.58	1251.88	1121.11	2130.8
2095	negative	NA	NA	NA	NA	Unmapped	400.304	35.107	99877.3	66408.5	73778.9	69225.7	69336.1	75572	64737.7	61423.7	74545.7	89849.3	83545.9	7060.39	1987.91	7362.7	7585.24	11091.1	8696.92	6549.9	6367.12	5065.42	7263.45	8413.99	7007.99	7641.65	7927.75	4629.28	2675.77	5330.46	4120.15	6029.1	5735.19	9812.48	4102.9	7635.09	3418.54	6396.74	6320.63	12438.9	3064.86	5978.47	8828.44
3055	negative	NA	NA	NA	NA	Unmapped	539.427	38.417	38929.1	44537.5	38260.8	43450	50128.1	39020.4	50307	55398.8	60304.7	42646.6	45680.3	38993.9	14217.1	24944.5	68618	36004.7	102036	49575.8	75481.6	116480	36723.4	60312.1	32806.5	30234.7	27358.2	15315.7	9842.06	26437.4	12580.4	34804.9	25507.6	33980.7	81458.9	71905.4	20830.2	43171.6	91381.2	35325.5	31610.5	39570	45838.6
1326	negative	D-Lyxose	0.9799	NA	NA	MS2 reverse	299.096	301.644	3994.82	3478.44	3371.03	4147.46	2686.32	2703.23	2691.78	3427.17	3621.72	2931.94	3296.38	4724.11	2111.94	3961.8	4433.35	3037.29	4300.59	2893.91	2460.42	4030.57	3957.31	3224.62	1756.28	5064.94	1726.88	3877.24	5360.86	4475.17	2576.99	3436.67	1504.07	1971.72	5689.09	2181.05	5876.32	3003.19	3964.27	5602.44	7912.92	3230.7	2661.55
4415	negative	NA	NA	PG(18:0/20:3(5Z,8Z,11Z));PG(18:0/20:3(8Z,11Z,14Z));	-0.918485808127463;-0.918485808127463;	MS1 mz matched	840.57	138.745	259949	247074	284553	266046	317328	260824	389361	256157	278875	237740	253907	412422	172851	238992	319192	350274	268455	256686	276696	237674	257734	226618	255000	160417	241139	168284	232064	312176	268069	331329	201229	266950	251118	321080	214026	219069	355599	303942	253488	273300	278498
958	negative	NA	NA	NA	NA	Unmapped	263.022	46.8335	109359	107524	111929	105953	104316	101390	67953	110838	97570	70647.3	102189	68111.2	40379.2	33151.7	107182	58286.9	44423.2	772582	31842.6	26040	111692	33955.2	32908.8	76830.8	70385.6	35901.3	78030.6	144595	221292	34552.5	59161	35846.1	46280.1	52491.2	50680.3	34889.8	39340.9	36399.6	76343.3	44899.3	123953
3768	negative	NA	NA	NA	NA	Unmapped	685.523	175.175	56591.8	73436.4	62843.7	57281.4	51322.2	62787	59773.2	61169.7	43263.3	68907	76365.4	82117.1	54678.7	74762.5	78109.4	82828.1	69841.9	67084.4	67426.4	73061.5	81053	68605.5	53904.9	82758.8	56579.1	64156.4	60177.4	74013.9	67283.9	116796	70924.1	57649.2	82366.3	90109.6	56528.4	75091.1	70371.7	47574.7	58756.2	99486.6	64280.6
4488	negative	NA	NA	PS(18:0/20:0);	-17.1924361572112;	MS1 mz matched	857.07	234.965	4347.15	3576.75	4086.48	3582.77	4024.93	3103.43	2966.63	4008.63	3876.56	2774.58	2862.83	4169.81	4038.51	4031.05	3908.05	3654.67	3766.58	3758.59	3846.65	3999.11	3529.16	4673.32	3808.41	4452.63	2751.9	4895.32	3806.71	2991.55	3662.68	4035.33	3598.87	3553.01	4584.6	3984.34	4822.13	4293.56	4150.45	4925.15	3576.62	2217.42	3834.97
3749	negative	NA	NA	NA	NA	Unmapped	679.307	193.278	2145.06	3586.49	3298.46	3672.27	2887.61	2723.45	3371.89	3707.36	2931.47	3779.22	3175.45	5335.28	1059.17	906.852	5339.61	3529.84	4296.57	1047.61	2151.84	777.937	1230.08	1597.71	1398.89	2031.02	7700.65	2815.94	1527.09	1248.44	2866.04	1378.85	483.217	1015.9	1572.97	1499.95	1112.92	1369.28	63.2149	759.108	2742.57	5045.47	3015.58
3339	negative	NA	NA	NA	NA	Unmapped	590.241	35.0345	8453.65	10206.2	11699.8	8853.96	13802.4	12867.4	11159.1	13287.7	10869.3	10698.5	9916.76	7887.66	1744.28	13413.8	9525.86	4708.64	8715.94	9999.38	6154.47	1429.72	6187.07	3089.57	4618.69	4759.94	24833.7	11859.5	29883.2	3587.37	8400.12	4481.93	4283.34	2996.67	5266.52	3002.66	18870.1	12568.3	587.571	3593.84	3001.3	41663.3	9697.82
4407	negative	NA	NA	NA	NA	Unmapped	838.554	139.215	23444.2	18638.8	27191.9	27960.1	27319.1	26866	18669.6	22107.5	22254.8	29936.6	22595.8	18378.9	20315.1	34061.5	25423.8	71810.6	19299.9	8762.03	32156.8	16317.1	15772.6	28335	27636.5	20958	44636.1	23330.3	14191.8	37942.1	18761.9	51762.1	16592.8	54820.8	68722.8	18485.7	20969	20645.3	38126.9	41651.2	29927.9	53219.7	62066.9
4730	negative	NA	NA	NA	NA	Unmapped	944.503	349.125	19490.1	22894.8	24017.1	30276	26990.3	34344.4	31356	31264.5	29057.2	27891.9	31457.8	35684.1	28326	23287.2	34114.9	29724.4	23731.8	33249.6	33180.7	23727.3	31004.2	31369	31032.7	29545.4	34502.2	24096.7	28362	31456.2	35513.4	37007.7	34529.7	31439.5	24686.4	28407.7	31387.7	30332.6	32559.9	31322.7	33185.3	24679.4	30064.2
5116	negative	NA	NA	Cyclolinopeptide G;	11.0878479919342;	MS1 mz matched	1149.51	349.052	15629.2	19828.9	22967.1	22479.2	22263.8	24069	20626.4	19800.1	18685.9	19177.5	13514.4	24440.9	23033.2	19378	23505.1	17880.7	20930	23505.3	16996.3	21865.8	20986.8	23408.7	21801.4	19426.5	20093.9	19345	25832.4	26995.2	20348.3	21116.1	27377.1	19843.3	18957.3	22238.1	22993.9	19580	20206.1	16839.2	22030.7	15034.6	22928
1227	negative	NA	NA	NA	NA	Unmapped	291.005	349	55353.4	57471.6	48710.5	38594.9	40750.4	45405.9	41784.7	37658.2	36486.1	39328.4	44254.7	41809.3	55117.2	59526.1	44902.3	47012.4	58285.1	42213.4	38946	59926	38043	50926.3	47358.8	41284.6	35381.2	63238.8	44371	50777.5	44367.6	43640.9	44946.7	45584.6	63559.5	52791.1	48606.4	36780.7	40568.5	38125.9	48517.1	36842.1	38736.4
295	negative	L-Arginine	0.9989	NA	NA	MS2 reverse	173.105	501.365	2577.81	2234.97	3076.54	2394.52	3280.59	1970.04	2572.89	3116.15	2708.68	2316.34	2267.94	3883.53	5811.99	2000.53	2866.14	1749.58	3289.88	3841.52	2385.98	2933.16	2614.38	3175.14	3263.56	3940.14	2451.25	4422.93	4907.46	4515.47	3774.62	1943.55	7100.84	2725.59	4147.34	3670	3018.53	2398.23	4745.78	3795.18	2747.85	1511.7	4790.28
1274	negative	Acadesine (Drug)	0.9991	NA	NA	MS2 reverse	295.05	147.369	6999.62	10431.5	11943.9	11801.2	13804.5	12095.1	13264.9	13514	11007.8	11343.2	11246.4	15314.9	11559	12858	14676.1	12568.9	11151.6	8759.81	9710.84	11452.7	16265.8	7866.27	11532.7	12481.7	6880.14	10069	16180.6	15235.4	13559.1	13942.1	8400.43	14008.6	10655.2	8577.98	14774.9	12746.4	15998	13206	18769.9	10636.3	9305.18
3218	negative	NA	NA	NA	NA	Unmapped	566.152	445.351	3247.97	3053.69	2633.41	2927.78	3019.24	3545.66	4116.52	4224.01	2828.49	2983.35	2942.81	2517.39	3368	7651.07	15615.2	3082.75	5594.06	2536.91	2106.14	4925.93	2750.01	3180.51	1257.38	4731.2	1699.64	3486.01	5109.39	6664.62	3617.85	3895.43	1314.18	3455	3967.2	1528.27	6893.82	1594.07	928.605	1516.12	4354.1	1351.22	614.536
1891	negative	NA	NA	NA	NA	Unmapped	373.007	349.019	78565.6	98286.7	73952.7	74104.2	68121.9	61852.8	61669.7	70180	62026.3	62727.2	59033.3	75333.6	82856.2	91576.3	66043.5	61306.5	90969.5	65049.9	63512.9	98116	63817.2	82800.3	82419.2	59837.8	58202.8	87929.4	66939.4	79596.8	70131.7	62496.3	78842.8	70929.5	91266.6	83525.4	78076.6	57857.3	68523.1	60447.4	63140.1	51519.2	67201.5
4088	negative	NA	NA	NA	NA	Unmapped	763.547	172.859	71283.6	71945.3	102119	64330.5	65516.1	71791.9	69447.6	82367.8	65019.4	67555.4	58919.8	56788.1	62761.8	57966.9	77906.4	71531.9	70356.1	50224.3	102625	82533.4	61729.7	90573.2	77533.9	69222.8	59532.9	57813.3	76788.2	105161	62908.4	98126.3	80544.4	70211.6	67123.6	109166	63913	83323.3	104774	135389	67544.6	76210.4	71842.2
1988	negative	NA	NA	NA	NA	Unmapped	387.05	284.106	3759.32	5068.88	5748.61	5391.08	6439.04	5930.9	6364.75	6002.89	7110.28	6833.58	6919.95	5865.04	6727.31	5646.56	9531.88	8622.88	4706.41	11035.6	4420.19	1660.81	8840.2	7872.46	6073.36	3909.02	8242.38	4302.35	5891.31	7404.26	14190.6	6491.32	6398.3	7916.6	2611.55	3856.18	4082.09	5202.88	10369	9107.27	6233.2	3769.75	9251.81
560	negative	NA	NA	NA	NA	Unmapped	214.065	367.152	14938.7	12164.1	10573.9	10511.1	11425.6	9822.04	11154.2	9895.06	9426.81	9586.02	8342.65	7170.2	15281.2	10040.2	8511.18	7298.56	11246.5	11862.9	12293.9	11436	10274.8	21813	9952.81	13749.9	5433.68	16446.9	16585	10917.9	7757.44	10706.9	15648.6	10934.8	18024.2	13929	12194.6	8011.4	21134.9	12295.7	9876.3	6410.4	16859.8
2470	negative	LPA(18:1(9Z)/0:0)	0.9767	NA	NA	MS2 forward	457.232	240.506	6267.89	8936.8	10289.1	10702.8	9658.04	9106.28	11238.5	9414.77	10539.8	7679.16	7694.92	5032.06	12127.4	13710	8980.88	2964.87	8465.15	14941.1	9067.56	3632.91	6746.74	8714.94	8067.08	8225.59	9707.43	5933.06	5134.63	9531.78	10178.9	4519.05	16950	5447.16	11977.7	10508.9	5540.02	5983.98	7643.27	13310.1	5218.31	9488.42	19366.6
2689	negative	NA	NA	L-2-Aminoadipate adenylate;Barringtogenol C;Meliantriol;Alisol A	2.44717267940323;-5.71002300727184;-5.71002300727184;-5.71002300727184	MS1 mz matched	489.354	106.258	111238	82656.6	111183	77637.4	90855.4	87914.7	77412.5	73404	94246	90949.2	66084	101441	36092.5	32807	149886	56813.3	93353.1	80495	138393	138352	117540	65567.6	62403.5	69455.9	176670	101807	40337	62706.6	105988	33274.8	39363.9	110248	88239.4	102095	73518.3	62956.4	228382	97238.2	78638.9	68670.3	102819
325	negative	D-Fructose	0.9771	NA	NA	MS2 forward	179.054	189.658	5020.36	4766.82	5165.28	4367.48	3519.05	3211.12	3728.06	3904.37	3970.99	4539.75	3282.16	1046.02	1795.13	648.937	11799.7	894.62	3785.1	4129.8	1672.07	2115.22	3113.12	1622.92	3294.72	2197.31	4788.17	2495.93	7095.85	11604.5	2046.87	14075.7	9944.79	2146.2	358.351	8428.87	3391.7	3218.35	11304.8	2575.29	7087.2	1873.36	898.933
3242	negative	NA	NA	NA	NA	Unmapped	572.238	194.198	6843.2	12989.7	13470.6	12827.4	12699.9	13441.6	12905.1	14226.6	13484.2	12111.9	10603.5	9901.72	4629.4	1772.05	7408.78	4458.14	12900.7	2481.39	1741.96	3901.61	5830.18	4858.17	1102.06	3880.07	13053.6	4591.77	23878	1487.74	4216.22	1040.12	769.936	3812.76	9007.18	1232.78	8501.69	3266.98	1036.27	2738.26	5371.44	23682.8	2587.73
2935	negative	NA	NA	NA	NA	Unmapped	523.207	28.435	8937.23	11892	14240	11391.9	10628.6	16250.3	14564.2	14863.5	13191.4	12474.1	11739	11996.1	1668.11	3704.57	106632	24483	11425.6	10059.5	3613.4	6245.97	19892.7	4596.9	4776.64	9009.29	18640.4	7462.58	14603.8	69414.9	25074.9	3142.08	11830.3	5055.88	28433.7	5256.98	3577.3	2056.22	3554.69	2893.09	32985.6	5904.02	51964.1
119	negative	L-Asparagine	0.6765	NA	NA	MS2 forward	131.047	371.007	6625.46	6902.67	5409.74	5317.2	6053.7	5048.49	5168.5	5209.31	7802.49	4542.93	5549.29	4603.73	12656.7	5889.73	4261.57	4173.06	4752.39	5471.84	6276.36	14438.6	4102.04	8225.28	5840.76	4862.63	4690.09	7046.55	4930.85	5064.81	4544.94	5353.66	11714.6	5545.99	6703.66	7325.1	4974.57	3709.33	9646.39	7417.96	9725.58	8011.3	6623.24
1367	negative	NA	NA	Cepharadione A;Atherospermidine	0.435967219868841;0.461535234009323	MS1 mz matched	304.069	292.026	14406.7	19209.3	19224.6	21424.6	21131.6	19083.8	22156.9	25310.1	27811.7	23975.1	22489.7	19421.1	11410.4	38004.9	19352.4	19242.2	18348.2	26961.6	16725.3	18774.2	26719.1	17073.4	12125.6	30679.6	18349.7	17451	33308.4	34326	12982.4	19212.6	7437.64	20704.5	42470.7	10746.6	33567.6	23739.4	31452.9	30058.7	32700	22785.8	18433.3
65	negative	Succinate	0.9933	NA	NA	MS2 forward	117.021	379.501	32808.7	27713.3	24838.6	26235.2	24432.7	22032.5	20695.5	20921.8	22039.2	20191.2	19663.7	21064.4	31132.2	26787.1	10926.9	14082.3	18932.4	24262.5	12028.4	17561.7	13551.1	17627	18640	12870.2	42657.4	29793.6	18978.6	16710.3	25496	13671.1	64830.2	10921	25401.2	21133.4	15281.5	12870	14677.3	15502	15884.3	16932.9	38289.7
3401	negative	NA	NA	DG(18:2(9Z,12Z)/18:1(11Z)/0:0);DG(18:0/0:0/18:3n3);DG(20:3(8Z,11Z,14Z)/16:0/0:0);DG(20:2(11Z,14Z)/16:1(9Z)/0:0);DG(16:0/20:3(5Z,8Z,11Z)/0:0);DG(18:1(11Z)/18:2(9Z,12Z)/0:0);DG(18:1(9Z)/18:2(9Z,12Z)/0:0);DG(18:3(9Z,12Z,15Z)/18:0/0:0);DG(16:0/0:0/20:3n9);DG(16:0/20:3(8Z,11Z,14Z)/0:0);DG(18:3(6Z,9Z,12Z)/18:0/0:0);DG(14:1n5/0:0/22:2n6);DG(18:2(9Z,12Z)/18:1(9Z)/0:0);DG(16:1(9Z)/20:2(11Z,14Z)/0:0);DG(18…	-10.2266316675738;-10.2266316675738;-10.2266316675738;-10.2266316675738;-10.2266316675738;-10.2266316675738;-10.2266316675738;-10.2266316675738;-10.2266316675738;-10.2266316675738;-10.2266316675738;-10.2266316675738;-10.2266316675738;-10.2266316675738;-10	MS1 mz matched	599.495	35.071	6063.83	6258.7	9071.93	8529.29	6536.83	6150.29	6651.42	7965.59	6107.68	5416.25	7546.4	2464.39	4988.79	13126.7	4765.51	8472.66	11215.6	2452.64	7092.89	11482.2	3099.41	17406	9430.87	7513.15	6999.05	17841.4	8108.45	3147.51	3169.01	8723.59	5389.89	7429.26	5545.98	10240.9	10377.3	9039.08	6613.28	9979.85	6399.12	13560.1	4406.69
142	negative	Salicylic acid	0.8665	NA	NA	MS2 forward	137.025	44.8235	105675	102418	105583	149248	106828	137408	104145	106140	91426	141632	134020	6084.81	1149201	6007.86	6231.54	5181.92	5702.03	9102.23	7562.97	6902.8	7413.65	1899188	10151.8	5719.69	4960.65	4962.47	6203.34	6598.01	4658.1	8660.63	6698.91	7996.69	5754.74	8127.12	6481.71	4852.82	29981	8401.49	6721.57	10448.6	6020.85
2853	negative	NA	NA	Pumiloside	-17.8461	MS1 mz matched	511.17	29.397	12648.8	14623.1	19642.6	17654.8	18227.7	17131.5	16181.5	17602.8	14068.8	14764.3	10725.8	11992.8	1484.13	4413.88	83956.1	8076.03	26899.7	42643.7	5355.36	8446.41	17685.5	2614.57	8405.86	11302.6	12972.7	29183.5	27355.9	45142.8	41794.9	4127.89	12067.9	4554.29	15275.8	13655.3	4065.95	5882.54	55103.4	2047.94	30871.2	4389.32	23067.6
1573	negative	NA	NA	(9R,10S,12Z)-9,10-Dihydroxy-8-oxo-12-octadecenoic acid;Corchorifatty acid F;Auxin a;2,3-Dinor-8-iso prostaglandin F1alpha;2,3-Dinor-8-iso PGF1alpha	17.3953856364666;17.3953856364666;17.3953856364666;17.3164749789419	MS1 mz matched	327.231	39.0495	284417	256721	132363	277341	273894	259244	279339	294946	266070	261284	273194	338547	85371.3	303340	145354	280748	119494	247448	199247	292152	233934	411392	180164	73592	257186	100369	157229	275859	69655.7	213077	164132	185108	547877	265262	191727	182170	217428	279600	125875	347020	716018
5098	negative	NA	NA	NA	NA	Unmapped	1134.99	349.026	9372.53	7738.96	6090.73	7875.14	7549.44	6450	7726.24	6811.45	6225.31	5515.28	5532.56	6966.49	7832.4	9181.22	8205.08	5605.44	8739.29	7349.01	6363.38	10429.2	7267.93	11220.4	9608.09	6594.15	6711.45	7861.07	9540.39	9208.67	8320.64	7456.68	9020.02	7056.41	9760.13	7436.02	8079.12	7568.94	6099.87	6863.59	6449.23	5227.89	7781.41
4245	negative	NA	NA	NA	NA	Unmapped	801.568	142.775	261759	241889	231699	186061	165060	217197	168611	166850	196853	175628	179112	144737	146043	250706	214639	194927	242889	246233	301019	256815	148962	247870	150116	175943	209243	217226	160333	148140	199086	180837	179570	227872	172678	277413	395889	184006	163685	128420	184342	250158	157027
2239	negative	NA	NA	Rothindin;Betavulgarin xyloside;Formononetin 7-O-glucuronide;Dammarenediol-I;Arabidiol;(13R,14R,17E)-Malabarica-17,21-diene-3beta,14-diol;Dammarenediol II;(20S)-Dammar-24-ene-3beta,20-diol;Dammar-24-ene-3beta,20-diol;Lupan-3beta,20-diol;3beta,20-Dihydroxylupane;Monogynol A	-0.450056954722559;-0.450056954722559;-0.450056954722559;-19.5771030703716;-19.5771030703716;-19.5771030703716;-19.5771030703716	MS1 mz matched	425.36	102.954	62221.4	69747.5	87060.6	66089.5	85794.9	63312	83965.8	66999.8	54582.3	61277.4	55693.7	174138	32645.2	35189.4	114660	59560.9	111306	46943.2	116563	201852	53557.3	56719.6	34578.8	71639.6	140085	99644.2	27997.7	41784.2	88730	52802.9	31916.1	47780.3	67139.3	57737.6	47842.8	56599.6	103388	28994.2	61434.8	71537.2	94862.8
2517	negative	Cholesterol sulfate	0.9881	NA	NA	MS2 forward	465.301	27.343	443383	533465	408536	319365	382053	309679	376170	462992	400185	340997	350613	272236	481616	554304	376507	401575	355180	365388	260771	393907	312051	417160	403352	374649	383288	739338	526489	234302	195315	249790	402422	317125	589862	342928	125170	222966	209527	340366	279922	748954	465368
2029	negative	NA	NA	NA	NA	Unmapped	392.877	315.251	10627.3	14528.4	20950.2	19944.7	21041.9	18668.5	18869.8	18367.4	20594.6	18504	17951.7	17370.5	24282.2	13899.1	11516.8	17326.6	13754.5	30434.3	19868.5	12496.3	20649	15373.3	22607.3	28175.5	16680.2	13528.6	22317.9	17327.5	19787.9	19420.1	31916.7	16435.5	14947.3	19245.9	24434.1	15258.4	19302.8	19743.3	15266.6	9849.28	23253.5
3719	negative	PA(16:0/18:2(9Z,12Z))	0.9689	NA	NA	MS2 forward	671.46	40.996	9286.15	14090.6	14477	14501.5	14958.4	12737.1	12558.5	9157.99	11703.5	10129.1	13470.5	15043.2	8700.19	35499.8	8955.44	10887.9	23008.8	25422.8	18950	44190.3	9629.29	32230.1	31553.3	16220.5	15606.4	29951	41892.2	24362.6	6466.73	12089.1	25450.3	14391	41666.1	17408.4	22091.3	25512.7	19426	19841.2	20973.5	14904.9	23124.5
3980	negative	NA	NA	NA	NA	Unmapped	738.502	142.339	49263.8	46472.5	41005.3	40814.6	43091.1	37494.3	30865.2	35157.5	36907.3	29749.9	30345.7	20408.4	45279	45392.3	35961.7	18626	41795.3	26214.6	21098.5	40964.8	23921	57319.6	38668.3	30372.9	25983.7	35958.2	35391.9	35153.6	19075.4	26239.7	24936.1	39984.5	20916.3	60796.4	28328.7	53712.8	33907.6	25630.7	33898.6	20817.7	27555.6
3725	negative	NA	NA	NA	NA	Unmapped	673.021	349.071	12878.1	15926.3	16302.5	16167.1	21791	18047.2	22103.8	17280.8	20060.1	22631.9	21297.1	17964	16691.9	15711.1	18551.1	20686.8	18579.2	21241.7	22648.5	16328.6	23004.2	20594.4	18447.3	20966.2	17813	14282	19764.8	20407.6	22466.2	21726.8	22288.4	24230.8	16578.9	16792.2	17619.6	22351.5	21975.7	19502.3	20675.3	21293.9	19230.5
3309	negative	Bilirubin	0.9997	NA	NA	MS2 forward	583.251	53.194	33709.7	27861.2	32917.7	32612.2	44737.1	32041.6	41988.4	48841	36665	42504.6	41133.9	339205	13155.7	37226	35514	77403.9	21508.9	14537.1	38970.3	13879.9	64931.4	32432.3	16660.1	6748.15	44424.5	12538	16901	40212.2	35130.4	24006.7	18495.2	31151.8	25637.3	39924.4	9573.06	35702.3	195704	5737.58	15626.2	85620	30301.5
3122	negative	NA	NA	NA	NA	Unmapped	551.027	349.072	3276644	3121403	2565995	2790818	2601014	2482233	2460188	2238619	2107535	2035541	1908679	2529543	3123731	3145395	2560170	2276239	3220051	2265688	2024678	3629919	2224626	3117332	2964789	2345936	1950146	3493188	2517356	2757590	2496995	2545182	2856434	2465226	3336995	3094352	2689525	2345840	2335143	1958515	2565444	1893523	2305904
3976	negative	NA	NA	Norbadione A;	22.9916092416091;	MS1 mz matched	737.532	160.518	590925	949493	1012243	965259	731844	936825	932881	921817	591041	874138	844719	1011518	1072965	1186576	1138253	744787	1074296	801732	882523	629241	743125	1159451	954762	1049909	269693	611910	1029541	694588	796470	897593	852842	825466	968444	1331629	962105	1279524	976083	539322	988086	308034	1052705
2404	negative	NA	NA	Melleolide L;	-21.1729774456217;	MS1 mz matched	449.127	34.4545	15697.1	26432.4	25811	25766.4	21248.6	23791.9	24818	18314.3	18521.3	18938.5	19166.8	8883.8	4326.97	5903.13	26962	8623.86	60475.5	34464.1	7166.35	29433.3	10757.6	8938.33	7432.33	33970.5	7778.73	80546.9	29950.7	17821.9	19168.6	6461.59	32042.5	10452	14512.8	80223.6	13115.4	6325.83	168527	4576.22	31167.5	5157.97	21456.3
4504	negative	NA	NA	NA	NA	Unmapped	861.996	349.077	42630	53102.4	57012.6	70263.2	71470.5	78666.4	78479.4	69558.4	78858.3	72945.7	71048.2	77003.5	71315.4	49683.4	67088.8	80580.1	60978.8	83286.1	78321.2	46996.4	79647.7	68096.8	68549.5	76461.4	81495.6	48708.4	76117	78535.7	79263.6	76698.5	72402	77650.4	52084.1	69859.1	69089.9	72571.6	79519.4	65749.5	76575.5	71014.3	84009.4
4768	negative	NA	NA	NA	NA	Unmapped	964.513	349.651	8728.83	8952.18	8820.24	8774.89	7318.74	8419.76	7596.85	6045.02	5683.92	5480.97	7013.72	11125	9181.49	10683.3	8507.63	6511.56	6961.35	8351.47	7074.56	11197.2	5915.43	9243.44	8899.46	7267.19	6198.41	11009.2	9933.59	9683.08	8447.79	9265.26	12173.3	7395.03	11348.7	10249.3	10931.4	6339.24	7839.33	4724.29	9928.9	4714.3	7018.19
4958	negative	NA	NA	NA	NA	Unmapped	1053.65	178.016	13698.4	17196.3	19255.1	17590.7	15846.8	16042.1	14598.7	14978.9	10337.5	15420.3	11011.4	8443.11	82395	11182.6	11022.2	6159.55	19162.7	6320.3	19506.9	12414.2	13484.2	21421.9	23519.6	18114.9	32028.1	23623.9	10142	3476.17	6316.2	31458.9	32897.8	20028.6	13135.7	34265.2	9628.98	12195.6	42220	35945.2	8325.24	12036.8	26066
2119	negative	NA	NA	Cephaloglycin;Cefaloglycin;Cephaloglycin anhydrous	4.32066736724049;4.21205160713226	MS1 mz matched	404.101	392.736	67278.5	84673.4	68606.4	71868.7	59996.7	66016.3	61035.9	48857.2	56514.7	49393.2	50019.2	39121.9	10034.1	58120.3	47223.4	33236.1	10052.6	13108.3	10902.4	44842.5	29271.7	15234.7	14612.4	19329.6	38250.1	39628	29825.3	265768	450896	32297.9	7658.36	24674.9	34416.7	16167.4	90717.9	19891.5	5253.86	20487.6	276643	3663.3	10180.3
4078	negative	NA	NA	PE(20:3(5Z,8Z,11Z)/18:3(6Z,9Z,12Z));PE(20:3(8Z,11Z,14Z)/18:3(6Z,9Z,12Z));PE(22:5(7Z,10Z,13Z,16Z,19Z)/16:1(9Z));PE(22:6(4Z,7Z,10Z,13Z,16Z,19Z)/16:0);PE(20:5(5Z,8Z,11Z,14Z,17Z)/18:1(11Z));PE(16:1(9Z)/22:5(4Z,7Z,10Z,13Z,16Z));PE(20:5(5Z,8Z,11Z,14Z,17Z)/18:1(9Z));PE(18:1(11Z)/20:5(5Z,8Z,11Z,14Z,17Z));PE(20:4(5Z,8Z,11Z,14Z)/18:2(9Z,12Z));PE(18:1(9Z)/20:5(5Z,8Z,11Z,14Z,17Z));PE(18:3(6Z,9Z,12Z)/20:3(5Z,…	-17.229388380847;-17.229388380847;-17.229388380847;-17.229388380847;-17.229388380847;-17.229388380847;-17.229388380847;-17.229388380847;-17.229388380847;-17.229388380847;-17.229388380847;-17.229388380847;-17.229388380847;-17.229388380847;-17.229388380847;	MS1 mz matched	762.502	141.471	70113.4	74375.3	85656.6	81860.2	71876.2	72639.9	58939.3	69785.4	41862.1	62512.2	59220.2	25882.8	36546.9	92981.2	55176.1	34465.3	53687.3	31202	40571.8	57623.9	47819.3	104600	68833.9	41959	57815.4	63398.4	70549.7	88237.6	30117.4	63134.6	25531	58230.2	32975.8	82474.2	35560.5	81410.8	45304.7	23585.4	89756.3	68976.1	76978.2
2054	negative	NA	NA	NA	NA	Unmapped	396.003	290.754	8951.99	9614.98	7952.93	8153.46	6376.44	8116.51	8001.17	7022.22	4816.01	7809.75	6280.12	4020.52	9202.99	13828.5	5462.46	5763.36	5904.62	7566.44	2953.28	3647.07	3607.77	4518.14	6300.22	3746	6548.49	6325.7	5756.35	5926.77	6447.16	5493.56	8182.27	4484.35	9012.64	8535.18	6144.1	5305.62	5231.01	3493.64	3592.22	4411.43	4823.23
206	negative	L-Homocysteine	0.8625	NA	NA	MS2 reverse	156.013	177.242	10433.7	7994.75	9316.41	10739	9249.61	8860.61	8314.37	9421.66	9013.12	6115.38	5835.99	955.344	1279.55	1576.95	452.748	857.593	1062.02	745.537	565.069	935.191	944.02	520.955	1023.94	885.543	1084.11	1254.88	1235.79	1094.94	1288.99	1256.21	1674.59	1162.65	809.137	1306.48	1418.8	822.409	1233.37	1063.39	509886	506.245	721.436
4097	negative	NA	NA	Saquivir mesylate;Saquivir mesilate	-1.82679	MS1 mz matched	765.365	29.823	5753.03	5658.39	5376.44	6177.8	6380.54	6817.31	5318.46	3329.64	7339.85	5480.58	6349.2	2310.9	0	590.786	83826.4	8285.42	9933.54	3792.02	566.687	2368.58	1442.86	478.435	356.257	2394.86	2985.64	2909.72	7942.58	8193.08	11382.3	375.303	4451.69	1601.32	5676.52	4547.13	2624.43	609.146	8580.35	755.885	7297.92	373.891	4466.55
4183	negative	NA	NA	NA	NA	Unmapped	788.752	315.602	2774.7	2872.27	3119.35	2737.06	2660.8	2462.84	2517.4	1816.29	2072.37	2123.39	1799.95	2293.94	4407.73	3157.85	1568.22	1914.86	1652.17	3814.68	1607.6	2087.79	1429.87	2022.38	3050.52	3298.89	1934.39	3000.72	3081.48	2293.75	2116.25	2371.66	4586.04	1444.11	3049.33	3029.76	1822.91	2100.88	2196.99	2017.29	2066.43	1221.93	2845.92
3374	negative	NA	NA	Pipercyclobutanamide B;Dipiperamide D;Berbamunine;(1S)-1,2,3,4-Tetrahydro-1-[[4-[2-hydroxy-5-[[(1R)-1,2,3,4-tetrahydro-7-hydroxy-6-methoxy-2-methyl-1-isoquinolinyl]methyl]phenoxy]phenyl]methyl]-6-methoxy-2-methyl-7-isoquinolinol;Guattegaumerine;N,N'-Dimethyllindoldhamine;Magnoline	-8.60522854479741;-8.60522854479741;-8.5431785884058;-8.5431785884058;-8.5431785884058	MS1 mz matched	595.284	238.778	10742.9	11537.9	17517.8	14899.6	13661	16115.6	12007.5	13864.5	9518.25	15795.9	13900.8	8941.71	9787.31	9955.84	23829.9	18151.3	10493.3	10443.8	13820.7	8975.42	12256.5	14475.3	9283.59	9770.78	15887.7	16810.3	17304.3	13159.3	10059.5	5620.33	10474.8	7449.7	10199.5	16782.7	17045	19700.2	7895.46	11353.5	8976.04	13600.1	14019.2
2456	negative	NA	NA	NA	NA	Unmapped	455.009	349.027	90245.4	91979.8	70754.2	77455.8	69433.7	70880.6	65445.1	59340.6	60199.3	53699.6	57852.5	64740	80237.4	89184.4	67834.5	62288.9	87954.3	63647.5	57858.4	97809.2	56527.8	83990	79365.1	63928.3	57726.4	98432.3	71620.9	79144.9	76167.7	70705.5	75495.8	74065.8	98499.1	89993.4	81111.4	69061.9	66420.4	50519.1	74491.5	56141.1	56675.6
2087	negative	N-Acetyllactosamine	0.7819	NA	NA	MS2 reverse	399.163	107.411	68835.2	86384.3	86122	80256.9	67770.2	79474.9	62532.9	65817.7	62726.3	51055.1	50775.1	262510	8611.97	8700.03	166501	76819.4	19056.8	6348.47	12290.7	32952	137440	35261.6	6792.32	96497.4	24253.8	58907	102605	156074	23563.3	5935.12	11989	7250.43	8788.97	62850.3	155003	11689.5	11275.5	9854.21	273578	42116.2	12404.5
2532	negative	NA	NA	NA	NA	Unmapped	467.531	349.074	24937.7	27770.5	21191.4	23949.5	16043.9	16350	21434.8	16299.5	20016.9	19254.4	19882.2	25348.9	25203.5	28892.4	24526.2	21738.8	27292.5	19852.9	12396.6	27162.5	23136.5	22826.5	27240.5	24527.5	19721.9	29040.5	17539.4	25723.1	21822.8	15127.9	28013	22556.8	27550.8	24177.2	28789.3	27113.9	24428.3	14085.1	26817.1	17010.8	15387.8
2799	negative	NA	NA	Sodium glycocholate;3a,7b,12a-Trihydroxyoxocholanyl-Glycine;Glycocholic acid;Glycocholate;Glycocholic acid;3alpha,7alpha,12alpha-Trihydroxy-5beta-cholan-24-oylglycine	-17.2747557899232;-17.2747557899232;-17.2747557899232;-17.1928761318569	MS1 mz matched	505.331	27.406	26615.3	32743.8	28002.6	20899	22353.4	21961.4	25831.8	35079	23676.8	32491.7	23397.5	14178.2	12855.2	26507	12864.4	41831.4	24150.1	27432.1	15531	15141.9	30302.7	44823.8	32939	22131.6	32422.2	30703.5	36804	7207.83	7478.35	22982.2	33762.3	18612.8	31983.5	24187.7	20512	49616.4	15580.8	31137.6	14214.8	50076.5	16932.2
2854	negative	NA	NA	Physalin M;Raucaffricine;Vomilenine beta-D-glucoside	18.4049487256414;-3.59282091794928	MS1 mz matched	511.214	190.415	13452.8	14913.5	16941.2	15889.5	16707.7	14953.9	15265.9	8976.2	19266.2	19339.9	17482	17774.1	17788.1	15176.8	21322.5	10513.4	14252.5	12570.5	11130.4	9419.76	31219.6	5600.98	11182.5	28738.4	18333	28158	15224.7	12286.2	19516.7	11614.6	16073.4	7412.1	3126.42	9022.04	34009.4	16450.4	3765.34	6759.34	6430.11	10723.8	23830.8
598	negative	Pantothenate	0.9865	NA	NA	MS2 forward	218.103	269.438	6228.41	7682.25	7981.2	8624.86	5986.65	5747.79	7364.28	8482.38	4927.98	8502	8646.01	5706.63	12206.6	4186.4	10082.7	6484.35	2039.42	12203.8	3533.48	4755.03	5393.69	4032.91	3589.78	6118.99	8769.38	7615.89	7908.53	12158.6	12967.3	3072.7	16277.5	5340.08	8309.35	3976.91	9397.05	5696.77	3402.49	5018.65	8176.68	5238.31	16346.5
3346	negative	NA	NA	iso-A2E(9,13-di-cis);iso-A2E(11-cis);iso-A2E(13-cis);N-Retinylidene-N-retinylethanolamine;iso-A2E(9-cis);	10.1204850590995;10.1204850590995;10.1204850590995;10.1204850590995;10.1204850590995;	MS1 mz matched	591.458	105.6	79698.6	93533.1	120002	104309	84332	116832	82876.2	73884.4	94885.8	84327.6	67603.9	110189	55924.9	46707.2	155918	78718.7	138698	42497.8	174028	69051	89693.4	103427	143584	40791.6	59036.5	67936.9	94087.7	14856.8	103379	94755.5	26633.7	40490.8	32255.3	160266	74305.8	126354	538463	95732.8	33093.6	98298.8	128389
3446	negative	NA	NA	Quercetin 7-(rhamnosylglucoside);Meloside L;Multinoside A;Kaempferol 7-sophoroside;Isorhamnetin 3-O-[b-D-xylopyranosyl-(1-&gt;6)-b-D-glucopyranoside];Panasenoside;Quercetin 8-C-(2''-rhamnosylglucoside);Luteolin 6-C-glucoside 8-C-arabinoside;Paeonoside;Rheinoside A;Quercetin 7-rutinoside;Quercetin 3-(2-glucosylrhamnoside);Allivicin;Isoquercitrin 4''-rhamnoside;Calendoflavobioside;Quercetin 3-galac…	-21.9613688388874;-21.9613688388874;-21.9613688388874;-21.9613688388874;-21.9613688388874;-21.9613688388874;-21.9613688388874;-21.9613688388874;-21.9613688388874;-21.9613688388874;-21.9613688388874;-21.9613688388874;-21.9613688388874;-21.9613688388874;-21	MS1 mz matched	609.504	38.364	6253.4	6232.9	7698.13	7877.12	10249.7	9671.23	8996.15	7135.84	9122.01	8807.04	5966.45	9912.22	4042.01	5745.24	7376.49	12205	11413.9	5865.14	10866.1	11531.5	6947.73	9750.66	10405.1	4599.95	6385.96	5540.91	5284.39	3635.78	3751.03	8856.9	5932.26	5366.63	7186.32	11302.3	8957.18	6914.94	12051.4	9004.88	2181.11	11945	10526
3561	negative	NA	NA	Madlongiside C;	-20.9031496961955;	MS1 mz matched	635.374	188.505	13511.4	14168.8	17703.8	10056.3	17863.5	17091.4	17511.4	15176.3	12509	11578.3	13057.6	17862.8	3568.97	7544.44	19155	5653.38	12224.4	14553.9	6224.49	9510.56	6925.55	8171.94	4920.77	4720.15	52414.5	14427.6	8459.32	8901.83	12001.7	10864	8124.77	22255.4	5485.7	8108.17	9469.42	11723.1	8172.24	4883.43	3988.83	36273.7	11419.8
4507	negative	NA	NA	Mycobactin S	18.8519	MS1 mz matched	862.498	349.109	18519	20506.5	33555.7	31120.1	32032.7	36069.1	35628.1	33244.5	31319	31966.1	31534.3	34549.4	31740.9	25897.5	33006.7	33553.3	32239.5	39084.5	37487.5	25335.6	33433.4	27612.7	26719.4	32019.5	35333.4	24747.7	31146.6	35345.2	35725	37570.4	31445	35006.4	26105.1	25510.1	32803.4	37125	38327.4	30364.8	35491.1	30679.1	35408.7
3547	negative	NA	NA	NA	NA	Unmapped	630.868	44.149	14013.1	9623.86	7968.31	10896.8	10558.5	10349.6	7158.73	9817.26	8748.61	8609.69	9117.85	10441.2	1093.79	2183.5	35786.9	10907.2	8157.9	17394.6	1051.16	7559.5	5677.74	3134.79	1086.53	12862	13583.6	4679.45	11212.8	16179.2	7719.18	1336.17	15577.3	1225.32	8190.76	1634.36	3333.14	1961.02	4363.32	1509.9	5854.95	4776.08	18274.2
4501	negative	NA	NA	NA	NA	Unmapped	861.317	33.7835	3915.27	5501.57	5660.51	5807.76	6334.17	6156.27	6417.25	4840.25	4730.32	3329.4	5724.18	0	0	0	14669.5	1333.96	2165.18	18533.3	138.523	1001.84	7314.8	153.65	392.768	6385.79	2410	2773.36	8694.73	16384.4	3720.75	0	3845.8	0	4768.45	210.958	687.63	0	1517.43	0	15625.9	217.104	8125.23
1860	negative	NA	NA	4R,5R,6S-Trihydroxy-2-hydroxymethyl-2-cyclohexen-1-one 6-(2-hydroxy-6-methylbenzoate);Mecarbinzid	7.78052870798791;-7.46524684160365	MS1 mz matched	367.103	301.466	696628	763206	768923	811024	791011	915130	947426	1081303	1161033	1197599	1047852	1146390	570826	736957	1036810	1271250	848768	1013806	1071581	729367	1097858	768296	665458	1305618	1049732	819676	1107718	988246	758972	908793	410663	593667	901405	531605	1139237	1019214	1099320	1363534	1213061	1105744	1073109
3404	negative	NA	NA	Taurochenodeoxycholate-7-sulfate;Taurochenodeoxycholate-3-sulfate;	-7.89533325307337;-7.89533325307337;	MS1 mz matched	600.222	191.091	10408.7	14430.5	11680.9	11815.3	9254	8225.01	10448.9	8673.57	9028.48	8896.48	8333.99	31327.3	1044.34	3648	4392.42	2542.7	3207.05	2339.85	2635.07	2058.76	1993.71	6314.79	1377.44	2011.38	33754.4	1881.07	2517.87	3030.62	3171.1	1865.96	2495.62	1529.39	3883.43	2400.03	4604.56	2980.62	596.034	1693.42	1602.55	43472.3	3545.59
385	negative	Kynurenic acid	0.9999	NA	NA	MS2 reverse	188.035	188.887	5948.19	9376.17	7447.81	10669.5	10044.6	7876.34	8607.02	10420.4	11846.7	8261.99	8071.11	4049.68	40920.6	1620.38	6571.66	3114.54	2933.2	2763.29	1884.54	1400.2	3856.38	2106.97	1812.81	1986.93	7206.52	3951.35	3971.46	3774.79	8341.49	1989.9	3224.75	2044.29	2575.46	6075.51	3102.18	3126.22	3105.15	1619.36	3281.68	2807.82	5243.61
3797	negative	NA	NA	PC(14:0/15:0);PE(14:0/18:0);PC(15:0/14:0);PE(16:0/16:0);3-Sn-phosphatidylethanolamine;PE(18:0/14:0);	-20.6939773681821;-20.6939773681821;-20.6939773681821;-20.6939773681821;-20.6939773681821;-20.6939773681821;	MS1 mz matched	690.501	146.661	4655.76	4233.46	3586.67	5001.12	3401.84	4009.71	3439.61	6213.28	4655.22	3972.7	4223.44	3286.02	6861.38	3277.14	4157.97	2585.09	5765.8	6663.88	4734.79	3695.87	2491.71	5363.15	2884.03	5083.84	3513.18	10864.9	4251.48	5805.21	4204.08	2991.52	3114.62	6377.58	6210.93	3723.23	4023.75	6704.19	6555.06	2082.62	6639.31	4240.71	6292.49
4865	negative	NA	NA	TG(24:0/20:1(11Z)/20:2n6);TG(20:0/24:1(15Z)/18:2(9Z,12Z));TG(24:0/18:2(9Z,12Z)/20:1(11Z));TG(20:0/18:2(9Z,12Z)/24:1(15Z));TG(22:1(13Z)/22:0/20:2n6);TG(20:0/20:2n6/24:1(15Z));TG(22:0/22:1(13Z)/20:2n6);TG(22:1(13Z)/22:0/18:2(9Z,12Z));TG(24:1(15Z)/20:0/20:2n6);TG(22:0/18:2(9Z,12Z)/22:1(13Z));TG(20:0/24:1(15Z)/20:2n6);TG(20:1(11Z)/24:0/20:2n6);TG(24:0/20:1(11Z)/18:2(9Z,12Z));TG(24:0/20:2n6/20:1(11Z))…	-0.823389968602688;-0.823389968602688;-0.823389968602688;-0.823389968602688;-0.823389968602688;-0.823389968602688;-0.823389968602688;-0.823389968602688;-0.823389968602688;-0.823389968602688;-0.823389968602688;-0.823389968602688;-0.823389968602688;-0.82338	MS1 mz matched	1010.67	39.7165	6801.2	7458.83	7658.62	9426.12	9407.92	6263.4	6912.49	6844.51	7166.13	6102.15	4756.3	7395.96	281.703	557.386	12653.8	5410.05	2471.22	1628.23	633.221	2453.36	11464.6	493.502	180.929	15553.2	10906.8	1820.12	6094.01	13739.1	1120.82	2614.26	10805.2	860.283	993.147	16777	4937.57	8430.68	1100.32	501.042	5001.58	18497.8	2498.09
4361	negative	NA	NA	Digitoxigenin 3-[glucosyl-(1-&gt;6)-glucosyl-(1-&gt;4)-2,6-dideoxyribohexoside];	-20.8134974817458;	MS1 mz matched	827.397	367.776	1943.19	1273.81	1252.16	1469.12	1092.85	1120.03	1563.1	1432.15	1330.3	1135.41	1116.59	43.8329	105.807	189.614	272.189	76.8435	408.82	1651.57	276.108	14.6052	167.506	0	37.248	482.953	769.2	24.2876	184.841	44.1095	479.688	1807.76	89.1914	10.654	263.334	186.668	0	47.8052	528.9	0	63.6185	51.0828	29.5011
2101	negative	Cellobiose	0.8253	NA	NA	MS2 forward	401.127	393.55	10553.4	7831.63	7926.93	7642.64	6607.31	8414.83	7313.69	5794.09	6461.45	6100.73	5867.43	4775.39	7851.62	3609.96	2422.56	4235.62	3024.56	2731.86	1872.37	7047.24	2171.48	1054.56	1047.93	3494.5	4790.88	6571.04	3891.88	31988.2	93132.9	2638.37	1342.1	1693.12	4383.27	1169.68	6778.85	1620.99	1184.84	1583.71	59006.1	1512.22	2131.2
2274	negative	NA	NA	Phenethyl rutinoside;Athamantin	17.4941462221488;-18.0779043754578	MS1 mz matched	429.191	35.189	205394	312150	221020	198150	193747	267561	200863	194610	182244	179072	188682	456534	4323.95	36299.1	664083	405837	300851	51115.1	42123.9	132157	87202.3	44142.7	29260.8	67353.5	1015983	15626.8	123097	671309	61813.7	17193.7	76744.6	57407.5	129294	31922.7	44780.3	41009.9	12816.1	20615.7	320085	255463	406364
4157	negative	NA	NA	NA	NA	Unmapped	781.358	33.7605	5107.9	5276.53	7743.23	7778.07	6177.09	5200.45	6592.14	4914.93	7772.38	5683.36	5019.56	1087.72	389.686	570.81	42257	2402.66	8026.16	7993.68	804.391	1517.06	5318.08	644.799	663.758	8774.15	2866.85	2689.46	6742.65	24009.1	3423.19	633.387	2501.62	433.127	7656.94	2653.26	1258.19	810.307	6219.43	438.906	15179.2	1214.6	8263.66
4192	negative	NA	NA	NA	NA	Unmapped	791.578	171.213	19332.9	23222.3	24108.4	21754	30554.7	27829.9	22681.3	24749.1	35541.8	19631.8	26795.7	15543.7	21332.7	19116.8	18854.5	19396.9	24464.2	18605.6	20028.3	36843.4	14903.6	24666.6	26039.5	19598.3	15913	23445.6	22474.5	26015	12461.3	21260.4	26400	17591.2	31298.5	27649.8	17333.2	29492.6	25502.7	27282.9	22950.3	21741.1	34910.9
3330	negative	NA	NA	NA	NA	Unmapped	588.828	314.863	11530.1	11322.9	13454.5	13302	12969.9	10330.1	10225.3	8583.03	10326.5	8111.58	7469.93	8815.99	20166.2	12638.7	6175.25	8506.89	9329.65	17828.7	8474.1	8978.24	9828.54	9811.81	16510.1	16085	7682.75	10787.6	12774.1	10417.8	10472.4	9653.05	24500	9151.75	13071.1	14159.4	17969.5	8181.72	10204.8	8236.28	8857.02	4295.49	13551
3877	negative	NA	NA	Scleroglucan;	17.2138309072542;	MS1 mz matched	713.554	173.152	33653.4	47932.6	41874.8	31333.8	37503.2	29452.3	29931.8	32476.3	27921.2	27190.7	28771.4	35283.7	25313	30582.6	31859.9	43095.1	41195	29556.5	36701	42900.8	29036.3	93083.5	36346.9	30145.8	36663.6	32587.9	44601.1	40387	51533.5	42380.6	39575.7	50038.1	50615.4	59515.8	28839	38525.2	40199.1	67864.1	27187.8	29860.4	32264.5
4003	negative	NA	NA	PE(16:0/20:2(11Z,14Z));PE(18:0/18:2(9Z,12Z));PE(18:2(9Z,12Z)/18:0);PE(18:1(9Z)/18:1(9Z));PE(18:1(9Z)/18:1(11Z));PE(16:1(9Z)/20:1(11Z));PE(18:1(11Z)/18:1(11Z));PE(22:1(13Z)/14:1(9Z));PE(20:2(11Z,14Z)/16:0);PE(18:1(11Z)/18:1(9Z));PC(18:2(9Z,12Z)/15:0);PE(14:1(9Z)/22:1(13Z));PE(14:0/22:2(13Z,16Z));PE(22:2(13Z,16Z)/14:0);PC(15:0/18:2(9Z,12Z));PE(20:1(11Z)/16:1(9Z));	-17.2349677039313;-17.2349677039313;-17.2349677039313;-17.2349677039313;-17.2349677039313;-17.2349677039313;-17.2349677039313;-17.2349677039313;-17.2349677039313;-17.2349677039313;-17.2349677039313;-17.2349677039313;-17.2349677039313;-17.2349677039313;-17	MS1 mz matched	742.534	40.3045	116824	157489	105151	121436	118104	103691	99219.8	96612.2	102250	83929	80562.8	96778.9	83943.1	159218	85015.9	161422	212725	79605.6	71057.4	111003	74688.4	106235	129402	118560	109874	130293	120055	77789.9	52851.6	103206	92862.6	85892.4	108806	124751	151512	148475	101420	81624.5	72187.3	104762	75725.7
2350	negative	NA	NA	dehydrofelodipine;Sarcostin	-5.23234215334307;1.30809409379342	MS1 mz matched	441.249	28.5435	10984.6	8245.42	11232.1	9145.48	11470.9	9094.45	8704.81	9304.73	12812.1	10514.4	15235.3	8353.22	36816.7	15810.9	7879.29	51817.9	11790.2	47469.4	31794.7	14932.7	50302.1	59675.4	15404.9	28446.8	15907.1	15057.2	21546.3	8595.9	6503.04	45223.1	21496	24803.5	10041.9	12219.8	12921.8	19151.3	15201.4	12024.3	20137.3	9670.28	15470
4460	negative	NA	NA	alpha-Chaconine;Chivosazole B	-22.994396452588;1.79240430221372	MS1 mz matched	850.484	147.937	6562.91	8200.5	9229.35	12816.6	12409.2	10179.7	12366.7	11997.8	9094.28	9318.19	10912.1	11983.4	11599.9	9059.68	11358.7	10645.8	11035	9401	12685.9	8226.72	11701.7	10188.3	12614.7	12610.7	10303.2	8949.15	16056.9	8872.09	11291.4	11523.3	11591.9	9294.7	8862.45	10417.5	13731.9	12998.9	10743.6	9399.35	13377.6	11296.1	10650.9
2068	negative	NA	NA	N-Feruloylglycyl-L-phenylalanine;S-Adenosyl-L-methionine;S-Adenosylmethionine;AdoMet;SAM	-1.62552705817637;24.9642585521256	MS1 mz matched	397.147	206.681	37706.7	43717.8	42427.2	46975.3	45798.6	28957.3	43894	30179.7	47080.2	45103.9	26257.7	53023.1	7671.88	7777.56	88806	49292.7	16444.7	8276.63	10163	17241.2	80077	6699.32	6362.72	38693.3	66532.2	25522.5	22582.8	34321	18685.5	8941.12	42947.1	9566.61	7185.17	97139.7	41914.4	45402.7	9794.76	9070.53	59365.4	102837	14623.7
3419	negative	NA	NA	Ginsenoside Rh3;Hebevinoside IV;	-21.9795608023132;-21.9795608023132;	MS1 mz matched	603.844	46.915	11037.6	11649.5	7606.79	7626.92	8757.65	8403.54	9968.72	7011.94	11054.7	6742.65	8122.52	5226.54	236.612	1288.15	15809.8	6372.22	17050.6	11506.6	2071.14	13074.5	6163.81	5259.83	1073.38	9409.49	3447.94	15138.8	6075.45	11337.7	9977.65	1173.66	7657.94	1346.94	5118.94	16478.1	2538.89	1467.42	46680.1	2378.99	13696.9	2952.87	8595.93
4814	negative	NA	NA	TG(20:1(11Z)/24:0/o-18:0);TG(22:0/22:1(13Z)/o-18:0);TG(24:1(15Z)/20:0/o-18:0);TG(22:1(13Z)/22:0/o-18:0);TG(24:0/o-18:0/20:1(11Z));TG(22:0/o-18:0/22:1(13Z));TG(24:0/20:1(11Z)/o-18:0);TG(20:0/o-18:0/24:1(15Z));TG(20:0/24:1(15Z)/o-18:0);	-15.5734641810224;-15.5734641810224;-15.5734641810224;-15.5734641810224;-15.5734641810224;-15.5734641810224;-15.5734641810224;-15.5734641810224;-15.5734641810224;	MS1 mz matched	986.678	39.7105	10288.5	9264.69	7721.44	11000.9	11783.5	11201.9	10375.1	9824.68	5718.05	9693.2	7252.26	6600.44	462.322	77.3082	20322.1	8308.93	2917.42	0	0	4542.39	25118.3	0	431.842	13004.8	17100.8	2199.42	6807.52	25668.6	85.2357	3062.33	24579.5	1257.5	0	10413.6	7946.3	18914.6	240.694	94.8662	7917.76	25147.7	617.376
500	negative	Indolelactic acid	0.9672	NA	NA	MS2 forward	204.066	164.577	21527.6	14422.4	13566	17297	19120.4	12622	20618.2	13899.3	12282.9	17858.7	16691.5	11618.2	20417	13230.6	22989.3	14261.5	26288	10203.9	13028.6	10251	7514.48	14898.5	25106.4	6778.89	10990.2	16441.1	19483.9	6966.22	11761.7	19085.2	13890.7	24750.9	13686.4	15083.3	11355.7	17138.7	25761.8	23050.3	7419.97	10096.9	28459.6
765	negative	NA	NA	NA	NA	Unmapped	240.043	172.61	727464	609359	564430	502675	517459	450476	441655	414726	442053	427884	412482	433300	996988	551407	817284	551224	648018	744736	552891	416278	622022	701323	782688	411493	549958	565276	439401	487044	615905	570530	901797	563038	482943	976743	466165	448369	596376	519655	432511	754041	574302
1706	negative	NA	NA	NA	NA	Unmapped	345.013	349.632	229351	276357	315265	337973	365088	349228	388096	364086	410613	483969	429193	355696	333974	252526	346555	452449	323961	426712	462654	261988	456659	343575	342575	360641	398199	237203	360848	374327	401335	390617	395629	387557	265110	347390	335341	417666	421364	440187	394341	444512	412518
1270	negative	NA	NA	NA	NA	Unmapped	294.901	315.18	13184.8	18254.8	25303.1	24508.1	29827	26330.7	27335.7	27541.7	28812.4	27331.5	26556	21473.1	27191.2	17104.4	17998.3	26576.9	17463.5	40297.1	29244.5	13677.1	29883.4	21186.1	29026.7	36236.1	25744.3	14870.7	27276.8	25696.2	27274.9	26973	39341	26066.2	19085.1	23543	30461.8	23421.5	27744.8	30449.2	21811.7	17768.7	31680.1
2742	negative	NA	NA	C.I. Food Red 1;	-20.3933175772267;	MS1 mz matched	495.036	235.511	18767	14315	12312.8	11899.5	10279.2	11696.6	11257.3	10440.3	11356.2	10911.9	11054.6	11093.8	14357.6	17306.2	12898.4	6054.86	13288.9	10872.7	12234.3	16131.1	13056.5	13858.9	11242.9	12882.3	9704.26	17342.7	11597.2	11592.3	11127.2	10934	11939.5	11435.4	13736	13996.2	14500.4	11038.8	13851.7	10009.4	12602.8	7423.2	11926.4
2552	negative	NA	NA	Lucidenic acid K;	-19.0161441957113;	MS1 mz matched	471.237	190.274	9749.37	10512.9	7765.79	12702.7	8940.3	10290.1	11768.9	8180.31	6482.16	9071.31	7580.14	31267.2	3894.05	15862	5495.26	7252.6	37744.5	1883.08	15633.9	7410.99	1832.08	12158.4	36265.2	3148.4	10354.5	5114.95	2749.27	2481.43	3077.64	11031.3	5684.31	1879.47	3894.05	8208.05	2263.38	7705.21	22791	7957.44	2392.38	28043.8	6028.13
3606	negative	NA	NA	NA	NA	Unmapped	643.452	48.791	15556.7	13397.4	11454.3	13628.5	10730.2	10212.5	18506.1	14381.9	10585.6	16961.3	13640.2	22151.5	6277.03	11606.9	30613.4	75663.4	18103.7	12622	5736.13	7965.8	14080.6	7922.42	5929.71	8172.48	15888.5	6093.13	6930.45	9008.19	19071.1	7263.08	24913.5	4817.82	12978.7	15153.3	5817.14	9655.67	10389.9	19136.6	3000.67	18386.2	31822.3
611	negative	NA	NA	NA	NA	Unmapped	221.012	225.255	88284.6	64498.4	92490.6	88414.8	65056.6	65234.9	66697.8	56790.7	63913	69824.4	48249.5	72248.6	112492	55303.6	67558.2	48797.4	66712.8	90451.9	47027.6	47761.1	34975.6	53225.8	71044.2	34165.7	81243.1	68805.6	33015.1	54087.3	65524.7	58452.9	93944.3	54803.8	55237.2	55638.9	74369.8	48115.7	44454.3	46407.9	57209.8	55433.5	85832.6
1295	negative	NA	NA	NA	NA	Unmapped	296.133	296.215	75047.4	59926.7	63461.8	61030.1	53694.6	48640.8	48833.5	46143.5	42871.8	41220	43264	76066.4	35761.1	78144.5	36597.8	25323	55587.1	37358.6	40344.7	54304.4	36866.9	47266.8	28552.5	48079.7	21877	81024.3	71451.9	45477.7	20555.6	32482.8	10576.8	62839.9	71523.2	29097.4	120375	58409.6	86643.8	128820	49352.5	29741.6	30114
2306	negative	NA	NA	Simulansamide;Aureothin	-11.4250812257984;-11.3306601367244	MS1 mz matched	434.106	67.064	19131	15904.2	16263.9	13900.8	13900.5	11471.5	11160	12601.9	10331.5	12184.8	11232.3	9798.05	33115.2	13753.6	21643.2	8826.11	11311.2	23995.2	16575.8	24841.6	11195.4	23090	28577.7	19546.5	50635.3	40942.1	48533.1	24776.2	31947.2	19116.6	52257.6	22285.7	17605.4	13060.8	81306.2	19448.6	7400.49	42831	34233.2	10528.2	23573.4
1429	negative	NA	NA	NA	NA	Unmapped	310.932	315.026	26001.4	27519.8	31002.8	26445.1	26363.7	21765.6	20640.1	20604.6	21113.6	17354.5	15867	21187.7	43987.9	29145.6	14483.8	18467.8	21136.8	34793.9	18299.2	24623.5	19903.6	22350.8	35635.6	33126.2	17743.1	26949.1	27166.1	21672.7	22175.4	21977.2	49046.5	18846.8	28288.9	30303.8	40627.1	16747.2	22124.6	19361.3	18569	10091.6	27340.1
1686	negative	Isomaltose	0.7668	NA	NA	MS2 forward	341.106	393.405	16939.4	15612.2	11463	11178.3	14975.9	12905.6	12000.6	9618.97	10469.4	13898.4	9192.57	8351.57	11941.1	11162	3043.07	6563.57	10862	4312.6	2492.66	9515.28	7537.4	2131.18	2318.6	6187.32	8806.51	13447.1	5564.86	52688.3	182417	3204.25	2572.21	5710.55	6198.22	4023.02	12371.4	3686.7	1805.21	4178.13	48594.8	2548.12	2817.67
4154	negative	NA	NA	NA	NA	Unmapped	780.496	349.095	20710.5	22070.8	33642.3	36414	34431.8	36420.8	41044.1	37352	38859	38663.4	41643.1	37239.7	31883	25047.2	31701.2	43608.3	27379.9	44330.4	43355	26305.3	38221.2	32033.7	31618.8	40582.8	42689.9	24797.4	35137.8	38600.6	40661.6	39855	37967.2	34459.8	25761.9	31987.4	35242.4	40136.5	40959.7	37188.3	37123.1	39322.4	41836.7
34	negative	NA	NA	NA	NA	Unmapped	103.042	230.15	72416.8	76636.5	79672.4	89398.7	76494.1	109574	77678.7	81956.4	77733.2	78934.4	129340	256712	4132.26	41220.7	160191	267322	20359.6	6404.91	51296.6	7802.35	119978	96432.2	7278.91	72518.3	115051	8891.17	14912.8	12680	201451	14349.3	171672	15314.7	27596.5	22346.6	25994	38688	5679.35	22260.3	5260.05	135227	144298
337	negative	Hydroxyphenyllactic acid	0.9916	NA	NA	MS2 forward	181.051	191.286	13027.6	14542.7	16625.3	16604.7	19270.2	14750.9	16848.1	16035.4	24704.5	22310.3	15443.3	15438.1	26522.8	13010.8	16913.5	22208.1	15732.2	14323.8	11956.8	8138.57	15567.6	9606.84	14726.8	10509.3	13317.6	10576.3	9411.41	10794.6	17302.5	13811.2	10825.1	20473	11079.4	21552.6	9885.23	16158.8	21750.8	18938.4	14425.8	6336.69	21393.1
3555	negative	NA	NA	N-desethylamiodarone;	12.3494231709277;	MS1 mz matched	633.029	349.072	2537204	2416927	2074979	2110996	1967171	1846783	1789093	1572255	1556006	1443222	1395919	1904326	2359924	2376201	1895706	1624543	2506248	1652072	1445035	2890035	1613297	2362932	2287022	1852743	1534561	2705669	2075331	2040785	1856080	1849416	2136563	1786612	2623504	2356857	2206125	1710467	1710815	1381368	1977633	1339299	1725450
1974	negative	NA	NA	Porson;Gingerenone B;Isogingerenone B;Burseran;(+)-Burseran;(+)-Eudesmin;Pinoresinol dimethyl ether	0.158996122864972;0.158996122864972;0.158996122864972;0.258951366019982;0.258951366019982	MS1 mz matched	385.166	50.075	265339	240285	279478	245200	240959	250266	253391	381154	246554	376126	367056	64167.4	15186.2	20312.1	1288569	48724.8	139857	952187	30663	63168.9	856776	30348.9	8730.05	237742	144366	568070	411664	847278	430739	10278.8	285648	21967.3	407863	78994.4	32224.8	13521.8	210914	22378.2	1010939	31401.4	956133
4394	negative	NA	NA	NA	NA	Unmapped	835.59	136.577	18210.7	21475.2	25291.3	21256.6	19058.9	18599.2	33270.7	23076.4	21482.2	17142.9	21172.2	35283.7	19938.5	15662.5	25479.4	16322.3	16135.5	15424	28211.5	17747.3	18925.1	20089.5	18781.8	16981.4	14110.6	16125.4	19259.4	19152.1	12087	24518.6	12323.2	19074.4	25683.6	21633.3	16036.6	16639.1	24079.7	22518.4	13304.6	26519.9	34202.7
3684	negative	NA	NA	Norbadione A;	22.9916092416091;	MS1 mz matched	659.508	161.896	58420.9	71105.9	68742.1	68415.7	68473.6	58666.8	57461.5	36362.5	51177	40731.8	50340.3	55750.2	93708.5	61959.6	101976	37533.2	40267.7	82689.3	52778.1	54126.9	34717.4	64343.7	49978.6	109595	51129.5	116810	112306	66928.1	93306.4	41941.5	108480	67142.6	159637	69840.1	72292.1	83429.4	57879.2	37405.3	77506.1	38256.2	94867.8
4640	negative	NA	NA	NA	NA	Unmapped	896.579	181.412	49822	51785.2	50034.6	72469.3	43259.5	66290.4	70808.9	61053.3	61465.4	45302.5	39264.7	46967.1	40407.1	99633.7	51750.2	55046.7	80134.9	38324.2	33232.3	76227.4	40436.1	84148	61633	59310.5	57683.5	56964.8	45134.7	48386.8	25916.7	65670.3	67159.9	54597.2	78584.6	94240.5	49431.5	76669.2	66704.8	42345.8	40979.6	65761.5	24917.1
1591	negative	NA	NA	(卤)-Fenarimol;Ferimol;Triarimol	-14.3025235133784;-14.398270231931;-14.398270231931	MS1 mz matched	329.028	437.548	3479.61	3218.01	2760.46	2318.61	2162.83	1900.12	2440.7	2602.86	2816.53	2188.42	1838.37	982.328	1003.64	1163.34	963.759	536.503	1107.84	1357.79	1116.51	950.321	887.824	1032.15	1098.64	1103.59	335.409	1036.57	978.336	941.684	892.117	1143.39	1050.01	849.129	1169.35	1158.89	1069.21	982.079	932.423	1051.27	944.446	1019.85	983.36
4559	negative	NA	NA	NA	NA	Unmapped	875.585	135.816	36342.1	32464.2	44505.6	29400.1	44881.2	32769.2	51368.2	36404.4	30872.1	31038.1	28578.7	20379.2	35643.9	31258.9	30433.2	21351.9	22319.7	47384	30859.6	30775.2	20179.3	66377.4	22135.6	35498.5	19132.5	25267.2	35216.8	63192.6	14676.8	29306.5	27097.6	34103.9	53308.9	26164.9	26537.2	23966.4	37364	34704.8	40457.3	38796.4	56887
3364	negative	NA	NA	3,5-Digalloylepicatechin;	7.40146878789237;	MS1 mz matched	593.473	108.998	294572	446647	302831	510032	506412	263519	424116	454337	419762	452849	414314	1070057	192888	254064	468955	408040	959558	109943	479456	451686	236060	263002	649385	138947	310445	288059	165841	31338.6	281956	516092	59024.3	159128	75911.9	776114	237072	184364	706009	227655	88958.4	644805	331982
2986	negative	NA	NA	NA	NA	Unmapped	530.298	177.075	2255949	1448384	1489127	1396990	1326437	1372327	1283265	1258924	1280732	1281236	1178918	1340136	5367844	971348	1109730	1007074	2772170	930634	1477261	1013675	1178380	1550231	1678414	1217369	5274415	3242683	971019	625878	642953	2257466	3657676	1591232	1523418	2243071	927106	1199433	2142873	1826150	775568	2088692	1828802
4608	negative	NA	NA	TG(15:0/o-18:0/22:1(13Z));TG(22:1(13Z)/15:0/o-18:0);TG(15:0/22:1(13Z)/o-18:0);	-8.28155464560103;-8.28155464560103;-8.28155464560103;	MS1 mz matched	888.5	57.236	24903.6	21349.7	20525.3	26198.4	25638.6	21923.2	22808.7	22020.6	24812.5	16391	11058.6	9314.69	24439.4	20238	17686.7	9509.89	15821.9	12965.2	14350.9	18503.7	10024.6	20745.8	26769.5	15168.8	16662.5	22400.2	16649.6	26642.2	17568.7	25330.8	17670.1	22785.1	19742.9	16227.5	21382	20667	18810.6	11086	20340.7	11687.6	31063.9
3779	negative	NA	NA	NA	NA	Unmapped	687.539	161.085	260944	419368	428359	361200	420716	329713	367392	223892	296445	278832	300694	274082	431948	477989	769212	267984	436009	271570	321829	285728	255655	890711	391876	398727	187034	433544	444997	273921	212020	169537	281397	338553	343144	587942	271074	329714	273203	215759	376529	289617	306524
3660	negative	NA	NA	2'''-N-Acetyl-6'''-deamino-6'''-hydroxyneomycin C	9.28029	MS1 mz matched	656.304	274.187	1727.23	2136.23	2720.88	2367.73	1989.22	1951.69	3217.91	1863.16	1685.62	2121.02	2092.33	4597.15	313.603	531.054	1157.61	1703.14	4692.12	344.289	1412.51	799.292	160.557	3989.1	315.306	624.088	26195.7	1107.04	334.961	435.083	2577.92	959.184	408.028	353.915	222.929	890.069	735.961	698.178	369.718	631.646	765.193	4833.94	1107.21
277	negative	3-Hydroxycapric acid	0.9995	NA	NA	MS2 reverse	169.123	54.21	63164.8	62615.7	41085.5	66736.4	71127.9	44176.1	67107.9	62582.3	43510.6	40494.2	64057	74085.5	19498	34159.8	84287.6	61387.9	55683.1	58209.4	58470.9	11946	82218.9	69098.5	32916.3	49854.2	27323.2	19800.4	40428.6	88933.2	73569.5	31127.7	30778.8	11993	157441	40716.2	12998.1	37148.1	119925	23382.1	21864.5	31479	113623
3092	negative	NA	NA	DG(15:0/14:1(9Z)/0:0);DG(15:0/0:0/14:1n5);DG(14:1(9Z)/15:0/0:0);	-15.3972566092248;-15.3972566092248;-15.3972566092248;	MS1 mz matched	545.416	109.1	36961.7	53782	50707.8	40353.8	56558.6	35371.4	53807.2	36841.8	35279.6	34765.5	34940.6	42599.8	16940.2	25518.3	106305	44085.2	49724.8	45800.9	49101.2	26185.6	78982.5	40944.8	62447.5	34199.5	25925	40011.2	30407.6	25165.2	68902	18269.1	17730	14424.6	34656.6	49067.8	65508.4	29310.9	81973.4	48152	43241.2	31388.1	62609
3558	negative	NA	NA	NA	NA	Unmapped	634.054	234.742	14825.1	13162.6	11659.7	10072	9690.47	9826.09	9090.29	8242.17	8363.77	8342.67	8926.24	9019.9	12183.3	14457.6	12062.9	8155.11	11349	10056.5	10620.3	12871	8858.28	10009.1	8854.23	10730.9	10544.2	13357.3	10115	8430.94	10379.2	9808.22	9634.24	9939.25	14118.2	12599.1	10781.7	9339.6	11301.9	9344.32	10494.2	5904	10070.7
3341	negative	NA	NA	NA	NA	Unmapped	591.019	349.051	55413.6	61994.5	77101.5	84689.1	78444.5	82457.2	102201	89999.7	99629.6	111997	109433	80106.6	72141.8	62099.6	77301.4	101074	81186	109392	107340	61104.7	107494	80807.8	79902.7	99269	104955	61916.1	86173.2	93944.6	99166.4	88947.3	86749.6	87032.6	64321.1	77086.5	78414.6	87983.6	97477.2	99055.3	104213	98668.8	87468.4
1148	negative	NA	NA	Xanthosine;Xanthosine	4.02392765032754;3.96795642866229	MS1 mz matched	283.077	254.046	44567.3	42687.1	70675.8	67162.4	45117.5	64556.1	53206.7	45441.2	42620.8	44073	43982.2	34137.7	48911.1	37000.9	54295	38006.8	41779.7	70366.3	31883.6	29954.7	37698.9	34092.6	46179.6	34307.9	57060.9	66302.8	36866.6	41655.3	70299.8	28987.3	66328.1	37618.5	62282.8	55993.5	87117.3	40529.5	35838.1	27293.3	54903.2	25799.6	61964.5
957	negative	NA	NA	NA	NA	Unmapped	263.011	349.693	115612	139095	166157	168178	160778	178331	224460	197707	215766	222176	242132	179646	163585	131032	179651	225985	161179	227051	202668	129039	238971	169829	164719	213350	210382	129302	195138	195133	219679	185546	198597	191294	148944	177030	164851	175783	199179	234881	200690	236848	221520
2646	negative	NA	NA	Chenodeoxyglycocholic acid;Deoxycholic acid glycine conjugate;Chenodeoxycholic acid glycine conjugate;Glycoursodeoxycholic acid;Glycodeoxycholate;Glycodeoxycholic acid;3alpha,12alpha-Dihydroxy-5beta-cholan-24-oylglycine;Glycochenodeoxycholate;Glycochenodeoxycholic acid;Chenodeoxyglycocholate	-9.17732113086249;-9.17732113086249;-9.17732113086249;-9.17732113086249;-9.12501966885526;-9.12501966885526	MS1 mz matched	484.279	200.745	33783	64912.9	75023.7	85398.8	86301.4	82189.2	79999.9	95310.1	71721.2	72018.1	80570.4	41543	23235.4	28044.8	100498	92671.8	138428	6104.06	24420.2	98526.7	30927.1	31202.5	12163.6	9579.08	40398.5	16424.5	125276	15494.3	11621.2	7435.1	7639.65	30646	63308.7	16609	17504.6	17025.2	6188.68	69448.5	9950.27	154221	10639.8
2511	negative	Glycocholic acid	0.9964	NA	NA	MS2 forward	464.298	243.713	140432	163247	153126	252704	168008	181411	178972	259588	150107	203977	207463	128339	61547.7	82788.7	116897	132147	687537	16930.7	40756.5	123573	64973.1	69993.9	25613.2	27125.7	217064	180984	453712	16959	45128.7	14256.6	7686.14	68780.1	60994.2	32487.9	31063.3	62452.7	9250.06	81839.8	51029.8	2388174	23140.5
662	negative	NA	NA	Selenocysteine;5-Nitro-ortho-anisidine;2-Methoxy-5-nitroaniline	5.95060993737788;-14.8762150150169	MS1 mz matched	227.064	365.625	9058.8	6584.24	5898.86	6788.49	6566.35	6231.98	6882.82	8295.73	5084.69	4625.84	4763.46	4583.27	10150.5	6504.57	6418.07	5615.11	6323.61	5237.89	6330.38	7023.93	8974.92	10770.5	5265.88	8853.95	3408.57	9095.19	8984.12	6279.14	4728.73	5460.9	8141.38	5286.5	9291.35	7321.8	6500.53	5191.08	12520	7830.49	6284.05	4662	8726.46
878	negative	NA	NA	NA	NA	Unmapped	254.893	420.895	7514.59	5760.24	5116.85	7027.54	4794.63	5772.99	5136.03	4994.27	4579.8	3324.9	4920.01	4788	7511.95	10165.5	5745.85	5396.56	7422.72	3858.45	4624	8073.43	4575.04	7076.17	7302.2	6251.12	3289.72	9556.16	5998.91	2992.86	5055.93	6500.3	7014.77	5817.38	5341.79	6457.26	5728.45	5574.56	5905.57	5758.53	4662.66	2591.03	4589.52
1663	negative	Erucic acid	0.9883	NA	NA	MS2 forward	337.308	39.061	16187.9	13262	15227.9	15826.5	14282.3	8568.56	17405.9	14711.4	12373.3	8197.65	14295.3	39159.1	3534.7	13821.2	9828.98	20361.5	46168.2	8537.81	30357.1	7313.52	13002.7	9135.38	12093.5	8102.35	6580.47	16057.4	5833.07	10942.5	8640.34	27459.2	21158.5	10540.5	12681.9	13434.7	17557.3	11084.1	6647.41	10473	2879.41	23977.7	22238.2
2802	negative	NA	NA	Phosphoadenosine phosphosulfate;Epothilone B;Patupilone	-6.51297943482301;-9.46999155272848	MS1 mz matched	506.261	200.749	5514.77	9850.68	10510.4	11872.5	12048.9	15211.4	11705.7	13530.3	11979.8	10779.2	13166.9	8677.95	3172.86	4029.72	17594.4	15514.2	18954.3	1876.75	5082.27	9042.99	5739.39	5485.41	2313.38	2283.03	5945.78	2599.85	16057.7	2263.08	2696.79	1941.97	2663.57	4551.93	8951.34	3204.05	2629.28	3381.9	1348.88	10724.9	1548.2	18116.1	3034.3
3389	negative	NA	NA	NA	NA	Unmapped	597.35	174.24	10322.6	10399.2	7046.33	8315.49	7526.88	6713.45	6428.55	5638.81	6966.36	6288.83	6189.06	9615.68	10843.2	11874.1	6000.85	22123.2	10334.4	1200.02	4877.32	6696.67	2913.78	10160.5	7147.34	8055.87	18573.8	5587.24	6939.44	2349.95	6748.57	9916.22	2577.8	6691.11	2319.36	19042.4	4517.89	9071.81	9121.66	9742.81	4872.28	26422.5	7692.66
2276	negative	NA	NA	Lorcainide;Calanolide A;3,17beta-Diacetoxyestra-1,3,5(10)-trien-6-one;3,17beta-Dihydroxyestra-1,3,5(10)-trien-6-one diacetate;6-Oxo-17beta-estradiol diacetate;6-Lilyl-2-O,3-dimethylflaviolin;7-O-Geranyl-2-O,3-dimethylflaviolin	-0.516503821811378;8.10420932628601;8.10420932628601;8.10420932628601;8.10420932628601	MS1 mz matched	429.192	51.0145	278940	252568	371339	263597	271176	242504	259783	271549	269775	455447	326699	177422	6680.65	17896.3	2172224	122999	114539	191298	26194.5	46601.4	715073	23671.1	15019.4	330451	593982	17578.7	323544	2894743	263688	6869.95	65851.9	16479.4	302807	26843.9	21151.6	19332.7	35109.6	14847.1	1669566	108142	1635259
3363	negative	NA	NA	3,5-Digalloylepicatechin;	-6.43389495896258;	MS1 mz matched	593.473	152.025	60588.6	90171.6	66623.2	65061.8	63671.3	55311	54610.9	55542.6	44956.5	44854.1	48505.7	101928	50344.6	76170.2	71053.1	43347.3	118222	20239.6	93683.8	67057.7	29603.9	71713.1	93235.4	34312.8	26065.3	54058	23948.7	14847.4	32396.4	61817.3	14760.9	30980.2	22434.1	106574	33349.1	47765.2	150532	49181	24816.9	60393.3	60992.8
868	negative	cis-9-Palmitoleic acid	1	NA	NA	MS2 forward	253.216	39.061	372028	381740	494759	401766	381794	584096	381143	387267	588871	316489	354510	460608	486656	213487	572665	1048206	276341	206586	392736	519580	1272521	1186713	254755	330392	402694	387590	175771	475424	418087	453380	570343	313898	652261	517269	288589	318693	456590	348091	90907.3	332673	858651
3913	negative	NA	NA	Fumonisin B1;Isofumonisin B1;Fumonisin B1	0.0223180721488129;0.0223180721488129;-0.018991153958968	MS1 mz matched	720.389	155.958	8271.67	8729.24	7661.85	8754.74	4677.76	11066.9	10571.8	10211.9	10596.3	7991.64	11552.8	7409.8	32460.7	6398	8824.53	8891.41	8043.87	9558.58	11180.2	6004.35	14692.9	8104.06	8544.41	12835.7	20592.9	11661	6162.06	6948.74	8429.35	11012	15055.4	13346.8	9383.23	11875.9	5655.02	5451.79	32619.4	28973.8	6210.05	6025.3	12384.1
3151	negative	alpha-Linolenic acid	0.9997	NA	NA	MS2 reverse	555.437	105.743	46151.7	35517.5	25084.3	33894.6	37567.5	26672.6	29739.7	28487.9	25615.3	22477.2	33269.9	33481.1	25304.9	45750.1	41984.4	25810.8	39508.4	29899.1	51579.9	18859.7	21453.7	21263.3	105594	24503.2	24136.1	37311.1	45991.1	6550.44	27366.5	21314.9	15011.6	12562.7	13424.4	43647.3	45055.6	41949.6	90672.8	19622.6	7989.02	38630.1	34706.1
2826	negative	NA	NA	Pyriprole	19.4728	MS1 mz matched	509.017	349.055	122924	154138	196850	222012	203136	225447	241668	236118	237602	283083	276744	219126	192647	148989	209626	266353	200766	256581	241920	155872	278823	192765	201133	253291	239338	154026	227031	238573	248131	251197	256003	208030	178102	197065	208956	223331	253219	258200	238065	271486	230929
3512	negative	NA	NA	NA	NA	Unmapped	623.295	27.777	5287.53	4405.87	6915.41	4676.11	3101.28	4019.26	4773.93	5237.26	5427.98	4045.3	3693.09	8071.43	4523.95	3826.72	5216.01	9118.65	4704.17	5137.64	4042.23	3575.2	3935.68	4772.69	3935.55	4393.69	3142.63	4158.01	7457.24	4390.19	4688.91	7028.63	5309.61	5780.52	5985.82	4451.82	2331.88	5077.39	1115.51	2501.7	4440.53	5786.25	5010.7
2248	negative	NA	NA	NA	NA	Unmapped	427.015	349.195	171856	194263	233974	248719	254098	258397	298742	312795	293739	353785	358265	268035	250302	190812	261282	330898	209200	334438	332304	181146	310396	256309	258858	265877	328590	179135	283776	299829	313069	298010	320199	275826	210524	238234	263700	284974	306131	313245	295134	325654	291752
574	negative	NA	NA	4,4'-Thiodianiline;4,4'-Thiobisbenzemine	3.03973	MS1 mz matched	215.073	193.525	13581.1	11892.6	16828.6	16392.4	20448.4	19258.3	19911	20913.5	23234.4	26467.8	21745.1	37196.3	2597.66	16302.5	20961.7	44880.2	17535.6	8021.95	33613.3	3142.67	14132.7	14643.4	12701.7	10172	24602.8	17751.3	9232.78	10369.7	18809.3	24367.2	10790.7	15526	6941.75	27089.7	37541.8	47070.7	14078.1	53642.9	8235.86	13541.1	20110.4
3037	negative	NA	NA	NA	NA	Unmapped	537.411	124.111	95472.1	168650	147064	115325	114096	110834	92179.2	92364.7	100730	116130	87732	180833	41061.4	115573	205590	85552.4	157609	88060.6	129556	73063.6	158037	138532	72463.2	164978	114402	139506	36690.4	61033.2	140836	66684.4	33983	58493	123774	109324	90096.4	51890.6	134902	77876.2	132547	90644.2	265612
355	negative	NA	NA	(-)-1-Methylpropyl 1-propenyl disulfide;Lichenin;Lichen;(R)-3,3-Dimethylmalate;3-Ethylmalate;2-Hydroxyadipate;2-Hydroxyadipic acid;(R)-2-Ethylmalate;L-Rhamnono-1,4-lactone;L-Rhamno-1,4-lactone;(2R,3S)-2,3-Dimethylmalate;3-Hydroxy-3-methylglutarate;3-Hydorxy-3-methylglutaric acid;beta-Hydroxy-beta-methylglutaric acid;Dicrotalic acid;3-Hydroxy-3-methylpentanedioic acid;Meglutol;2-Dehydro-3-deoxy-L-…	1.90183880776179;7.40499392797541;7.40499392797541;7.40499392797541;7.40499392797541;7.40499392797541;7.40499392797541;7.40499392797541;7.40499392797541;7.40499392797541;7.40499392797541;7.40499392797541;7.40499392797541;7.40499392797541;7.40499392797541;7.40499392797541;7.40499392797541;7.40499392797541;7.40499392797541;7.40499392797541;7.40499392797541	MS1 mz matched	183.03	107.864	360646	352053	228978	393163	398382	380292	232634	225209	402108	394809	417855	30822.6	525176	722307	35078	61483.2	336625	5541.78	355557	144495	21092.6	197741	149808	50388.2	47777.6	230363	11134.3	10211	113727	140405	45770.8	873255	31293.5	192158	63658.1	1005391	736458	318189	25639.2	104767	10880.6
5121	negative	NA	NA	Ganglioside GM3 (d18:1/16:0);	-19.2762612674724;	MS1 mz matched	1151.69	249.287	3538.34	6799.24	5849.37	5768.41	8751.17	5976.32	7296.45	6686.17	5217.27	5153.01	7326.94	4117.95	5429.9	7338.78	7764.93	4738.3	5405.16	4610.52	7674.1	6895.22	4403.32	9412.24	4855.19	4897.41	4642.11	5129.76	5981.07	5945.19	8099.64	4319.23	10421	5782.37	7285.93	10893.7	5238.71	7868.26	5591.02	5236.89	6031.73	8028.61	12078.4
2567	negative	NA	NA	NA	NA	Unmapped	473.278	27.3005	10967.6	15868.7	11108	9387.98	9569.33	8862.69	9894.71	13963	7212.81	12461.7	11530.8	10693	7163.5	11797.8	10718.2	15299.8	9825.27	12630.6	4440.59	10482.3	8365.78	12055.5	12935.7	11085.7	9468.78	13942.8	14322.8	6483.84	10086.2	13310.2	9935.1	12590.5	10552.9	10677.6	8324.81	9976.04	9681.51	12721.2	7243.32	8980.83	13103.1
2528	negative	NA	NA	NA	NA	Unmapped	467.37	104.697	208481	237168	227129	237063	384791	215440	204401	261251	283376	217942	191038	506627	111202	161989	622700	170490	309160	157054	243150	118416	291614	164635	123378	193356	189988	165921	159051	156962	201138	132001	100478	142526	194258	184872	167863	158856	858415	150110	187490	159456	192654
892	negative	Palmitic acid	0.9997	NA	NA	MS2 forward	255.232	39.058	1662575	1809540	2292883	1982843	1760731	2655065	1649505	1691796	2733782	1422197	2445036	1980711	1727065	1698116	3026321	3920187	2019206	1511814	1565046	2930500	1840642	2080832	2223600	1529074	2590041	1553716	1968790	1660532	1061974	1874960	2327483	2128315	2789009	2974201	2368303	1133049	1768186	2897753	431680	1828130	2244525
3255	negative	NA	NA	NA	NA	Unmapped	574.988	349.079	237261	257252	311673	364237	393832	395130	419496	409632	468258	490008	486010	386744	339333	258236	340374	473493	330161	464953	483790	245481	458781	366718	357459	368822	470790	241124	393903	410072	428689	444992	409166	391200	306339	325344	336791	379973	434836	436066	344877	445055	421365
3029	negative	NA	NA	NA	NA	Unmapped	537.011	349.027	92986.8	102988	77303.4	62200.4	71310	71656.7	63480.3	58750.5	62997.4	53422.7	54378.2	61283.5	78491.4	90082.5	75690.2	60738	91935.1	64707.1	60905.7	113080	57915	80987.9	82476.9	63483.5	59785	88894.7	71948.5	75191.8	65080.2	67645.1	78947.8	59758	99336.5	90544.9	77987.1	67387.1	62072.1	54075.2	64246	50813.1	60750.4
3824	negative	NA	NA	PE(P-18:1(9Z)/16:1(9Z));PE(P-16:0/18:2(9Z,12Z));PE(18:2(9Z,12Z)/P-16:0);PE(16:1(9Z)/P-18:1(11Z));PE(P-18:1(11Z)/16:1(9Z));PE(16:1(9Z)/P-18:1(9Z));	-20.428571122532;-20.428571122532;-20.428571122532;-20.428571122532;-20.428571122532;-20.428571122532;	MS1 mz matched	698.494	349.058	21187.8	24531.9	29005.6	32949.5	33354.3	40568.6	43587.9	39903	41051.8	42750.2	43948.9	38596.8	29465.6	25052.1	38274.7	43872	28988.4	46408.7	43529.4	21983.2	42499.5	36530.3	33287.1	43360.3	44692.2	23130.9	37895.8	44319.6	44476.3	39659.3	39735.3	35061.7	23599.1	30486.9	35356.6	40447.6	43227.8	45571	39193.7	38971.6	41559.8
1232	negative	NA	NA	norsertraline;12-OPDA;(15Z)-12-Oxophyto-10,15-dienoate;(15Z)-12-Oxophyto-10,15-dienoic acid;9(S),13(S)-12-Oxo-PDA;12-Oxo-10,15(Z)-phytodienoic acid;(9Z,15Z)-(13S)-12,13-Epoxyoctadeca-9,11,15-trienoic acid;(9Z,15Z)-(13S)-12,13-Epoxyoctadeca-9,11,15-trienoate;(9Z)-(13S)-12,13-Epoxyoctadeca-9,11,15-trienoate;12,13(S)-EOT;12,13(S)-EOTrE;alpha-Licanic acid;(9Z,11E,13E)-4-Oxooctadeca-9,11,13-trienoic a…	-17.8382836587853;-20.5760500033696;-20.5760500033696;-20.5760500033696;-20.5760500033696;-20.5760500033696;-20.5760500033696;-20.5760500033696;-20.5760500033696;-20.5760500033696	MS1 mz matched	291.198	32.975	13213.8	10671.9	8637.67	8867.4	7521.98	7466.37	8073.28	7948.68	10802.7	5846.92	9639.93	24721.2	25453.7	133822	26167.2	273694	18327.5	90375	111926	28523.9	73236.1	5990.24	14924.9	148714	15637.7	57227.1	48218	22621.4	558775	119653	120000	68090.7	87975.1	23392.8	17395.6	45041.9	6218.66	788713	4276.8	1408440	19479.7
3728	negative	NA	NA	Adenosine thiamine diphosphate;	-14.8249177216932;	MS1 mz matched	673.523	175.951	19205.8	18045.4	18280.5	26474.6	13900.3	18056.3	24278.7	22850.6	11793.2	19776.3	16707.8	19366.4	19989.2	26469.5	24662.2	23514.4	15299.9	15172.6	18301.3	24923.5	12686	26572.2	19039.2	18549.3	22245.1	27041	23871.9	16425	27573.6	25491	32361.4	21044.8	26412.4	19687.4	17117.4	30650.6	18668.2	27709.5	14358.2	18640	17327.1
3683	negative	NA	NA	NA	NA	Unmapped	659.507	176.696	72464	52457.4	52638.6	76247.5	45199.9	49976.8	46639.5	44718.8	38665.2	43727.3	50533.2	74757.2	55156.7	62021.6	93563.6	49313.4	32608	63161.6	60658.7	73502	43271.5	49720.5	35427.7	110058	56349.2	87393.1	97713.1	72901	76435	57877.7	109188	50927.6	119438	43061.5	61221.4	90313.4	52143	56671	44947.4	45130.1	69325.4
3828	negative	NA	NA	Posaconazole;	10.2363214284407;	MS1 mz matched	699.337	203.144	2259.32	2336.46	2826.4	3464.74	3129.32	1864.74	1861.39	3288.68	2319.89	2156.67	2125.19	2359	184.339	238.732	581.154	250.861	11099.8	76.5719	764.296	163.688	277.247	446.718	9577.85	278.352	597.077	176.623	399.578	76.399	184.553	234.35	114.92	94.4214	158.118	1195.3	228.683	244.771	4422.55	1121.17	82.3407	971.003	193.429
601	negative	NA	NA	Phosphoramide mustard;Isophosphamide mustard;Phosphoramide mustard;Phosphamide mustard;Isophosphamide mustard	15.8209205795415;15.8209205795415;15.9095609643126;15.9095609643126	MS1 mz matched	218.99	203.631	5069.05	8827.06	11818.8	12211.6	14627.8	13263.2	11988.8	13307.8	11997.8	10408.8	11298	4778.13	3307.64	6879.1	8109.39	7405.81	10698.6	4875.51	9331.54	5398.23	7021.3	21914.6	15405.5	1597.55	21843.2	6415.3	8827.5	14358.6	17392.7	15884.3	21780.4	3479.66	9409.7	10764.1	5877.58	3591.09	2950.69	24021.2	5786.57	10789	11813.3
4038	negative	NA	NA	NA	NA	Unmapped	747.558	41.661	11597.3	7631.81	8582.93	15873.4	9433.04	8672.38	13444.4	9755.46	11334.3	10015.7	9456.75	6919.15	12968.1	20145.2	9426.07	11448.8	9471.95	8765.18	12409	10085.9	8040.23	15270.5	12522.6	17279.5	10652.7	19017	18645.1	19442.2	7375.03	16081.6	13866.5	6024.55	25503.3	9004.09	7958.1	20926.2	16858.1	17371.3	7123.8	8121.83	37201.1
3110	negative	NA	NA	Desglucocheirotoxin;Manumycin A;Manumycin	-17.2134875172451;0.773077986061721	MS1 mz matched	549.268	349.191	24411	21144.8	21906.1	21576.1	19780	16813.8	14259.4	12704.4	17777.2	15098.5	12170	17152.2	12270.1	18514.9	16426.4	18999.7	20607.3	9803.08	10776	26556.7	17500.1	16814.6	22251.4	17919.1	14956.7	25849.9	19158.7	20180.1	11537.6	19205.9	22416.5	19408.8	17004.3	20114.4	18306	12031.2	16245.1	14651.3	16872.2	11186.8	9629.38
862	negative	NA	NA	NA	NA	Unmapped	252.914	421.116	9754.36	11276.8	11162.4	12134.4	8665.65	6184.63	7310.21	10668.1	7747.7	7552.35	6783.43	7922.52	8452.69	11058.4	7536.05	5668.18	11281.4	7228.71	7334.6	12203.6	8074.73	9070.36	8111.06	8974.88	6590.37	10938.4	8123.68	8451.05	9218.53	5971.68	8939.55	7188.44	10931.9	9618.74	7395.95	8252.6	7670.18	7505.48	7582.16	7073.78	6766.03
4749	negative	NA	NA	TG(15:0/22:0/22:2(13Z,16Z));TG(18:0/22:0/20:2n6);TG(18:0/18:2(9Z,12Z)/22:0);TG(15:0/22:2(13Z,16Z)/22:0);TG(18:0/22:0/18:2(9Z,12Z));TG(22:0/18:0/20:2n6);TG(20:0/20:0/20:2n6);TG(15:0/22:1(13Z)/22:1(13Z));TG(22:0/15:0/22:2(13Z,16Z));TG(20:0/20:0/18:2(9Z,12Z));TG(22:0/18:0/18:2(9Z,12Z));TG(16:0/18:2(9Z,12Z)/24:0);TG(18:0/20:2n6/22:0);TG(15:0/20:1(11Z)/24:1(15Z));TG(20:1(11Z)/15:0/24:1(15Z));TG(20:0/2…	20.2371434348529;20.2371434348529;20.2371434348529;20.2371434348529;20.2371434348529;20.2371434348529;20.2371434348529;20.2371434348529;20.2371434348529;20.2371434348529;20.2371434348529;20.2371434348529;20.2371434348529;20.2371434348529;20.2371434348529;20.2371434348529;20.2371434348529;20.2371434348529;20.2371434348529;20.2371434348529;20.2371434348529;20.2371434348529;20.2371434348529;20.23714…	MS1 mz matched	956.6	149.317	11761.9	19890.5	22644	17426.4	17061.5	16188.7	18054.3	16975.6	28477.3	18135	16710.5	15476.5	13702.4	16962.3	23266.8	21108.9	18519.9	13716.3	15605.8	9094.38	29457.4	17319.7	14480.7	12610	20162.9	15392.2	12870.7	13223.5	32660	17824.9	11686.6	20455.7	9594.37	11568.8	11261.7	12375.4	16698	16855.5	16731.6	15438.7	14817.4
569	negative	NA	NA	Bentoquatam;Theophylline;1,3-Dimethylxanthine;Theobromine;3,7-Dimethylxanthine;1,7-Dimethylxanthine;Paraxanthine	22.7700739027407;1.66606780790438;1.66606780790438;1.66606780790438	MS1 mz matched	215.032	299.682	647374	465435	481631	416209	495708	394473	444377	349637	311132	300132	397380	532816	211253	458671	401855	263082	439963	256607	295578	608321	420774	391630	206522	446725	204646	461856	514864	496854	282307	446336	100614	531996	596782	248153	468047	472263	366280	448189	595451	338315	276560
2857	negative	NA	NA	NA	NA	Unmapped	511.298	200.707	27951.8	53850.9	70240.5	74860	77574.6	82547.9	77920.6	83553.5	74580.9	70340.3	72966.6	53910.5	27500.2	27301.1	96953.4	96182.4	113922	8090.85	28725.2	70632.1	32453.5	32047.2	14758.9	11313.1	43604.1	13922.1	112822	14174.4	14184.7	9409.22	11285.7	36810.3	53132	16699.2	18176.6	23739.8	5248.46	73435.5	8863.48	164219	13428.8
3190	negative	NA	NA	Cholesterol glucuronide;Rhodoxanthin	-23.3744753576321;-12.9652294502527	MS1 mz matched	561.374	174.315	26903.3	36016.8	21187.4	20777.1	20019	35169.8	33164.3	24440.9	26757.6	19551.3	25411.1	33525.5	23102.6	51412.3	21174.7	51374.4	42171.8	6082.32	26131.9	18760.9	7730.8	46246.2	13276.4	15820.4	63865.1	22550.5	18768	8414.05	34753.8	39879.9	9860.52	27444.6	12015.1	61490.8	21552	38381.9	27285.9	19741	6995.3	91518.7	28480
3902	negative	NA	NA	NA	NA	Unmapped	718.372	156.049	3992.59	3665.11	1940.67	3146.08	4680.85	4633.54	5248.25	4372.41	5039.67	3923.14	4665.99	2065.28	9252.35	4109.72	2810.1	5431.24	2842.54	2316.05	3409.82	3000.86	5891.96	3203.09	3147.39	3554.84	8449.27	4344.96	2293.09	2316.93	5724.34	3788.06	6059.1	2348.36	1883.25	2073.14	2805.31	1717.36	10066.6	9198.32	2403.53	2617.43	3679.65
3493	negative	NA	NA	Lanceotoxin A;Scilliroside;Scillirosidin 3-O-beta-D-glucoside	0.0396592975510196;0.0396592975510196	MS1 mz matched	619.283	236.01	25924.2	31364.7	33643.8	22234.9	29169.6	20878.5	31747.1	28067.7	14632.3	31087.1	19833	28043.6	21070.7	16449.8	24661.8	15782.7	13549.9	20935.7	17441.7	15591.9	27140.9	17219.8	15382.5	18845.5	17025	28833.5	21778.1	28542.4	24017.6	16673.7	19877.6	11762.6	20457.9	21087.3	24747.7	24023.9	23053.3	15399.9	16296.6	17795.3	24003
3952	negative	NA	NA	PS(18:2(9Z,12Z)/14:0);PS(16:1(9Z)/16:1(9Z));PS(14:0/18:2(9Z,12Z));PS(14:1(9Z)/18:1(9Z));PS(18:1(9Z)/14:1(9Z));Spinosyn A;Spinosad factor A	-0.788681771115383;-0.788681771115383;-0.788681771115383;-0.788681771115383;-0.788681771115383;16.8937282763903	MS1 mz matched	730.473	40.951	2848.22	5919.83	6319.29	5761.14	6818.25	5242.03	5169.21	6202.71	5457.04	3292.16	4939.88	5415.96	4889.32	13522	3075.52	4616.66	7980.16	10482	6527.53	18795.7	3343.34	12407.8	12031	6292.9	3567.85	12456.9	15973.5	8369.24	3430.09	4902.11	11822.8	6092.84	16592.7	6404.52	8683.64	8467.26	7574.77	7680.01	7163.51	5885.57	12298.8
301	negative	NA	NA	NA	NA	Unmapped	174.938	421.118	28596.8	32219.3	21956.4	29579.2	21633.2	18726.8	18011.4	26722.8	18659.1	19056.1	17458.1	23327.7	25377.8	31377.8	25545.6	17343.2	34793.1	22459.3	20051.2	34918.9	19337	32943.7	25711.8	30244.6	22384.2	32232.4	22956.5	15618.7	31127.9	23000.7	28412.2	25495.7	30294.4	25377.1	26312	23141.7	24252.1	24756.3	20780	20434.1	21574.4
3813	negative	NA	NA	(2'S)-Deoxymyxol 2'-alpha-L-fucoside	-9.65729	MS1 mz matched	695.458	40.359	8230.64	8316.37	6039.51	5543.68	9659.79	8319.36	5576.64	7132.13	7389.94	3928.32	7216.64	9431.45	4600.79	10918.2	6217.93	4464.38	8954.23	11069	10323	13510.6	6708.72	13201	11604.5	6936.39	7830.66	9034.62	11446.6	13847.6	2445.81	10294.1	16108.1	5637.62	15687.2	9295.02	13124.4	10123.9	12097.3	10255	7345.92	7284.36	12354.6
3822	negative	NA	NA	NA	NA	Unmapped	697.991	349.099	58378.2	66236.1	74642.4	93794.4	95225.6	102543	125781	96392.8	111312	114969	123862	105213	62079.3	60180.6	90025.6	121130	80769.1	121420	114076	44088.7	130580	77029.2	81068.2	108801	130537	36490.6	92631.4	102969	109448	110457	105787	107906	67193.7	74758.6	90954.8	114512	112511	124174	92663.2	112530	106004
3072	negative	NA	NA	Physagulin C;	16.5070979667611;	MS1 mz matched	541.26	304.836	1663.75	2129.86	2507.16	2339.48	2335.2	2566.91	2266.64	2322.21	3863.21	2458.68	1871.17	3547.86	1379.35	1584.88	4429.94	2918.59	1639.56	2427.15	983.926	1170.4	4914.68	857.359	1331.72	3732.35	2271.39	691.09	2573.4	6852.24	3764.04	694.178	1108.45	2137.71	2821.51	1496.23	3053.04	1886.89	2581.11	3302.96	4900.59	2432.83	3110.23
3462	negative	NA	NA	Catechin 3',5-diglucoside;Catechin 3',4'-diglucoside;Catechin 3',7-diglucoside;	-23.0728437897319;-23.0728437897319;-23.0728437897319;	MS1 mz matched	613.535	37.713	11733.8	10686.5	7023.59	9171.36	11288.7	10637.4	8909.59	8565.5	10215.7	4366.89	8189.94	4690.63	1346.55	2454.51	1387.3	5434.01	3194.6	1780.56	3347.18	4278.69	3238.65	2181.55	3628.4	2238.99	2164.72	2433.57	3001.44	1043.45	1183.03	3911.7	2925.14	1916.63	2309.23	3239.52	1681.08	3154.66	4040.82	3211.37	638.309	4126.93	2523.58
2943	negative	NA	NA	NA	NA	Unmapped	524.274	179.111	126294	209718	137399	123976	107896	120298	121373	101149	172049	171693	149307	65515.2	79753.2	91447.9	95160.5	100341	80636.6	140204	121369	252417	171156	206402	114978	176456	140752	190909	101847	169851	30780.1	264857	66867.9	116619	138186	119153	195868	98502	238920	108433	64983.3	56962.7	455511
4506	negative	NA	NA	Azaspiracid 3;Mycobactin S	18.1554407503253;-8.942550637888	MS1 mz matched	862.476	57.5265	69645.9	60688.2	52617.3	60323.3	62514.6	61781.6	60780.3	52434.2	37170.8	25722.8	51465.8	36981.7	57993.6	49130.3	47623.4	33816.9	33684.5	58547.2	43921	50883.2	31177.4	40075.6	81848.6	40545.4	57540.7	53894.9	56834.8	59682.8	72770.6	78097.5	107554	56697.3	92242.8	44781.9	50174.8	59549.6	43616.5	59235.3	56126.5	35726.2	63894.7
3302	negative	Biliverdin	0.9832	NA	NA	MS2 forward	581.235	225.993	4455.68	7263.07	11180.4	6411.82	7108.59	7438.14	6958.06	7549.92	7170.88	5765.98	6130.17	44601.3	3371.79	6069.28	7069.94	9544.31	7477.77	2261.45	6923.76	4666.57	8340.58	6588.65	4467.03	3741.55	10643.2	3030.63	3800.37	12364.3	7814.07	3079.97	4729.08	4748.31	7019.09	6670.56	2300.67	5944.33	12232.2	932.799	5414.48	16357.9	13625.8
2360	negative	NA	NA	Difecoum	-3.93181	MS1 mz matched	443.171	47.6685	87649.4	50712.8	56405.3	47060.7	80523.8	85513.9	51844.1	92988.1	79992.9	80750.8	73117.9	100008	9892.65	10674.1	254837	61244.2	68607.7	31099.7	18889.9	20413.9	82880.4	16464.7	9260.17	31075.1	150565	15671.2	36479.6	229047	85653.2	4982.44	25133.8	12399.1	42046	28286.2	17309.6	21066.4	6292.66	13353.7	227268	93806.4	217716
4396	negative	NA	NA	PS(22:6(4Z,7Z,10Z,13Z,16Z,19Z)/20:4(5Z,8Z,11Z,14Z));PS(20:4(5Z,8Z,11Z,14Z)/22:6(4Z,7Z,10Z,13Z,16Z,19Z));	-11.7288614327563;-11.7288614327563;	MS1 mz matched	836.475	57.93	181818	193297	118834	126069	127356	151796	131937	106626	126972	97059.1	100195	65938.5	122672	116756	75913.2	72603.6	85947.9	121776	73916.8	156974	52786.2	161748	204990	116285	108694	175470	111069	97638.2	98922.1	102116	223610	111728	217973	98971.8	139995	234911	63551.9	125552	168698	84210.4	100995
2409	negative	NA	NA	Myricetin 3-arabinoside;Phylloquinone;Vitamin K1;Phytodione;2-Methyl-3-phytyl-1,4-phthoquinone	21.5259386206156;21.3038842250644	MS1 mz matched	449.359	74.699	147442	137444	174604	94148.9	61117.4	141000	134776	153483	136727	163468	135396	206912	111082	86094.9	270765	107026	71548.6	190264	72695.6	121201	170366	119702	130548	153786	93040.1	96085.4	124602	120338	169001	80984.9	119570	80062.1	168975	162693	128734	171011	231715	43656.2	124989	119393	154703
1642	negative	NA	NA	4-Hydroxy-5-(dihydroxyphenyl)-valeric acid-O-methyl-O-sulphate;2,2-Bis(4-hydroxyphenyl)hexafluoropropane;Bisphenol AF	10.4067381662863;-10.4148533662267	MS1 mz matched	335.047	323.75	5498.59	4887.26	5354.13	4784.95	4468.22	4695.49	3846.73	3498.82	2857.33	3105.96	2809.33	4254.37	8456.93	6195.25	7527.76	8009.09	3101.04	1950.01	1840.28	1675.62	6570.03	5007.9	4172.36	2169.75	4126.08	4198.66	2603.35	7837.79	54812.9	3275.63	4017.76	9980.51	1635.29	4051.91	2466.14	3701.58	20635.9	10039.1	4121.22	1934.94	4736.67
4123	negative	NA	NA	NA	NA	Unmapped	769.616	169.941	22981.6	20852	21411.5	16516.6	29929.1	16169.4	19060	19372.3	27584	13934.4	17540.8	8449.95	10703.6	16473.3	12073.5	10416.5	30166.3	28936.9	8771.51	24560.4	11159.8	32987.7	27794	19426.1	12636	27465.3	19772.5	18118.8	9958.83	22145.9	15434.9	13552.7	38382.3	24059.8	16085.2	24034.8	18016	8821.87	13629.9	17179.6	28409.1
782	negative	Pentadecanoic Acid	0.9989	NA	NA	MS2 forward	241.216	39.688	18699.3	19273	17298.1	20274.2	32429.1	18747	15555.3	16047.4	18894.4	16904.4	18104.3	20126.1	58361	12464.5	30481.6	49101.9	77870.2	55469.7	37262.4	35553.5	36160.6	37250.7	36643.3	15030	31411.1	27199.2	27291.6	31808.2	24591.1	53933.8	41756.9	78141.9	22749.6	21060.1	14564.7	38900.3	17185.8	29467.9	5485.01	21720.8	18481.6
732	negative	NA	NA	NA	NA	Unmapped	236.883	420.884	6204.73	3400.49	3734.07	4660.76	4087.51	4357.22	3684.84	5040.94	2844.88	2906.85	4166.68	4477.16	7823.52	9810.99	6617.91	5594.94	7115.37	4259.82	3222.01	8310.34	3571.55	5815.15	5687.7	7213.58	3249.47	9222.4	6475.7	2712.01	4270.59	6295.77	6293.87	7331.07	4585	7081.02	5029.35	4353.96	5179.1	4125.76	3440.85	2375.43	4414.18
906	negative	NA	NA	1,3,5-Trihydroxy-10-methylacridone;	-24.1932286170731;	MS1 mz matched	256.235	39.061	336853	367091	486983	367526	539480	559616	326325	350677	551333	288856	469163	444218	312098	334937	612459	802596	431089	298346	312546	603067	633990	728766	452011	321726	526498	265233	395786	337839	258826	343311	669086	431046	577973	611390	480992	207172	365757	554395	83120.6	378281	451008
110	negative	Hydroxyproline	0.8033	NA	NA	MS2 forward	130.052	340.421	2357.66	2987.42	2565.53	3241.49	2041.46	3693.29	3848.33	4207.37	3054.34	4061.11	4405.93	2030.82	4537.98	2242.85	2837.82	5490.37	3324.58	7109.68	3220.29	1573.49	4381.72	7385.26	4644.85	2958.75	4700.1	4004.69	6293.43	6155.31	3283.84	3398.51	6225.32	2743.92	3594.86	4600.53	1618.26	2537.22	5189.85	5873.53	4430.01	3856.4	10932.8
2718	negative	NA	NA	Glyburide;Micozole nitrate	-22.2670261779745;-18.2396934724669	MS1 mz matched	492.986	349.611	132118	180000	213370	227244	224880	234897	285210	262458	285928	337719	301193	240957	223168	160647	243058	324321	216937	319184	341847	166860	326766	231250	220440	254727	328968	156903	249829	266706	285879	278797	269949	247407	172175	213227	227753	296321	294600	297886	282072	305734	281773
1255	negative	NA	NA	Phytuberin;Nordihydrocapsiate;Gingerol;Myrsinone;Tanacetol A;Phytuberin;Embelin;[6]-Gingerol;(S)-(+)-[6]Gingerol;6-Gingerol	3.02770611859043;3.02770611859043;3.02770611859043;3.02770611859043;3.02770611859043;3.05931917911483;3.05931917911483;3.05931917911483	MS1 mz matched	293.177	27.209	73470.6	88335.7	67727.8	76302.4	69937.9	62772.3	72696.9	69072.6	73746.4	62756.8	23478.2	55000.2	93826	84997.8	41372.7	98562.1	66684.8	185567	103334	79707.1	126626	120388	135778	156771	86869.6	81186.5	120613	62789.3	85338.9	106744	102610	108530	72515.3	100134	51343.6	58405.3	55788.2	94953	33173.8	59787.8	97136.8
2438	negative	LysoPE(16:0/0:0)	0.9711	NA	NA	MS2 forward	452.274	186.795	72074	59954.7	90950.2	87835.4	35501.6	87057.9	80551.5	85795.1	82490.8	51663.8	71209.6	58061.2	371403	71998.2	94121.3	73266.7	90882.9	71251	104778	30254.2	85765.7	93611.1	164508	100334	201018	144165	56196.3	33090.6	34926	169055	53932.1	151553	59360.2	161824	79836.6	96360.2	177366	128731	60762.7	34942	48911.6
3144	negative	NA	NA	Aurasperone D;6-O-Demethylnigerone;Dianhydroaurasperone C;Aurasperone D	22.8828529891637;22.8828529891637;22.8828529891637;22.9673664884282	MS1 mz matched	555.15	292.4	2585.25	3814.38	4818.93	4310.62	3822.94	4864.9	6136.88	5475.28	5498.78	6554.99	5739.69	3790.63	3256.72	4132.7	3663.64	5668.75	3668.24	5275.95	5454.42	2225.97	5094.58	3470.05	3539.34	4903.23	5738.72	3577.02	4635.56	3837.76	5990.31	4650.75	1970.98	6204.89	3375.83	2154.13	3859.27	5074.74	6405.83	5997.52	2760.89	6770.26	4168.84
2654	negative	NA	NA	Prostaglandin D2-1-glyceryl ester ;Prostaglandin PGE2 1-glyceryl ester;Prostaglandin PGE2 glyceryl ester;	0.578048576724196;0.578048576724196;0.578048576724196;	MS1 mz matched	485.276	29.03	7728.1	15394.2	11991.3	10533	8790.92	8392.74	10001.1	15163.4	8316.64	12070.6	10523.9	12533	21038.3	12408	18160.4	37576.6	8883.84	38028.7	25371.9	13160.5	38158.5	35624.9	16926	24694.5	16704.2	11410.8	23185.8	14930.5	11436.8	32921.2	17010.7	14089.7	15668.4	8944.72	9283.36	11869	9386.53	11071	10081.6	14369.6	12982.1
88	negative	NA	NA	Ethylphosphate;	-2.38004003223961;	MS1 mz matched	125.045	368.245	164661	139929	105957	126455	114583	105296	94644.8	91521.1	82458.4	82920.7	81775.7	113092	129490	151592	117259	70588.3	134098	147400	82752.6	166704	84348.5	130523	144615	82776.3	77999.6	172448	142221	122785	85915.4	91060.8	105912	145100	121052	137380	166064	92324.7	55926.3	88904.5	118403	77857	75949.2
4153	negative	NA	NA	PC(14:1(9Z)/18:2(9Z,12Z));PE(20:3(8Z,11Z,14Z)/15:0);PE(15:0/20:3(5Z,8Z,11Z));PC(18:3(9Z,12Z,15Z)/14:0);PC(14:0/18:3(9Z,12Z,15Z));PC(18:2(9Z,12Z)/14:1(9Z));PC(14:0/18:3(6Z,9Z,12Z));PE(20:3(5Z,8Z,11Z)/15:0);PE(15:0/20:3(8Z,11Z,14Z));PC(18:3(6Z,9Z,12Z)/14:0);	-0.274728595707589;-0.274728595707589;-0.274728595707589;-0.274728595707589;-0.274728595707589;-0.274728595707589;-0.274728595707589;-0.274728595707589;-0.274728595707589;-0.274728595707589;	MS1 mz matched	779.993	349.071	48764.3	45455.4	66467	77544.4	93046.5	97801.3	105792	91860.5	91967.4	89876	95774.9	85816.3	75879.4	51126.7	87773.6	106296	72174.6	107669	88210.9	57236.6	108655	71218.9	75016.2	92067.9	96519.2	57698.1	92972.8	94935.8	100979	90912.6	102512	88562.2	59569.9	72369.2	78112.5	97296.9	100925	90342.2	95518.5	95719.1	102787
4196	negative	NA	NA	NA	NA	Unmapped	792.525	144.7	234822	389627	423155	677054	502304	562698	505447	521575	404537	579021	437427	552632	475388	768025	544429	377534	557975	307419	382316	325703	451734	620502	575623	537271	513412	468400	638156	436280	445150	449728	482811	306452	494369	604133	661225	607616	524199	346113	576715	416637	455277
4214	negative	NA	NA	(-)-Epigallocatechin 3-gallate 7-glucoside 4"-glucuronide;	-6.15939718541346;	MS1 mz matched	795.631	168.822	43759.1	27747.6	49029.4	39544.8	34604.8	28471.1	24438.9	24452.3	34794.7	31614.6	26016.5	21301.9	17239.1	35104.1	27285.7	18394	61380.9	30220.5	25234.8	33487.5	25591	42001.9	41338.2	19062.2	22461.4	31167.5	36811.4	29900.5	12951.2	22381.3	22167.3	19863.4	48904.8	35900.5	28575.1	41897.1	19791.9	25833.4	19590.4	40828	39097.2
211	negative	NA	NA	NA	NA	Unmapped	156.992	315.296	343869	317125	295819	265012	264217	224257	216999	199815	195176	170546	167470	217236	392604	330508	179297	190754	246693	293926	199364	294425	201601	246446	335185	285585	169726	337208	275683	219793	220096	212061	390484	203747	324380	318836	364067	179761	212048	192886	187409	143890	248758
148	negative	3-Hydroxyisovaleric acid	0.774	NA	NA	MS2 reverse	139.041	108.316	16470.2	19971.2	20570.1	31283.5	20133.5	30945.9	22274	33424.9	19860.2	19338.7	21547	4847.71	28016.4	58037.4	6109.11	6931.65	23504.3	2982.22	18395.8	15344.5	4294.51	10314.9	9551.65	6057.77	6417.28	15303.2	3716.96	6067.71	11510.8	6460.73	4691.71	79649.8	4416.56	15378.3	6056.32	82102.9	74228.8	34720.9	3683.1	6462.34	3357.74
3597	negative	NA	NA	NA	NA	Unmapped	642.215	35.594	9591.57	20127.4	21631.3	16020	18006.4	21118.4	16824.8	13517.1	9813.44	16688.5	17556.2	18685	3633.57	21734.1	21413.6	14880.4	13023.9	9342.97	12778.8	15889	26092.8	37722.8	8572.91	2365.61	13601.1	10753.3	13655.2	65311	13334.8	8600.38	9797.69	19342.3	26155.5	21131.4	7581.76	10874.5	24087.2	340.261	42465.5	18211.8	18285.2
1341	negative	Eicosapentaenoic acid	0.9673	NA	NA	MS2 reverse	301.215	39.033	31937.3	30259.3	17471.2	34029.9	32688.2	29663.1	18625.7	34994.6	32247.6	16530.5	29806.3	16940.9	23979.9	34449.2	19885.9	52100.5	16077.3	14457.4	16579.1	30585.6	14369.8	22605.4	20564.1	30619.6	51833.9	14532.7	17023.9	28152.5	9818.29	43142.3	42090.2	51796.2	83827.1	32030.7	14869	22587.8	49346.7	27419.7	7956.27	43657	110568
3099	negative	NA	NA	2-Decarboxybetanin;Polyoxin B	-20.673296999689;12.028120562789	MS1 mz matched	547.164	301.339	53273.5	64904.3	71162.4	77005.7	74288.7	89984.7	91306.6	102190	115572	116020	114424	103557	35501.9	58244.4	90738.7	105933	73458.3	89105.7	94221.1	63480.6	102770	66292.2	47212.2	125765	77922.2	60924.9	106985	100720	53986.8	80861.4	16999.1	87238.1	76535.8	36153.7	103228	85422.4	99630.5	136120	123756	108224	84364.1
1009	negative	Heptadecanoic acid	0.9914	NA	NA	MS2 forward	269.247	39.062	52999.4	47010.3	28347.7	55630.6	52481.3	48703.4	50097.5	29271.8	53294	43827.8	26308.4	66620.4	46194.8	23500.4	36002.2	84829.7	104755	26893	102195	46508.1	49732	91601.3	60608.4	36892.7	45777.3	31879.9	21583.3	46154.6	48246.7	57348.1	83869	69296.7	56152.4	46289.4	31452.4	60714.7	32495.1	75014.7	15691.9	32114	37769.9
403	negative	Citrate	0.9868	NA	NA	MS2 forward	191.02	514.71	20836.2	19986.7	26807.3	15629.5	15730.2	13812.7	13636.2	24347	18660.7	16500.1	13159.8	24460.1	14164.8	19386.9	15927.2	11851	12807.6	10672.9	12279	22720.6	15308.3	26380.2	13283.9	21101.9	14334.3	13666.7	15504.4	12739	14677.4	5297.29	9546.58	13204.3	28903.7	19757	16289.2	12648	16802.3	11962	18616	9518.14	25213
3285	negative	Naringin	0.7931	NA	NA	MS2 forward	579.163	29.2805	5850.57	4448.55	6663.87	3942.5	3713.65	2932.43	3438.34	4713.16	3896.54	5134.18	3830.44	6467.91	1613.9	4355.2	4690.95	4111.12	10087.6	2982.09	2412.17	4974.2	1197.63	1214.41	3438.85	2456.55	2366.65	5888.96	3884.07	1872.65	1911.66	4660.07	2040.45	3089.59	4815.06	13318.8	2050.96	2804.55	16290.8	1556.78	3128.82	5833.07	2825.49
1775	negative	NA	NA	Caffeoyl C1-glucuronide;Caffeic acid 4-O-glucuronide;Caffeic acid 3-O-glucuronide;5-Amino-6-(5'-phospho-D-ribitylamino)uracil;5-Amino-2,6-dioxy-4-(5'-phospho-D-ribitylamino)pyrimidine;5-Amino-6-(5-phospho-D-ribitylamino)uracil	5.01917651913748;5.01917651913748;5.01917651913748;7.95875455976234	MS1 mz matched	355.076	368.148	5010.9	3930.05	3236.44	3154.72	3257.43	2349.3	3299.93	2993.79	2305.28	2643.18	2451.57	3365.13	3485.17	4504.37	3124.82	2403.32	4103.85	4073.36	2288.51	5991.5	2652.78	3725.93	4550.12	2881.99	2164.72	5658.35	4685.82	3741.65	2575.99	2842.94	3151.28	3963.5	3712.73	4348.47	5285.89	2957.59	1414.54	2846.37	3848.3	2420.05	2054.52
4232	negative	NA	NA	PG(18:0/20:3(5Z,8Z,11Z));PG(18:0/20:3(8Z,11Z,14Z));	-3.01003026242831;-3.01003026242831;	MS1 mz matched	799.554	40.323	267606	198338	161857	297344	346898	185328	268795	216767	258132	228804	156091	251033	136561	337619	124855	245534	347254	286103	160916	301757	192505	172684	369748	181997	213351	198980	181707	246673	97923.9	166825	185275	143020	179556	224036	199616	527971	304712	215388	252894	235955	183832
3535	negative	NA	NA	NA	NA	Unmapped	628.763	315.417	995.639	1304.18	1943.54	2042.81	2140.33	2130.94	2367.51	1882.62	2668.09	2367.55	2644.32	2161.27	2016.12	1241.36	1450.21	2044.33	1477.91	3305.45	2487.11	1080.3	2541.1	1876.42	2102.35	3336.73	2333.86	1331.5	2126.99	2151.74	2050.45	2383.31	2797.38	2012.64	1519.31	1944.27	2368.79	2178.64	2269.31	2427.25	2076.08	1451.72	2718.56
2447	negative	NA	NA	Ribostamycin;Vistamycin;Xylostasin;3''-Amino-3''-deoxygentamicin A2;3''-Demethyl-gentamicin A	0.193515363959052;0.193515363959052;0.193515363959052	MS1 mz matched	453.228	53.413	108124	43292.9	75537.4	55020.9	67210	67018.2	47598.8	66272	69883.3	70607.1	66944.9	107023	18369.1	25436.7	364900	87008.5	87717.8	23745.8	51270.3	48643	57685.8	47496.2	47376.1	43040.2	39151.7	52642.6	28614	93727.8	56503	18965.5	45791.8	21168.9	78280.8	45636.8	22782.6	48058	19042.4	23859.6	87384.3	126332	135114
2688	negative	NA	NA	Macrocarpal I;Hemibrevetoxin B	9.63403410341122;9.53959988423918	MS1 mz matched	489.298	24.036	22476.6	24590.5	17408.5	12558.4	13809.3	11386.8	18798.4	24047.7	15731.2	16884.2	21683.3	12349.4	12131.9	19914.8	19614.2	11457.3	7695.92	26445.5	12077.1	14184.8	13440.2	17643.3	9452	18755.8	7926.28	9524.01	10582.1	8154.35	4452.11	16171.3	10618.3	16238.4	22018	5300.48	8885.13	19777.4	19330.6	21424.5	14767.7	22784.7	18507
4905	negative	NA	NA	NA	NA	Unmapped	1027.63	188.51	10958.6	19561.6	10826.3	22226.1	11769.8	16783.3	10799.4	15231.9	16928	17864	14340.9	12041.8	67248.9	7325.18	8090.08	9560.99	23992.3	5666.62	11524.6	12317.3	9253.4	24223.4	24329.2	11481	29442.5	16190.1	9927.53	3316.62	4447.19	40192.6	21466.3	17460.3	19235.4	37319.8	7086.44	13365.3	32828	25124.2	6907.15	12131.9	25923
1126	negative	Oleic acid	0.9997	NA	NA	MS2 forward	281.247	39.681	5030184	4702814	2209203	5279158	5127650	5102748	4827858	4878326	3023976	2704688	4342254	6849478	1602308	3921195	3161681	6352307	3037405	2062232	5791286	5721280	3596550	3720888	3031987	4147914	3050200	2298921	2324663	4078867	4656808	2876263	6314126	1301143	2514316	4690431	5341579	1874321	2530074	5326135	590086	6789326	6455697
3350	negative	NA	NA	Cyanidin 3-(6''-dioxalylglucoside);	-15.2566811098604;	MS1 mz matched	592.069	284.106	875.732	1623.99	1866.67	1981.98	2471.04	2621.05	2890.73	2348.75	2538.41	2373.49	2343.21	2090.17	2367.67	1915.19	3571.45	4210.87	1390.36	2372.61	1765.67	256.635	4024.99	3008.02	1870.35	1340.66	3650.41	976.28	1889.9	3110.91	6302.31	2848.22	2811.65	3402.11	630.956	1354.06	1111.89	1836.07	5334.81	5170.14	2429.49	1442.95	1416.77
2150	negative	NA	NA	NA	NA	Unmapped	410.983	349.697	131581	149309	173833	190350	225181	220909	258180	242630	286633	303293	287838	206990	198512	143794	198598	282761	188075	272608	278490	138050	277706	211009	211092	264642	296540	144141	235183	247202	264174	251839	244901	231239	166004	185209	189847	256294	285209	285131	203548	302939	257075
103	negative	ketoisocaproic acid	0.8591	NA	NA	MS2 forward	129.057	54.622	2887452	1529298	1471545	1481526	1452668	1468209	1482659	1523193	1556334	1512253	1511881	2261763	912305	2275423	1077498	1421674	1562373	1279009	2205455	1052943	1174777	862203	1232749	1191088	879568	1154644	1235951	1067497	784355	1522555	671811	1554717	1434162	1840903	1063509	1927132	2210113	2561092	847867	1264761	761986
3064	negative	NA	NA	1-O-Hexadecyl-lyso-sn-glycero-3-phosphocholine;1-O-Hexadecyl-2-lyso-sn-glycero-3-phosphocholine	7.89441	MS1 mz matched	540.361	193.041	3223.31	4429.07	4843.82	4308.52	5295.92	4863.25	5656.03	7355.51	7804.98	4158.95	5444.67	4628.07	10253.6	1357.79	6279.4	3243.98	6266.25	5551.41	8045.87	4570.16	7037.7	3004.89	6101.37	6382.22	11735.9	3045.2	2502.05	2089.08	2563.69	9680.02	5607.79	4662.47	5564.97	6220.45	2371.23	7510.49	8846.75	13447	1915.87	5803.61	7582.3
1846	negative	Nervonic acid	0.9796	NA	NA	MS2 forward	365.339	39.0555	24025.4	19662.9	9639.15	23151.3	22910.7	12242.7	23141.3	21676.7	22439.8	22431	14122.4	30998	15535.2	32024.2	11005.4	19157.5	43384	8269.61	22233.1	21157.5	20443.8	19891.1	21636.5	25870.7	19467.8	33928.2	10799.5	14681.7	8296.86	32518.3	28696.7	17251.6	21817.7	28666.3	24963.5	25049.2	18471.9	25290.8	10287.6	14384.7	27807.1
1250	negative	O-Acetyl-L-serine	0.8998	NA	NA	MS2 reverse	293.092	366.976	4850.35	3811.74	3336.69	3055.1	2896.55	2849.59	2611.27	2731.13	2448.47	2135.21	2234.86	2077.78	4722.06	3557.51	2958.85	2365.59	3598.31	3336.47	3223.26	4497.64	2783.76	5534.02	3460.56	3724.85	1456.5	5329.56	5163.46	3385.17	2144.73	3030.38	4399.27	3016.5	4528.78	4497.59	4065.29	2105.78	4081.35	2882.09	3029.89	1900.18	3939.57
3778	negative	NA	NA	NA	NA	Unmapped	687.539	175.082	319124	317450	332170	285702	270273	410288	305876	306064	302625	591212	345215	321502	273585	563742	340521	330272	309377	244836	246182	402944	325403	378512	285381	300054	246251	379230	293011	341648	275575	555568	269688	267668	452958	385173	264414	410032	276472	259361	266054	354753	313637
1662	negative	NA	NA	Olsalazine;	6.6172797025187;	MS1 mz matched	337.203	27.356	10423.3	17443.9	10755.1	9734.97	10307.4	7754.3	14130.3	14332.1	12417.7	17159.9	9662.39	16773.3	29837.1	27554.4	14509.9	35876.6	12250.9	46813.2	28863.3	17659.8	43358.4	36474.9	51767.5	40235.3	14102.2	29580.5	30894.1	9858.22	14002.1	31847.4	17963.9	32018.1	19638.4	19730.8	11675.6	10557.6	13759.1	16752.8	5629.85	24460.9	25514.1
3324	negative	NA	NA	Avermectin B2b aglycone	-16.6541	MS1 mz matched	587.32	33.849	6425.03	9922.86	6387.18	11514.2	7334.89	7827.75	5566.7	6814.03	9131.14	5699.97	5602.98	13915.9	5141.89	5186.94	4745.25	4878.86	18525.7	9322.57	8347.39	7365.17	5183.75	3155.71	5681.63	11839.7	12640.8	19176.8	12595.8	12332.9	5227.33	2859.1	4658.13	5338.91	12099.7	2467.78	2839.37	4135.3	4312.03	8672.32	6213.98	11986.6	10117.6
4648	negative	NA	NA	NA	NA	Unmapped	899.592	154.283	69724.2	61867.9	73917.9	50090.2	46261.6	48455.3	38961.8	41178.2	37700.7	38207	40795.9	42927.5	63619.4	65512.7	66946.9	48746.5	54119.7	37540.6	32876.2	26995.2	47335.3	67034.1	38417.3	40619.6	33765.1	39580.4	49139.9	53451	66804.6	54213.6	36744.1	61651.9	45455.7	64991.9	37199.7	46644.9	61061.1	46586.9	40794.7	32919.4	59747
2324	negative	NA	NA	NA	NA	Unmapped	436.28	175.674	35970.2	30654.3	42930	28418.5	36581.3	21184.8	24376.7	19475.9	35565.6	19840.1	32818.8	17852.7	108457	53937.3	50267.5	13377.4	34590.4	60009.8	22663	28541.9	34942.7	21271	31622.7	51130.2	53185.2	28885.5	14407.6	18359.1	28238.8	59405.3	97609.8	19375.5	54128.5	64703	15008.3	8773.1	30086	36938.1	15153.7	9926.83	42559.6
4339	negative	NA	NA	PG(18:0/22:5(4Z,7Z,10Z,13Z,16Z));PG(18:0/22:5(7Z,10Z,13Z,16Z,19Z));PG(18:1(11Z)/22:4(7Z,10Z,13Z,16Z));PG(18:1(9Z)/22:4(7Z,10Z,13Z,16Z));	-3.78858102329955;-3.78858102329955;-3.78858102329955;-3.78858102329955;	MS1 mz matched	823.554	107.77	122250	96231.1	186399	87137.2	105262	134782	111030	123058	128815	118076	192550	97998.8	83616.4	117884	160436	178456	128251	141325	161250	77899.3	97154.8	120210	100692	70760.7	106120	63437.9	119708	143052	105368	185421	80189.6	95742	119502	112093	83661.3	219728	149398	110329	113035	103945	161324
2899	negative	NA	NA	NA	NA	Unmapped	516.946	354.786	5257.44	6493.8	7706.77	10694.1	8439.27	9598.91	11492.8	11097.6	11190	13009.2	13181.4	8842.48	8091.52	6272.13	9876.28	19451.8	7572.18	13574.9	12657.4	6035.75	13212.2	7142.78	12385.2	10983.2	14449.9	5375.58	9546.49	6860.46	10478.9	9134.9	9256.47	10547.4	8047.83	7524.7	8351.03	10697.3	12399.6	10515.7	7637.2	12537.5	10716
1156	negative	Stearic acid	0.9997	NA	NA	MS2 forward	283.262	39.051	804157	1105303	645852	1275087	1211856	773333	1185659	1238020	1243074	695801	700500	1388873	484315	981207	948146	1602616	1754713	443013	1535139	1207354	653338	1330301	1420415	750607	1053942	891319	943005	585052	429342	1487469	1261033	650788	1094336	1387915	935542	602602	678398	1885716	227172	1360988	1149291
2403	negative	NA	NA	NA	NA	Unmapped	448.842	315.332	1576.95	2918.54	3404.73	4332.29	4601.69	4639.64	4556.32	4805.39	5067.09	5137.31	4914.5	4153.96	4377.52	2424.82	3083.12	4928.56	2763.14	7240.25	5323.39	2012.72	5392.98	3310.81	4427.62	6228.83	5096.69	2173.98	4373.54	4739.23	4713.47	4978.41	6316.79	4306.51	3009.96	3225.9	4399.42	4339.4	5107.15	5258.05	4316.76	3209.81	5325.32
1516	negative	NA	NA	Samandarone	-19.128	MS1 mz matched	319.226	37.717	33707.2	30071.5	39754.5	35879.6	56656.8	46236.2	24226.5	34465.5	33392.9	51667.9	29083.3	30815.5	116860	167298	22720.8	105835	42052	82064.7	59169.2	35442.8	40906.4	42335	95323.7	63792.6	57066.3	23414.1	42961.2	48925	201940	73215.8	140817	32040.7	154105	27315.3	35790	22439.3	22664.5	218962	12775.4	510372	77020.7
2395	negative	NA	NA	(-)-Epiafzelechin 3-gallate;	-11.4922876196413;	MS1 mz matched	447.344	78.385	261551	239782	300159	320849	455976	280870	236945	452336	240217	263222	263891	349560	252164	156156	420204	214836	286807	496752	349906	174880	316436	242857	261870	266864	146980	143134	157208	201260	257796	180946	173456	136430	323822	311403	381436	266480	373840	318823	232574	237535	318370
3969	negative	NA	NA	NA	NA	Unmapped	735.515	159.114	107174	197118	211909	198827	308018	188771	196190	191457	125265	183241	179069	263300	223959	200820	332348	247435	261230	162091	257634	190356	226894	236436	330983	266906	108295	138945	224429	214873	364438	277223	243066	187397	205177	356291	209481	225694	193766	101398	228989	167273	221522
3036	negative	NA	NA	NA	NA	Unmapped	537.411	155.375	205553	176959	215915	198976	314604	177476	309749	185000	176354	152976	159658	264107	91918.4	189902	355039	143257	427178	129836	206271	98029.3	170773	307302	213559	284215	178181	423379	68863.4	190044	208922	198052	59367.5	94278.6	174983	204729	121938	100783	465927	214594	327493	136858	592449
4992	negative	NA	NA	Melilotin;	-16.2479446024637;	MS1 mz matched	1073.57	190.206	2845.22	5057.26	5267.72	6458.99	6579.64	4470.1	8197.39	6603.61	6429.11	7519.46	8528.93	11289	4970.12	1925.48	2723.1	1721.54	2418.11	2198.39	1475.32	1394.32	1861.44	3351.3	1596.81	1897.85	63971.9	3447.16	2618.46	1058.65	1324.64	1974.58	2715.48	1576.24	3329.92	2620.65	2676.36	3004.97	6521.66	4036.33	1275.7	92547.9	6678.73
1179	negative	NA	NA	Tenofovir;L-Octanoylcarnitine	2.72028739706291;11.7729310674428	MS1 mz matched	286.213	48.766	46365	28211.7	46557.7	55538.1	44619.9	27889.5	28737.4	35877.7	52475.9	31723.2	57136.8	39864.9	64338.8	35968.9	60331	83436.5	63863.2	54618.6	44964	31102	68622.6	72549.7	20855.1	40581	49823	52430.1	22184.5	61698.2	41836.9	66946.2	44382.4	44896.6	30027.1	58226.9	41868	45498.3	70773.5	35638.5	9516.05	63129.6	87476.3
2598	negative	NA	NA	LysoPE(0:0/18:1(9Z));LysoPE(18:1(11Z)/0:0);LysoPE(0:0/18:1(11Z));LysoPE(18:1(9Z)/0:0);Delcorine	-24.1253313326121;-24.1253313326121;-24.1253313326121;-24.1253313326121;2.76660206394759	MS1 mz matched	478.29	182.249	62551.7	80214.1	77641.2	70991.7	111350	114691	113621	112139	112118	61825.4	56106.6	63262.5	189713	117943	92565.9	74734.2	47376.9	85805.9	121064	109394	101312	47242	128462	111877	143038	131166	124157	30737.6	34173.1	76580.9	64507.5	129947	88946.3	123466	119126	117106	123208	106832	23890	24646.1	72658.3
1943	negative	NA	NA	1-(alpha-Methyl-4-(2-methylpropyl)benzeneacetate)-beta-D-Glucopyranuronic acid;Cyclocalopin B;Ibuprofen glucuronide;4,8-Diacetyl-T2-tetrol;7alpha,8alpha-Dihydroxycalonectrin;Furathiocarb	-7.24246376980066;-7.24246376980066;-7.24246376980066;-7.24246376980066;-7.24246376980066;9.94357804482162	MS1 mz matched	381.152	167.393	246769	269310	163530	149934	273381	262571	262232	147192	113515	236382	247150	140611	10460.6	12155.1	747581	407836	68501.2	8723.49	8997.69	106686	404357	9305.86	8153.79	335899	307141	45407.1	44900.8	312501	13186.2	22749.4	330606	14554.7	9316.54	460966	244926	346791	9591.39	9778.47	56680.8	1166639	15576.3
4644	negative	Glycodeoxycholic acid	0.9941	NA	NA	MS2 forward	897.614	200.33	4857.63	16042.6	19334.5	22891.1	22502.8	22174.7	22089.7	19970.5	17754.7	17107.8	22221.8	7334.96	1373.45	1915.05	44136.8	28941.1	62880.5	137.652	1738.84	23282.4	3849.25	3508.68	228.283	452.39	5390.28	867.294	40792.6	606.078	515.001	201.618	124	2834.72	12475.3	677.468	875.328	967.788	55.6948	15154.3	289.63	187077	378.904
2904	negative	NA	NA	Ganoderiol C;13-beta-D-Glucosyloxydocosanoate	-22.8558366419324;6.51334469814472	MS1 mz matched	517.385	106.059	175021	223741	252613	174370	129008	223364	124430	136830	183874	124162	110538	261318	55448.5	78845.2	451519	137998	123410	392845	147324	225233	198436	104254	202085	207419	147576	106086	76985.1	109110	357166	87127.6	91681.2	90129.8	135519	206570	252625	102178	195313	109139	130791	114335	459579
3135	negative	NA	NA	Pateamine;Pateamine A	-14.5864	MS1 mz matched	554.297	176.43	412643	466509	296776	276460	281200	267037	217603	231215	435787	248344	247939	236348	611545	267158	222042	194705	228091	338595	296707	221203	362247	280786	319572	260922	188129	453510	316774	115374	144954	425271	130885	226814	362090	427901	286456	356242	603206	317238	99366.7	249636	263026
1359	negative	Arachidonic Acid (peroxide free)	0.9855	NA	NA	MS2 forward	303.231	39.04	148729	261005	242443	169906	152192	283437	151915	299428	266732	151432	273793	389322	144017	183082	184318	225688	217044	254396	326201	133559	260835	263780	357500	166990	239054	119509	173570	157568	91768	279688	439919	215836	294353	366410	195005	236769	238770	367627	110378	215814	460881
686	negative	NA	NA	NA	NA	Unmapped	230.039	376.148	55464.5	39698.3	35102.2	45897.8	45170.6	27326.4	48617.9	26909.9	43354.5	24232.4	24622.7	24240.9	41466.4	28625.2	38142.1	23529.8	43545.6	24665.5	31599.3	34760.4	46827.4	50759.7	46029.3	33519.1	28870	54119	35632.4	46115.6	19936.7	51996.7	57346	23994.3	44749.2	49570.9	43747.6	19272.3	40985.3	25890.2	25385.4	29006.3	32866.6
3882	negative	NA	NA	AS 1-5;	-11.7173507037273;	MS1 mz matched	715.032	349.093	1999984	1950653	1751270	1596146	1497316	1327066	1240467	1033984	1017724	941946	900091	1426983	1875183	1957614	1414199	1114084	1877979	1196109	991138	2254557	1098762	1746940	1680920	1196321	1017411	2135069	1577756	1502391	1443441	1295206	1542990	1348220	2003636	1880557	1787618	1235314	1186078	924975	1387762	871780	1190987
2504	negative	NA	NA	Trihydroxycoprostanoic acid;2-Deoxybrassinolide;Castasterone;7-Oxateasterone;(22R,23R,24S)-3beta,22,23-Trihydroxy-7-oxa-5alpha-ergostane-6-one;7-Oxatyphasterol;(22R,23R,24S)-3alpha,22,23-Trihydroxy-7-oxa-5alpha-ergostane-6-one	-6.83665081585729;-6.83665081585729;-6.89135053671247;-6.89135053671247;-6.89135053671247	MS1 mz matched	463.339	105.791	140901	156360	281004	152011	122251	132919	185189	142714	159714	110228	142295	200151	82220.3	64993.1	357560	86494.4	151881	104642	207264	85457.3	138026	197632	126294	108455	136997	123591	94504.7	251989	172646	72659.4	97311	73635.8	162616	119815	161310	207284	539174	93115	118800	122479	159200
1446	negative	Arachidic acid	0.8368	NA	NA	MS2 forward	311.293	38.388	21389.1	18430.6	18661.2	32527.5	15187.2	32754.1	29868.7	18254.5	33855.3	20478.5	20345.2	31170.7	15985.8	29849.6	21540.5	20599.2	53808.6	20268.5	42156.1	30435.6	14550.1	25845.8	33697.2	19453.4	28441.6	20510.4	21719.6	8564.23	15745.7	47701.7	38517.7	68583	19914.1	36497.4	22811.5	32769.8	9980.51	42016.7	6774.43	35459.6	28190.5
2612	negative	NA	NA	LysoPE(18:0/0:0);LysoPE(0:0/18:0);LysoPC(15:0);	-7.97686614245629;-7.97686614245629;-7.97686614245629;	MS1 mz matched	480.305	180.147	374336	436970	677255	677751	371701	359300	632472	618143	580820	323306	348167	611374	1720160	322290	575008	553970	784749	282800	398320	557398	621475	775979	581187	377330	1462712	946957	279651	192150	336342	988366	1083894	446386	458140	771443	268054	324921	573865	582959	206658	331199	856406
1750	negative	NA	NA	Coriandrone D;Palmatine;5,6-Dihydro-2,3,9,10-tetramethoxydibenzo[a,g]quinolizinium	24.6120851259578;16.953618989829	MS1 mz matched	351.161	33.773	18402.7	34822.8	38887.9	18403.6	20758.2	35606	23140.2	22774.3	36135.3	21420.4	23237.8	24356.1	9817.25	13463.3	49580.1	27728.1	48175.8	24888.9	6640.22	20551	9257.96	8445.24	11624	23021.9	20509.7	87029.5	25626.4	40735.3	36570.2	4325.16	24810.1	12943.8	23350.4	56384.1	11354.3	12843.3	91010.4	12053.6	32013.6	19609	28869.8
2252	negative	NA	NA	IDP;Furcatin	-24.1724447255908;17.1654504000142	MS1 mz matched	427.175	185.23	14889.6	18005.3	12680.4	8710.81	9832.46	9792.63	8945.03	16280.8	9708.08	15543.9	7894.24	5655.95	1360.37	1186.16	32303.6	6472.28	7446.47	15864.6	1141.48	3934.64	33841	3666.4	865.525	11484.3	13061.4	5872.3	7493.84	50547.2	7977.36	5050.12	7942.08	2742.86	15362.1	5152.39	1926.1	4076.46	11340.4	3113.43	48399.1	4647.23	75554.4
47	negative	Creatinine	0.8381	NA	NA	MS2 forward	112.053	170.358	7411.5	7049.16	7871.31	4970.02	3641.66	7368.09	4060.68	5707.84	2702.48	6210.95	6721.55	8062.43	2721.09	6620.93	3805.08	5275.13	8331.75	3285.83	6626.74	7902.97	5728.27	2843.28	8519.85	6439.19	5950.5	4985.18	5190.6	6883	9550.15	6173.36	5541.9	8632.24	4176.66	11205.8	7353.61	5100.21	20354.6	6457.55	6040.26	6651.29	6759.57
1065	negative	NA	NA	Fenthion;Fenthion;MPP;4-Methylmercapto-3-methylphenyl dimethyl thiophosphate	9.7043370423577;9.78418818789598	MS1 mz matched	277.023	224.878	33314.7	22601	19534.4	17319.1	18375.5	14868.1	15614.3	15199.4	17421.4	14182.4	14732.4	12713.1	20111	23717.4	13572.3	11572.1	19902.4	14158.8	15614.8	31080	11986.8	15109.5	19671.7	11370.6	14331.5	36168.6	13179.2	15414.6	14849.5	15590.5	15847.6	13585.9	24004.5	25650.8	14996.2	14700.7	15706.9	13947.5	17047.6	12977.6	12961.1
3853	negative	NA	NA	NA	NA	Unmapped	709.499	160.766	114464	145896	144486	147338	131187	127724	146205	21284.2	119325	123929	100036	149852	222950	125760	219090	86786.7	86023.6	199836	133878	105393	13587.1	142192	100458	281011	142773	44716.1	265094	120089	239787	156873	266629	177432	367824	140623	221987	199333	4663.09	31818.1	184953	81817.2	224316
326	negative	Theophylline	0.9967	NA	NA	MS2 forward	179.057	63.824	27606.2	27690.5	14902.6	27250.6	27599.6	28543	15161	29071.2	14152.4	12628.9	27430.6	45257.5	7277.69	5771.77	14791.9	5463.11	110321	6430.86	47520.1	4380.85	4820.36	6424.11	6739.88	4699.36	8455.09	3833.82	5775.2	6141.31	7959.03	5147.68	9940.48	3769.13	6167.29	30033.1	4832.91	14624	14624	4551.81	3642.43	6036.41	8614.76
2794	negative	NA	NA	Thiamine triphosphate;	21.4061516661788;	MS1 mz matched	504.305	178.812	108302	70305.2	76076.4	111851	106379	60693.6	111452	54647.8	97820.8	49448.8	58319	56596.4	141010	69737.7	51882.8	20621.3	33754.1	77354.8	59018.1	90271.4	45645	62366.9	80692.9	49687.6	98448.6	115707	80265.7	44066.8	11128	93418.9	49034	48380.7	81843.6	101836	117566	143544	112545	70385.7	20223	18229.2	64050.6
159	negative	Glyceric acid	0.6167	NA	NA	MS2 forward	142.976	315.162	5028.83	4760.56	4282.17	3290.24	2402.4	2974.54	3196.97	2404.93	2431.91	2371	2593.12	2342.75	4125.82	5828.56	2264.13	2462.61	3462.9	3579.09	2051.67	4354.35	2646.38	3304.36	4709.74	3924.13	1923.74	5198.11	3411.89	2820.85	2714.62	1799.2	3470.2	1430.62	5772.51	4883.25	4616.05	2295.8	2722.96	1348.54	2281.48	1533.57	3479.95
192	negative	Vanillin	0.7251	NA	NA	MS2 forward	151.04	28.1865	18695.5	31902.9	30030.2	16415.8	14960	16560.1	27014.1	17905.3	17503.4	13257	24804.1	32175.9	2292.26	14801	20299.2	6636.25	2391.5	70857.6	2631.26	1455.5	33770.6	2197.84	8168.67	22174.4	6616.3	8100.88	36296.7	14930	155566	3798.22	7359.12	4070.43	2476.13	1765.32	6107.11	1968.17	1414.62	3165.93	27923.9	6639.28	32987.2
4452	negative	NA	NA	NA	NA	Unmapped	847.633	168.975	30400.7	63089	38879.9	34372.6	44951.3	59600.1	32373.4	32530.2	31953.5	28516.3	30246.1	31095.7	23160	31572.1	23127.5	19231.7	51481.1	25101.7	18694.1	41516.1	17474	45252.4	39014.6	34319.6	34283.3	54569.8	24728.5	37792	13887.3	33182.2	28424.7	24451.6	44061.7	32277.8	23900.2	37944.9	30877.9	22396.9	24431.2	33969.7	53546.3
3891	negative	NA	NA	PE(18:1(11Z)/16:0);PE(16:0/18:1(11Z));PE(14:0/20:1(11Z));PE(14:1(9Z)/20:0);PC(16:1(9Z)/15:0);PE(20:1(11Z)/14:0);PE(16:0/18:1(9Z));PE(20:0/14:1(9Z));PE(16:1(9Z)/18:0);PC(15:0/16:1(9Z));PE(18:0/16:1(9Z));PE(18:1(9Z)/16:0);1-Hexadecanoyl-2-(9Z-octadecenoyl)-sn-glycero-3-phosphoethanolamine	-16.7853408920491;-16.7853408920491;-16.7853408920491;-16.7853408920491;-16.7853408920491;-16.7853408920491;-16.7853408920491;-16.7853408920491;-16.7853408920491;-16.7853408920491;-16.7853408920491;-16.7853408920491;-16.8481942729235	MS1 mz matched	716.519	145.34	53175.4	30437.2	25217.5	35547.2	25246.9	23472.9	24392.1	24967.1	36973.7	23980	22153.8	18535.4	33998.9	21006.7	29199.8	22428.3	27043.6	26110.6	20678.6	43422.5	38905.6	35595.4	21534.2	53685.1	52013.9	35142.5	24334.7	45412	29845.2	69591.1	24996.4	32919.9	31289.7	25370.9	20574.8	52511.7	44728.3	16596.7	28045.5	33813.7	21443.9
2136	negative	NA	NA	NA	NA	Unmapped	408.908	314.942	27829.1	28662.5	31045.1	23057.1	22666.2	16558.8	17789.2	17518.5	16877.5	11907.9	11444.8	16520.2	43715.5	28774.7	9872.13	14348.8	19728.4	31440.6	13934.5	22202.5	14881.1	19948.5	35725.4	29243.5	13631.1	28892.8	28069.1	18944.2	17871.8	16702.2	46898.3	17255.5	29065.9	29528.5	38335.9	13055.4	17625.3	15246	14097.1	6534.66	23730.9
3775	negative	NA	NA	NA	NA	Unmapped	686.805	315.199	11268.9	10809.9	12547.9	8030.12	8603.32	6739.8	7019.36	5773.39	6053.49	5842.12	4604.66	5911.9	18639.4	12464.4	3893.16	5505.65	7677.86	11854.2	5736.86	9616.39	6466.11	7011.57	16056.4	12240.7	5094.81	10931.8	10880.2	7442.08	5988.44	6544.33	19437.1	6428.75	11162.2	11183.4	14395.7	5135.15	7222.1	5286.75	5727.4	2592.71	9428.31
404	negative	NA	NA	Serinyl-Serine;	-11.6579690879127;	MS1 mz matched	191.072	368.26	26627.3	20633.6	16024.9	18000.3	15498.5	13547.7	13401.3	12329.1	10156.2	9928.76	11043.6	15402.8	17359.8	23435.4	17125.4	8085.98	20963.3	24849.8	11171.3	29503	11802.6	21461.6	23652.5	11249.4	8522.44	32178.1	25317.1	18747.8	11056.3	13082.7	13667	24440.5	16142.9	19724.6	28463.5	13042.5	4575.6	14381.1	16526.4	10753.7	9512.56
5	positive	1-Aminocyclopropanecarboxylic acid	1	NA	NA	MS2 reverse	84.0446	367.181	3521.3	2481.29	2814.52	2018.36	1636.47	1781.64	2236.6	2329.47	3792.52	3090.61	3368.57	2569.1	3568.49	2071.81	376.162	1130.32	2131.4	2902.5	4226.74	1698.92	2648.24	4730.14	3016.8	2840.74	1784.72	2417.13	3184.18	1997.43	1355.3	3245.64	4072.45	2545.71	2584.78	2922.01	2526.46	1884.51	4247.17	3423	2893.63	1669.3	3420.89
8	positive	L-Alanine	0.9986	NA	NA	MS2 forward	90.0551	342.391	3362.71	2599.99	1915.36	1993.93	2692.63	2129.7	2756.1	2891.77	3557.13	2669.78	3169.8	2389.82	5835.6	3979.89	2959.97	2404.52	4393.02	3161.32	3801.57	1911.07	2028.82	4102.34	4530.56	4242.25	3820.46	2940.21	3533.46	1997.38	3721.47	2765.57	2600.12	2231.24	5715.22	2811.9	2289.56	3054.31	3454.77	5349.8	2364.93	3408.3	1852.57
13	positive	D-alpha-aminobutyric acid	0.9799	NA	NA	MS2 reverse	104.07	298.005	1191.55	1030.5	1150.67	900.543	1348.3	1446.48	1274.29	1023.01	1258.85	1127.73	864.895	1114.27	1938.77	1019.59	1906.38	911.159	989.772	1446.43	1355.16	663.159	900.285	1734.79	2005.08	980.869	545.013	1376.01	1176.82	1041.54	590.549	708.169	1435.76	785.941	1639.94	1234.07	1496.32	1659.44	738.787	1268.24	593.871	941.602	1164.42
14	positive	Choline	0.6104	NA	NA	MS2 forward	104.107	273.353	115396	104580	104124	98993.6	105434	93769.3	104102	106057	99475.3	101984	107197	79540.4	128257	112770	123788	78164.2	71422.9	125214	75782.2	98291.9	98839.6	75168.8	101885	85911.5	117402	130784	107635	121063	115770	82659.3	148461	88901.8	93182.4	98351.2	103768	87438.3	81593.5	86516.2	103953	95707.6	114515
23	positive	Creatinine	0.9908	NA	NA	MS2 forward	114.066	171.562	43302.6	20365.7	42661.7	37285.4	36823.7	32588.9	32333.7	30613.6	29799.8	36521.9	39951	37162.8	39184.4	28739.6	37399.4	29378	37555.4	46045.7	31210	36827.6	29837	34860.7	79619.1	24187.5	30295.2	24899.7	33140.9	31737.5	97361	34027	56460.7	34718.6	20725.4	41596.9	30213.3	29223	71633.7	22375	28481.3	22520.7	31481.9
26	positive	D-Proline	0.9995	NA	NA	MS2 forward	116.07	309.145	80200.1	69968.2	76459	67658.5	65539.2	70598.1	55239.7	72220.8	64655.3	68030.9	56672.8	45968.9	97986.5	62883.2	31530.5	32967.2	69122.1	91550.6	71443	70275.2	70257	62401	60961.7	98497.2	53421.4	86569.6	56028.7	67962.2	40892.7	66427.6	77593	78598.8	89149.2	59622.5	74902.8	64861.4	111147	83149.6	57782.2	34433.1	74465
30	positive	Betaine	0.9999	NA	NA	MS2 forward	118.086	270.632	140572	142141	140021	135662	146998	149187	154747	159617	155108	146640	161830	147507	131976	144202	131214	171975	131027	149964	179375	153644	139998	189072	144718	120399	117347	148813	170394	113307	152657	115275	122164	139328	185277	135238	134531	134830	141744	139122	108410	134841	158678
35	positive	Acetoacetic acid	0.6604	NA	NA	MS2 reverse	120.065	336.786	1015.24	1247.4	1193.13	1372.88	995.647	1616.48	960.526	1344.94	1062.92	1202.85	1355.87	530.075	2582.78	697.979	775.545	833.269	649.758	1093.55	1049.77	536.617	416.891	1323.43	1052.44	1954.22	535.285	932.326	1621.17	409.676	1503	818.9	728.139	885.813	2083.76	651.869	1353.74	495.673	2521.92	1136.44	551.555	531.035	1238.81
36	positive	Tyramine	0.9018	NA	NA	MS2 forward	120.08	252.752	46107.8	41068.5	41021.7	39273.3	40071	36845.5	39151	37487.2	34758.7	35353.7	31027.8	42933.7	37962.8	32173	36910	36879	49440.6	47000.6	39832.6	39003.1	28566	24653.9	37032.5	29885.4	53410.8	36297.4	26152.3	40016.8	76015.4	33875.9	41515.2	39036	27012.8	34434.3	40093.2	45497	30488.8	43703.6	31951.5	28678.7	36046.5
41	positive	Nicotinamide	0.9972	NA	NA	MS2 forward	123.054	68.417	4214.52	3967.08	4830.24	3182.43	4828.14	4349.65	4398.06	3692.38	3301.52	4033.06	4083.72	662.833	14566.7	2857.84	4234.37	811.079	824.398	15497.9	1599.18	837.112	3119.43	3172.34	1608.1	614.292	5582.91	871.172	2329.9	2009.5	6210.15	1496.16	16734.3	525.66	6540.59	2490.03	3364.68	935.559	3862.06	3568.68	666.928	139.34	7527.74
44	positive	Taurine	0.8672	NA	NA	MS2 forward	126.021	292.062	33428.3	30004.9	24747.8	29228.2	22456.8	19528.5	20716.2	25361.5	30188.9	18521.1	25851.2	13956.1	37923.9	36211	28587.8	18085.3	15322.2	34835.5	17070.4	13947.7	18624.9	20576.5	26237.7	21140.5	27143.2	27335.7	22851.6	28371.8	37992.8	30618.1	52961.8	16175.6	32081.8	29552.2	22307.9	30414.5	33049.8	20081.2	13169.4	13031.4	27511.8
50	positive	NA	NA	NA	NA	Unmapped	128.953	352.446	183039	182814	160526	154392	164265	159054	143208	166790	148415	152887	147587	155345	176193	157082	159490	158351	180697	185455	173815	161963	171141	160366	165388	164130	166204	169115	167336	149692	161124	165660	150616	165637	158867	164378	147864	156564	176443	170846	157340	160400	164585
53	positive	Imidazole	0.9983	NA	NA	MS2 reverse	129.065	334.966	645.356	427.12	560.286	836.684	369.397	883.026	854.36	813.665	490.102	520.56	662.056	663.581	620.493	700.673	433.765	366.253	445.026	451.88	448.156	611.289	356.348	1093.6	331.352	906.551	424.749	474.821	522.035	432.151	465.795	1327.08	489.398	426.674	336.576	1094.72	387.457	503.111	11145.6	468.129	410.05	434.658	452.362
66	positive	Creatine	0.9928	NA	NA	MS2 forward	132.076	342.476	138965	116340	121043	111577	129651	136912	126397	146151	156258	154775	213221	151818	280320	152213	174461	335731	234071	145339	231601	152965	95575.3	227150	243621	220664	219091	201189	182043	67228.7	171934	140986	126712	78630.6	288393	184873	77573.7	206201	148690	313669	92020.7	189506	67980.7
68	positive	L-Leucine	0.978	NA	NA	MS2 forward	132.101	259.654	29149.2	24912.4	27135.3	27087.8	26138	31314.3	23942.4	25103.7	25450.3	25234.5	23231.4	24185.8	30388.7	27752.2	14589.8	22600.4	20129.6	23947.8	28536.1	18182.9	20656.8	21341.1	26832.1	21310.9	29032.5	25738	21004.6	17812.7	23472.8	20972.2	33153.4	24794.2	23997.7	24149.3	33693.8	30615.2	30175.2	49119.8	13160.5	17466.2	27149.2
74	positive	2-Phenylglycine	0.6281	NA	NA	MS2 reverse	134.059	28.5475	772.885	1098.93	877.955	496.315	1003.82	722.471	562.137	742.327	1015.53	574.463	586.467	711.9	476.892	500.252	105.685	305.478	1511.94	38.5675	569.427	2422.92	83.09	429.153	281.738	112.378	722.931	22.1237	872.043	27.0976	96.4248	658.79	219.284	227.867	327.33	1010.3	212.974	1415.61	5752.24	177.551	0	219.94	1044.35
78	positive	Dopamine	0.7924	NA	NA	MS2 forward	136.075	296.258	4970.64	4048.31	4154.8	3707.91	3532.51	3343.38	3419.22	3141.46	3677.62	4067.36	3504.31	3197.84	7711.82	3292.1	2359.95	2341.35	2489.96	4433.48	4234.43	3635.54	3399.41	3821.57	5599.01	4536.95	3462.72	3055.74	4573.59	2903.85	2683.32	3591.58	5461.44	5285.78	5206.33	3781.99	4233.19	4586.3	5320.56	8746.97	3120.69	2192.02	4539.66
80	positive	Hypoxanthine	0.9967	NA	NA	MS2 forward	137.045	171.062	25817.8	27212	25641.6	23552.5	23035.8	18996.7	22682.6	28247.6	27791	23191.1	29072.8	14059.3	46152.2	21650	10820.8	16173.6	18587	94519.5	28631.6	9306.68	11477.5	30406.6	132621	9407.18	18319.6	27295.9	23015.1	20427.9	84218.2	21375	97939.3	11804.7	40779.8	12337.3	17774	11973.1	9266.87	20642	11369.5	8593.06	24018.6
84	positive	Anthranilic acid (Vitamin L1)	0.8918	NA	NA	MS2 reverse	138.054	284.137	2796.54	1846.24	1609.17	1578.63	3231.17	1940.98	2703.88	1959.48	2577.23	2084.7	1936.88	377.697	3354.75	764.148	3385.75	308.74	2036.2	826.41	2854.32	2219.83	381.742	3111.82	11581.8	684.188	578.966	549.073	588.636	319.249	435.34	889.756	1793.64	657.511	290.396	4771.23	1276.46	1198.4	4013.36	2165.4	298.535	456.178	814.842
95	positive	NA	NA	NA	NA	Unmapped	144.101	270.476	24290.5	22761.2	24234.6	22611.2	24935.7	26605.1	25316.6	27136.1	25938.4	25064.3	25788.2	16036.2	19593.8	6307.34	7002.34	2879.58	2866.57	4681.22	14152.2	4048.41	13491.2	18697.8	2206.9	3361.5	8290.46	869.25	2332.46	4298.86	18194.2	20238.5	3898.48	11445.4	1695	80610.4	9686.08	4437.95	75606.4	10533.8	2032.88	2666.07	2737.77
106	positive	Acetylcholine	0.9418	NA	NA	MS2 forward	146.117	372.601	38248.8	29298.8	32633.8	33195.4	36997.2	36147.9	30207.5	34876.6	40859	36075	38804	21014.1	45471.3	35623.3	28762.2	33065.7	37278.2	24144.6	40506.5	27801.5	21072.9	31015.1	47539.9	48136.3	39226.4	42968.8	21537.9	31453.6	54872.4	29210.9	36922.1	31798.9	29792.2	43439.8	38441	37464.9	75738.7	56208.6	34281	16057.6	25188.5
109	positive	L-Glutamine	0.9986	NA	NA	MS2 forward	147.076	366.937	43742.4	38189.8	39153.7	32863.9	32822.3	44759.4	29463.5	35615.3	42433.4	38023.4	42080.3	34501.1	50462.7	28508.4	29147.4	31323.1	28499.4	44049.4	46269.5	30877.2	36440	66268	41336.1	43019.9	23264.8	44810	43079.8	33925.5	20448.5	46099	49035.8	37276.3	37707.6	38859.6	31963.4	31068.7	62984.4	41734.9	40630.8	25811.8	51987.6
116	positive	L-Glutamate	0.9989	NA	NA	MS2 forward	148.06	389.478	5610.69	4838.53	4367.8	4559.36	5397.44	3903	4744.62	4593.4	4370.73	4411.03	4021.02	3633.62	13500.3	4343.38	2195.89	2682.06	4873.06	7818.66	4450.14	3051.71	4779.58	6387.33	8106.04	4823.21	7540.12	3942.16	6000.45	5701.87	3828.47	4745.48	12044.2	3304.08	8304.06	7308.03	3789.51	3162.44	4966.61	6240.44	3695.06	4105.47	5477.03
123	positive	L-Methionine	0.97	NA	NA	MS2 forward	150.057	279.979	5263.47	3631.1	3922.45	3727.19	4678.05	3748.32	4195.97	4522.22	4018.68	3403.41	3620.23	2182.95	6693.03	4143.35	2529.97	3816.5	2950.25	8641.69	5315	3834.93	2873.71	4250.22	3794.41	5174.86	3415.44	4849.73	2433.06	3377.22	3461.53	3468.77	10181.4	3249.53	3954.44	4661.05	3904.59	3954	5638.86	5216.99	2872.06	2220.71	7395.79
125	positive	Triethanolamine	0.9016	NA	NA	MS2 forward	150.111	290.36	1604.48	1484.99	1243.23	1098.12	1143.37	1105.19	1029.27	1159.04	1450.15	1118.3	1045.32	942.584	667.857	1190.42	3474.41	1810.97	641.03	1626.9	1575.29	1012.39	901.136	1222.62	3907.46	4098.21	1000.71	1590.81	1143.04	1032.73	1290.33	1806.69	911.495	915.563	907.478	988.685	1283.88	1147.44	3858.67	1132.27	845.973	1285.86	1079.67
130	positive	1,3-Benzenediol	0.6039	NA	NA	MS2 forward	152.07	299.492	790.042	801.63	887.696	791.538	1005.1	907.7	878.078	830.208	830.633	608.938	827.447	1354.15	168.381	823.488	374.299	169.368	131.189	2443.22	345.75	676.824	2084.91	129.223	2212.34	130.075	1128.09	165.878	135.963	1780.2	3316.19	303.76	162.375	301.747	129.017	165.992	1830.7	2493.79	140.025	137.852	2021.44	4637.28	313.466
134	positive	NA	NA	Mesalazine;3-Aminosalicylic acid;3-Hydroxyanthranilic acid;Aminosalicylic Acid;2-Nitro-p-cresol;6-Methoxy-pyridine-3-carboxylic acid;3-Hydroxyanthranilate;3-Hydroxyanthranilic acid;3-Hydroxy-2-methylpyridine-5-carboxylate;4-Aminosalicylate;4-Aminosalicylic acid;(5R)-Carbapen-2-em-3-carboxylate;1-Carbapen-2-em-3-carboxylic acid;(5R)-Carbapenem-3-carboxylic acid;(5R)-Carbapenem-3-carboxylate;(5R)-7…	-11.8855223775591;-11.8855223775591;-11.8855223775591;-11.8855223775591;-11.8855223775591;-11.8855223775591;-11.9306073276198;-11.9306073276198;-11.9306073276198;-11.9306073276198;-11.9306073276198;-11.9306073276198;-11.9306073276198;-11.9306073276198;-11	MS1 mz matched	154.041	235.673	293066	277983	251313	244915	267597	245006	259300	257250	244185	235410	239856	251832	250589	253460	268560	272558	267295	257028	296044	271887	250173	228577	244060	257983	283806	278473	269442	233616	286099	251882	256788	290298	291793	278968	271304	261327	277942	258427	282692	246407	254663
135	positive	NA	NA	Mesalazine;3-Aminosalicylic acid;3-Hydroxyanthranilic acid;Aminosalicylic Acid;2-Nitro-p-cresol;6-Methoxy-pyridine-3-carboxylic acid;3-Hydroxyanthranilate;3-Hydroxyanthranilic acid;3-Hydroxy-2-methylpyridine-5-carboxylate;4-Aminosalicylate;4-Aminosalicylic acid;(5R)-Carbapen-2-em-3-carboxylate;1-Carbapen-2-em-3-carboxylic acid;(5R)-Carbapenem-3-carboxylic acid;(5R)-Carbapenem-3-carboxylate;(5R)-7…	-11.8231542692749;-11.8231542692749;-11.8231542692749;-11.8231542692749;-11.8231542692749;-11.8231542692749;-11.8682392221475;-11.8682392221475;-11.8682392221475;-11.8682392221475;-11.8682392221475;-11.8682392221475;-11.8682392221475;-11.8682392221475;-11	MS1 mz matched	154.041	250.349	175671	189554	176236	179841	187680	183706	184101	189336	171863	164360	179172	196011	186916	194085	208146	193647	175431	195309	195694	192431	157292	179957	180222	204971	187048	176136	196192	168514	202907	199184	210091	201862	208732	214107	192637	174875	186365	179097	191662	146253	192196
156	positive	NA	NA	NA	NA	Unmapped	160.096	291.178	10150.7	9033.74	7098.45	9499.42	8186.57	6622.33	7266.86	8138.31	9227.5	6032.17	8957.86	2707.51	4055.34	548.855	1531.96	1877.67	3214.75	295.037	6316.34	595.659	603.06	13470.4	1308.26	1549.79	1736.92	538.699	609.028	379.411	344.887	1818.4	1278.85	1793.18	543.718	14704.9	362.019	1447.76	16629.8	1551.5	273.634	210.061	357.209
158	positive	Cyclohexylamine	0.6807	NA	NA	MS2 forward	160.132	379.985	70855	64772.6	83262.6	68669.3	71391.9	66704.4	66354.4	71375.5	75049.5	70611.7	67560.5	34743.7	106404	17199.2	122088	108776	45554.5	54443	46435.3	41054.8	13543	53991.3	29551.7	110425	83317.1	179759	71262.2	16378.1	127324	84384.7	80049.7	85370.4	91574.5	25793.4	81767.5	32920.3	46122.2	55859.2	22394.5	43813.3	62913.6
166	positive	L-Carnitine	0.9757	NA	NA	MS2 forward	162.111	317.849	13335.2	11049.8	11932.3	12092.4	11833.6	12725.9	10716.5	11354.5	11452.9	12768	10930.1	6224.21	14389.8	15593	15785.5	4482.35	3555.43	4814.92	6803.12	12547	18396.9	33183.1	2691.23	6456.88	4592.91	6770.26	1194.23	44356.4	1463.92	19687.4	4181.73	26911.1	58246.1	26139.4	4107.09	3985.48	29480.8	42184.4	21781.4	4288.53	13163.2
176	positive	trans-2-Hydroxycinnamic acid	0.6705	NA	NA	MS2 forward	165.054	296.326	9023.68	7297.68	8781.23	7966.29	7335.91	6461.2	6322.09	6433.37	7455.37	6481.54	5859.8	5363.6	14205.5	5948.14	4120.76	4852.25	4941.11	7911.78	8433.64	7023.18	6406.42	6314.27	9503.17	7765.22	7161.31	6893.4	8600.32	5116.72	5627.21	7080.1	9549.12	10028.3	10641.4	7537.9	8827.86	7934	9317.98	17427.4	6210.54	4483.49	8930.88
180	positive	L-Phenylalanine	0.9978	NA	NA	MS2 forward	166.085	252.751	110706	101206	95292.9	96552.5	90851.8	89450.3	88469.6	83220.7	83603.3	81184	75383.5	100500	87807.1	77952.4	96605	82202.5	118178	111802	92459.9	93013.9	69250.2	57404.2	89826	71281.6	122168	88219.7	68165.5	93849.9	177705	77456.5	99811.7	93741	63017.3	85049.6	94654.6	108814	72011.3	112395	72632.2	70480.2	83030.8
181	positive	Ephedrine	0.8476	NA	NA	MS2 forward	166.122	197.608	1278.8	1570.8	1628.46	1223.46	1082.18	1586.09	1824.92	1399.5	1434.37	1844.04	1496.17	1038.14	1328.65	697.259	1664.48	895.666	485.624	1432.82	693.156	789.418	1304.87	830.361	10814.5	1728.1	1018.25	13968.5	1026.92	1220.78	2384.64	566.571	1490.14	900.152	1086.49	1052.72	477.3	637.75	390.541	472.472	1826.48	4691.17	1598.11
186	positive	NA	NA	Selenocysteine;5-Nitro-ortho-anisidine;2-Methoxy-5-nitroaniline	5.95060993737788;-14.8762150150169	MS1 mz matched	169.057	366.885	9687.06	7982.86	7585.19	6842.38	6526.1	8393.85	4967.55	6590.9	7109.19	5377.99	7300.72	5886.24	9425.49	6569.89	4630.87	5782.47	5452.35	8276.84	8429.18	5596.96	7946.04	11009.6	6436.62	8510.03	4768.41	7727.13	7265.35	7661.72	5094.5	10338.6	11663.8	7404.32	8939.72	6830.88	5224.55	6044.66	13339.5	7781.32	5488.76	5096.34	10019.5
207	positive	L-Arginine	0.9996	NA	NA	MS2 forward	175.118	528.11	10465.8	7440.14	11414	10389.4	6782.95	11024.6	8212.61	12467.7	5885.59	13954.4	13446.5	12203.4	21471.7	6481.48	6168.87	3186.01	5360.9	14278.4	8670.85	9395.89	4189.96	13332.1	10490.4	7101.48	5479.21	8371.25	15368.3	18384.2	9454.7	7788.79	27105.8	9254.47	7564.14	9692.15	14010.7	13874.8	9063.85	4109.26	10921.6	5583.18	11591.4
208	positive	L-Citrulline	0.9907	NA	NA	MS2 forward	176.102	384.504	4842.91	3555.18	4167.76	4693.52	3790.52	3896.45	4546.62	4659.72	4017.9	3111.47	3664.49	3572.94	8480.2	3416.95	3431.75	3466.09	4290.91	4586.32	5261.36	3484.25	3794.28	5770.4	4844.78	4359.9	3819.52	3091.94	4912.54	3613.39	2581.69	5247.44	4853.5	5073.37	3947.65	5893.01	3801.49	3237.43	7216.11	4834.25	1937.48	2851.2	5703.01
215	positive	Indole	0.7742	NA	NA	MS2 reverse	178.085	276.366	1418.43	1431.28	1535.69	1844.35	1558.06	1787.73	1751.38	1570.2	1923.1	1942.17	1823.74	1448.99	1511	682.1	3624.11	5097.16	1192.18	779.614	1322.49	1605.23	610.761	1423.69	691.39	1593.12	803.629	2342.48	410.9	596.535	1788.87	2353.57	897.822	1307.2	1673.88	896.336	908.118	1067.72	732.592	1090.47	629.53	1552.04	1304.4
222	positive	Methylephedrine	0.8107	NA	NA	MS2 forward	180.137	148.091	1838.6	2251.42	1644.24	2077.05	2043.09	1860.27	1846.26	1037.61	1640.44	1656.2	1911.28	0	0	0	2898.8	0	183.63	48604.3	0	0	200.869	0	0	25319.2	0	0	0	0	0	0	588.68	0	0	0	0	0	0	0	0	0	0
224	positive	L-Tyrosine	0.9888	NA	NA	MS2 forward	182.08	296.192	26966.1	22285.8	24079.1	21378.3	19962.8	16807.8	19028.5	16086.1	19906.6	19613.7	17431.8	15380.4	38379.1	17132.4	11905.3	14334.4	13379.6	23811.3	22624.4	20889.4	16541.2	19772.8	25433	21266	18022.2	18950.8	22524.5	14673.5	13858.7	19377.4	30504.3	27214.4	30396.8	21560.6	24568.5	23492.3	27883.9	50173.4	17100.6	11839.9	23151.4
225	positive	Pargyline	0.7581	NA	NA	MS2 forward	182.091	334.796	1124.84	1218.6	1159.69	1496.86	1131.69	1616.56	1139.79	1474.04	962.248	681.566	863.125	3225.64	833.685	1268.18	1375.2	1192.85	1304	723.67	1157.75	859.015	1212.19	902.169	849.815	1762.09	2170.86	545.126	994.373	1607.93	1377.06	670.149	893.592	1022.03	1255.62	1300.92	1120.93	553.947	1839.19	1724.79	296.397	6363.22	706.607
230	positive	NA	NA	Epinephrine;Ginkgotoxin;Methylnoradrenaline;Levonordefrin;Normetanephrine;L-Adreline;(R)-(-)-Adreline;(R)-(-)-Epinephrine;(R)-(-)-Epiremine;(R)-(-)-Adnephrine;4-[(1R)-1-Hydroxy-2-(methylamino)ethyl]-1,2-benzenediol;L-Normetanephrine;Levonordefrin;alpha-Methylnoradreline;Nordephrine;alpha-Methylnorepinephrine;alpha-Methylnoradreline	20.590649236748;20.590649236748;20.590649236748;20.590649236748;20.590649236748;20.8271504647859;20.8271504647859;20.8271504647859;20.8271504647859	MS1 mz matched	184.093	350.587	21994.6	18923.1	17965.8	16888.8	16182.4	14891.3	15103.4	18054.7	16837.2	14533.5	14491.2	9658.74	25214.3	10869.9	13104.9	14678.8	19439.6	18974.1	24695.3	16987	19658.9	24811.3	15045.8	17506.9	15919.9	19922.5	20274.5	13407.2	13980.6	17138.5	12903.3	18144.1	18789.3	22610.6	15792.9	15511.9	26732.5	28411.4	13985.8	10784	7859.59
236	positive	NA	NA	NA	NA	Unmapped	186.111	333.695	8598.27	7816.39	7415.43	10053.9	11365.2	10518.3	11997.5	11728.1	7956.35	8929.83	9153.89	12491.2	8818.38	10358.6	13051.9	41687.2	3384.68	2423.13	7269.53	5593.56	4708.7	4963.6	4983.27	15221.2	16987.1	22420.1	7654	5438.64	10012.6	14352.1	10602.8	8813.61	7234.64	5472.47	5500.42	4849.32	3568.97	13089.9	3901.93	10558.8	3968.57
238	positive	NA	NA	NA	NA	Unmapped	186.994	352.443	411899	396222	357688	319417	330847	320216	281442	291592	277330	276004	254236	262527	311144	307347	259182	321843	311340	374005	351806	326323	330089	299555	302249	357319	355622	316186	268073	258700	402279	371384	290997	394724	279605	298351	275412	361754	380247	333782	267655	293739	379596
242	positive	Indolelactic acid	0.7292	NA	NA	MS2 forward	188.07	254.171	56996	51357.3	42627.1	46913.4	43373.4	42483.1	44785.7	44417.8	43225	41993.2	39086.9	40572.1	46923.1	61178.5	27250	28844.3	39007.8	47668.7	63618.4	22841.4	42811.8	37336.3	70748	40802.2	48188	56924.2	63131.3	19584.2	35647.6	61210.2	40349.5	98732.3	63495.4	39694.6	63156.9	64191.8	92620.3	119961	14201.6	22378.9	35657.7
251	positive	Trimethylamine N-oxide	0.9857	NA	NA	MS2 reverse	189.101	49.4285	8183.02	8974.57	9025.78	7580.46	6933.04	6957.94	10399.5	5201.87	8619.26	7646.39	6180.34	0	186.327	0	118.306	0	444.251	194.083	471653	300.919	159.812	296.225	334.938	0	0	289.19	0	82.451	176.055	538.099	159.456	99.2969	0	5667.23	68.9216	279.894	287.262	528.14	0	207.991	700.776
259	positive	5-Hydroxyindoleacetate	0.9749	NA	NA	MS2 reverse	192.064	257.158	5361.23	4398.69	4608.42	4729.78	4889	4849.56	5145.06	4799.47	3944.68	5044.65	3763.82	4127.03	3336.24	5134.48	5760.41	3172.18	3915.29	7990.89	3134	2986.03	6676.07	2573.87	3329.2	3310.75	7794.83	4519.69	6019.26	4637.84	7504.66	3461.31	3106.76	5620.89	4272.31	4949.76	5102.39	3992.53	2792.33	2791.68	4272.87	3263.84	5470.43
267	positive	Nicotinuric acid	0.7953	NA	NA	MS2 forward	198.084	385.35	8495.95	5857.05	6131.35	6470.53	6144.84	5812.67	6403.81	6337.31	6410.51	5904.88	5599.24	5949.17	11781.3	4636.98	5565.01	5139.73	6316.73	7259.08	7519.42	4758.89	6059.13	7509.54	7190.99	5835.98	6546.25	4030.39	8884.28	6800.54	4483.22	6927.01	8684.99	7209.31	7376.67	7394.45	6716.43	5204.97	8785.78	6538.09	4092.98	3997.02	8669.03
268	positive	D-Mannose	0.8924	NA	NA	MS2 reverse	198.096	296.409	10299	10078.6	10033.1	11095	10153.1	8382.28	3664.19	7404.87	8990.61	8278.47	7511.79	9710.17	4803.39	11612.5	9438.24	6650.88	8833.64	8094.35	6728.42	11330.4	9376.73	8763.57	6048.65	11923.9	1850.77	8847.11	13320.7	13422.4	4703.1	8938.82	2000.52	9618	12351.3	5021.62	12813.3	11128.2	10845.7	13867.8	18433.2	8960.95	6527.62
274	positive	p-CHLOROPHENYLALANINE	0.9685	NA	NA	MS2 forward	200.046	249.975	839655	812132	784779	799815	801788	835402	839322	831208	879024	842938	902492	889315	930623	897392	910619	831265	809221	834526	928206	842135	861625	829511	832591	877758	836234	861985	927774	790363	903904	873782	1006901	904645	930477	928412	963756	814161	825598	835475	914020	666160	852319
279	positive	Cysteine-S-sulfate	0.9885	NA	NA	MS2 reverse	201.983	299.167	2640.15	2569.1	1348.42	2199.89	2011.97	1712.4	2137.16	1743.39	1776.29	1767.68	1683.68	1234.68	1012.51	1511.17	3257.07	1982.08	2600.19	2272.6	1890.4	2679.28	3635.5	2626.94	1870.63	3025.82	1396.78	2665.68	2085.93	1799.51	2794.68	3056.13	2976.35	3391.96	1371.02	2369.32	1981.8	2181.38	1481.45	1362.83	3447.8	1459.56	2268.85
280	positive	3-Hydroxybenzoate	0.9444	NA	NA	MS2 reverse	202.043	235.666	386745	396135	348466	357036	362248	330438	375965	353864	342249	340259	350616	354918	363267	366333	365913	382087	374500	376781	384849	331195	345751	305723	331011	374108	406088	380107	379891	329429	394576	360745	341820	402419	396090	371418	370808	343301	408602	373072	380619	364326	375490
284	positive	N6-Methyl-L-lysine	0.9943	NA	NA	MS2 reverse	202.154	271.416	3455.41	3485.99	4410.87	3736.55	2888.06	2821.31	2931.37	2814.62	2655.02	3208.95	2264.02	2297.38	3184.74	2037.5	2158.27	1627.9	2211.89	5083	2954.76	2710.72	1184.36	3962.97	2891.45	4106.12	1953.3	3182.3	2991.6	1408.04	3003.36	3210.74	2546.95	2819.05	1672.84	3709.16	2079.79	3469.95	5976.38	3137.69	1593.31	1840.02	4724.65
290	positive	Leucyl-Alanine	0.7251	NA	NA	MS2 reverse	203.138	338.94	1249.81	1386.26	1331.58	1303.57	1465.43	1579.89	1781.55	1536.16	1811.74	1429.3	1770.63	1090.83	1643.29	1514.97	3759.14	1284.82	1496.99	1413.73	1620.02	1106.08	1857	1227.3	1122.78	1242.41	1748.33	1185.25	1521.76	2600.88	5264.02	1298.06	2024.88	873.021	1245.95	1335.09	1158.97	1139.67	907.601	1037.84	2137.92	1384.63	1256.17
291	positive	NG,NG-dimethyl-L-arginine(ADMA)	0.9731	NA	NA	MS2 forward	203.149	480.974	21427.3	23464.2	21584.8	20562.7	22648	21697.1	24517.9	22677.7	21385.1	25516.2	25064	20364.9	31264	21870.9	17580.8	14483.8	23638.3	30876.7	20096.8	20922.7	14945.2	26378.2	23836.7	23668.7	21803	24761.5	28858.5	30433.1	29742.5	20998	34101.1	24185.3	19586.8	27759.4	20437.8	19763.6	26314.9	23167	36722.6	20809	26894.5
294	positive	Acetylcarnitine	0.9956	NA	NA	MS2 forward	204.123	302.166	859383	901610	1270478	816079	882684	945512	934186	1103523	1053117	840240	959887	905047	550671	760932	1052715	1264736	565958	649550	887899	520643	1034654	1137588	583413	775923	1160919	838524	764556	616128	1272350	838114	987332	576318	807979	886414	1135101	893324	611502	1006001	455512	758176	948292
297	positive	NA	NA	NA	NA	Unmapped	205.067	296.791	7609.1	7235.74	7555.68	6675.59	7823.57	6628.92	5914.04	6220.81	7318.02	7067.24	6941.35	27413.3	19375	2932.12	32140.7	4327.48	21309.2	8561.77	34693.8	10295.8	8968.78	30452.3	1468.64	29762.5	43532.9	1340.66	2663.82	1868.03	40462	2272.16	7720.68	1593.68	32374.3	22889.3	28740.3	18590.3	29026.9	5100.64	51027.5	10465.2	3020.28
298	positive	L-Tryptophan	0.9871	NA	NA	MS2 forward	205.096	254.167	56173.2	50926.6	45771.2	44854.6	44437.6	42815.1	41814.4	41679.7	43350.4	41338	36958.4	37079.3	42324.6	60787.6	27567.7	26614.7	41666.8	43800	60990.4	23431.9	41998.5	33360.9	67993.8	34397.1	45394	53236.5	58353.3	18274.6	32376.7	61286.6	40307	92352.5	59199.8	39662	59307	60694.9	88137.2	106199	12130.9	18741.3	33078.9
311	positive	L-Kynurenine	0.9884	NA	NA	MS2 forward	209.091	257.146	10144	8067.25	8103.02	9425.86	8311.48	8505.85	8761.57	7893.07	8093.74	8475.46	7770.88	7531.04	6865.97	8613.03	11708	5781.27	6549.65	14365.4	6842.43	6281.59	13160.1	4790.29	6919.51	6566.98	14263.5	7225.77	10617.2	9382.16	14700.2	5784.22	5561.95	10646.2	6970.31	9210.23	9656.87	7143.38	5968.64	5495.3	8444.41	6370.04	10635.8
333	positive	NA	NA	NA	NA	Unmapped	216.17	271.556	7374.17	8296.78	9765.29	8915.97	6714.44	8639.08	9028.45	9515.1	10483	12201.5	9595.6	10034.4	13426.3	9344.9	8335.63	4731.22	6738.04	13171.5	10190.4	9423.57	3693.22	12641.5	10800.6	10243.8	4837.61	12617.9	14749	8734.19	7989.22	5889.72	12720.4	7360.36	6779.5	7665.56	10029.9	8066.78	11748	10872.9	8212.82	6942.58	10055.4
335	positive	N-a-Acetyl-L-arginine	0.8127	NA	NA	MS2 forward	217.128	363.678	2139.8	1808.29	1897.55	1840.45	2106.3	2148.3	2088.82	1919.51	2154.41	2158.44	2051.15	1497.21	4755.38	1285.99	1937.58	1013.21	1532.36	2268.31	2098.26	1479.14	1915.1	3505.95	2189.25	2122.88	1328.03	2179.88	2003.02	1510.43	1574.25	1935.69	2276.79	2474.15	2774.34	2636.86	1521.8	1747.46	3608.7	4318.81	1480.62	1332.9	1921.15
340	positive	NA	NA	Alanyl-Lysine;Lysyl-Alanine;Gamma-glutamyl-L-putrescine;beta-Alanyl-L-lysine;beta-Alanyl-L-lysine;gamma-L-Glutamylputrescine	-22.3206390762476;-22.3206390762476;-22.3206390762476;-22.3206390762476;-22.1295246947196;-22.1295246947196	MS1 mz matched	218.138	277.187	43587	47312.6	45737.3	52282.2	56485.7	54086.1	59118.9	57542.8	58890.4	58617.4	60655.7	28559.8	59951.6	62544	38925.6	56130.7	86510.4	33333.3	100200	36322.4	44306.6	61776.5	58854.3	40462.5	43618.7	66560	57161.6	36952.8	36033.3	57123.5	13952.8	76160.9	43337.9	67817.4	70389.2	59761.1	83419.4	97750.9	41747	23098.7	20634.7
341	positive	Dodecanoic acid	0.6855	NA	NA	MS2 reverse	218.21	92.1955	13336.3	13040.9	17221.8	15884.6	13886.9	12867.7	14070	8449.93	12430.8	8822.16	7928.98	3169.8	3720.87	5214.45	28205.7	17548.8	12273.7	34046.3	42418.1	37513.4	14091	9732.58	12526.6	9230.17	12621.2	9799.88	3353.83	6077.47	10428.5	14581	6669.51	12669.1	8546.94	10150.4	21929.2	8602.15	17430.3	13090	7019.97	6125.45	19281.8
346	positive	Pantothenate	0.7639	NA	NA	MS2 reverse	220.117	265.137	3728.21	3616.16	3254.89	3674.42	4909.79	4831.07	5027.59	4727.39	4966.48	4483.13	4912.77	4699.9	5682.76	2259.53	7224.91	3658.68	1983.97	4969.82	2252.99	2474.81	3999	1757.8	2377.61	2710.84	4515.73	4380.09	5949.25	8424.2	6286.48	1753.38	8347.73	3427.07	5006.32	2908.99	5167.25	2972.28	1728.3	3974.92	5309.84	2552.24	5816.31
350	positive	NA	NA	L-beta-aspartyl-L-serine ;Aspartyl-Serine;Serinyl-Aspartate;2-trans,6-trans-Farnesal;trans,trans-Farnesal;Farnesal;(2E,6E)-3,7,11-Trimethyl-2,6,10-dodecatriel;(2E,6E)-Farnesal;alpha-Santalol;beta-Santalol;4-n-Nonylphenol;4-Nonylphenol;p-Nonylphenol;Butylhydroxytoluene;BHT;2,6-Di-t-butyl-4-methylphenol;2,6-Di-tert-butyl-p-cresol;Butylated hydroxytoluene;2,6-Bis(1,1-dimethylethyl)-4-methylphenol;Ca…	23.4722623489918;23.4722623489918;23.4722623489918;11.2094307318271;11.2094307318271;11.2094307318271;11.2094307318271;11.2094307318271;11.2094307318271;11.2094307318271;11.2094307318271;11.2094307318271;11.2094307318271;11.2094307318271;11.2094307318271;11.2094307318271;11.2094307318271;11.2094307318271;11.2094307318271;11.2094307318271;11.2094307318271	MS1 mz matched	221.185	272.132	82383.3	88075.3	79407.6	68997.9	80762.8	69418.6	69458.6	70312.8	66583.5	73213	65848.3	44208.6	92399.1	82569.5	70060.6	62596	35860	111878	74512.8	59489.4	54579.3	53852.2	64361.2	46622.2	65663.9	131144	83859.8	45749.1	84840.8	38514	98907.8	54194	80020.6	46615	74574.8	61876.7	60218.2	74218.6	37989.3	58597.3	86428.8
352	positive	N-Acetyl-D-glucosamine	0.7498	NA	NA	MS2 reverse	222.096	254.362	4481.89	4663.83	4651.81	4709.07	4944.14	4389.47	5050.6	4953.36	3848.89	4389.69	4515.55	3013.36	6026.65	3695.91	5205.66	4001.76	3504.36	6108.78	3744.81	3983.23	5896.27	3712.82	4001.77	3025.05	5755.08	6151.73	2991.09	4314.04	6994.64	3872.17	6148.47	4299.57	2504.45	4196.77	6126.03	4881.07	2724.97	4506.63	4752.09	2304.02	5008.11
363	positive	NA	NA	Tetranorbiotin	2.12737	MS1 mz matched	226.987	352.447	203019	192828	175976	179615	186344	175156	151348	168293	162133	169868	145536	153660	182577	176312	166878	179522	172641	186232	204151	205197	191503	180250	167599	197786	192454	176984	170153	163511	196591	182271	159856	181878	169208	181621	161739	196814	197888	188980	161190	176813	197645
367	positive	Histidinyl-Alanine	0.7123	NA	NA	MS2 forward	227.113	339.277	565.992	702.349	886.901	1028.95	1074.56	1263.67	1108	1020.58	1068.62	999.716	1218.47	687.24	1668.11	1663.84	1061.67	641.151	1102.35	2358.04	791.84	1261.23	607.999	690.986	2672.61	796.458	1124.92	998.741	1933.85	1132.47	1411.17	1269.8	3111.56	316.316	1379.82	1151.3	788.892	718.332	917.904	1571.2	1001.74	545.234	1109.23
382	positive	NA	NA	(S)-Menthone 8-thioacetate;Mansonone C;3,8-Dimethyl-5-isopropyl-1,2-phthalenedione;Bisphenol A;2,2-Bis(4-Hydroxyphenyl)propane;1,1-Bis(4-hydroxyphenyl)propane;Lindenenone	-3.90593469732585;11.0014002761325;11.0014002761325;11.0014002761325;11.0014002761325	MS1 mz matched	229.118	417.912	54837.6	39733.7	34763.9	41989.6	36124.4	37369.1	31655.8	39172.7	33298.6	34581.4	33121.4	52447.9	35094.2	27271.8	31754.1	27409.3	25921.3	66534.3	20196	22670.8	89244.4	28880.5	22270	40130.8	28901.4	35449.6	42479.1	63546.1	60599.1	37840.1	37679.9	46502.1	36531.8	54499.8	32474.4	32335.8	20116.9	28635.8	79470.8	24774.6	80433.2
385	positive	NA	NA	NA	NA	Unmapped	229.154	298.56	83650.1	64174.3	73773.4	67347.2	73548.8	66554.7	61433.7	61929.9	66367.2	60037.7	56645.8	49946	33632.2	65967.3	82405.8	204667	72048	23323.7	142426	53885.5	28124.7	48075.4	47010.3	39984.9	72968	59351.3	27045.1	64964.2	98542.9	100748	49771.1	32459.4	21246.5	80983.2	39448.2	40014.7	114424	61549.9	36294.8	60295.2	42499.6
386	positive	NA	NA	NA	NA	Unmapped	229.154	363.906	52138.5	45861.4	45392.6	47143.9	51849.5	53918.6	50303.8	48419.1	54973.2	48398.2	51852.2	40421.2	22093	49753.9	64083	125387	56516.8	20042.7	94091.3	36519.4	24312.7	33904.4	35124.6	29268.5	60253.3	45335.8	22893	44928.9	66446.9	65209.8	34019.3	22709.2	17094.5	53967	36101	27305.6	68327.8	58383.9	27059.6	49030	32445.2
388	positive	7-Methylxanthine	0.9804	NA	NA	MS2 reverse	230.069	270.503	8475.1	4500.93	7320.94	7098.64	7445.73	4271.98	3973.02	7346.58	3768.15	4286.83	6868.14	3326.01	4668.98	8421.72	2373.83	4147.56	5568.41	4054.78	7901.14	3034.35	2539.95	6197.64	4064.03	6920.04	7775.12	3918.13	5982.71	2727.5	5772.75	3941.71	4679.41	7343.8	5023.11	5110.64	5033.45	4673.4	5351.12	11278.3	3958.99	2772.6	4099.32
390	positive	Ergothioneine	0.9437	NA	NA	MS2 forward	230.095	323.454	4156.44	3526.33	3695.11	4129.94	4295.35	4211.01	4501.29	4365.61	3775.53	3766.97	3939.6	7901.23	2750.91	3717.42	2359.34	4749.61	4707.96	610.639	2770.46	4173.15	1370.96	12331.4	14220.8	436.505	1393.3	531.566	613.716	3757.33	880.524	5303.42	374.049	5894.06	3665.65	10291.9	1986.09	4397.83	3034.86	15227.6	7447.49	2947.48	1330.65
397	positive	NA	NA	NA	NA	Unmapped	230.247	146.977	49129.9	38687.3	43514.5	38367.2	38745.3	31466.1	36660.5	30063.6	37282.4	28004.5	34325.1	47243	45089	59894.6	54417.8	57362.2	50829.4	78731.2	56162.5	60333.9	49123.7	64434.5	79002.5	70703.7	71161.1	57082.6	54828.7	49009.8	81034	86708.6	48830.2	70838.1	51354	48303	58853.4	79473.2	90072.9	86170.8	80005.4	80535	90054.4
409	positive	NA	NA	Benzeneacetamide-4-O-sulphate;Paracetamol sulfate;	-4.94805338040361;-4.94805338040361;	MS1 mz matched	232.026	33.531	63520.3	65381.7	58626.3	62899.4	64255.4	58272.6	57089	57918.9	56711.5	55523.6	52816	191840	56.4237	35362.6	38646.6	1779.19	184.532	108297	9968.32	23087	184605	129.286	61928.1	0	95051.5	1268.13	449.68	68116	333683	3176.29	921.939	1705.48	188.826	286.214	44668.6	70424.8	196.388	0	67959.7	76102.9	18966.8
412	positive	NA	NA	Gamma-Aminobutyryl-lysine;	-20.7547296089515;	MS1 mz matched	232.154	254.54	73411.4	72994.8	67540.7	71547.6	70424.6	67425.8	71834.9	71789.9	73210.3	67939.1	64486.6	59008.4	114229	155058	65543.9	73082.9	99987.3	40788	84385.6	36747.1	68747.3	54034.8	39576.6	39151.6	54414	130348	86257	56857.1	198312	58386.6	55051.6	82421.8	40111.4	48026	63679.7	64815.4	85601.8	80694.1	50828.5	31690.7	41586.3
435	positive	NA	NA	N-Gluconyl ethanolamine;Dihydrobiopterin;6,7-Dihydrobiopterin;Quinoid-dihydrobiopterin;(6R)-6-(L-erythro-1,2-Dihydroxypropyl)-7,8-dihydro-6H-pterin;7,8-Dihydrobiopterin;L-erythro-7,8-Dihydrobiopterin;6-Lactoyl-5,6,7,8-tetrahydropterin;L-threo-7,8-Dihydrobiopterin	1.25568531052525;-4.17338979468318;-4.17338979468318;-4.17338979468318;-4.17338979468318	MS1 mz matched	240.101	216.358	8513.12	9171.91	8414.59	8830.12	9746.61	9438.6	9170.45	9618.01	9405.47	9718.62	9334.25	14264.6	15907.9	6626.96	16529.6	22372.5	3764.77	4708.9	7259.24	9025.91	7012.31	5891.13	4347.99	8055.93	5959.22	16139.4	1754.37	5390.2	7629.36	11988.3	7496.66	9085.21	10523.7	4816.28	5865.95	5132.79	3144.35	12064.6	5112.74	9437.24	5771.82
439	positive	NA	NA	L-Gizzerosine;Dehydrofalcarinone	-20.656600958686;9.43171306936427	MS1 mz matched	241.154	369.45	10732.9	10164.3	11809.9	10278.9	11618.5	10222.5	9283.14	10105.2	10255.8	10963.1	11186.2	9394.58	8990.6	9806.08	10871.9	14591.2	9587.74	7435.43	14156.1	7164.63	9273.97	7888.58	8586.15	11116	11620.5	12212.7	9318.83	10061.3	17433.6	11655.4	11443.3	7159.41	7703.69	9303.7	11562.5	6272.76	10542	11131.6	8425.66	8042.11	9800.21
453	positive	NA	NA	NA	NA	Unmapped	244.01	236.054	12670.8	11304	9911.7	9406.22	7922.28	9995.74	10227.7	12472	10371.8	9566.12	10953.4	10330.8	10659.7	14332.3	11527	10973.4	11623.1	11779.8	13721.9	10879.4	14599.2	11551.9	11538.7	13840.2	12577	13324.9	12549.3	11583.3	11655	13006	12629	14778	18441.3	13407.3	11696.8	12612.7	13488.4	14797.3	13789	9734.39	12652.3
460	positive	NA	NA	Hexylcaine;Acrifoline;Inundatine;Bufuralol;Hexylcaine;Piperocaine;Metycaine	23.4365835510452;23.3561751619203;23.3561751619203;23.3561751619203;23.3561751619203;23.3561751619203	MS1 mz matched	244.176	269.842	2907.24	3179.65	4702.66	4610.46	3010.39	3836.75	4486.14	4215.58	5133.35	5707.96	5078.77	6146.15	4805.08	3992	4897.07	3111.96	3750.44	3931.92	3530	4850.55	2639.94	6810.95	5243.21	5675.96	3100.66	4062.6	5554.71	4040.99	3237.19	3402.93	5010.04	4195.89	3927.64	3739.52	3850.69	4547.73	5832	4771.76	3789.14	3679.09	3934.03
466	positive	Allocystathionine	0.6028	NA	NA	MS2 forward	245.058	257.13	4059.15	2881.84	3202.09	2824.16	3488.74	5214.41	4778.33	5093.14	4971.44	4748.73	3954.67	1812.85	1979.32	1881.41	2214.58	1667.66	1959.73	3675.45	1436	2734.69	1762.78	584.692	1788.83	1348.77	2010.19	1987.61	362.95	1840.61	2643.42	1978.63	2400.23	1724.57	1528.66	1976.08	1963	1565.81	1142.5	10725.3	2019.37	1597.2	2429.12
469	positive	NA	NA	threo-Syringoylglycerol;	13.5676856568559;	MS1 mz matched	245.106	328.219	16875.7	15257	15740.7	17253.6	18095.2	16432.3	16344.1	17525.9	15463.3	14928	16444.1	25210.7	8940.73	13702.3	8009.41	16072.8	20516.3	3153.67	11115	21955.1	4104.97	42238.8	61875.9	2824.91	5502.78	2284.36	2157.59	14461.1	2311.53	24089.5	1876.25	19239.7	19992.9	43875.7	9969.62	20180.1	9613.06	46729.3	25916.1	9433.95	5848.08
470	positive	Prolyl-Glutamate	0.9554	NA	NA	MS2 forward	245.112	409.113	489.324	630.304	753.431	598.512	553.745	528.741	574.712	570.959	789.955	796.346	428.242	649.796	839.235	862.728	443.529	404.135	426.115	1280.2	796.375	381.307	322.276	641.303	856.625	637.544	476.844	534.61	961.757	577.047	810.104	531.894	4531.09	400.731	574.634	631.785	322.236	421.933	739.002	532.255	436.763	290.282	626.8
482	positive	Nortriptyline	0.644	NA	NA	MS2 reverse	246.169	236.883	32330.6	30645	33137.9	32820.2	32035.9	31118.5	31264.1	33242.9	33355	30212.4	30989.1	19777.4	41681.5	37169.5	33281	24983.8	49782.2	22473.8	39682.6	15868.9	26940.7	25092.8	36698.2	19121	24520	52311.6	37704.9	26626.4	28816.3	32192.2	15516.2	62226.8	19719.5	34429.3	69318.8	37116.6	64276.2	35190.6	15218	16775.2	13156.1
487	positive	NA	NA	NA	NA	Unmapped	246.242	82.5265	40140.1	36300.8	38603.5	36817.1	37128.7	40744	33142.2	32264.7	33139.1	36788.5	28849	16598.9	19085.2	22015.7	58864.4	54637.7	32263	48112.8	75362.8	72963.6	33097.5	49570.4	46717.4	30254.8	40922.9	29163.3	23433.6	26539.8	30245.9	39809.8	24198.2	34987.6	21383.5	30319.3	47680.8	39236.1	41755.2	38136.1	31659.5	32929.7	43122.6
494	positive	NA	NA	Dibutyl malate;3-Hydroxydodecanedioic acid;2-Deoxystreptidine;N,N'-Bis(aminoiminomethyl)-2-deoxy-streptamine	-14.5822277728205;-14.5822277728205;-3.51650900286446	MS1 mz matched	247.143	197.31	58026.7	53965.7	50038.6	50001.9	54229.2	52681.1	51990.6	52827.2	53343.7	50149	49870.1	56878.4	29735.9	14681.4	18093.1	38407.4	66723.1	24805.4	30618	69251.8	26337.5	147280	83676.1	2695.36	18810	8560.74	15795.6	88026.5	4494.02	64377.1	36563.6	8604.99	39150.1	27265	9552.93	18087.9	15573.8	216909	79547.7	8694.44	20410.6
495	positive	Prolyl-Asparagine	0.7077	NA	NA	MS2 forward	247.139	345.051	3341.95	2332.73	3147.68	3064.09	3020.64	1979.28	2390.65	2106.2	3561.07	2940.16	1881.02	1915.5	8914.93	1459.97	1162.52	1674.08	1622.78	3706.59	2402.7	1444.24	981.946	1623.77	4930.42	2099.43	6264.83	3039.13	1753.31	923.597	2360.25	2966.22	8215.85	2286.34	4199.34	4422.28	985.777	3902.33	6424.11	3857.16	1873.91	1788.19	5654.25
496	positive	NA	NA	Mepivacaine;Milnacipran;Mepivacaine;5,6-Dehydrolupanine;Multiflorine	-8.99082386066404;-8.99082386066404;-8.93679734437457;-8.93679734437457;-8.93679734437457	MS1 mz matched	247.176	270.421	94821.6	100300	126290	120504	80532.3	96884.8	107236	118656	117817	147507	124636	154560	143505	92226.3	107587	57398.2	84365	126886	102732	117666	40830.2	172728	125919	158801	58135.4	95320.3	181968	89136.2	106326	94348.6	146764	109041	97347.1	87084.5	92603.9	122053	171422	117768	101186	74542.2	139728
507	positive	NA	NA	Threoninyl-Gamma-glutamate;Gamma-glutamyl-Threonine;Glutaminyl-Threonine;Threoninyl-Glutamine;Yellow AB;1-(2-Phenyldiazenyl)-2-phthalemine	-20.0826703700179;-20.0826703700179;-20.0826703700179;-20.0826703700179;3.87653619089095	MS1 mz matched	248.112	383.286	2610.32	2143.96	2444.68	2468.41	2271.8	2154.44	2520.07	2321.37	2339.79	2436.28	1972.24	2236.32	2456.2	2186.01	2563.85	1595.56	2191.85	2694.06	2147.68	2272.06	3712.95	2202.24	1798.16	2489.78	2016.82	2397.23	4805.85	3442.29	4050.78	2334.21	2049.66	2351.18	2128.27	2177.15	2614.64	2128.79	3675.21	2725.62	2445.68	2333.15	3144.99
508	positive	NA	NA	Threoninyl-Lysine;Lysyl-Threonine;	-19.3481034194568;-19.3481034194568;	MS1 mz matched	248.148	316.759	108003	98717.9	93917.5	93043	96920.2	98015.8	91669.1	96838.1	99007.4	102276	98148	198281	10852.6	87740.6	166933	398001	31905.6	24721.3	62989.6	17305.1	88962	41693.1	29359.3	56828.8	188805	50672.7	64275.7	42750.1	308075	26741.4	175998	25425.3	58439.7	25143.1	57793.7	43428.1	14715.1	50381.1	15302.3	111418	135186
514	positive	Sulfapyridine	0.7661	NA	NA	MS2 reverse	249.053	33.304	14765.7	17067.2	13324.9	14177	13880.4	12985.1	14519.5	13395.5	14144.9	12755.4	8859.14	36829.3	939.198	8681.16	9021.95	1231.89	5738.43	22042	2100.18	5745.29	35166.8	1059.89	12573.4	1514.6	19684.7	533.254	1976.66	14578.5	57212.4	481.218	1130.63	476.708	663.69	1170.23	9799.2	16874.8	2101.66	1202.45	12015.5	18719.7	3365.14
523	positive	NA	NA	2,4-Dichloro-3-oxoadipate	7.89615	MS1 mz matched	250.948	352.413	125751	131370	122787	124831	112228	140015	114773	125853	129019	130992	114886	121903	138530	131579	127952	112926	138835	126691	132868	137618	126910	126381	126891	126788	139772	129635	136954	137166	126103	125083	125710	127164	117433	142121	128807	124451	126737	130038	130448	118284	119980
541	positive	NA	NA	Carboxy-ibuprofen;Ethyl vanillin isobutyrate;3-Dimethylallyl-4-hydroxymandelic acid	-3.63821398521613;-3.63821398521613;-3.81186498023986	MS1 mz matched	254.138	306.783	19090.7	19669.7	18996.7	19388	20033.6	17416.1	17940.8	17263.8	15549.9	17455.5	17792.7	25895.4	1695.49	3360.19	60398.6	14066.5	6188.17	1216.43	1614.12	9888.02	60169.3	2668.9	714.696	22783.3	19187.5	24070	13134.4	30033.4	28613.7	902.081	19410.7	1993.76	1278.29	21203.5	24752.8	4557.35	1629.53	1397.4	47225.7	32203.5	1905.59
546	positive	Daidzein	0.7948	NA	NA	MS2 reverse	255.064	25.996	5117.36	5368.9	7207.99	7168.16	5224.15	5501.94	6274.23	6129.78	5585.7	6212.33	5209.39	4619.52	2596.49	1210.42	53444.3	1390.21	3120.48	58861.3	1140.43	6673.88	562.801	1061.2	7749.03	1619.9	5692.06	252.065	1287.52	1268.81	1057.63	4758.9	59763.6	1322.53	3297.63	4571.31	737.419	2122.9	1392.47	19206.8	892.787	19198.4	1228.33
554	positive	NA	NA	Clausine L;Methyl 6-methoxy-9H-carbazole-3-carboxylate;Ketorolac;Mukonine;Pranoprofen;1-Hydroxy-3-methoxy-10-methylacridone;1,6-Dimethoxy-9H-carbazole-3-carboxaldehyde;	-24.0661051691837;-24.0661051691837;-24.0661051691837;-24.0661051691837;-24.0661051691837;-24.0661051691837;-24.0661051691837;	MS1 mz matched	256.262	35.4135	47450.4	49448.3	51760.1	43021.9	53609.1	47523.5	49079.4	59568.2	51878	55805.2	64205.3	13465.8	39189.9	61821.6	113926	78945.3	85860.1	63085.2	62591.5	111477	68124.9	118434	101079	69222.5	88024.6	79502.3	80923.1	71643.1	67140.8	96154.7	57917.2	90178.9	46983.1	97218.7	71932.9	81407	69332.9	95455.5	78607.7	66418.9	44801.2
556	positive	NA	NA	NA	NA	Unmapped	256.299	588.548	18710.6	19824.7	16706.4	19990.7	18548.8	19115.4	15785.4	18246.6	21346.4	20713.7	19492.7	18077.9	18742.3	16970.1	17957.2	17183.8	16093.6	17817.7	18223.1	18005.8	16305.5	19553	20301	20022.7	21389.3	19203.7	20764.3	20147.7	19691.3	18509	17714.6	17657.6	19875.2	18437.3	17846.6	19111.2	16086.1	16791.7	18478	16254.9	21343.3
561	positive	NA	NA	NA	NA	Unmapped	257.147	271.022	58256	53578.5	50124.3	45395	57327.2	52737.2	52888	52364.6	52768.7	60908	50887.1	54830	47048.8	55268.2	48048.6	79027.2	45364.6	62973.6	79958.9	55947.2	57150.8	67530.2	52461.4	35015.8	38060.6	65078.5	64421.1	29798.5	58178.5	32268.5	38512.6	42745.4	98449.2	37095.5	54094	55496	50185.3	62460.7	27638.9	50618.8	60755.8
565	positive	Glycerophosphocholine	0.9728	NA	NA	MS2 forward	258.109	380.82	93423.7	95493.9	113472	106493	98109.7	92276.5	103262	127970	111652	110813	116290	94496	519447	145967	73921.9	47800.6	105496	113257	85383.5	102095	71784.3	90455	145962	97265.5	187076	66065.8	97730.9	54351.7	62681.8	75646.4	264942	74129.7	142665	132583	78563.6	70487.8	192323	126271	46095.3	51722.3	114244
568	positive	NA	NA	2-Hexenoylcarnitine;	24.5009603650764;	MS1 mz matched	258.169	225.167	5084.26	5396.22	5147.17	4894.96	5291.99	5037.09	4650.15	5471.79	5959.97	5530.83	5280.88	5685.93	3882.06	2958.59	6693.97	10687.5	5716.71	112198	8462.15	1473.27	9398.18	12813.7	1605.85	7316.82	3373.7	5096.33	6689.71	5811.91	10450.8	3913.92	7956.42	4764.19	9581.12	4949.61	3022.96	4301.57	2549.3	6040.57	1987.95	3682.05	8799.16
584	positive	NA	NA	Glucosamine-1P;Glucosamine 6-phosphate;Aminofructose 6-phosphate;	-10.1902059879921;-10.1902059879921;-10.1902059879921;	MS1 mz matched	260.148	283.248	4404.41	3683.97	3269.18	4036.58	3741.43	3853.43	3623.04	3662.99	3882.3	3817.36	4051.62	1819.37	2282.02	5799.58	3259.4	5980.65	3320.81	3012.13	2770.62	1919.31	4914.39	3716.78	1894.83	3705.74	4492.63	6325.38	4619.92	4659.88	6274.4	2873.61	3753.93	2086.17	2876.12	5270.79	2939.14	2555.37	2125.47	5698.2	2605.92	2498.51	3116.7
585	positive	NA	NA	Lysyl-Leucine;Isoleucyl-Lysine;Lysyl-Isoleucine;Leucyl-Lysine;	-17.7624833459177;-17.7624833459177;-17.7624833459177;-17.7624833459177;	MS1 mz matched	260.185	219.895	82652.6	81701	80459.4	89161.5	85739.3	90314.3	86319.4	81267.3	84541.7	87603.8	92028	100623	37209.1	58389.4	86689.8	137326	69013.7	43646.6	89044.5	35329.6	115192	147339	31691.9	72710.7	70805.9	103248	95719.5	87608.4	142393	58140.6	71409.5	44261.6	77173.2	67801.4	109216	107861	138648	68188.9	44355.7	52494.5	63360.1
599	positive	Lysyl-Proline	0.7173	NA	NA	MS2 reverse	261.188	219.911	12248.8	12021.8	11163.4	11771.5	12630.6	13259.8	12211.1	11326	12420.8	12507.6	13832.3	15127.5	5834.47	8809.44	12639.6	18924.1	10264.3	6974.86	12375.5	5444.3	15235	20551.3	4443.66	11330.8	10520.1	16228.3	13492.4	12697.3	20421.1	8419.11	10406	6305.8	12030.3	9090.02	16212.3	15324.3	19114.8	10495.9	6165.02	8301.66	9267.32
604	positive	NA	NA	Aspartyl-Lysine;Aspartylysine;Gamma glutamyl ornithine;Lysyl-Aspartate;Alpha-Aspartyl-lysine;Yellow OB;1-[2-(2-Methylphenyl)diazenyl]-2-phthalemine	-18.2081767550259;-18.2081767550259;-18.2081767550259;-18.2081767550259;-18.2081767550259;4.27361217516888	MS1 mz matched	262.128	392.545	10997.9	12465.2	13000.5	10043	10826.5	8213.86	9036.19	10915.2	9091.42	9645.6	9310.39	6996.98	19646.8	7236.83	10076.1	8549.48	12957.7	10636	9628.37	8764.61	9682.09	9978.79	10454.1	15631	9437.47	16822.5	11936.2	8527.73	7613.04	12086.6	6944.85	8295.87	12833.4	11960	9854.63	7139.51	9536.09	11197	9649.96	7871.21	11422.4
607	positive	NA	NA	Hexylcaine;Acrifoline;Inundatine;Bufuralol;Hexylcaine;Piperocaine;Metycaine	23.4365835510452;23.3561751619203;23.3561751619203;23.3561751619203;23.3561751619203;23.3561751619203	MS1 mz matched	262.186	270.192	4001.86	4424.36	4089.77	5498.24	4489.45	4419.76	5005.78	5930.35	5473.98	6725.32	6042.92	6161.57	5258.49	3870.3	4503.85	2732.8	3582.2	3520.7	4528.89	4708.54	2402.01	7008.73	4778.21	4815.81	2818.43	3610.04	5529.31	4044.06	3055.09	3363.22	5228.78	3466.82	3161.65	6871.08	3823.59	3833.07	8421.88	4869.79	3643.65	3006.56	3350.66
614	positive	NA	NA	Thioxanthine monophosphate;Streptidine	-7.62951094838464;-3.81477002671558	MS1 mz matched	263.146	342.587	12270.2	11336.4	14107.5	12985.2	14313.7	12903.2	12839.7	13820.2	15511.8	13841.9	16412.8	13734.4	28241.4	15514.1	13854.3	34701.2	19306	9967.13	20789.4	10059.4	8153.27	23914.7	24052.4	22197.8	19234.7	20509.5	14742.5	10263.7	19074	8650.29	14197.3	7991.37	30691.3	16480.2	8968.67	20622.7	10623.5	35480.4	7094.33	14599.9	3543.62
623	positive	Alpha-N-Phenylacetyl-L-glutamine	0.985	NA	NA	MS2 forward	265.117	215.625	39822.6	40971.2	37441.1	40140	44396.4	44125	45639.4	49186.1	49561.7	49995.9	54619.6	103129	22245.6	25403	17747.1	52734.9	90920.8	8999	42039.2	72040.1	14817.7	20246.4	19041.4	6993.62	34099.7	9808.56	32772.9	20531.6	22045	92622.4	33919.9	16897.6	5856.72	71911.9	12101.7	82958	37157.6	34045.8	4958.93	39078.5	27806.5
624	positive	trans-Vaccenic acid	0.7718	NA	NA	MS2 forward	265.251	35.104	21290.2	17210.7	21097.3	18318	23012.1	18661.4	20497.8	23980.9	17433.9	21974.4	23616.6	3535.58	7674.51	25152.8	34952.8	29973.5	21964.8	23917.7	17804.1	37424.8	22399.4	34443.7	25799.6	16867.9	22982.9	28053.8	23194.1	24524.2	20261.7	22313.7	16392.4	25317.9	20018	27896.7	25930.2	25235.8	20659	33133.2	27508.3	21536.8	17535.3
631	positive	Pseudouridine	0.6194	NA	NA	MS2 reverse	267.058	242.125	6968.03	6431.3	6260.64	5952.51	7185.25	7257.73	5907.63	6585.11	7915.02	6599.45	6220.69	4967.71	6317.63	7306.54	7582.33	7898.51	5157.24	6863.57	6897.47	6810.94	8472.6	6515.1	5675.2	6531.47	8189.15	8778.67	6418.48	8699.95	10654.6	5642.01	7075.58	5839.85	8049.58	7176.76	7491.1	5213.8	5639.85	6224.86	10642.8	1272.96	7362.05
637	positive	Adenosine	0.9941	NA	NA	MS2 forward	268.103	172.862	2408.75	1974.12	2735.25	2471.21	2827.91	2068.16	2942.32	1944.37	1956.85	2977.91	1642.18	191.479	1235.46	6818.35	14635.8	1841.54	320.81	1006.12	157.33	744.06	549.792	1136.7	405.67	4482.66	206.893	199.488	989.496	1192.42	363.818	927.442	675.554	2319.7	37396.5	0	534.493	373.509	4550.26	418.297	296.719	2194.38	580.423
641	positive	NA	NA	NA	NA	Unmapped	268.997	352.379	1823484	1778988	1605568	1456161	1420598	1348212	1159977	1251848	1145774	1181696	1052310	1102812	1408407	1348896	1180321	1424663	1356315	1659544	1531213	1556866	1514882	1308759	1283495	1655224	1486309	1365756	1181448	1140229	1775413	1691963	1197591	1657042	1181387	1337346	1179339	1621723	1629551	1437598	1183926	1365815	1739546
642	positive	Luteolin	1	NA	NA	MS2 reverse	269.044	26.602	3379.43	3122.31	3501.63	2911.64	3855.66	2954.27	3010.07	2597.19	3223.98	2516.55	3048.28	293.947	631.544	658.828	3295.22	12878.6	244.631	1572.62	877.999	2177.03	193.277	185.294	1299.71	57.3861	774.975	170.032	260.209	140.319	677.705	23925.4	13798.5	268.63	259.257	291.595	265.055	267.429	379.933	134.799	116.218	66986.9	110.23
644	positive	Inosine	0.9956	NA	NA	MS2 forward	269.087	217.439	12606.1	12302.6	11843.7	12060.8	13920.1	13271.4	14498.2	15170.7	13554.8	15141.7	13887.3	6972.1	18528.5	29875.3	26720.4	13046.7	2606.13	31392.1	34013.8	4829.03	4709.24	25245.1	14816	3894.03	1916.31	3513.36	20866.2	28519.8	20100.5	8264.37	5601.77	8458.12	33645.5	1888.64	3842.7	11560.3	7074	4062.43	5237.87	5103.49	4937.48
651	positive	NA	NA	Threoninyl-Glutamate;Glutamyl-Threonine;N-(4-Coumaroyl)-L-homoserine lactone	-12.186504124011;-12.186504124011;22.2595913544235	MS1 mz matched	270.088	35.685	13801.8	15031.9	15159.1	16019	15711.6	13592.6	16523.7	16377.4	15739.6	16717.9	19073.7	28871	29818.2	24548.9	18403.4	21948.1	21866.3	22413.6	23162.5	20544	18036.1	20447.8	23514.6	20939.7	20017.8	23631	21222.5	18803.9	18243.1	21355.9	27133.1	24008.3	25708.6	19049	22267.8	17441.3	27031.1	25899.2	19189.4	25096.1	23499.4
659	positive	NA	NA	Estrone;15-Octadecene-9,11,13-triynoic acid;Estrone;3-Hydroxy-1,3,5(10)-estratrien-17-one;Hexestrol;Exestrol;Trenbolone;17-beta-Hydroxyestra-4,9,11-trien-3-one;17beta-Dihydroequilin;Estra-1,3,5(10),6-tetraen-3,17beta-diol;6-Dehydroestradiol;3-Hydroxyestra-1,3,5(10)-trien-16-one	8.74807433985742;8.74807433985742;8.67367388454437;8.67367388454437;8.67367388454437;8.67367388454437;8.67367388454437;8.67367388454437	MS1 mz matched	271.164	195.114	12572.4	14681.9	13340.5	13834.7	12754.2	11453.3	13392.5	11244.8	11092.4	12922.9	14598.9	8194.58	4678.55	5850.35	8628	17640.8	7610.15	14083	3403.09	7457.74	14622.4	4774.07	5546.41	16009.9	14276.8	8562.92	14162.6	11451.5	16767	3014.08	14709.6	1960.66	12367.8	4861.55	10126.2	9801.67	3266.45	6621.7	3479.76	10670.9	10574.9
665	positive	NA	NA	NA	NA	Unmapped	272.257	36.956	15936.1	11803.1	15959.2	16433.7	13512.4	15004.3	13552	14018	14608.4	14561.3	14561.3	14502.9	28821.6	19941.8	24690.1	25304.3	20837	30871.5	31847.8	25325.1	28344.8	29553.2	28141.8	25740.7	26006.3	19626.3	30960	23404.5	24244.6	26787.4	24218.2	22899.6	26149.1	28312.1	20101.9	43944.4	35540.6	33716.4	27095.2	25469.9	35732.9
682	positive	Palmitic acid	0.7693	NA	NA	MS2 reverse	274.273	52.95	646099	734851	685670	637289	652903	675492	609636	598793	639126	539454	625704	1034605	1194546	1087387	1031510	959079	1185280	1678851	1122130	1721681	992033	1203769	242531	1399969	1471122	1047880	1172210	948341	1202713	1474124	840266	1091000	1039641	1025192	1138715	1525794	2404638	2564983	1284234	1656396	1879441
693	positive	L-Pyroglutamic acid	0.7008	NA	NA	MS2 forward	276.118	421.079	10683	10197	10813.2	8861.87	11212.6	9359.12	10926.8	9278.51	9246.24	11634.4	9139.04	9075.06	19234	10031.5	17964.5	5768.04	6962.44	6806.49	21700.6	8274.27	7280.07	15240.5	9345.03	20076.3	3229.58	9033.7	26917	8412.75	6965.81	16564.1	11187.3	11828.9	14637	8452.81	18734.1	9738.43	21660.2	8890.29	4620.1	2999.35	6493.19
695	positive	NA	NA	Epsilon-(gamma-Glutamyl)-lysine;L-a-glutamyl-L-Lysine;	-17.135369637683;-17.135369637683;	MS1 mz matched	276.143	393.243	9082.71	8810.88	10986.4	8141.13	9180.27	7334.02	8167.01	9253.38	7301.65	7557.89	7061.83	6984.19	8293.7	6686.63	7482.51	9379.32	12231.8	6063.26	5844.52	10315.6	14750.4	6310	10655	7490.25	7422.15	11647	6423.1	5609.85	11415.2	9212.96	7321.52	6334.34	5202.75	11868.7	7190.45	8909.89	35819.2	9492.13	6959.4	8258	6555.63
697	positive	NA	NA	NA	NA	Unmapped	276.18	269.593	6245.23	4895.41	5447.1	4904.23	4494.77	4334.69	4322.96	4102.7	3735.11	3871.45	3512.03	6351.98	1034.3	3413.85	4071.67	10301.3	3218.86	2356.23	4128.72	2576.43	11105.4	2953.73	2209.09	8814.16	9348.05	3075.3	3852	3179.47	15339.5	3880.18	4998.96	3033.92	4138.59	2492.54	2942.5	3036	2073.01	4231.5	1847.35	7128.76	8155.47
721	positive	NA	NA	Glycerophosphocholine;Tolmetin;Ismine	-3.20455445608321;-12.446267131312;-12.446267131312	MS1 mz matched	280.092	380.788	70518.4	64803.6	71894.9	70474.6	66297.3	62525.8	63691.4	77878.4	77125.8	68004.4	76512.7	61066.4	141423	77387.4	66752.9	102220	63194.9	66088.6	72889.6	57301.2	57377.8	68921	70883.3	68413.1	91531.6	110501	68368.4	50326.8	63298.4	62972.5	118040	63141.2	81433.2	66009.9	59229.4	49151.7	95867.8	80845.8	108746	49335	71502.9
722	positive	Propionylglycine	0.8991	NA	NA	MS2 reverse	280.154	231.17	24883.7	24725.2	27260	23777.4	22761.6	25725.2	24078.5	27762	24883.9	25427.1	24679.1	56045.6	6159.56	18255.2	9886.17	47426.4	48881.6	10306.1	20925.1	14865.8	8447.29	34384.8	7668.67	5001.5	14845.1	18268.5	14851.1	17835	14211.9	70416.1	13622.3	15900	4866.68	26490.3	24905.4	43916.8	18191.6	35972.4	4686.99	8423	9472.68
723	positive	NA	NA	2-(5,8-Tetradecadienyl)cyclobutanone;6,10,14-Trimethyl-5,9,13-pentadecatrien-2-one;4-Dodecylphenol	1.27521803941346;1.27521803941346;1.1440351723637	MS1 mz matched	280.262	35.798	117347	124045	136501	117360	131390	133582	150282	148047	133745	141261	174108	10424.8	41580.6	148198	239647	203001	146924	146393	141887	271626	126417	258034	191134	134622	185790	217243	144089	127155	126650	181118	103355	209096	126280	165850	155051	211493	114552	196408	130934	127259	108402
728	positive	Phenylethylamine	0.9619	NA	NA	MS2 reverse	281.137	36.312	24643.1	27405.6	27473.8	24446.1	24315.8	25469	29045.8	23395.1	24267	26020.4	20442	5818.16	6988.2	7643.93	12195.1	6891.91	10625.8	8936.67	10765	8941.07	16465.9	15283.4	7382.44	13923.5	10769.3	9697.08	16989.8	6923.32	6278.12	18283.5	14138.7	8474.87	6512.41	17320.3	20194.5	16492.6	12418.5	9651.46	10840.7	11256.1	7885.16
733	positive	1-Methyladenosine	0.9964	NA	NA	MS2 forward	282.119	285.901	36529.2	33101.3	31188	33209	35240.9	33922.4	36558.2	31408.7	37366.5	35751.4	40081.7	40940.9	28564.2	36832.2	51503.1	39293.2	41875.5	41516.9	32635.3	37391.8	49043.7	35073.6	33403.8	42951.2	45382.1	42257.8	36958.3	53710.2	39191.6	35143.2	34908.8	33966.9	27269.3	40248.4	38298.8	35823.6	33138.7	31036.8	63721.1	35153.2	36943.4
736	positive	NA	NA	Cycloheximide	22.7159	MS1 mz matched	282.169	307.525	7389.15	7961.83	8648.76	8995.34	8710.66	8833.54	8676.09	8706.87	9181.89	7733.71	9535.8	12379.4	849.187	2074.58	32587.6	9740.43	3261.3	811.846	1011.58	5102.25	22925.5	995.564	1122.59	7403.88	11444.2	9465.44	6196.79	13223.1	17964.1	889.176	8055.52	706.572	630.139	9959.24	8980.31	2045.08	887.149	774.597	16996.2	17174.5	772.862
737	positive	NA	NA	Oleamide;Dodemorph;Oleamide;Oleyl amide;(Z)-9-Octadecemide	24.2613897848648;24.1358854011599;24.1358854011599	MS1 mz matched	282.279	34.9515	682322	705971	739896	665658	769740	672512	726597	737726	796255	786736	752948	69005	253271	1072547	1395414	1083199	982788	796591	862367	1274390	845743	1493152	1027109	788896	1063079	1211284	1034991	865534	717806	968864	648334	1030197	790992	1087082	1021588	941965	718934	1385023	862109	776051	546594
740	positive	NA	NA	threo-Syringoylglycerol;	13.5676856568559;	MS1 mz matched	283.061	327.997	10312.9	6516.44	8456.92	9210.02	9767.15	8262.14	8922.49	9275.2	9572.24	7492.27	8778.93	15105.1	5409.16	7910.32	2671.14	8566.54	13776	1480.68	5023.76	11111.3	2034.85	23829.6	34821.3	750.672	1058.62	1268.53	1063.08	9118.14	901.319	14369.4	755.602	12655.9	11905.8	23393.2	4778.57	12808.3	4675.48	23905.7	15584.9	4252.68	2539.03
754	positive	Isoleucyl-Asparagine	0.6282	NA	NA	MS2 forward	284.106	380.974	1183.53	1455.04	1639.03	1302.52	1608.88	1621.34	1531.36	1975.5	1735.25	1561.31	1896.47	1720.57	6973.47	1737.89	1201.39	906.987	1735.55	1791.32	1674.44	1654.39	1451.48	1465.79	2449.59	1529.2	3320.86	1162.82	1551.45	1039.48	842.628	1020.54	4653.5	1357.66	2177.3	1943.29	1443.76	1204.79	2474.29	2086.11	853.948	1005.82	1746.18
763	positive	Glycitein	0.9147	NA	NA	MS2 forward	285.075	24.162	6155.3	8395.22	8062.79	7378.47	7230.72	7122.33	7099.89	6243.46	7228.85	7148.1	6621.34	865.765	1082.31	2060.07	4503.51	15413.5	1074.9	6159.85	1240.99	2883.81	594.884	811.06	1937.03	525.751	1912.14	781.534	841.13	559.301	924.673	45385.5	12758.1	562.476	703.374	1616.93	584.142	774.206	683.927	2966.74	2212.3	218333	559.885
777	positive	NA	NA	2-Octenoylcarnitine;	23.9090674530195;	MS1 mz matched	286.201	209.175	365478	369283	361966	325767	377874	338829	366115	343333	329262	331054	324874	230868	208130	309090	318481	159968	207866	409393	201550	143633	522501	310725	215020	658882	375433	668360	674336	384877	568189	224119	306390	145889	480554	140138	412319	246252	255598	269535	115518	237472	321895
784	positive	NA	NA	Tenofovir;L-Octanoylcarnitine	-8.00801358454332;1.04453296661477	MS1 mz matched	288.216	199.437	145413	148812	150482	150170	145469	149586	144777	146792	144228	145861	147086	196737	67529.4	161747	135120	133649	91585.9	79707.3	85640.6	71981	147151	148367	68841.1	148039	108033	198051	134380	133414	178308	76175.8	63205.9	59724.4	149678	101220	185642	243104	394194	82402	65841.5	103273	98264.7
785	positive	Heptadecanoic acid	0.7692	NA	NA	MS2 reverse	288.289	73.946	42042.3	45266.8	45970.8	45897	65858	46148.1	41812.6	49538.3	45322.1	40421.4	41005.4	4147.13	7020.03	5038.34	4996.13	4468.49	7960.15	7228.09	6825.71	6939.86	5244.88	6775.45	10183.5	8020.04	6335.37	8778.36	5368.02	4863.96	4149.05	7823.15	6311.99	8220.77	5022.65	4149.58	2958.66	9182.46	9204.39	9409.51	9966.66	8079.22	9624.01
795	positive	NA	NA	3-Methylglutarylcarnitine;	22.8458863827946;	MS1 mz matched	290.159	388.258	40904.1	45478.9	43651	38116.4	40945.1	39604.5	44146.2	50803.3	47475.1	47224.4	41900	36672	8023.42	94524.8	149034	46703.5	31034.1	19687.3	22323	11849.1	57546	29272.8	15880.2	90749.1	73338.3	25602	44952.5	24036	183548	23677.7	92130.9	29353.4	62060.2	23449.7	43037.3	46272.5	9118.38	30908.2	26249.1	48160.8	48985.7
808	positive	N-Acetylneuraminic acid	0.94	NA	NA	MS2 forward	292.102	515.098	7794.27	8690.94	8400.39	7261.33	8045.76	8183.75	8032.35	8332.07	9706.36	9004.28	9683.73	11051.1	13751.6	11285.8	13321.8	13954.4	18862.9	13276.7	12417.9	11318.9	13867.9	7188.49	15619.9	25199.2	10432.9	18581.8	11028.2	8672.14	13538.9	15885.5	11433.3	13041	8848.85	12802.7	17993.8	16657.7	7442.55	10519.1	10133	13853.7	8386.12
811	positive	NA	NA	NA	NA	Unmapped	292.959	352.437	467824	459384	441664	416974	446036	424879	341768	397654	375658	388290	348048	359881	431846	412516	398891	425081	422308	467167	459680	454653	450764	414390	417476	455102	456078	413728	406897	369570	478669	452023	393900	435072	380343	425764	383851	455782	467793	436947	389413	412193	462390
821	positive	NA	NA	Tyrosyl-Hydroxyproline;N-gamma-L-Glutamyl-L-phenylalanine;4'-tert-Butyl-2',6'-dimethyl-3',5'-dinitroacetophenone;Hydroxyprolyl-Tyrosine;Glutamylphenylalanine;L-gamma-Glutamyl-beta-phenyl-beta-L-alanine;Aspartame;Aspartame	-18.9435272218036;-18.9435272218036;-18.9435272218036;-18.9435272218036;-18.9435272218036;-18.9435272218036;-18.9435272218036;-19.0397441058915	MS1 mz matched	295.117	36.199	15979.3	14877.2	18121.8	14482.6	13077	16233.3	15379.4	15909.8	15824.6	14501.1	16692.3	8211.08	4684.33	5155.3	7819.76	3020.22	6136.64	5303.95	6998.74	6475.19	8046.47	6248.62	4152.21	7630.34	5629.01	7474	9556.46	4757.68	4678.12	11890.1	9445.03	4713.51	7391.8	11152.1	13159.8	9291.32	7661.3	5829.81	4979.23	10673.7	7919.08
830	positive	cis-9-Palmitoleic acid	0.7488	NA	NA	MS2 forward	296.258	36.189	49586.1	58943	50788.9	51420.9	54655.8	56361.8	56590.9	56169.3	56245.7	55935.9	57160.6	7376.9	39120	37725.4	97735.5	79852	42652.5	64700.7	48275.3	143559	45750.3	131088	94596.9	38905.5	68070	53445.3	40994.3	46417.1	34699.4	76298.1	29350.1	86965.1	32141.1	46671.1	54141.8	96340.6	34581.7	60609.2	25759.5	32295.5	35668
842	positive	2-Methylguanosine	0.6472	NA	NA	MS2 forward	298.114	197.841	5380.7	4076.53	4266.56	4293.18	5381.19	4643.51	4965.77	4562.2	5202.81	4627.37	4405.72	3974.99	6126.33	4244.5	3993.65	4465.25	2249.44	5398.23	3865.13	3415.68	4886.12	3848.8	3982.56	5834.03	5638.3	4342.24	4256.78	4930.46	6434.6	3585.3	7077.99	13429.8	4427.19	4747.31	4747.22	3307.36	2015	2725.16	7375.27	1814.07	6707.83
845	positive	Linoleic acid	0.8711	NA	NA	MS2 forward	298.273	111.232	5677.2	5763.28	4842.76	5924.99	4925.94	3410.37	4833.47	4034.73	5404.78	4143.89	2824.63	2191.36	3218.18	1496.1	3370.47	2750.47	4842.76	4354.56	442.816	4259.06	2291.75	3353.29	2071.17	1015.88	6763.93	2109.87	1608.55	1260.01	2630.42	4806.43	1826.62	2214.95	2748.82	5316.76	1183.91	4617.14	1521.84	2057.04	6076.98	904.871	4147.05
851	positive	NA	NA	D-4'-Phosphopantothenate;	3.95308428832194;	MS1 mz matched	300.216	197.777	9729.48	9735.98	8740.86	8465.96	9256.23	9248.82	10113	9376.18	8493.6	8439.37	9017.42	5735.93	9868.42	4341.2	8173.63	3790.64	6901.67	15290	6509.18	11890.2	19751.6	7615.3	6939.61	10395.6	6966.07	8250.28	11942.8	18669.3	12393.7	6937.55	3828.48	6223.02	12264.2	6872.37	8866.92	6620.01	6514.69	6927.27	21734.6	8156.01	7049.55
852	positive	Sphingosine	0.9908	NA	NA	MS2 forward	300.289	109.074	20430.3	21547.4	17917.5	21063	19815.2	19727.2	15879.1	17350	18417.8	21195.5	14126	13510.1	21907.6	7021.96	11402.9	11704.8	20079.9	26146	8935.28	14659.8	10931.7	11667.4	7105.9	9300.83	29408.9	11378	5964.03	8575.73	11991.7	14790.1	9708.11	10860.1	15082.1	19373.8	6597.98	13065.8	6789.15	7848.02	20456	13103.5	21112
868	positive	NA	NA	NA	NA	Unmapped	302.195	281.05	3288.6	3216.34	3865.14	2986.93	3729.43	3935.88	3301.12	3460.35	3628.38	3189.48	3713.79	2298.23	1821.39	2872.24	4513.84	1829.96	1561.38	1774.74	2756.25	1252.47	6148.08	1348.64	1537.54	4879.81	5831.96	4240.34	7964.29	2942.01	11357.9	2322.92	2666.73	1260.62	5187.75	1553.25	2596.3	1848.67	1346.12	3045.15	1767.56	4211.69	3604.02
877	positive	Flumequine	0.9967	NA	NA	MS2 reverse	303.111	253.486	1339.42	1127.54	562.078	1073.28	802.332	1516.98	1012.84	1299.19	1077.95	1387.32	1557.09	972.675	1188.66	1097.36	983.952	1569.61	1504.53	886.029	1283.54	1297.66	896.985	1823.19	3585.07	785.443	1037.24	1021.99	1205.6	699.223	1016.95	1837.18	1081.79	1286.42	1721.67	2458.27	800.042	1373.5	1131.74	2365.91	1863.78	1517.99	1242.74
881	positive	20-Hydroxyeicosatetraenoic acid	0.7714	NA	NA	MS2 forward	303.231	56.7115	5855.72	6846.67	4972.93	5378.61	6271.85	6500.39	5418.96	4787.47	8125.95	2812.15	3919.54	3545.08	27315.4	8715.74	1708.26	2975.18	2865.39	8795.59	4222.8	4484.56	2888.43	6530.4	9363.64	2668.11	5944.47	4739.93	2474.98	3485.94	4952.18	8502.17	9521.24	2750.19	9974.07	3708.47	4979.52	1336.15	4835.96	4028.94	365.951	2049.35	9856.31
885	positive	NA	NA	Pimelylcarnitine;	21.5767104521489;	MS1 mz matched	304.175	374.368	9260.15	8807.05	7863.64	9654.09	9962.87	10486.9	9998.75	10307.7	9783.92	7983.7	8554.9	6916.42	3116.7	15272.2	13960.5	4027.79	5424.81	3796.79	5982.77	8676.39	19395.5	7854.69	4924.28	9102.07	16009.2	10399.4	7078.44	9295.14	20970	11554.7	6263.02	9458.4	19740.5	9819.68	5707.37	7122.44	2973.45	7182.36	19670.7	7352.18	22420.5
886	positive	NA	NA	NA	NA	Unmapped	304.211	237.481	30102	29519.3	29605.2	33938.5	34515.8	26441.1	31831.4	27969.8	31248.5	27085.3	31178.6	28350.5	13864.9	25937.3	36404.3	32367.3	25145	18404.1	26203.1	41582.6	28427.9	36203.7	17181.1	31922.1	23802.7	33125.9	26389.9	38416.9	39328.2	16269	19946.1	15285.9	22680.2	21684.3	35144.5	25290.1	32957.3	34963.2	20253.6	24417.6	45804.4
895	positive	NA	NA	Guanosine;8-Hydroxy-deoxyguanosine;Guanosine;Isoguanosine;Crotonoside	11.7679196159712;11.7679196159712;11.6570001876575;11.6570001876575	MS1 mz matched	306.08	260.585	2807.53	2420.94	2311.05	2776.79	3003.02	2582.5	2799.34	2791.36	3432.41	3424.64	2931.91	2889.98	3293.67	7085.51	4686.78	4040.17	1093.45	3426.78	7023.69	1756.54	1467.33	5046.46	3815.8	787.886	633.046	1745.74	2735.77	6714.58	3437.49	2812.84	1634.17	2476.29	7036.47	1093.18	1056.3	3218.93	2338.89	947.311	2127.15	1781.12	1401.54
897	positive	NA	NA	Dichlorphenamide;Buprofezin	-16.4748165316421;-7.29933895493559	MS1 mz matched	306.154	403.099	5667.44	4309.42	5996.77	5508.96	3953.31	5170.72	4123.35	5855.58	6339.67	4541.69	4344	3769.49	1008.38	6042.18	11445.7	4188.01	3020.53	2986.56	3798.6	2169.85	7168.11	3990.09	1983.61	7923.05	7402.41	4242.84	5784.46	2893.29	17420	4232.93	6037.22	2811.23	7069.87	3182.46	7254.45	5917.4	979.536	4448.25	3863.6	4017.09	5507.37
905	positive	NA	NA	Naematolone;Matricin;Achillicin;Lupite;Lupinic acid;3-[N6-(4-Hydroxyisopentenyl)adeninyl]-L-alanine;(S)-2-Amino-3-{[(E)-4-hydroxy-3-methylbut-2-enylamino]purin-9-yl}propanoic acid	-11.2784687294296;-11.2784687294296;-11.2784687294296;-2.38144876588509	MS1 mz matched	307.143	254.135	7489.78	6704.25	5908.13	5966.15	6165.13	6006.19	6347.32	5460.7	6137.35	5918.81	5855.14	5406.4	6574.15	7654.57	5228.07	4260.1	6921.73	6957.63	8844.98	4347.2	4459.72	4830.95	8766.9	5002.87	6846.38	6814.79	7529.94	3324.26	6173.57	6720.39	6091.73	10049.2	6854.53	5580.37	7848.06	8556.03	8301.67	13527.2	2579.98	3237.16	4420.23
921	positive	NA	NA	Tenofovir;L-Octanoylcarnitine	-8.00801358454332;1.04453296661477	MS1 mz matched	310.201	199.063	180434	183934	183010	177213	189757	185874	188972	186815	190422	196163	185027	118717	144321	109213	139665	86968.2	164392	213126	89079.5	160208	299493	126347	97151.6	217480	168980	215320	370234	224746	232253	82291	212459	57764.6	214147	75049.5	208383	141291	80110.9	104027	130795	108643	179234
923	positive	NA	NA	noroxymorphone;(R,S)-Norlaudanosoline;Pipermethystine;	5.22083251402707;5.22083251402707;5.22083251402707;	MS1 mz matched	310.309	34.627	26285.4	27317.7	26433.8	27143.8	25906.9	29708.7	26837	29286.2	31440.3	25658.1	33794.2	7796.17	7417.89	22955	43194.2	32716.1	29979.6	20662.5	22586.7	29287.6	23587.3	39572.1	28206.4	33426.7	30569.7	29262.8	24537.1	28496.6	22510	27308.4	19719.5	29626	19223.3	44914	30493.8	33964.8	28421.5	36773.9	23052.5	22573.9	17197.8
934	positive	NA	NA	2-trans,4-cis-Decadienoylcarnitine;	20.2209939092277;	MS1 mz matched	312.216	194.3	23369.2	21392	24888.5	24914.8	27153.9	24623.6	31728.8	25368.6	25002.1	30198.2	26765.1	22287.8	18373.2	15830.7	26643	22482.5	21955.9	26414.5	13574.5	20758.2	28620.5	20303.2	17144.1	26385.5	19789.7	42807.3	60082.1	44330.5	34546.8	14829	21525.4	14586.8	33975.2	15109.1	32441	23038	27827.3	18223.8	17564.8	17117.7	18256.9
938	positive	NA	NA	Epithiemycin B;Epithiemycin D	-3.2043271232716;-3.2043271232716	MS1 mz matched	313.085	212.458	13666	14573.4	13892.4	14643	15618.4	16871.5	15684.6	20016.8	19116.6	19196.1	18731	14836.3	721.561	7827.68	18150	759.375	457.92	50901.6	2113.56	18667.2	72991.9	927.926	12839.2	502.067	28208.5	1133.87	643.933	59873.7	43326	873.45	759.13	904.198	382.512	943	18666.9	20051.5	879.365	989.268	49027.7	24833.7	7226.74
944	positive	NA	NA	9-Decenoylcarnitine;	21.2107416600803;	MS1 mz matched	314.232	190.073	75077.3	102444	100537	98820.5	102077	105044	104319	101552	90374.3	97157.4	109692	98322	54626.3	47793.9	131486	60082.4	81041.8	85839.9	50981.4	58597	91752	84778.7	62288.7	89343.5	73441.2	114478	174880	134353	103042	35876.3	46064.6	29423.6	133247	73288.4	154003	123859	201815	60974.4	52058.6	72359.1	58374.6
946	positive	NA	NA	Laurelliptine;Moupinamide;N-cis-Feruloyltyramine;Muricinine;Laurolitsine;	-22.0220009683388;-22.0220009683388;-22.0220009683388;-22.0220009683388;-22.0220009683388;	MS1 mz matched	314.341	137.843	49783.6	57124.8	57079.6	49833.2	60507.9	53617.3	59609.2	67612.4	58303.8	54418.4	63014.1	18570.8	279639	18236.7	17418.4	21017.5	62952.2	129147	46330	57819.6	117435	71764.3	333687	25658	85719.1	13966.9	112038	26975.8	12611.6	31889.7	30543.7	89391.1	24615.4	101855	77688.7	37436.8	86317.1	17442.9	46874	72245.9	26076.5
947	positive	NA	NA	NA	NA	Unmapped	314.787	321.069	15415.5	14003	13917	13737.6	13156.3	11609.9	12639.4	14090.6	11694	11612	10784.6	11830	18887.9	13096.8	7704.12	11462	9177.86	23683.9	12866.4	12231.7	13607.5	11038.9	16792.7	18438	11642.6	12408.2	14657.7	10777.4	11870.6	14345.3	22576.3	13595.3	12508.1	14640.6	16467.2	11964.9	13624.2	12099	9299.78	8704.18	15937.7
956	positive	NA	NA	Alizapride;	16.5956549245576;	MS1 mz matched	316.175	372.024	8678.73	5917.55	6636.24	10138.8	10302.5	6474.18	6997.69	10363.1	6793.6	6593.57	7847.68	5258.58	2654.32	5752.31	9969.96	2498.05	8037.48	6435.55	4513.34	4739.38	15487.2	4625.4	7751.55	10870.1	6357.99	5610.15	13160.7	4005.93	14757.2	3664.44	12450.5	4978.99	19323.8	3627.19	7952.51	6635.18	2539.59	4899.98	4697.07	4990.8	11414
958	positive	NA	NA	Citpressine II;	-1.28097754805141;	MS1 mz matched	316.32	69.848	89245.3	87675	104427	88082.1	97072.2	96998.7	100194	86320.5	98577.4	87715.2	88887.9	652.223	1114.24	4164.49	1783.16	4841.07	4858.94	4459.64	2135.3	1906.02	3871.03	3192.69	2590.37	671.471	834.507	842.663	3958.87	1329.66	852.527	1070.32	3294.97	4243.94	2935.05	913.48	903.866	4369.02	4669.98	4965.16	3277.59	2802.82	6233.28
962	positive	NA	NA	NA	NA	Unmapped	316.92	352.437	126472	129750	123502	126191	134935	145492	136073	134269	130273	145168	135970	139039	154230	139384	135102	124625	148813	136737	136900	145961	131198	149040	135538	130483	140596	142455	145118	138370	125722	126761	131302	121252	129241	139506	136757	127663	130020	136890	131973	132502	123884
964	positive	NA	NA	Griseofulvin;Griseofulvin	-6.72022842094743;-6.8167990923602	MS1 mz matched	317.048	321.151	5536.19	4997.28	4959.76	4332.16	4418.77	3950.96	3871.81	4140.34	3460.43	3752.57	3635.65	4287.78	4201.33	4456.52	3297.88	4013.31	3351.93	5159.35	4255.03	3793.06	4959.5	3475.87	4343.69	4728.93	3498.93	3794.98	3821.37	3991.66	4695.06	4618.65	4063.7	4753.97	4096.3	3943	4559.97	4653.06	4933.59	3937.97	3675.59	3913.64	4956.86
974	positive	NA	NA	Terodiline hydrochloride;	-2.02624843102568;	MS1 mz matched	318.19	366.447	35065.8	33758.2	30244.3	32294.7	31144	33175.8	32127.8	31259.7	33510.3	29508.6	30653.9	47666.1	4006.3	47018.9	65236.2	53132.9	19059.9	15332.7	18480.2	8221.36	48860.1	17470.1	13905.7	64729.2	59084.7	33083.9	46460.1	21559.4	81148.7	17101.3	33661.2	18409.7	21136.9	16435	28616.8	41040.3	6743.26	14417.4	21346.6	53178.1	32886.2
980	positive	NA	NA	N-(1-Deoxy-1-fructosyl)histidine;Phytosphingosine;4-D-Hydroxysphinganine	13.3373874990051;20.2711343584337	MS1 mz matched	318.299	78.782	212359	205224	201703	197743	207204	219969	213426	213132	200019	194732	198644	305348	279901	301596	427939	329200	298862	289525	310603	376865	268699	400497	369018	382772	401489	326343	291646	299773	262945	377058	291687	301686	251304	286557	312461	515341	409354	419245	453054	435627	405045
1002	positive	Erucic acid	0.7797	NA	NA	MS2 forward	321.314	34.13	10135.8	11182.3	11797.2	10208.1	11892.8	11526.8	11841.7	9815.81	10953.2	11509.2	14900.1	6566.25	6675.47	4680.89	12735	11372.8	7634.52	9305.05	5078.82	9776.42	6055.76	11235.5	2872.62	15124.7	6199.3	9592.37	7142.18	16005.2	10929.5	7475.4	10267.9	8893.9	13486.7	9615.38	8525.56	13125.1	11572	8089.54	12462.7	11663.6	7792.33
1011	positive	2'-O-methylcytidine	0.9993	NA	NA	MS2 reverse	324.058	344.019	8343.69	6641.4	6899.03	6024.76	6803.05	6852.3	5564.49	5578.01	5229.84	4834.3	5315.6	3853.49	2237.27	4574.46	3945.93	2143.29	3553.63	1241.36	1320.29	516.814	11038.7	2893.95	3239.1	1793.2	1844.85	2684.06	979.689	24323.4	8038.59	1768.78	5780	30430.5	2582.59	3087.57	17574.5	3035.88	680.325	2168.91	3250.06	2844.24	13314.5
1019	positive	D-Lactose	0.8813	NA	NA	MS2 forward	325.112	394.878	3979.68	3926.86	3003.42	3252.08	4640.14	3313.54	3130.61	3180.69	2737.11	3956.53	4193.28	2452.22	1301.57	808.242	1571.69	2089.59	1400.52	1430.34	1343.72	1216.47	1221.22	1371.77	1222.49	1459.55	3078.8	2050.99	3472.58	13385.6	36876.8	1058.43	1476.55	1199.14	1752.12	1127.05	3470.38	1034.42	1048.52	1052.57	8062.29	976.785	988.808
1028	positive	Stearic acid	0.9999	NA	NA	MS2 reverse	326.304	35.716	14361.1	13999.2	14148.4	13259.2	14565.4	13450.1	15462.3	14979.4	13845.7	14128.5	12400.3	13003.9	6839.84	18802.7	12155.9	21509.2	11756	10704.2	19628.4	15230.3	11503	19242.5	10895.4	14923.9	8721.9	16544.5	13524	11284.7	25984.8	13865.8	22405.2	9959.06	15795.3	14813.9	14824.4	15261.9	8534.61	13726.5	10694.2	13641.2	12220.3
1030	positive	NA	NA	Sakacin A;Vidarabine;9-beta-D-Arabino furanosyl adenine monohydrate	18.1994047240818;5.96266738863287	MS1 mz matched	327.14	217.394	6129.94	5642.47	5828.63	5858.81	5494.25	5877.54	5573.98	5676.72	5470.15	5579.52	4580.83	2566.12	7316.34	11525.8	9571.5	5969.86	1315.31	13696.5	14305.6	2067.03	2479.88	9665.34	6009	2091.25	944.435	14481.2	7306.58	9519.43	10991.4	4732.91	2106.45	4391.11	13075.7	926.321	1324.97	5630.66	3754.34	1979.15	2651	16158.3	2575.46
1036	positive	Histidinyl-Glutamine	0.9841	NA	NA	MS2 reverse	328.102	300.142	3144.92	3721.28	2958.12	3010.77	3361.49	4056.43	2552.15	3271.18	2834.16	3405.2	2839.2	7208.23	1606.31	2271.31	2221.1	1523.83	1335.71	11339.7	1329.95	3004.11	8421.32	1162.78	6859.19	1074.22	4555.04	980.722	1066.38	6517.37	15606	371.344	1430.88	1839.62	1270.09	1333.09	4850.57	10321.5	1417.23	1010.49	7386.25	17655.3	1853.74
1041	positive	NA	NA	Diloxanide;Rhododendrin	5.10687888967234;-10.7395074998515	MS1 mz matched	329.149	34.7635	18797.5	25898.2	25045.6	24457.4	29306.4	26302.2	27603.2	24620.1	23311.2	24985.6	30159.4	59549.5	6146.33	14476.9	24795.1	30391.8	27108.9	8935.2	26354.4	18259.9	9013.28	14242.9	23963.8	20541.1	40048.1	11442.9	16819.5	11859.6	7582.86	10623.5	11173.6	356168	49247.4	21489.9	10239.3	16544.1	33160	14079.1	18014.7	187605	12895.3
1049	positive	NA	NA	Sakacin A;	18.1994047240818;	MS1 mz matched	330.227	216.424	12013.3	7128.17	7740.74	7225.19	8402.32	10992	8454.85	8414.52	8618.66	10944.8	7655.24	7727.06	3263.46	12379.4	16022	7489.45	5344.84	5380.43	4887.1	3525.45	21445.4	7892.23	2768.84	10485.5	7524.45	10949.6	9762.55	21073.7	21872.1	4509.45	8548.7	3545.9	7627.74	6107.08	6294.4	5955.56	3270.16	5934.98	7948.65	12649.1	13098.5
1050	positive	NA	NA	NA	NA	Unmapped	330.336	68.378	483498	449161	536427	550986	501811	568981	549721	424574	457475	385380	426323	9835.38	12594.6	40756.1	54660.8	77124.8	45200.7	60515.7	45584.2	64169.2	49173.2	86454.7	46759.2	41836.6	40698	28460.9	33471.4	31421.6	26369.7	41279.1	25355.3	63707.4	26031.7	25937.5	26042	53826.7	39463.9	58962.9	33984.3	42041.2	51696.9
1051	positive	NA	NA	NA	NA	Unmapped	330.336	41.677	58380.2	56196.1	50970.3	59223.8	45853.5	48071.1	90207.6	80980.7	82247.4	51685.5	58797.7	3514.49	2487.01	8583.04	9055.03	14255.5	7613.18	10212.4	7219.88	14822.1	9254.68	12085.9	10903.6	6668.58	7748.24	6758.12	7500.03	6411.18	6068.06	8069.43	6952.91	10839.5	6931.51	4468.98	5557.55	8943.29	7606.23	12078.1	7487.12	6863.23	16755
1053	positive	Inosine 5'-monophosphate (IMP)	0.9947	NA	NA	MS2 reverse	331.044	436.363	1315.74	1301.32	1044.85	1713.73	990.065	1093.11	873.525	1003.84	1166.7	1099.72	823.249	779.293	875.271	876.596	827.999	840.154	873.56	893.936	817.136	934.563	913.569	725.2	876.278	716.082	858.391	704.096	913.716	838.026	740.052	833.825	906.687	913.612	723.74	713.433	766.685	761.516	792.927	838.342	896.088	736.647	792.526
1054	positive	DL-Phenylalanine	0.9644	NA	NA	MS2 reverse	331.165	254.527	2361.45	2468.95	1809.66	2364.06	2410.47	2026.12	2239.44	2443.3	2066.08	1872.62	2014.47	8775.86	1613.76	3196.09	4674.27	3482.95	3186.89	2045.94	8969.72	3480.3	2619.05	2502.11	3072.18	10895.4	8358.72	1203.18	1820.46	3943.62	3179.79	5577.43	3119.56	2125.12	3809.57	3614.86	2971.16	12303.6	5629.27	2920.05	3211.8	4958.42	2773.91
1062	positive	NA	NA	Tridecanoylglycine;	-6.4295914578728;	MS1 mz matched	332.242	217.504	22510.1	22509.9	21850.8	21754.7	23152.7	23630.2	21782.2	24392.7	23953.4	27775.1	25757.8	23844.2	10427.2	20736.1	24202.7	28662.7	15299.9	12268.7	18557.6	19047.7	17170.1	30161.7	11196	22900.4	18339.3	23654	24245.5	28328.1	30907.6	12561.3	17434.7	9679.71	23425.2	16009.6	24469	24613.5	27903.8	20447	12241	22193.6	32113.3
1066	positive	NA	NA	Trichlorot	2.71136	MS1 mz matched	332.951	352.445	135580	135238	132667	144766	151638	146168	130650	137842	146770	138528	126678	139218	157622	151381	137980	126894	151733	145556	149424	150862	137731	149575	146108	138648	146258	140887	148500	133802	134415	138340	132101	131365	136550	143755	139071	134769	135877	154339	145513	137836	139029
1074	positive	NA	NA	NA	NA	Unmapped	334.185	396.388	11060.3	8122.84	9944.08	10977.2	9612.93	11580.4	10778.7	10252.7	10376.1	9315.86	12805.8	9471.01	1876.01	15313.4	21743.5	14245.2	7961.72	5087.65	6670.11	4269.88	13854.6	7189.94	3899.09	17982.1	21258.7	9096.63	11383.7	6358.93	28698.9	5505.76	17268.5	5912.5	11292	4665.72	11979.4	10952.3	1962	7833.71	8116.31	6904.74	15206
1094	positive	NA	NA	Pipericine;	18.9766377048335;	MS1 mz matched	336.325	35.5545	109919	89064.2	107442	103980	102021	108982	104728	97350	103904	106642	103742	14961.9	18346.2	51343.8	94285.8	112048	89362.8	81726.7	81747.3	180740	61298.9	146175	105833	77985.3	124125	99678	52830.4	56905.2	92980.7	79752	60809.7	131977	78736	103626	82154.9	178515	99711.5	110779	75623.8	77339.7	64967.2
1107	positive	Erucamide	0.9803	NA	NA	MS2 forward	338.341	34.0925	392951	415266	465730	378732	465047	415528	455322	404256	465691	475079	530817	253053	211510	184412	473281	460949	315760	335074	142868	389406	212486	440270	487442	689278	283845	320325	337954	514536	466161	323718	425336	307508	510806	425458	267958	434725	526985	328514	689264	468164	275857
1115	positive	NA	NA	3-O-p-Coumaroylquinic acid;Hydrojuglone glucoside;alpha-Hydrojuglone 4-O-b-D-glucoside;	-24.5337624476174;-24.5337624476174;-24.5337624476174;	MS1 mz matched	339.3	34.9595	15455.9	11455.9	12468.7	16408.2	15517.5	17296.8	15379	14472.3	14991.9	15443.1	15730.4	54997.7	52030.6	44287.2	16754	19422.1	16850.4	12891.6	15802.3	21207.5	11999.1	25837.6	18290	14728.8	15251	21481.6	22666.5	13509.1	7381.27	11376.9	11421.1	23337	17878.4	18965.4	17438.3	20943	12818.7	22744.8	12570.6	10458.3	15595
1125	positive	NA	NA	3-O-(4-O-Methyl-a-D-glucopyranuronosyl)-L-arabinose;3'-Ketolactose;4-O-beta-D-Glucopyranuronosyl-L-fucose;2-O-(4-O-Methyl-a-D-glucopyranuronosyl)-D-xylose;2-O-a-D-Galactopyranuronosyl-L-rhamnose;4-O-(4-O-Methyl-alpha-D-glucopyranuronosyl)-L-arabinose;Cellobiono-1,5-lactone;Cellobiose-1,5-lactone;Cellobionolactone;3-Ketolactose;3-Ketosucrose;3-Dehydro-alpha-D-glucosyl-beta-D-fructofuranoside	9.56915152572004;9.56915152572004;9.56915152572004;9.56915152572004;9.56915152572004;9.56915152572004;9.45594864289074;9.45594864289074;9.45594864289074	MS1 mz matched	341.104	254.464	12952.2	8344.55	7475.31	11198.2	10327.6	10302.5	9840.24	11536.6	8854.75	10115.7	8398.34	5971.56	11683.4	14949.3	6858.44	8723.98	8090.32	9357.01	15038.1	7077.45	10716.5	11315.2	17840.6	10023.8	9732.74	13170.7	14791.8	4638.94	8004.14	16793.8	11067.4	18777.5	16146.4	10940.8	12957.9	12652	20339.3	19287.1	6950.52	7124.52	8205.66
1128	positive	1-Stearoyl-sn-glycerol	0.7571	NA	NA	MS2 reverse	341.305	35.3275	23704.5	21393.8	28749.9	24899.5	25762.6	23594.3	19398.5	27683.7	25928.3	29283.5	27642.5	1054.44	5360.26	2043	4697.86	7103.35	5101.71	2245.82	3014.19	4782.05	3486.92	4709.85	3789.28	2355.74	3550.28	2245.64	4710.62	2999.52	2492.39	6289.38	1984.78	4710.05	6046.5	2408.46	1330.99	2441.69	1608.28	4006.79	1965.31	3337.89	2021.3
1134	positive	NA	NA	trans-2-Dodecenoylcarnitine;	19.4394066834618;	MS1 mz matched	342.263	180.434	40761.3	42248.7	35177.1	39447.6	36653.9	32325.3	33804.7	33725.2	40556.2	46326.5	37311.9	45032.5	18406.5	17215	40738.4	60465.8	22962	21094.1	40900.5	20428.4	32919.7	86646.9	28873.6	44774.5	22656.7	44254.6	28237.2	38774.1	18941	27365	52561.9	18378.4	38328.9	26466.8	33370.8	47262.7	53412.8	30395.6	8948.51	32449.5	64432.2
1136	positive	NA	NA	Tryptophyl-Histidine;Histidinyl-Tryptophan;	22.0880448142439;22.0880448142439;	MS1 mz matched	342.372	136.045	21386.3	19466.1	18315.2	18729.7	20638	22795.4	22425.9	22302.1	24444.6	21404.9	24537.9	7382.82	103948	8057.29	9176.54	11070	27713.2	47658.6	20660.7	26461.5	53932.4	29268.8	127938	11587.3	36040	7869.76	42147.9	12293.7	5793.36	12572.5	13034.8	42546.7	11412.5	49886.4	29494.6	18833.4	42103.6	5626.04	20374.8	32763.9	12814
1147	positive	Donepezil	0.909	NA	NA	MS2 reverse	344.206	338.248	6447.71	5535.26	6487.22	6480.18	6363.02	6332.9	5968.36	6200.32	6404.41	6073.79	5914.26	9543.89	1806.67	3014.64	17798.4	11256.9	5336.03	2081.47	3298.71	1848.29	7392.15	4185.65	2508.82	6170.79	7322.73	4159.69	5089.9	3603.84	18678.7	4331.05	5846.15	2889.56	4394.42	3318.77	5738.76	4963.54	2408.79	4997.49	6447.58	8391.32	7445.6
1178	positive	NA	NA	NA	NA	Unmapped	350.325	34.373	14830.8	17340	14525.7	16023.5	10792.6	15801.1	16436.7	12227.6	17320.3	11093.2	10653.1	7097.54	22171.6	24413.9	26444.9	30395.4	29402.2	15893	42659	14799.7	18171.7	9214.73	26244.6	16020.9	8579.06	36163.5	10325.2	31974.9	15062.2	13415.8	15473.8	27309.3	10668.6	14768.2	17640.7	18710.2	9505.3	54055	15308	30806	9600.81
1179	positive	NA	NA	NA	NA	Unmapped	351.001	352.426	381230	350814	334927	305876	298625	274760	255156	257445	266320	236501	239938	236537	277490	263300	232385	331670	264128	344308	315570	323878	295516	263801	274298	337969	313742	281592	239325	236750	370431	362040	242238	342618	242430	267875	246712	340489	352100	281924	236447	274440	355365
1191	positive	NA	NA	8-Hydroxy-R-acenocoumarol;6-Hydroxy-R-acenocoumarol;7-Hydroxy-R-acenocoumarol;	2.97840735896251;2.97840735896251;2.97840735896251;	MS1 mz matched	352.32	35.2575	91897.1	102038	97961.4	85941.4	100170	97996.8	105468	107291	92091	102499	104889	15964.9	25417.4	76153.7	119033	110304	84991.3	72076.4	77365.4	129980	69317.5	119446	108267	92531.6	108522	100395	72393.1	67397.3	89200.2	90271.6	61627.6	108709	59948	97294.3	90814.2	145379	74440.1	120822	83601.7	67569.1	57366.5
1200	positive	NA	NA	Olopatadine n-oxide;Melosatin A	-5.12768421731202;-5.10446557622177	MS1 mz matched	354.161	328.088	7121.49	6696.63	7015.65	6586.33	7054.09	6593.36	6396.12	6031.07	6100.06	6230.64	6035.11	6819.97	12652.1	3439.1	1136.82	6834.41	4534.85	1270.79	4387.98	4421.41	847.346	5322.22	5088.97	1584.45	6588.07	1226.79	4594.95	920.61	1299.88	7996.9	855.533	1653.32	1399.41	5122.38	2170.54	6932.27	23658.2	12860.1	1223.05	1624.44	2393.28
1204	positive	Phytanic acid	0.64	NA	NA	MS2 reverse	354.336	34.935	42129.6	47351.3	43431.5	44491.3	48133.7	42939.2	47347.1	49366.5	45500	42475.5	48065.8	5980.07	7969.41	27934.5	52829.8	49946	47550.3	27778.7	43926.8	50594.5	27267.2	56132.7	39316.7	45520.7	50257	45336.7	30153.5	29558.3	36317.8	45068.9	28509.3	47572.1	39312.2	48270.1	46305.8	67047.1	39980.1	55825.6	31972.8	40717.6	27150.8
1213	positive	NA	NA	Gomphidic acid;	14.7737269411902;	MS1 mz matched	355.284	35.652	15853.9	12534.5	9347.89	14301.5	18188.7	14750.4	16849.5	14943.1	15147.8	14549.9	13549.5	4019.55	1976.21	12547.1	5236.02	15640.2	5901.75	11303.2	7046.61	7957.06	6248.53	4264.04	4997.3	6609.41	15138.7	7101.75	8581.55	8787.64	5012.08	12044.4	4612.04	7086.81	6139.95	7883.92	13847.6	5701.78	4167.76	8508.59	5249.71	2820.53	6013.89
1222	positive	NA	NA	NA	NA	Unmapped	356.351	64.775	48518.1	48499.4	52962.9	52800.6	55838.1	67574.4	50715.7	43026.9	44395	41885.6	42694.4	7189.27	4099.08	7470.01	17737.6	19837	10273.5	10804.3	13897.5	16937.9	9509.32	16989.1	14404.7	11095.8	11490.4	9931.71	7147.34	8621.68	7624.87	11282.1	5615.7	9876.77	6618.65	7397.26	11443.6	12933.9	10641.9	16418.1	9605.44	9947.85	12561.8
1223	positive	NA	NA	NA	NA	Unmapped	356.912	352.452	24553.7	29951	29342	28443.3	33765.6	32330.3	29443.5	30694.7	31432	35525.2	29059.4	30932.5	30979.3	29079.8	27288.5	34656.5	35290.3	28159.3	30083.7	27081.8	32216.1	35052.9	34396.7	27635.3	30129.5	30291.1	32141.1	31649.2	25543	28201.7	34746.1	25072.7	30530.9	35349.3	32843.7	28153.7	27517.2	30070	32937	32267.2	27024.8
1229	positive	2'-O-methylguanosine	0.9976	NA	NA	MS2 reverse	358.142	212.458	4596.28	5057.27	4918.4	5325.68	6572.8	5894.14	5253.05	8086.02	6725.44	6040.07	6958.49	5638.22	743.605	2654.5	6320.82	836.797	964.667	16506.1	751.972	6864.67	23471.2	983.443	4276.31	636.349	9934.65	670.465	876.607	19378.2	14731.5	964.177	825.24	997.951	1029.11	1018.72	8834.62	7268.2	840.953	946.257	17066.3	8533.97	3685.53
1230	positive	NA	NA	Leucyl-leucyl-norleucine	-13.0672	MS1 mz matched	358.258	198.174	24429	24224.8	25167.5	25063.3	25044	24523.2	24261.3	25553.4	23708.2	22983.2	24272.8	12124	11479	14165.9	69916	23575.9	7602.76	17763.2	10779.3	18755.2	11100	23240.9	3066.48	47879.8	20147.2	29560.7	22966.7	51910	86487.3	9062.58	7515.58	5862.92	9452.02	20457.8	35075.3	18472.4	11880.3	18366.1	16350.2	7935.73	32422.5
1233	positive	Behenic acid	0.6081	NA	NA	MS2 reverse	358.366	139.662	3094.55	3722.72	3248.48	4970.42	4755.43	4356.43	3111.82	3137.38	4507.14	2709.45	5796.32	411.991	6137.73	619.797	0	1406.53	2230.26	2068.88	1021.36	1206.58	3920	1648.16	5771.85	1023.38	2073.4	619.549	4128.31	206.042	407.404	1804.74	623.919	2291.3	1208.45	3682.72	2066.07	1660.45	4134.73	414.577	1234.87	1448.24	1245.26
1244	positive	NA	NA	1'-hydroxytriazolam;4-hydroxytriazolam;	-22.6524246887784;-22.6524246887784;	MS1 mz matched	360.201	373.502	6493.77	6575.32	7063.56	7267.5	8689.28	8293.88	9042.24	9032.99	8408.09	7845.68	7555.94	5480.44	1412.32	16799.7	44083.4	12370.2	2481.15	1380.29	6065.68	1691.73	2060.99	2527.74	1247.19	13472.4	16079.6	3644.46	6189.44	5441.4	37670	3152.72	3730.4	2789.76	3428.28	10746.5	5297.26	5382.4	1343.52	2277.4	2057.61	5654.69	11772.8
1246	positive	NA	NA	2-Hydroxylauroylcarnitine;	17.7526824907703;	MS1 mz matched	360.274	205.34	10563.2	13130	10974.7	11345.9	11881.1	10585.4	9995.18	11939.9	10116	13307.5	11496.4	13034.8	5207.89	6817.55	13176.1	15105.1	6659.49	8174.13	8516.2	10407.5	10585	14624.6	4610.65	8089.86	8747.99	11502.6	10063.8	12797.8	9376.64	7701.85	8482.52	6273.61	10374.1	6350.7	14262.9	9777.86	8240.31	10085.6	6239.44	10486.6	15386.8
1264	positive	Hydrocortisone (Cortisol)	0.6815	NA	NA	MS2 forward	363.216	50.976	18335	23494	22893.8	27976	25231.2	19542	25965.7	14115.2	16066.5	19941.4	18072	25988	9875.94	20031.5	36366.1	49708.2	29014.3	12436.6	6888.04	12057.3	13546.5	10062.1	30060	14762.5	41604.6	6528.26	22123.6	49151.2	41258.9	5161.33	26226.3	23351.1	25020.8	11675.7	25833	19768.8	13701.3	25956.9	18352.8	19063.5	61181.4
1276	positive	Cellobiose	0.8368	NA	NA	MS2 reverse	365.105	394.18	74373.5	57846.2	59704.3	69017.2	67871.7	76287.9	88568.5	77435.5	62060.8	79229.4	70482.2	53357.1	12082.7	13771.6	31425.6	37826.1	14467.7	26002.9	20391.5	5396.65	7206.83	4847.48	10804.8	19552.4	71271.5	46005.4	42009.9	348208	563400	19640.4	14397.5	14608.8	47098.7	7300.82	85916.1	10519.5	6325.82	11995.8	229732	14570.1	21132.8
1277	positive	NA	NA	Maltulose;Isomaltose;Inulobiose;Galactinol;Sucrose;D-Maltose;Epimelibiose;Kojibiose;Glucinol;Trehalose;Sakebiose;Mannobiose;3-b-Galactopyranosyl glucose;Trehalulose;Allolactose;Turanose;beta-Lactose;Galabiose;Cellobiose;Lactulose;DEAE-cellulose;Melibiose;Neotrehalose;Glucose-1,3-mannose oligosaccharide;Fagopyritol A1;Alpha-Lactose;Sucrose;Cane sugar;Saccharose;1-alpha-D-Glucopyranosyl-2-beta-D-fr…	5.22775577378654;5.22775577378654;5.22775577378654;5.22775577378654;5.22775577378654;5.22775577378654;5.22775577378654;5.22775577378654;5.22775577378654;5.22775577378654;5.22775577378654;5.22775577378654;5.22775577378654;5.22775577378654;5.22775577378654;5.22775577378654;5.22775577378654;5.22775577378654;5.22775577378654;5.22775577378654;5.22775577378654;5.22775577378654;5.22775577378654;5.227755…	MS1 mz matched	365.105	361.036	15256.3	16316.8	14854	12355.8	15140.6	15355.2	16121.1	16535.7	17635.4	17069.5	20889.4	68480.6	14993.9	29739.9	30054.5	5393.91	8865.46	16015	9530.17	13789.9	30061.9	11180.5	5820.28	4078.51	13723.1	5171.05	12252	63626.4	85480.8	27150	35886.9	5757.18	2192.3	7146.77	7949.07	3162.33	1677.73	18815.4	13300.9	21269	7446.35
1280	positive	NA	NA	Fludarabine;Benzoylprop-ethyl	-9.71605801099811;-22.9672300795219	MS1 mz matched	366.05	310.803	38362.6	42134.5	41664.4	43355	41487.6	42131.2	42552.8	44367.8	42453.5	40586.7	42875.8	33555.5	51553.5	37551.1	26989.2	28758.3	46337.3	46943.3	45055.5	43046.9	40693.5	41834.7	44107.1	44750.9	41050.4	48563.2	38660.2	38975.9	30094.2	37639.3	49029.3	40327.4	45047.7	42374	39179.8	41198.1	44682	41742	36626.8	26780.1	39705.4
1283	positive	N-Acetyllactosamine	0.9906	NA	NA	MS2 forward	366.139	515.061	4910.52	4969.32	5370.26	4923.17	5433.19	5207.31	5209.3	5404.58	6583.46	5892.15	6302.89	7985.36	9072.31	7268.3	8338.1	9147.47	11217.9	1634.75	8034.26	7492.18	8305.51	5232.19	10158	13146.6	7012.39	11812.2	6806.19	5996.98	8740.16	10419.6	7520.31	8707.87	5728.38	8705.21	11289.4	10613.3	4477.01	6269.11	4994.68	9088.91	5128.51
1287	positive	NA	NA	NA	NA	Unmapped	366.372	33.807	5699.97	7957.67	7830.43	6045.13	7767.67	9183.86	9418.04	5958.94	7623.27	8175.28	9863.82	3961.66	2940.51	2344.62	7506.21	7353.31	3423.05	6725.06	1906.95	5649.44	2312.19	9164.75	7272.3	10656.2	3761.43	4037.28	5298.06	8848.22	7581.62	5534.66	6788.31	7857.96	8069.41	4534.68	4761.24	7976.01	5321.46	4780.84	10870.3	7658.86	4617.24
1292	positive	NA	NA	Phosphoribosyl formamidocarboxamide;Fumigaclavine C	1.40696480523853;-24.2599528657732	MS1 mz matched	367.222	226.89	2061.57	2349.72	1836.65	2401.34	1943.46	2263.89	2289.12	2011.56	2548.09	2032.39	2295.4	1306.97	1345.02	3944.8	2553.3	715.625	1521.97	3094.78	654.747	1663.93	1130.4	1025.64	1016.52	3020.42	996.47	2873.21	1515.7	2216.25	5028.5	1747.41	1862.98	987.828	1145.87	960.393	3299.91	4732.26	935.239	1511.53	1091.22	827.219	1622.42
1302	positive	NA	NA	3, 5-Tetradecadiencarnitine;	17.186575964957;	MS1 mz matched	368.279	176.419	22896.5	25712.9	24797.3	41624.6	25972	26116.5	25024.1	25094.4	30871.5	33707.8	26404.3	25427.7	12213.6	16355.2	24362.2	72954.1	13895.7	19790	20843.8	14554.3	18152.8	86133.9	19836.1	25625.1	14248.1	25354.9	35057	24969.3	7674.29	13664.9	52912.7	8836.3	29747.9	21099.1	41625.7	39065.3	41258.4	36632.2	9222.15	19107	40443.3
1307	positive	NA	NA	12alpha-Hydroxyerosone;Decarbamoylgonyautoxin 1	-23.3717549536665;16.3010256062722	MS1 mz matched	369.088	259.758	4481.1	4677	4623.37	4347.88	5098.48	4655.02	4631.86	4552.44	4406.78	4319.04	4625.4	4426.45	5526.52	4807.51	3136.29	4648.83	4073.53	3880.22	4468.38	3660.98	3036.55	4120.81	4955.91	3685.93	4551.84	4821.59	4464.5	3607.23	3576.05	3390.61	6032.23	4394.78	3844.41	5225.22	5790.97	4610.94	5032.6	6132.05	3054.57	3576.26	4354.99
1318	positive	Lathosterol	0.7641	NA	NA	MS2 reverse	369.35	33.0055	17593.3	16372.8	16736.9	17431.5	15572.1	16901.1	18218.6	19331.1	17501	22018.5	24840.4	17904.6	14478.7	19789.8	13458.8	19167.3	23131.1	13893.4	21425.5	17199.7	17547.4	30462.1	24538.9	15493.6	16939.7	19261.2	21327	12163.8	9976.51	15328.3	21865.4	22172.1	20085.4	20788.7	17406.3	26879.6	20808.2	27263.9	14025.4	19067.1	24802.8
1340	positive	MG(16:0)	0.7518	NA	NA	MS2 reverse	372.31	173.898	24617.6	32883.9	25437.7	30121.5	16710	23340.6	22056.4	24712.8	21009.5	25270.8	20356.8	12125.3	28337.6	11912.2	22553.5	22212.7	8441.26	16497.3	37384.7	7126.58	17754	21066.2	12290.1	24688.3	26343.6	28371.6	23071.5	17280.4	15020.6	21432.8	30629.8	18091	35000.4	23861.3	14036.8	33318.5	18821.6	31020.5	9423.74	9148.36	39689.3
1344	positive	NA	NA	(-)-Arctigenin;Hydroxymyricanone;9-Hydroxy-3',4'-dimethoxy-3,4-methylenedioxy-9,9'-epoxylignan;Tetrahydrocurcumin;(8R,8'R,9S)-9-Hydroxy-3,4-dimethoxy-3',4'-methylenoxy-9,9'-epoxylignan;Licoriphenone;6',7'-Dihydroxybergamottin;2-(4-Allyl-2,6-dimethoxyphenoxy)-1-(3,4-methylenedioxyphenyl)-1-propanol;Arctigenin;(-)-Arctigenin;Fargesone A;Kadsurin A	6.07015145691368;6.07015145691368;6.07015145691368;6.07015145691368;6.07015145691368;6.07015145691368;6.07015145691368;6.07015145691368;6.03925035720516;6.03925035720516;6.03925035720516	MS1 mz matched	373.159	299.375	5035.5	4092.7	3814.04	4906.97	5433.53	5055.33	5260.37	5723.4	4927.89	5774.78	6697.02	10771.1	263.855	4017.79	2695.3	443.31	413.725	19394.4	1601.25	4456.32	12290.1	203.833	20082.4	281.181	7732.2	232.457	494.43	11608.9	20261.9	664.02	316.779	1298.84	275.542	273.717	5952.84	12164.8	413.742	195.783	9200.16	26630.8	2404.52
1351	positive	NA	NA	Dodecanedioylcarnitine;Curacin A	16.9977617729145;23.7974526415733	MS1 mz matched	374.253	311.106	1858.43	1903.82	1718.9	2349.22	1618.19	1762.64	1739.66	1553.16	1747.88	1714.16	1705.34	3293.61	498.37	575.675	3376.28	4388.2	1158.18	880.312	1143.87	781.077	1666.03	1734.45	587.076	2070.31	1964.07	1449.25	1250.73	1169.3	6051.51	842.487	4493.79	967.065	1701.25	709.549	1461.15	1296.47	709.8	774.321	1042.42	2635.34	6053.45
1353	positive	NA	NA	Deferasirox;	1.10711306070498;	MS1 mz matched	374.362	70.7885	13674	13235.9	12758.4	13140.9	12421.9	13581.5	13349.9	11821.9	15112.9	12467.2	11211.4	2789.8	1001.73	5618.65	14751.5	16753.3	7944.61	13227.8	8540.07	13454.7	7197.38	13718.5	7517.99	9158.61	11029.6	9336.67	5176.69	7336.14	7160.87	11069.3	3243.09	8080.27	3374.49	5454.86	7673.67	10140.6	5134.9	10205.2	8031.59	7404.73	10649.2
1355	positive	NA	NA	Halacrite	22.8344	MS1 mz matched	374.962	352.403	429071	425599	394818	370511	387679	373894	319962	338816	329302	343033	308590	326512	389707	364632	333685	372121	353864	413529	400363	415414	369095	374376	372464	418358	407901	372851	335656	339288	414993	404845	345421	400192	345087	385094	343217	384530	415943	387914	350724	361466	412100
1369	positive	NA	NA	NA	NA	Unmapped	376.787	321.079	9319.91	8945.74	9705.39	8599.45	8107.73	7998.64	8036.47	8627.86	7915.52	6760.44	7600.38	7205.44	12077.8	8454.42	5136.6	7333.5	5923.77	14724.2	8052.42	7616.77	9345.63	7070.59	10936.8	11692	7266.38	8224.38	8805.12	6300.81	7361.98	8982.63	14307.6	8209.25	7589.64	9023.72	10186.4	7918.63	8785.67	8169.51	5923.34	5908.1	10040.4
1389	positive	NA	NA	Donepezil;	-23.4040702982407;	MS1 mz matched	380.206	319.986	4016.13	4149.36	3617.64	3586.57	3276.79	3328.5	3602.82	3469.83	3203.93	3007.26	3494.17	4815.53	757.032	414.829	707.825	761.956	1957.04	1956.48	516.148	16314.8	1930.35	603.355	698.381	436.032	1800.19	3747.42	15656.1	1289.04	631.998	1240.37	1903.34	3754.42	1050.47	12204.1	1510.59	829.63	490.756	457.646	20486.5	2332.76	1355.15
1390	positive	Sphingosine 1-phosphate	0.9685	NA	NA	MS2 forward	380.255	277.413	3653.84	3564.09	3091.37	3229.88	3370.57	3054.97	3143.6	3361.07	3000.63	3712.11	3248.46	3571.16	5847.67	4748.91	3330.8	2195.64	3171.02	2641.27	4318.75	3530.63	3248.05	4173.84	4045.46	3456.46	2804.13	4310.08	4381.54	4198.56	4188.58	4678.85	5154.23	3404.35	6039.21	3489.9	4062.91	3683.74	2758.88	3624.93	3501.28	3396.18	3014.09
1395	positive	NA	NA	Maltulose;Isomaltose;Inulobiose;Galactinol;Sucrose;D-Maltose;Epimelibiose;Kojibiose;Glucinol;Trehalose;Sakebiose;Mannobiose;3-b-Galactopyranosyl glucose;Trehalulose;Allolactose;Turanose;beta-Lactose;Galabiose;Cellobiose;Lactulose;DEAE-cellulose;Melibiose;Neotrehalose;Glucose-1,3-mannose oligosaccharide;Fagopyritol A1;Alpha-Lactose;Sucrose;Cane sugar;Saccharose;1-alpha-D-Glucopyranosyl-2-beta-D-fr…	-0.618210984820426;-0.618210984820426;-0.618210984820426;-0.618210984820426;-0.618210984820426;-0.618210984820426;-0.618210984820426;-0.618210984820426;-0.618210984820426;-0.618210984820426;-0.618210984820426;-0.618210984820426;-0.618210984820426;-0.61821	MS1 mz matched	381.079	394.216	10591.5	9874.32	11398.3	10905.8	11634.6	11875.2	12295.2	14757	13632.8	17066.2	19448.8	10377.5	5124.63	2569.63	5227.09	6290.3	4314.39	5203.48	3539.98	1873.84	1516.77	2478.08	2492.77	4117.02	11862	9080.82	8903.1	40020.4	42676.7	3141.9	4560.63	3622.94	8715.82	1597.22	14804.5	3232.02	1857.2	1304.86	35116.4	2216.62	3674.5
1404	positive	NA	NA	NA	NA	Unmapped	382.056	343.022	3186.54	3871.56	3817.32	4531.89	4181.19	5045.63	3883.89	4379.54	4368.49	4108.41	4412.9	5614.04	5241.37	5209.85	6739.04	6962.52	7080.94	3922.58	6135.65	5437.32	3543.37	5568.92	7407.29	5097.3	5996.27	6074.09	6046.41	2659.98	4154.18	5286.61	2973.11	975.072	7574.27	5354.93	2840.04	6151.14	3545.02	4998.86	4328.88	6611.73	1221.3
1418	positive	25-hydroxyvitamin D3	0.6508	NA	NA	MS2 reverse	383.329	33.206	8220.8	7836.21	7570.58	7802.69	7099.34	6827.67	10675.6	8750.31	7859.63	6666.62	7220.14	8510.11	8916.64	6458.84	14195.8	9563.95	7125.59	10096.4	11127.5	6145.17	8879.57	6006.32	8093.72	9739.3	6567.29	9431.6	11868.8	8005.33	6198.91	8925.05	7966.03	9352.72	9662.34	6998.41	7378.47	9025.59	5767	8687.9	5871.9	9923.88	8776.52
1435	positive	NA	NA	3-Hydroxy-cis-5-tetradecenoylcarnitine;3beta-(1-Pyrrolidinyl)-5alpha-pregne-11,20-dione	16.7118165148786;-22.9376271229931	MS1 mz matched	386.289	197.603	23670.2	22818.4	16058.2	14580.5	21085	16045.1	15570.6	18796.8	15881.4	14380.7	21798.2	24895.2	6518.05	10328.6	30080	30101.8	14145.2	8934.53	14076.1	15811.3	18323.4	23292.5	8246.61	17011.5	13490.8	15677.6	14670.4	13661.5	13596.1	9363.5	15885.1	9426.79	12304	19252.4	20848.9	27979	8522.89	15057.8	5983.87	11888.3	35272.1
1440	positive	NA	NA	Porson;Gingerenone B;Isogingerenone B;Burseran;(+)-Burseran;(+)-Eudesmin;Pinoresinol dimethyl ether	2.74850952481818;2.74850952481818;2.74850952481818;2.84846502680859;2.84846502680859	MS1 mz matched	387.179	37.607	318994	387707	366094	334711	315483	362526	427215	448334	342844	354054	512190	228798	420051	336854	976700	246693	522523	498357	478896	463169	1309387	754144	375273	971600	662704	278556	1363896	365650	350536	1342061	1693415	257496	258424	1563108	1690258	1204933	244202	269262	654552	285631	588580
1443	positive	NA	NA	dCDP;Nemopride	8.94640529254741;23.4104129643047	MS1 mz matched	388.18	394.796	4519.04	3832.58	4051.07	4300.03	4535.55	4778.08	4757.2	4726.17	4345.68	5225.26	7191.54	4158.06	1512.06	1531.07	2053.96	3028.09	1335.66	1780.99	1322.6	1442.52	1214.92	983.273	989.573	1818.94	4576.14	2980.14	2683.76	23481.8	50602.2	1824.68	1269.19	1489.75	2867.32	960.407	6519.83	1483.02	1246.11	1082.63	15931	1177.39	1252.06
1460	positive	NA	NA	Petunidin;Petunidin;Petunidin chloride	-8.46648817626558;-8.52187992683326	MS1 mz matched	390.993	352.44	33729.2	25809.3	28417.7	25231.3	25065.6	25742.3	23358.6	25148.5	24149.8	24176.9	23588.3	25532.3	28694.3	25269	25981	28478.2	25084.8	29481.9	29619.8	26274.5	24781.2	24498.2	23635.9	30091.6	28253.8	27091.8	21985.6	26026.3	28636.9	29750.5	25389	28219.7	25669.5	26381.3	24542	29906.8	32231.7	27483.8	24471.7	22672.2	29797.6
1462	positive	NA	NA	NA	NA	Unmapped	391.101	297.856	126130	88729.9	89704.6	130875	133597	103429	130129	94813.1	101293	124240	121785	141729	42935.9	133592	111420	80955.3	142998	76137.8	94399.4	136305	141609	95365.2	58411.9	150778	50773.9	127264	161148	116987	50821.5	117189	8122.95	145354	171321	39411.7	119589	120608	141982	152416	172934	127375	58822.5
1463	positive	NA	NA	Nutriacholic acid;9'-Carboxy-alpha-chromanol;7-Hydroxy-3-oxocholanoic acid;D8'-Merulinic acid A;7a-Hydroxy-3-oxo-5b-cholanoic acid;12-Ketodeoxycholic acid;Bis(2-ethylhexyl)phthalate;Di(2-ethylhexyl)phthalate;Dioctyl phthalate;DEHP;3alpha,12alpha-Dihydroxy-5beta-chol-6-enoate;Di-n-octyl phthalate;Bis(n-octyl) phthalate;Dioctyl 1,2-benzenedicarboxylate;Diisooctyl phthalate;Apocholic acid;3alpha,12a…	16.3703255820304;16.3703255820304;16.3703255820304;16.3703255820304;16.3703255820304;16.3703255820304;16.3951801310127;16.3951801310127;16.3951801310127;16.3951801310127;16.3951801310127	MS1 mz matched	391.283	31.8695	40641.4	40556.3	40933.6	32187.9	39969.6	38000.1	38280.8	35117.6	34910	41388.1	38417.5	41646.1	18029.3	31583.9	75766.4	42424.3	58761.7	15812.2	44108.4	56041.3	47453.5	90561.8	30985	52466.8	19333.7	35333.4	57454.3	108129	27728.8	35741.9	24952.3	65767.9	19231.5	65210.9	197200	23698	10555.4	40246.6	50648.1	28189	36747.8
1486	positive	NA	NA	Ciprofloxacin;	-4.527051395679;	MS1 mz matched	395.359	34.429	11527.7	10548.3	14050.6	12511.5	13892.2	11642.4	10281.7	12079.2	13130.4	10621.5	10980.5	6284.42	10417.6	7572.88	16510.8	15424.4	13943.3	12126.7	22511.8	9458.72	9055.72	9513.61	22183.3	17963.4	10601.2	18468.1	8501.64	22914.4	10390	15585.6	11542.1	14797.8	10206.1	13446.7	14396	14287.3	10640.1	22687.2	13000.3	15404.2	7310.17
1487	positive	NA	NA	(Z)-N-Feruloyl-5-hydroxyanthranilic acid;Desulfoglucotropeolin	-11.9639027358134;-22.1821592842715	MS1 mz matched	396.042	343.687	36621.5	37439.5	35404.9	30077.8	33482.5	30894.1	25749	26045	30180.6	30347.4	32253.1	15932.6	514.303	23253.2	7714.07	1637.84	751.682	8172.12	7626.41	3275.04	49283.4	1380.82	672.217	3032.8	11753.5	13915.4	5632.85	140232	42254.1	9787.45	30094.6	182203	1416.48	574.264	91557.1	14556.6	4994.95	2455.44	18236.4	3676.95	62889.6
1497	positive	NA	NA	4-O-Methylmelleolide;Clausarinol;Eplerenone;Armillarin;Armillaripin;Magnoshinin;Eplerenone;Estra-1,3,5(10)-triene-3,6alpha,17beta-triol triacetate;Estra-1,3,5(10)-triene-3,6beta,17beta-triol triacetate	-0.57628574917635;-0.57628574917635;-0.57628574917635;-0.57628574917635;-0.57628574917635;-0.482853626319191;-0.482853626319191;-0.482853626319191;-0.482853626319191	MS1 mz matched	397.2	35.909	19844.9	19279.6	22145.6	19233.9	17833.2	19150.9	19134.2	18761.2	18897.8	18780.9	22425.1	5639.01	7211.95	6027.42	10253.9	5876.17	6911.93	7134.41	6136.83	5332.93	11091.7	8510.2	8062.96	8340	8714.98	10064.6	12207.2	5298.61	7617.35	15024.4	10874.2	6155.38	5330.46	12909	12097.6	14823.1	7412.81	8215.75	6991.15	9953.21	8782.82
1502	positive	Histidinyl-Lysine	0.9526	NA	NA	MS2 reverse	398.032	292.288	1962.44	1568.58	1790.74	1639.49	1898.54	1813.53	1745.21	1816.5	1619.51	1639.21	1601.2	1641.37	2393.86	3050.73	1287.85	1225.79	1530.57	2372.4	1229.63	1153.08	1738.97	1430.83	1364.79	1235.05	2058.81	1769.76	2234.5	1978.45	2039.75	1941.51	3809.81	1445.69	2880.96	1566.99	1779.33	1711.88	1593.58	1796.78	1188.18	1244.34	2077.89
1508	positive	NA	NA	9-Hexadecenoylcarnitine;trans-Hexadec-2-enoyl carnitine;Solanidine	16.1723680382859;16.1723680382859;-22.3124534240085	MS1 mz matched	398.326	170.635	19241.8	20341.2	26210.9	31316	26647.7	21302.1	22297.3	29876.8	22286.2	23933.8	21816.1	20444	19051.6	14467.3	35465.9	51680.5	8648.04	13513.3	22537.5	14263.6	25260.6	35022.8	10426.4	24470.1	18338.4	23070.9	16133.5	18469	19687	29560.9	40774.6	10924.4	29714.7	29672.9	10716.3	18344	15916.4	24885.8	8033.14	14761.9	40313.6
1510	positive	NA	NA	Phenkapton	-7.7141	MS1 mz matched	398.923	352.44	166358	163275	162276	160374	165652	178912	147717	170690	160765	163596	155398	158023	180467	174625	165196	160110	173811	170736	172133	155557	171113	167836	179348	160611	173808	167846	172581	168429	153697	159222	161956	153363	169896	161155	161351	155525	151223	171700	182152	159194	173406
1521	positive	NA	NA	NA	NA	Unmapped	400.268	291.371	1438.69	1451.06	1431.77	1377.69	1807.87	1904.96	1635.04	1634.73	1481.93	1529.35	1638.55	3154.01	425.704	925.669	3322.87	7643.81	1508.32	478.465	1470.66	734.95	2198.96	2475.36	612.991	1104.46	1903.96	1282.65	713.106	801.356	5740.37	659.487	2544.05	664.869	635.668	620.752	1137.54	810.686	419.784	772.253	737.799	6751.7	3614.62
1525	positive	L-Palmitoylcarnitine	0.9873	NA	NA	MS2 forward	400.341	169.967	67704	68551.9	85662.2	90582.4	80668.9	64680.4	87880.1	87353.7	68096	60877.8	67381.1	56492.2	125352	61894.2	149770	43306.7	33941.6	56540.6	105905	27235.7	54477.1	71311	63593.8	91130.9	89526.7	73188.3	65269.4	78133.9	54290.3	78033.9	108273	56845.5	65915.9	80843.9	46545.1	67880.8	54314.1	75013.5	28895.7	43183.4	145897
1547	positive	NA	NA	Inositol 1,3,4-trisphosphate;Inositol 1,4,5-trisphosphate;Pyrazoxyfen	-18.0911202116092;-18.0911202116092;5.47190450621122	MS1 mz matched	403.072	253.024	2767.51	4710.44	5498.67	5491.93	5813.76	6294.59	7225.4	6578.72	6842.91	6672.32	6109.93	7282.78	6470.23	5524.35	6847.75	5360.8	7891.24	5971.27	5512.77	5739.6	3960.82	4053.7	5885.46	4367.32	7089.06	5347.16	5583.48	7220.09	9129.42	4563.54	7662.95	5098.25	3788.04	6900.03	6763.7	3831.79	3817.07	5384.76	6679.58	4664.48	5335.2
1556	positive	NA	NA	Azoxystrobin	12.8995	MS1 mz matched	404.13	380.841	2034.69	1898.78	2123.85	1922.72	1628.05	1432.27	1746.48	1973.98	1844.99	1557.25	1952.23	1298.6	6202.56	2515.62	1243.86	927.401	2033.15	1862.27	1710.17	1623.12	1579.3	1655.1	2062.05	1901.36	3159.72	1837.21	1491.27	1015.02	1473.62	1598.91	3143.8	1846.46	2448.89	1736.27	1375.83	1707.76	3236.49	2362.58	774.444	1159.45	1976.45
1567	positive	NA	NA	(-)TAN-67;(+)TAN-67	-14.2363684591912;-14.2363684591912	MS1 mz matched	405.209	37.823	42265.9	39412.9	36033	37435.7	34935.8	36701.1	47975.5	54576.2	40230.2	36722.2	53513.8	24689.5	41712.5	34346.5	98748.8	26467.2	56598.6	59138.9	50076.9	52446.1	121874	77927.5	42677.6	104386	75651.1	28705.1	114336	40077.9	29793.9	128627	158598	27977.1	31706.5	128241	164616	123320	28865.4	28112.9	51839.1	31611.8	58395.4
1574	positive	NA	NA	7-Chloro-3,4',5,6,8-pentamethoxyflavone;	-16.9056468681851;	MS1 mz matched	407.075	297.94	37566.3	26179.2	27472.6	38464.5	38421.1	33488.9	39007.1	30693.8	33662.3	42675.6	44531.8	45718.8	19985.3	41947.6	33684.2	27325.1	42299.9	27322	23820.9	37240.5	37340.6	31712.6	24995.9	41516.7	19214.4	32167.9	45261.7	32541.9	17929.8	34833.2	2841.99	40668.5	43660.9	23596.1	43663.5	34218.1	31093	41293.2	42232.4	37448.6	20435.3
1589	positive	NA	NA	Q;Queuosine;Linustatin	4.67405009874696;4.67405009874696;7.96887748373198	MS1 mz matched	410.162	342.646	3649.5	3439.54	2499.5	3672.21	3251	2641.03	2810.93	2412.09	2446.74	2347.8	3021.83	3179.61	4353.48	2960.28	2852.25	5390.68	3939.75	2712.73	3754.86	2618.88	1389.79	3797.2	3312.53	4343.02	3693.45	3853.46	2940.95	2105.62	4208.16	2981.13	1806.18	2213.97	4455.76	2892.48	2132.31	4330.93	2813.93	5458.4	2176.34	3260.29	1066.98
1600	positive	NA	NA	LPA(P-16:0e/0:0);Stanolone benzoate;Dihydrotestosterone benzoate;DHT benzoate	9.06661832695983;3.04374778689857	MS1 mz matched	412.284	244.174	32668.6	33450.9	32341.6	30924.5	36747.9	33527.7	35309.1	41299	46248	39230.5	51606.6	29635.7	14548.7	11188.9	16755.6	18769.1	101529	3273.89	7391.49	31630.2	15403	15884.1	5238.07	5785.47	34941	29091	68575.6	5528.83	8104.66	2986.11	1938.77	12199.5	16281.8	4005.03	7210.42	10474.6	2023.41	15224.6	12878.1	339421	4943.74
1601	positive	NA	NA	3-Hydroxyhexadecadienoylcarnitine;Cyclopamine	15.1829097768954;-21.83708538519	MS1 mz matched	412.305	194.409	6256.13	6075.25	5600.94	4855.18	5168.12	5760.8	5541.95	6142.6	5831.11	5487.28	5726.3	4480.6	2772.59	2855.41	6487.48	9265.77	3965.49	5329.62	5767.3	4155.93	5873.43	12124.8	4918.2	3017.58	4922.3	5285.32	5959.48	7815.66	3613.66	4015.52	8424.74	1834.61	7908.39	4654.05	5657.11	5337.68	5193.24	8386.28	4118.9	4079.49	7283.05
1607	positive	NA	NA	dIDP;GF 109203X;Bisindolylmaleimide I	19.7510491900227;11.5022610621078	MS1 mz matched	413.195	35.9155	9546.98	9676.33	10713.8	10135	7274.45	8670.01	9422.76	10239.9	7926.57	8942.4	11429.8	3389.56	3452.45	5390.72	497.812	3554.29	6296.84	7458.08	5862.28	2034.92	8028.12	4348.49	5121.43	6422.83	7129.6	5956.96	8827.15	4566.6	2139.62	14495.4	8654.89	5067.52	3933.65	8898.17	16121.3	10527.6	4708.42	5060.64	3938.86	7251.3	12224.7
1619	positive	NA	NA	Chenodeoxyglycocholic acid;Deoxycholic acid glycine conjugate;Chenodeoxycholic acid glycine conjugate;Glycoursodeoxycholic acid;Glycodeoxycholate;Glycodeoxycholic acid;3alpha,12alpha-Dihydroxy-5beta-cholan-24-oylglycine;Glycochenodeoxycholate;Glycochenodeoxycholic acid;Chenodeoxyglycocholate	-2.50047781995797;-2.50047781995797;-2.50047781995797;-2.50047781995797;-2.44817600873886;-2.44817600873886	MS1 mz matched	414.3	201.351	109720	106887	109213	114610	122440	113389	110455	110121	110384	107739	121141	71110.2	38439.2	53108.2	181213	128935	258774	14459.6	38266.8	157081	49296.2	49695.2	19232.5	18084.2	48626.4	36538.5	139468	19237	22803.7	12143.6	16897.7	48906.7	100931	31487.3	27045.7	29746.2	6269.91	89279.2	20578.6	803928	17997.8
1620	positive	NA	NA	Se-Adenosylselenohomocysteine;	-13.9111080198202;	MS1 mz matched	414.299	224.298	26769.4	27201.7	17711.3	19563.1	17301	28014.7	19008.4	21171.2	21374.6	30001.4	17609.2	195080	1285.43	9654.75	6623.32	8683.66	26822.8	1772.7	7209.21	7752.07	2757.98	12546.7	4020.47	2186.12	153795	4069.47	4560.35	4254.22	5828.5	2371.49	3008.68	4210.46	4175.18	7293.04	2723.08	5508.46	1447.39	6578.2	3720.8	185438	7703.56
1625	positive	NA	NA	NA	NA	Unmapped	414.743	321.052	6111.15	5869.16	6529.55	6153.7	5297.35	5516.24	5298.84	5649.03	5428.52	4788.98	5102.07	4952.97	7181.49	6185.79	3187.34	5380.43	3920.79	9335.61	5685.65	4728.84	6124.51	4875.4	6919.04	7384.53	4735.83	5108.07	6132.58	4200.18	5050.18	5718.03	9698.72	5508.09	5139.48	5709.12	6572.73	5070.46	6043.46	5067.85	3846.74	3529.1	6142.25
1627	positive	NA	NA	Flusulfamide	-18.3599	MS1 mz matched	414.954	352.43	80981.7	87197.4	82681.1	83355.1	87619.9	91577.1	76525.9	84312.2	80921.9	84006.9	78721.9	74531.4	89442.9	89664.4	79625.1	78379.8	87449.1	87301.3	91238.2	87684.6	87978.2	86572.2	82349.7	83728.3	93097.6	81665.4	83292.4	80895.5	85434.1	81268.7	85757.1	77454.1	85357.1	83606.1	79440.4	79731.6	85646.4	88248.3	83501.9	83651.7	81082.6
1629	positive	NA	NA	4-O-Methylmelleolide;Clausarinol;Eplerenone;Armillarin;Armillaripin;Magnoshinin;Eplerenone;Estra-1,3,5(10)-triene-3,6alpha,17beta-triol triacetate;Estra-1,3,5(10)-triene-3,6beta,17beta-triol triacetate	-0.57628574917635;-0.57628574917635;-0.57628574917635;-0.57628574917635;-0.57628574917635;-0.482853626319191;-0.482853626319191;-0.482853626319191;-0.482853626319191	MS1 mz matched	415.211	36.4385	1622945	1763417	1756663	1581064	1618955	1696077	1664141	1697058	1675535	1572870	1746327	301930	473331	400447	713066	290862	542436	482419	544882	501657	1063761	557780	428806	914011	622635	594334	989537	377005	361823	1427368	980883	470735	320338	1177138	1598462	1079542	368427	511951	590594	583941	456276
1641	positive	NA	NA	Alpinine	-21.0299	MS1 mz matched	416.191	207.304	14135.3	12913.7	13256.2	14169.3	13250.5	13465.3	12489.3	13393.8	13236.9	12631.2	13772.5	17134.8	547.344	1305.6	25820.6	21247.2	3467.86	1346.95	622.055	8812.69	36634.4	760.421	472.223	21199.8	12314.9	11162.7	11514.6	14839.1	7297.75	1088.69	20345.5	1393.53	1090.05	27894.7	23074	23729.3	590.664	741.595	30090.7	37830.8	2786.39
1642	positive	NA	NA	NA	NA	Unmapped	416.196	342.451	2903.01	2937.44	3055.7	2183.57	2781.72	2370.37	2999.2	2332.97	3686.89	3238.33	3053.49	2404.11	4023.12	2787.62	2010.49	4564.79	2695.8	9514.83	3031.22	985.688	1997.99	3009.67	2963.2	2562.59	2143.03	2984.07	2150.84	1399.77	2615.28	1198.62	2316.62	185.719	4223.08	1684.08	1531.38	2738.36	2134.67	5523.92	1417.09	2374	563.033
1674	positive	NA	NA	NA	NA	Unmapped	422.884	352.413	35845.2	37812.9	36548.7	38085	43002.7	44192.7	41876.4	48281.4	45055.4	41886.5	42205.1	40898.4	46098.2	48840.9	39863.4	36734.1	47572.6	39663.2	43401.3	42333.9	38259.5	44360.6	43757.4	36092.4	47068.4	42071.2	46766.9	42717	35007.4	35440.3	39510.3	34231.7	41659.4	43416.6	43674	37007.3	37041.7	40378.7	46759.1	41776.7	37268.9
1683	positive	NA	NA	Linoleyl carnitine;Linoelaidyl carnitine;	15.0101646827849;15.0101646827849;	MS1 mz matched	424.341	168.726	91165.3	71389.4	94121.7	121746	72473.8	80232.9	86933.4	72643.5	75600.8	90292.6	69937	48877.6	181019	57671.9	114182	62436.9	29691.8	36715.2	121899	32170.6	75317.4	105144	94690.5	52520.3	77555.3	54023.7	78077.7	58431.2	89268.6	73419.9	142339	18556.5	78796.5	70734.7	55578.5	51181.7	43809.3	206165	42246.8	50954.7	80538.8
1696	positive	NA	NA	11Z-Octadecenylcarnitine;Elaidic carnitine;Vaccenyl carnitine;Oleoylcarnitine;	14.4314212658101;14.4314212658101;14.4314212658101;14.4314212658101;	MS1 mz matched	426.357	152.517	122346	117720	122447	112702	112364	111214	111880	100328	113511	103428	105379	86703.6	126561	141392	226524	117228	56120.6	59174.8	127957	67131.6	93891.4	113273	72254.8	120520	127697	98585.4	84496.6	91822.4	180249	136500	171433	41265.2	86836.6	106476	103466	80835.3	60073.4	149426	47771	93348.1	120978
1709	positive	NA	NA	Cefpodoxime;Cefpodoxime	14.4706938584242;14.5285317306986	MS1 mz matched	428.068	132.481	171448	104475	114403	109563	120979	98186.7	123096	126077	128899	132066	132596	1748.49	0	76636.2	496.916	0	183.595	13467.4	497.664	378.547	269977	0	567.842	202.455	1508.21	50359.6	759.854	738083	180182	171.374	15818.5	742569	578.049	0	656329	41156.6	157.302	552.109	5777.98	2337.73	130190
1713	positive	Stearoylcarnitine	0.9904	NA	NA	MS2 forward	428.371	166.715	19769.7	20418.1	19999.7	19997.7	20916.4	18083.9	22095.8	20717.5	20967	21797.1	18646.3	13452.4	31726.1	27358.1	32375.1	13464.1	9516.94	9863.03	30725.4	10600.3	12140.6	24940.5	25632.1	23046.8	39755.8	18401.6	17148.6	20082.2	19542.4	24290.2	24351.3	14094.5	23489.6	21499.6	20622	23493.7	31421	64735.4	9045.63	16109.2	19513.5
1731	positive	NA	NA	Hexadecanedioic acid mono-L-carnitine ester;Imperialine;Cevan-6-one, 3,20-dihydroxy-, (3-beta,5-alpha,17-beta)-;Kashmirine;Peiminine	14.3497639654406;-21.1993978328717	MS1 mz matched	430.315	265.849	9589.61	9262.37	9302.5	9610.11	9447.15	10126	9300.05	10088.5	10176.6	10036.9	10747.8	20658.5	1524.48	5566.36	23662.1	21397.8	13881.6	2588.8	6937.64	6049.87	7242.26	6598.29	4025.66	4155.69	17065	6928.6	3598.7	7357.4	22413.1	5166.4	9472.39	4246.05	4058.71	3548.89	4636.52	5627.86	1697.48	5072.54	7933.4	87938.9	9483.71
1733	positive	NA	NA	alpha-(Methoxyimino)-N-methyl-2-[[[1-[3-(trifluoromethyl)phenyl]ethoxy]imino]methyl]benzeneacetamide;	-8.10041967543897;	MS1 mz matched	430.378	32.159	240876	262448	260994	237835	235666	233806	249302	242371	239083	228094	250985	161632	382704	215199	163493	134688	129461	198568	126408	132706	208075	199677	159421	201951	154884	173785	168063	199255	159832	136594	165216	195280	231591	161179	144830	358345	183670	55712.2	121696	206520	336543
1740	positive	NA	NA	4-O-Methylmelleolide;Clausarinol;Eplerenone;Armillarin;Armillaripin;Magnoshinin;Eplerenone;Estra-1,3,5(10)-triene-3,6alpha,17beta-triol triacetate;Estra-1,3,5(10)-triene-3,6beta,17beta-triol triacetate	-0.57628574917635;-0.57628574917635;-0.57628574917635;-0.57628574917635;-0.57628574917635;-0.482853626319191;-0.482853626319191;-0.482853626319191;-0.482853626319191	MS1 mz matched	432.237	36.73	449457	524473	465199	471565	478095	451666	519890	491748	451712	453912	468399	134445	212642	194776	347894	123755	243619	221133	242540	227786	513431	271463	197449	392785	279695	215829	423735	152046	145567	600966	455427	182805	144566	471253	671634	473021	178445	206503	240487	252450	221727
1745	positive	NA	NA	NA	NA	Unmapped	433.004	352.437	852005	785387	714594	645017	626221	590158	538938	543465	504700	484657	481548	527453	585386	574117	500981	669060	579006	771115	655496	686370	654267	557128	564962	755020	649526	631690	469012	492694	840169	764017	524960	715240	504546	552380	566145	757358	756561	612083	482204	603597	814489
1747	positive	NA	NA	15beta-hydroxycyproterone acetate;Armillaricin;Zizybeoside I	-3.12770183036914;-3.12770183036914;13.4208558247559	MS1 mz matched	433.177	33.455	7211.22	6820.62	7156.11	8783.54	9052.31	6608.35	8396.24	6555.67	8808.34	8708.92	9915.24	36361.9	2241.59	43703.8	86009.8	9576.68	68388.4	18744.3	16502.7	2320.5	3548.62	30122.7	2044.81	20835.4	1814.53	62544.6	113265	822.357	22541.1	2212.2	63150.8	2117.03	34371.4	2091.43	3227.66	4581.72	6614.93	60108.6	1987.28	1446.46	42768.1
1756	positive	Glycolithocholic acid	0.6217	NA	NA	MS2 forward	434.316	201.159	4704.75	4408.48	3714.82	4420.95	4223.03	4379.19	3967.11	4833.4	4007.52	5176.19	3814.47	2953.08	1352.36	2483.12	6651.42	5545.03	9999.24	1062.43	1959.29	5874.76	2508.89	2318.8	1168.54	1100.85	2785.67	1672.09	6036.64	1193.99	1406.18	786.479	1036.29	1814.1	3728.57	1447.31	1386.71	1303.51	429.417	3954.58	1104.48	21450.8	1026.93
1772	positive	NA	NA	4-O-Methylmelleolide;Clausarinol;Eplerenone;Armillarin;Armillaripin;Magnoshinin;Eplerenone;Estra-1,3,5(10)-triene-3,6alpha,17beta-triol triacetate;Estra-1,3,5(10)-triene-3,6beta,17beta-triol triacetate	-0.57628574917635;-0.57628574917635;-0.57628574917635;-0.57628574917635;-0.57628574917635;-0.482853626319191;-0.482853626319191;-0.482853626319191;-0.482853626319191	MS1 mz matched	437.192	36.187	17322.8	12786.3	12017.6	14221.2	12728.1	12840	15560.5	14447.4	16664.1	16420	18376.5	3213.48	5943.23	6659.64	6222.77	5976.43	8648.89	4345.8	10059.3	3194.08	8137.02	12530	7089.41	14108.5	7666.92	10732.5	13952.5	3399.92	2583.21	20607.4	20272.8	9039.8	5040.63	18641.3	21198.2	15814.7	4404.51	8739.36	4428.5	5557.02	6161.56
1781	positive	NA	NA	NA	NA	Unmapped	438.378	35.44	36178.3	36397.8	38122.4	36184	37371.7	38418.8	35134.4	38052	39617	36403.3	33728.7	35792.5	37682.9	42537.3	45410.4	45841.4	42179.2	42861.4	46731.8	37011.5	39041.2	42550.6	48751.6	38778.9	39017.6	66974.2	41469.6	40846.3	35913.2	50947.4	42351.6	50429	33702.1	35930.6	40040.6	46052.8	36737.1	58639.5	35947.2	50604.7	43853.1
1782	positive	NA	NA	NA	NA	Unmapped	438.916	352.445	45306.5	48908.8	45194.8	45174.5	52632.2	55348.1	49169.3	55068.3	49344.4	54229.4	48438.7	49994.2	54943.1	51372.7	50709.8	47030.9	57277.1	52365.8	56142.6	45306.1	57041.7	58821.6	52744.2	48902.4	49965.5	53421.8	56104.3	51143	43086.3	43645.8	51543.9	43995.7	52333.3	51549.8	51002.7	45519.7	45151.5	54812.7	55966.8	49556.1	46621.5
1797	positive	NA	NA	LysoPE(0:0/15:0);LysoPE(15:0/0:0);	13.9066438905746;13.9066438905746;	MS1 mz matched	440.276	199.455	3487.47	3039.28	3629.34	2707.99	3587.23	2635.14	2853.64	2899.98	2903.17	2544.31	2939.42	2174.04	7554.98	878.041	834.851	411.699	3158.19	5601.69	2608.78	481.159	1500.89	2012.97	1418.4	5290.53	3514.8	15951.6	7648.97	750.966	493.512	2207.68	2171.03	10308.4	4459.8	1673.28	6765.42	1376.45	2736.2	529.683	2216.34	2116.24	6169.92
1812	positive	NA	NA	Folic acid;Folate;Pteroylglutamic acid;Folic acid	1.40567960712913;1.36351603359843	MS1 mz matched	442.14	308.57	5057.24	4036.22	4593.27	4283.94	4131.9	3727.02	3976.57	3716.11	3309.11	3652.81	3392.9	2984.23	5359.7	2720.79	2503.55	2861.72	4079.45	4737.42	4647.45	4136.57	3969.02	4515.93	3530.75	5629.38	3316.64	5018.99	3480.89	3120.14	2792.74	4609.27	4206.79	4461.98	4363.31	3629.43	4091.98	4177.86	5357.28	4624.71	3365.41	2282.11	4897.56
1828	positive	NA	NA	Proansamitocin	-20.695	MS1 mz matched	444.222	207.321	3531.19	3685.84	3736.02	3410.24	4340.12	3707.11	3866.01	5168.9	3900.03	3990.02	4211.76	4664.93	313.952	473.885	7510.76	4327.1	1229.17	262.896	325.551	2566.37	12200.5	300.212	389.876	3981.09	2763.28	3169.54	3185.67	5539.12	831.82	450.628	3581.68	511.415	779.191	5697.11	6094.21	5888.76	373.464	267.514	7487.37	8774.4	915.59
1829	positive	NA	NA	NA	NA	Unmapped	444.331	35.883	7822.86	8942.64	11615.3	7588.3	9871.66	9071.49	9173.96	7309.77	8445.64	8625.48	10719.7	10857.3	6402.42	7666.91	10062	7165.71	6277.5	8938.09	9487.04	9011.51	6774.38	43805.8	10840.8	12481.1	8946.6	6171.68	6500.01	9601.6	5753.02	8015.21	5476.19	7790.02	6857.47	3439.34	3190.61	4498.76	3668.63	11697.5	4225.69	4923.06	10675.3
1835	positive	NA	NA	Difecoum	17.3901	MS1 mz matched	445.18	299.323	1941.73	1314.87	1243.62	1312.2	1282.93	1619.1	1721.07	1514.4	1816.34	1468.87	1616.17	3474.36	572.837	1385	588.9	724.27	706.696	4722.84	413.14	1080.86	3018.15	492.381	3726.72	520.738	1846.61	552.937	379.525	2382.2	5541.24	589.106	495.454	738.626	451.877	446.8	3342.84	4675.27	755.03	586.888	1885.6	5850.36	528.124
1839	positive	Desmosterol	0.6178	NA	NA	MS2 reverse	445.366	32.2695	82842.1	92242.5	88927.1	85839.1	94236.5	82877.7	92043.9	88003.1	87264.5	90178.7	92641	78545.7	82656.9	100800	91709.8	63053.7	62385.8	91667.6	52725.1	53616.6	83971.2	64629.2	99008.6	109673	64896	108328	96498.9	64030.4	54867.3	68944.6	90036.3	67609.4	92806.4	67196.2	90457.9	121709	56835.6	47955.1	52858.4	74929.1	91262.5
1848	positive	NA	NA	NA	NA	Unmapped	446.398	32.849	162564	171553	164668	152442	138053	137005	133556	117644	123095	116871	124368	74005.7	97123.9	110437	73755.5	67644.9	57392.1	137731	59793.2	73273.8	122023	123842	69964.2	123816	82478.8	79529.9	72474.8	105047	95888.5	76805.6	66704.9	145306	123868	85987	83540.4	212688	98079.4	17383	69034.5	115036	229411
1859	positive	NA	NA	Aripiprazole;Aripiprazole	-14.0918605518485;-14.0191787060406	MS1 mz matched	448.142	380.599	2681.02	2180.86	2485.3	2269.71	3077.11	2733.43	2919.98	3639.46	3492.25	2890.14	3672.28	2599.02	7006.66	3024.38	2598.29	1485.64	2390.83	2586.82	3123.67	2612.45	2871.85	3900.06	3011.85	3253.72	2740.62	2657.1	3777.83	2724.03	1823.56	2297.49	6837.65	2202.55	4106.63	2910.28	2551.75	1915.15	4896.47	3331.66	1885.64	2051.38	3346.47
1872	positive	Glycochenodeoxycholate	0.993	NA	NA	MS2 forward	450.321	201.499	136983	156711	146009	149128	150775	147516	149637	143793	143307	146393	136250	101324	47801.9	62577.3	247082	178472	338247	19186.3	57269.3	212017	64110.8	63385.5	24860.5	24329.5	70707	52287.9	177049	25200.9	31940.6	15684.2	20325.8	63786.2	126756	42671.6	34548.7	38804.5	8473.91	126594	25274.2	724460	25286.5
1893	positive	LysoPE(16:0/0:0)	0.959	NA	NA	MS2 forward	454.292	195.925	27677.4	27538.2	33176.8	28746.2	32117.6	26561.7	34565.7	29203.5	29902.4	25196.8	30347.4	13764.3	64186.1	16456.7	21084.2	25878	16738.7	22676.8	26336.9	20241.6	20820.2	24633.2	35410.8	27725.5	48440.7	23703.5	14294.5	19130.2	25225.8	29715.5	18780.2	31621.3	17011.7	37503.2	21998.8	26330.7	36302	33296.3	21680.1	26100.3	28350.6
1894	positive	NA	NA	10-Deoxymethymycin;YC-17	13.5234	MS1 mz matched	454.315	258.633	2204.75	2160.55	2322.74	2227.04	2165.02	2374.65	2031.39	2210.46	2438.6	2401.24	2077.88	4281.47	867.173	1696.6	4877.19	7005.33	2150.78	1192.59	990.166	2375.03	1983.35	2152.07	1506.51	1557.43	2561.82	1759.75	1204.23	1498.26	4090.11	688.079	3492.05	909.734	1078.91	1241.06	1385.71	1773.17	1137.79	1243.3	1598.43	9706.83	2653.63
1912	positive	NA	NA	NA	NA	Unmapped	456.331	254.894	21933.8	20461.7	23237.5	18846.3	19843.7	21885.8	25273.5	21446.7	20161.4	19076.4	19262.3	43739.1	3605.87	18320.9	36484.5	67476.7	31477.5	5804.34	18453	21093.2	15449.9	15128.7	11727.5	11346.6	35259.1	21343	7857.66	9377.83	38711.3	14233.6	21537.8	6975.56	6546.16	8295.38	10750.8	13913.3	4930.34	12563.4	13464.2	142167	19016.8
1916	positive	NA	NA	NA	NA	Unmapped	456.965	352.379	476522	471475	447583	404123	423748	411290	334905	367009	352478	369381	339981	359161	416712	406427	358283	413736	414564	457382	435353	451699	436256	424540	407507	464393	447849	404520	363267	362821	477068	452082	365373	431256	373686	421245	367691	462483	457374	431608	367349	407508	459077
1931	positive	NA	NA	NA	NA	Unmapped	458.347	248.094	11547.4	13916.9	14621.4	11454.9	14177	15319.5	13800.6	14987.2	13511.4	14565.1	13377.4	23636.5	4162.72	11224.1	16357.5	21689.3	23892.5	5471.78	11201	12642.4	8840.03	20959.5	9291.52	7154.54	18082.7	9678.25	7225.04	8948.74	16487.9	16216.8	12596	6543.69	8307.07	6688.53	7127.71	8380.41	4192.92	10948.5	10606.6	36373.9	11520.6
1945	positive	NA	NA	Thioguanosine 5'-diphosphate;Militarinone A	5.16641663872053;13.6583434688881	MS1 mz matched	460.268	36.565	88718.2	91004.5	86044.5	79134.6	81279.6	92258.4	81511.7	83743.2	80023.2	82674.9	86935.3	26695.1	65631.8	39181.2	41009.5	27030	41341.9	32494.8	33367.3	42690.6	49707.2	38217.9	34980.4	45074.5	36941.7	46797.4	53547	28590.4	35720.9	58386.9	51348.1	39056.8	36208.7	52506.9	59681.6	48785.9	35223.9	43531.8	47466.6	47934.7	30106.6
1952	positive	NA	NA	NA	NA	Unmapped	460.923	351.901	40978.8	38999.9	40381.9	42748.1	45365.7	47999.9	41905.3	41669.1	45897.3	49562.9	41735.8	43680.5	44974.1	44888.6	48185.1	39484.2	50235.2	40321.5	46193.2	46943.8	41799.1	45431.7	46328.7	43417.1	44660.4	40839.8	48719.5	47152.3	40452.5	36736.7	40605.1	37515.9	41001.4	50675.8	46574.7	42679.5	40962	38625.4	42976.1	47748.7	39243.3
1956	positive	7-Ketocholesterol	0.6168	NA	NA	MS2 reverse	461.362	34.234	8200.26	5806.96	7478.46	6891.78	8494.44	8985.78	9193.14	7758.01	8822.72	9235.98	9965.7	8523.08	17449.7	6210.9	11194.4	9087.9	7069.4	13306.7	10771.6	4648.48	5373.12	5649.7	12875.2	15965	9110.39	13849.6	10258.2	7259.12	6673.9	5428.78	8936.85	7983.52	5967.17	7969.62	11661.9	7540.91	4424.92	15544.8	5325.72	5516.67	9260.06
1961	positive	NA	NA	NA	NA	Unmapped	462.266	194.908	26575.4	25974.2	23018.6	25209.6	26352.9	24841.5	24897.7	23899	23706.7	25223.5	24362.3	16001.1	7034.18	3845.02	15524.6	12487.1	35194.8	5573.55	2033.96	14427.3	11845.6	6106.72	2169.75	6052.19	28213.9	13640.8	47306.4	3133.29	9094.89	2324.08	1337.75	8508.74	18815.8	2048.33	13280.3	4595.01	916.958	7016.39	10463.8	325108	4210.41
1967	positive	NA	NA	NA	NA	Unmapped	462.902	351.831	21817.9	24352.4	23428.9	24270.4	28321.4	27259.2	25004.7	24444	26125.6	29951.1	29691.7	27466	32144.4	26419.1	28397.3	22711.9	30496.7	25285.3	28730.9	28915.6	24307.6	29121.6	29569.5	24495.2	26263.5	26441.1	31750.5	28680.4	23654.1	21337.6	27714.5	23775.5	26183.1	27635.5	25890.7	25146.5	21059.5	28880.8	31354.2	27948.6	23397.7
1979	positive	NA	NA	Taurodeoxycholic acid;Taurochenodesoxycholic acid;Tauroursodeoxycholic acid;Taurodeoxycholate;Taurodeoxycholic acid;Taurochenodeoxycholate;Taurochenodeoxycholic acid;Chenodeoxycholoyltaurine;Tauroursodeoxycholic acid	-1.51993776539994;-1.51993776539994;-1.51993776539994;-1.60225340924788;-1.60225340924788;-1.60225340924788	MS1 mz matched	464.282	155	57581.8	57049	59828.5	62492.9	56544.9	54156.8	49897.4	46385.1	56094.7	55702.4	44032.7	41143.6	14008.3	14603.1	111690	35518.7	47452	18373.1	8982.4	35112.3	27862.6	18708	3922.45	14778.3	47739.9	17292.6	67247.2	12979.1	21167.6	16179	4573.64	18959.1	87622.8	6777.44	42910.5	10771	2482.94	40270.1	12186.5	340668	20288.3
1982	positive	NA	NA	NA	NA	Unmapped	464.282	189.167	18108.4	16533.6	14916.3	15692.6	16341.7	18121.8	15398.9	18128.9	19120.5	17641.1	21252.1	41955.6	9911.8	3450.15	9352.55	7309.45	9287.42	6991.5	6400.72	5420.77	5700.29	8546.68	4394.85	7959.91	95260.5	6845.84	7345.45	5932.3	7823.23	5441.16	7280.57	7620.13	10453.6	7304.15	10606	7570.15	4423.24	9197.97	5234.63	231964	7704.66
1987	positive	NA	NA	Sulfasalazine;Sulfasalazine;Salicylazosulfapyridine;Salazosulfapyridine	8.81682445488217;8.79245657476269	MS1 mz matched	465.031	236.049	3940.17	4254.21	3445.2	4387.03	3584.77	4299.36	4368.93	5645.38	2872.99	2601.34	4004.71	5234.83	5509.42	5930.35	3759.71	3330.56	4847.91	6743.81	5790.28	5470.66	6635.01	2937.7	4206.08	5482.14	4272.42	4125.08	4509.18	4857.81	4831.45	5226.5	5294.11	4041.45	5551.65	5214.86	5287.97	4015.34	2620.39	4559.97	5922.41	2715.56	5877.8
1995	positive	Glycocholic acid	0.9971	NA	NA	MS2 forward	466.315	244.199	47981.8	51519.5	50337.5	48522.8	52255.3	50478.6	55186.6	52529.5	58563.3	57288.1	56510.1	45011.5	19751.1	16136.1	21575.5	31996.5	127112	5258.38	9976.55	41855.3	27250.7	22733.2	7662.51	9457.73	61534.1	47953.1	94340.1	6665.13	13407.8	5063.64	4477.18	20855.5	23683.4	8646.36	11169.7	16144.5	1821.33	22618.3	18484.7	584971	11151
2002	positive	LysoPC(14:0)	0.9928	NA	NA	MS2 forward	468.307	193.862	83890.7	109162	94241.1	74706.3	109068	72871.3	67432.6	66558.8	69876.5	65263.8	61481.6	33210.7	189371	24158.5	25221.3	35989.1	61914.8	85088.5	56284.6	28213.3	43190.4	66646.7	66660.6	65735.6	195270	123020	69190.2	28658.2	36300.5	75763.2	71069.4	261006	110794	65272.6	47982.7	82550.5	163967	62249.4	39668.6	68628.2	124065
2023	positive	NA	NA	Chenodeoxyglycocholic acid;Deoxycholic acid glycine conjugate;Chenodeoxycholic acid glycine conjugate;Glycoursodeoxycholic acid;Glycodeoxycholate;Glycodeoxycholic acid;3alpha,12alpha-Dihydroxy-5beta-cholan-24-oylglycine;Glycochenodeoxycholate;Glycochenodeoxycholic acid;Chenodeoxyglycocholate	-2.50047781995797;-2.50047781995797;-2.50047781995797;-2.50047781995797;-2.44817600873886;-2.44817600873886	MS1 mz matched	472.302	201.517	22602.2	19358.5	19796.6	18165.2	18111.2	19785.5	17684.3	19008.7	19183	18237.5	19222.9	13076.4	6454.73	7861.52	32664.8	25575.3	45847	2907.78	6785.26	26071.3	10775.3	8791.23	3384.02	3935.78	8880.42	6753.07	24105.8	3368.58	5222.34	2295.43	2508.41	9114.7	21490.6	5063.37	5140.6	5705.84	1741.44	16392.3	3942.37	102753	3780.48
2026	positive	NA	NA	NA	NA	Unmapped	472.996	352.438	46198.9	43100.4	37084.1	36452.3	34143.7	36486.7	34949	37678.9	35151	30439.3	30666.3	30876.5	33659.1	34112.7	33611.3	38683.2	38893.6	41382.5	37868.2	38592.3	35647.4	34612.6	32215.3	40447.9	34282.6	35887.9	31862.7	34768.7	42241.4	47768.1	33368.1	41715.2	32574	32468	34297.1	39672.4	41909.4	36641.7	33642.4	34532.5	37455.4
2043	positive	NA	NA	NA	NA	Unmapped	476.743	321.052	6760.77	6671.38	6781.37	6133.02	5994.24	5696.42	5740.67	6318.35	5326.38	5357.52	4950.74	5478.72	8552.77	5899.77	3218.59	5712.08	4358.14	10798.7	5719.19	5134.61	6428.14	5127.27	8355.99	8586.4	5838.48	5787.38	6699.04	4721.22	5074.71	6232.6	10153.1	5700.92	5571.64	6520.01	6955.35	6083.93	7105.7	5935.99	3944.4	4082.17	6896.34
2053	positive	NA	NA	LysoPE(18:2(9Z,12Z)/0:0);LysoPE(0:0/18:2(9Z,12Z));	-3.22511342423645;-3.22511342423645;	MS1 mz matched	478.292	194.74	40962	38424	41643.2	34931.1	40209.8	35947.3	51202.8	35920.2	35321.5	42489.4	41249.8	12898.1	112957	37284.4	14366.3	16047.4	16489.9	46813	50403.2	56798.5	27695.3	36054.5	37749.5	37461.2	19633.2	47724.3	55351.1	21802.6	7066.69	31494	18643.3	36105.7	34625.9	27677.5	58659.9	39344	47381	54454.7	12126.9	9336.17	36965.1
2054	positive	NA	NA	LysoPC(16:0);	1.03062086747797;	MS1 mz matched	478.328	189.469	33724.6	33549.5	29312	32174.2	40465.4	34503.6	37743.7	37711.3	34043.7	42894.2	37841.8	34483	45634.4	31912.3	30531	31710.5	25671.9	29559.9	40772.2	22820.7	28289.3	39437	53126.9	27410.4	49589.4	36495.5	23253.4	16414.2	19407.5	36363.9	43854.4	60036	24943.4	38007.3	24375.2	32208	38542.3	42106.2	19826.8	43870.3	43745.3
2068	positive	NA	NA	LysoPE(0:0/18:1(9Z));LysoPE(18:1(11Z)/0:0);LysoPE(0:0/18:1(11Z));LysoPE(18:1(9Z)/0:0);	12.864971092642;12.864971092642;12.864971092642;12.864971092642;	MS1 mz matched	480.307	193.289	30134.9	18065.5	24226.2	20681.7	20832.5	25822.4	25875	22904.9	18715	29394.5	27520.5	12595.9	53868.9	42929.3	21588.5	16740.3	16238.5	42178.9	26570.2	27533.1	23468.9	12929	25382.2	20720.2	23103.2	40026.3	28578.9	12462	11622.8	26062.5	19253.4	38098.9	19561.7	19806.4	38757.2	21551.9	18071.9	53511	10966.3	173164	23870
2069	positive	NA	NA	LysoPC(P-16:0);	12.7471883558065;	MS1 mz matched	480.344	181.349	72530.2	73127.9	48447.3	67218.9	86221.8	57353.1	64697.3	39742.5	64740.2	66196.3	50132.2	54269	85756.1	26268.5	54806.8	33830.9	36982.5	34318.9	75037.6	22210.5	45155.8	51272.6	74875.8	44839.3	51294.4	43091.8	32600.2	65519.9	19292.3	74506.9	83313.2	77301	50008.9	70927.9	27142	43180.7	99163.4	105445	22251.2	33700.4	113140
2076	positive	NA	NA	2,3-Dehydrosilychristin;2,3-Dehydrosilybin;Cryptocyanin;Cryptocyanine iodide	15.3777168705183;15.3777168705183;14.2256623763132	MS1 mz matched	481.113	309.252	6674.69	7128.7	7055.35	6578.18	6377.03	6594.46	6740.79	6343.87	6407.32	6698.47	6477.47	4351.82	10276.2	5225.07	2824.48	3722.12	6610.64	7050.04	8438.23	6467.95	5632.95	7302.06	6100.35	9121.02	5856.6	8336.98	4938.77	5711.4	3695.32	5878	8793.54	5673.88	7907.68	6770.2	5851.38	6764.4	8980.77	6821.7	3899.51	2348.76	6917.64
2086	positive	NA	NA	Sodium picosulfate	-12.1548	MS1 mz matched	481.982	235.647	8263.65	7305.36	4795.06	5697.65	5737.55	4888.29	5111.82	5593.91	6348.26	5161.42	4763.65	6040.45	6570.3	7448.51	5993.07	3961.59	6136.78	6861.35	6906.4	5979.63	6387.49	7120.67	6201.18	5938.71	7020.17	5841.9	6021.89	3965.24	8124.21	7140.45	5817.03	6120.28	8201.86	6623.18	7434.17	6684.93	6620.77	6543.57	6498.01	4959.36	5680.8
2091	positive	LysoPE(18:0/0:0)	0.9163	NA	NA	MS2 reverse	482.324	191.906	52242.7	53507.6	52066	83617.7	50490.3	47630.2	54272.5	47545.8	65895.2	56186	63209.4	34887.4	167706	42172	37509.2	35715.1	42740.7	29996.8	62034.4	36440.6	33866	61092.5	74019	31869.8	80571.3	64644.5	25307.5	26006.5	29782.3	51417.8	111857	91555.8	42884.1	62167.6	31893.2	56291.4	62610.4	67292.2	30272.6	41927.4	43863
2092	positive	NA	NA	1-O-Hexadecyl-lyso-sn-glycero-3-phosphocholine;1-O-Hexadecyl-2-lyso-sn-glycero-3-phosphocholine	12.4655	MS1 mz matched	482.359	193.099	65600.9	59081	65294.3	95721.8	54503.6	67066.2	92681.2	53462.8	51867	63450.1	64488.1	36363.2	144703	41713.5	46300.9	29151.4	53035.4	59751.9	46603.5	53753.1	48119.7	44585.3	59103.3	48022.5	79561.4	45661.8	47527.3	32094.3	16359.6	113972	74845.9	47926.2	92353.7	86158.8	34366.8	45091.2	99064.7	179337	32703.7	55492.8	83224.1
2093	positive	NA	NA	NA	NA	Unmapped	482.404	35.885	45791.2	48580.7	44718.4	43773.2	43654.8	45289.8	44135	41545.8	40018	46754.3	42492.2	37372.7	48960	45156.9	45491.2	51525	59036.1	64205.5	58378.6	41628.1	51503.4	62217.6	55774.1	48812.2	42862.5	66998.7	45547	51435	40319.1	56785.2	38392.9	57831.2	43318.1	46870.3	52143.6	49826.6	47805.2	57454.1	44155.4	56469.4	52644.4
2095	positive	NA	NA	NA	NA	Unmapped	482.906	351.868	25881.2	25372.3	28952.9	30207.7	31567.2	30989.7	27314.6	31554.4	30885.4	34648.8	27086.7	31934	30602.8	31501.6	32109.1	28347.6	31733.4	31577.4	32736.8	31673.5	30553.7	33111.5	33056.2	31085	33042.2	32138.8	35114.5	30573.8	26909.6	24262.8	29773.2	26596.8	30861	34561.4	33300.9	28302	26803.8	31584.7	33728.3	29815.6	25836
2113	positive	NA	NA	Stigmatellin Y	-3.09737	MS1 mz matched	485.289	34.6855	31553.3	29207.4	32024.1	25864.9	32363.5	28640.8	30097.7	32362.2	33034.9	30053.7	28439	14748.4	26949.9	20539.3	17997.2	17214.3	26361.4	19677.2	60101.9	24891.1	64944.6	21889	22499.7	24499.7	20593.5	21253.1	59444.1	25539.4	43149.4	20391.2	38301.5	18050.3	31729.6	70875.9	41497	25045	40974.7	26519.4	14944.3	16330.2	16189.8
2130	positive	NA	NA	Chenodeoxyglycocholic acid;Deoxycholic acid glycine conjugate;Chenodeoxycholic acid glycine conjugate;Glycoursodeoxycholic acid;Glycodeoxycholate;Glycodeoxycholic acid;3alpha,12alpha-Dihydroxy-5beta-cholan-24-oylglycine;Glycochenodeoxycholate;Glycochenodeoxycholic acid;Chenodeoxyglycocholate	-2.50047781995797;-2.50047781995797;-2.50047781995797;-2.50047781995797;-2.44817600873886;-2.44817600873886	MS1 mz matched	488.271	201.457	5802.24	7300.39	6398.18	6620.29	6454.07	7178.58	6391.91	6402.98	7148.38	7189.42	6581.08	4863.7	2806.54	3382.75	10942.7	9274.97	16680.8	1449.31	2808.8	10523.5	3480.19	3365.49	1751.34	1800.24	3114.77	3033.09	8844.79	1641.89	1782.22	1571.38	1730.4	3433.06	6048.03	2385.06	2512.2	1741.16	745.772	6002.18	1635.14	31442.6	1356.87
2133	positive	NA	NA	NA	NA	Unmapped	488.357	36.749	10018.6	7809.05	10297	8176.56	7833.7	9797.89	9403.96	11088.4	11006.5	9086.06	9335.49	11275.6	11588.3	9320.92	8539.9	9992.37	6388.11	10716.3	9026.15	13996	13795.3	52407.8	12323.2	17666.5	10251.9	7926.86	8425.07	10542.9	6833.64	10936	8566.81	12892.9	10296.3	8422.47	5635.25	11894.9	5824.84	13984.5	4803.36	5829.13	12110.8
2144	positive	NA	NA	LysoPC(14:0);Buprenorphine	-2.5450395316692;-7.70377116719371	MS1 mz matched	490.29	194.718	4180.74	4814.06	4109.6	4789.68	3976.42	3069.13	3473.17	3012.1	3361.1	4203.03	4223.77	2146.67	7385.77	2064.67	2255.34	3216.55	2757.74	3064.43	3659.72	2306.63	3037.04	2983.91	4486.64	2468.16	4214.76	6680.69	4016.83	1121.1	990.9	4404.94	3712.33	8291.32	7680.35	3229.59	3486.03	4036.47	5822.01	3397.75	1414.35	2465.76	4276.1
2150	positive	NA	NA	Cer(d18:1/14:0);N-(Tetradecanoyl)-sphing-4-enine	2.36534921848474;2.35533900402103	MS1 mz matched	492.476	35.255	8339	7002.26	8214.24	6627.28	4917.48	8780.62	6164.78	6792.95	7034.36	6093.73	6788.74	3323.25	5976.6	5030.06	6460.36	6351.9	3787.37	5756.85	4144.11	3926.56	3813.71	8269.59	3921.88	4345.96	9753.63	4168.12	7875.69	3311.36	6605.72	3876.99	7554.81	5926.72	6113.17	3739.74	6533.31	8082.25	5642.21	4908.29	4717.88	5943.76	5052.97
2156	positive	NA	NA	LysoPC(16:1(9Z));Tiamulin	12.8346645225288;1.15736870150011	MS1 mz matched	494.323	190.685	133385	130166	150904	115192	191473	125198	153560	109142	120880	192585	131041	84484.6	423554	80687.8	48191.9	87305.5	78846.5	91380.2	229191	91940.9	102553	305310	127041	65633.8	248466	114642	51829.2	74729.8	91912.2	168400	129822	182338	94387.4	157624	56372.2	172606	280838	162663	62700.9	207419	94502.3
2158	positive	NA	NA	NA	NA	Unmapped	494.777	190.069	30970.6	32329.3	30724.6	28551.5	37552.5	31962.5	36544.4	36504.4	34838.1	16291.1	29374.2	23771.2	42919.5	20117.4	17995	17755.8	30323	21787.1	25946.1	31157.1	17516.5	34215.9	29055.2	33274.6	56201.8	22227	21320.8	14503.8	12896.3	35527.3	32479.2	31796.7	31433.1	23588.7	19407.4	25372.4	37093.5	39330.9	17903.5	35460.6	32169.2
2163	positive	NA	NA	6'-Oxo-G418	14.6134	MS1 mz matched	495.266	31.6985	4879.16	4602.78	4854.95	4321.69	4592.46	4891.49	4559.41	4623.63	4015.68	3169.14	4646.18	2366.91	3898.19	3316.63	4904.63	2612.44	6308.7	1606.72	4179.38	3451.63	3341.36	2519.61	2933.8	1550.36	3532.66	5305.45	4100.5	4198.93	3251.69	4282.68	2432.17	2735.02	1733.94	1866.67	1472.76	2930.09	2920.62	3279.72	4150.24	4596.96	3279.05
2165	positive	NA	NA	NA	NA	Unmapped	495.378	201.873	130393	144770	138213	138759	139503	141551	137138	143622	149518	154358	150304	62460.3	38452.9	41904.9	215269	149852	362678	9918.27	35820.8	238610	62323.1	51543.4	14363.1	16817.2	51936.3	34734.3	213802	19719.6	15049.2	9883.69	12094.8	58016.8	166205	27862.8	25752.1	26844.4	4558.7	121860	20392.4	384268	15228.8
2182	positive	NA	NA	NA	NA	Unmapped	498.085	333.471	11821.6	8707.73	11984.6	9643.86	7324.56	9037.22	10027.4	9324.9	9565.83	10799.7	9383	5909.99	678.296	6939.75	2231.72	1150.19	379.772	1938.33	2062.87	703.549	15999.4	640.431	634.24	519.664	2198.44	4409.72	1831.41	64707.9	15908.1	2343.3	11916.6	54952.7	998.851	283.246	37661	4548.46	1294.52	1054.57	5696.77	977.617	15250.5
2197	positive	Taurochenodeoxycholate	0.9922	NA	NA	MS2 forward	500.303	133.219	31615.8	33822.8	29098.5	31860.6	29687.9	29020.8	30613.1	32033.3	31009.4	21063.5	28257.3	37405.8	12973.9	9654.37	60916.8	20196	30537.3	10417.6	5306.9	30722.7	17053.4	9154.66	1554.77	9127.28	29529.9	12656.4	42072.7	6423.69	14277.5	11767.4	1893.03	8471.31	53035.2	5554.17	31411.7	5520.62	159.288	23879.2	10838.5	150851	8929.86
2206	positive	NA	NA	NA	NA	Unmapped	502.292	191.31	29503.7	30397.4	26497.1	26050.3	23846	28480.7	29592.5	32708.8	38753	28530.3	38321.5	12539	25803.3	21307.2	13206.6	13643.2	17150.2	37002.5	46836.8	28293.2	26069.9	34933.4	40932.5	25639.5	22043.3	30101.3	26052.7	17149	6760.95	37407	28200.3	24625.9	37051.9	28194.8	27380.1	30913.7	33005.9	33633.5	10762.7	7320.99	43946.2
2207	positive	NA	NA	Stigmatellin Y	-3.09737	MS1 mz matched	502.315	34.7765	25073.9	23165.7	22011.6	21057.1	21439.6	23515.6	28010.4	22648.1	22360.9	22715.5	18751.8	12116.5	19384.5	15859.8	12817.6	17563.8	18210.9	16643.6	42572.6	15605.3	41463.1	15417.5	17953.1	17853.7	15795.3	15764.4	40570.2	22311.6	28965.7	13594.5	27340.6	14331.5	22399.6	48391.5	28940.4	21510	32580.8	16970.8	13467.1	15647.6	12714.6
2241	positive	NA	NA	Gymnodimine;Gymnodimine;Gymnodimine A;GYM A	8.10758740082598;8.02657516757631	MS1 mz matched	508.339	189.462	13658	17709.6	13103.7	14717.7	11244.5	13751.2	13780.2	15710.5	13849.6	13221.8	16934	10023.5	34550.8	13645.4	5410.01	8299.26	14267.5	4661.33	15973.5	9455.54	7486.51	24671.3	12802.6	3817.35	20989.6	10497.9	5902.15	5575.36	6690.19	11197.3	10907.9	26222.8	9309.83	20013.7	5144.36	15517.2	26854.1	18296	10445.8	9043.68	16238.5
2254	positive	NA	NA	Delphinidin 3-glucoside;	-6.87603919524854;	MS1 mz matched	510.354	188.224	70164.7	59298.9	57759	55165.1	71294.4	64448.8	82907.1	65678.4	71902.8	58595.6	64677.1	52301	188683	50771.3	18878.3	40844.7	58792.7	28350.7	99880.7	34712.6	29289.4	110071	79131.5	22494.2	102817	30279.3	31272.9	26259.5	29023.3	71464.3	126132	165304	49082.3	88363.3	28334.8	78906.6	118675	149249	38741.9	42344.3	66601.9
2256	positive	LysoPC(O-18:0)	0.6158	NA	NA	MS2 forward	510.389	190.685	13878.4	17418	11434.8	12366.7	13750	12109.9	10935.9	12658.7	15618.9	15627	12635	12462.9	22972.4	6941.88	12240.9	32787.9	12355.2	12132.3	14221.9	8387.41	11135.9	11790.8	15416.8	9515.69	10241.1	7737.76	7702.25	11973.9	6235.01	13207.8	18684.7	105431	12751.8	20105.6	6797.15	12349.9	16465	24927.8	6610.15	7219.2	15094.6
2259	positive	NA	NA	Cer(d18:1/14:0);N-(Tetradecanoyl)-sphing-4-enine	2.36534921848474;2.35533900402103	MS1 mz matched	510.486	35.134	5528.59	6684.56	5283.7	6120.46	6035.14	5909.89	6434.98	5803.07	4972.73	6208.23	5143.84	3171.51	3934.57	2938.8	4888.44	4343.69	3370.53	4994.41	4426.86	3411.47	3521.21	5020.9	3311.8	5010.9	6076.94	5243.17	6545.76	3922.97	4514.4	4541.43	5745	5647.06	5486.08	3965.25	5130.09	5069.54	3926.19	4545.7	4334.17	7160.32	3510.22
2268	positive	NA	NA	NA	NA	Unmapped	511.373	244.515	20863.6	23247.3	24044.8	23802	31254	28898.9	29922.3	28804.6	31375.6	32943.4	31132	22598.9	11749	9222.14	12387.1	16257.8	57255	2873.46	6068.01	26405.1	14933.6	15685.5	5628.87	3678.83	27377	23493.2	48441.7	4237.08	5880.86	2136.96	2192.02	9342.42	13180.5	2840.13	6184.17	8089.79	1608.44	11353.7	10687.3	124446	4472.41
2281	positive	NA	NA	Cer(d18:0/14:0);	-16.5103786791611;	MS1 mz matched	512.502	33.274	10646.6	13062.6	10504.1	10640.1	10676.8	11355.9	12082.5	10519.9	9089.2	8270.38	9093.86	1016.62	1231.74	2371.2	1184.93	1960.17	2328.45	2096.66	1540.91	1094.49	2028.71	2936.57	2274.72	2204.15	1513.92	2610.82	5253.61	2092.84	1558.68	719.733	1131.97	3621.83	1949.69	1827.46	934.618	4256.57	1590.82	1939.68	1683.45	2507.86	1998.11
2283	positive	NA	NA	NA	NA	Unmapped	513.125	342.788	2631.81	2718.16	3230.43	2285.3	2841.82	2427.41	2554.14	2822.53	3444.22	2571.3	2876.16	3117.64	3919.23	3582.94	3426.7	6392.41	5571.43	1862.88	4317.93	2339.4	2121.84	4710.02	4788.77	4236.52	3481.41	3530.05	3489.75	1311.81	2316.26	2236.72	2176.05	880.774	5699.38	2739.8	1248.78	4159.65	1470.05	4924.51	1883.72	3927.67	545.552
2298	positive	NA	NA	NA	NA	Unmapped	515.007	352.443	747782	666266	622463	523312	494894	466031	415448	417176	399406	352602	354530	406939	499343	467934	381718	570842	464038	638694	587367	564822	560726	432566	448399	652491	532823	502366	389087	410324	740490	658806	446294	639704	403700	443827	435340	631333	639082	501998	373989	472918	690097
2303	positive	NA	NA	Taurallocholic acid;Taurocholic acid;Taurohyocholate;Tauro-b-muricholic acid;Tauroursocholic acid;Taurocholate;Taurocholic acid;Cholyltaurine;Taurohyocholate;N-(3alpha,6alpha,7alpha-Trihydroxy-5beta-cholan-24-oyl)taurine	-3.24767522182381;-3.24767522182381;-3.24767522182381;-3.24767522182381;-3.24767522182381;-3.29910223670983;-3.29910223670983	MS1 mz matched	516.294	36.9205	6986.78	7673.12	6796.59	7097.96	7818.53	6208.68	8893.9	8491.34	6733.73	7944.01	6542.15	6384.37	15153.5	4275.87	11356.3	3073.19	5464.89	5767.24	4485.92	3934.09	22954.6	3509.82	3806.86	6144.78	6177.07	5964.4	6710.3	6696.22	11717.4	6960.89	7756.22	3133.26	2717.18	8810.61	11917.5	8561.02	5203.04	4145.05	14785.7	6826.75	5342.57
2304	positive	Taurocholate	0.9662	NA	NA	MS2 forward	516.299	194.271	13761.9	13690	14170.5	12850.6	13465.9	15048.7	11858.4	10453.9	11180.9	15342.2	13421.2	9990.07	8679.19	4737.19	7596.41	5372.63	17814.1	2200.47	4604.57	7138.83	3582.64	8501.72	3008.35	5250.6	16948	5676.42	21075.2	2897.43	4644.59	2644.06	3239.6	6061.83	9786.05	3491.4	6845.79	5120.53	3717.4	5557.41	7096.7	135215	7202.79
2312	positive	Taurodeoxycholic acid	0.9948	NA	NA	MS2 forward	517.329	155.032	54290	54759.7	55257.6	49694.9	47183.7	56820.1	48263.8	57953.4	46934.1	47649.3	42639.7	29322.1	13916.4	14593.9	95881	33492.3	41129.8	15441.2	6266.55	34052.1	29575.8	11104.7	3542.13	14170.5	43784.2	16521	57909.7	11530.6	21681.3	12906.3	3467.22	16710.1	71868	5073.73	43971.7	12822.8	901.034	40678.8	12873.7	319669	17771
2326	positive	NA	NA	NA	NA	Unmapped	518.965	352.443	10279	10865.5	12880.1	12230.4	12731.7	12723.8	11319.5	12346.1	10207.1	10898.5	11298.3	11770.6	13973.5	11488.1	10424.8	11373.4	13103.1	12558.8	10380.6	12085.3	11934.6	12529.9	12329.4	12960.2	13760.8	10553.7	10720.2	11826	14270.6	12670.5	11314	13530.1	10574.5	12643.8	13202.7	12888.8	11800.1	10187	10718.1	10214.2	11852.6
2337	positive	NA	NA	LysoPC(18:2(9Z,12Z));	0.98299261136157;	MS1 mz matched	520.339	188.259	1005352	952747	927941	832455	983679	1145932	1038511	1053608	1198899	1008391	1150378	497891	2411906	985257	509500	479631	529423	1323918	1045395	784671	970781	1298559	1020885	859609	890309	820304	1306100	337606	332847	783967	682901	1065222	1140083	987551	1316133	1841011	2387182	1485767	400237	695604	927440
2339	positive	NA	NA	3-Demethylsimmondsin 2'-(Z)-ferulate;4-Demethylsimmondsin 2'-(E)-ferulate;	-0.186041977348827;-0.186041977348827;	MS1 mz matched	520.507	35.1805	22779.5	20646.7	25713.1	24340.6	19881.6	20861.3	18983.5	25932.1	22706.9	24729.6	22154.9	10683.1	10338.6	18902.8	11230.8	17601.6	21155.1	11329.4	10640	15883.4	9010.06	23465.3	20525.7	9643.59	21172	12463.9	14159.8	10030.5	17083.6	11702.1	11415.9	10287.7	11586.6	15453.3	14474.3	25665.8	12883.5	14326.3	12780.3	30781.6	14126.3
2346	positive	NA	NA	Melleolide D;	14.4942240517257;	MS1 mz matched	521.927	352.392	42409.3	45066.6	46909.1	45144.1	46925.7	47612.6	41641.4	42278.1	43180.9	42653.4	42356.5	53282.6	48213.5	47805.8	43185.6	45475.1	43334.9	49162.7	55496	49890	43841.4	45053.7	49994	44027.8	46207.3	44751.5	42701.2	48926.3	46226.1	48185.7	46527.9	42170.2	39560.9	45865.5	48900	41927.1	47266.5	47387.3	39548.7	48910.5	49686.7
2348	positive	NA	NA	Taurodeoxycholic acid;Taurochenodesoxycholic acid;Tauroursodeoxycholic acid;Taurodeoxycholate;Taurodeoxycholic acid;Taurochenodeoxycholate;Taurochenodeoxycholic acid;Chenodeoxycholoyltaurine;Tauroursodeoxycholic acid	-1.51993776539994;-1.51993776539994;-1.51993776539994;-1.60225340924788;-1.60225340924788;-1.60225340924788	MS1 mz matched	522.284	154.904	20538.7	17646	14667.5	14747.1	21934.1	17020.9	14914.2	16162.3	14322.1	27000.9	11340.5	13437.2	10983.8	6111.02	29910.3	16603	14188.9	5435.93	17193.9	8858.93	7979.61	23204.6	21121.4	13792.2	17365.3	9043.87	18355.7	5842.5	8591.64	5381.26	23457.6	12996.1	29115.2	7370.45	21529	4755.8	15662.1	11213.9	7741.22	61843.8	5753.9
2358	positive	NA	NA	NA	NA	Unmapped	523.046	292.336	2073.1	1721.53	1777.49	1773.62	1905.7	2162.62	1809.31	1987.62	1588.27	1928.08	1965.67	1891.59	2406.7	3367.93	1551.26	1433.94	1755.38	2623.79	1178.89	1288.21	1719.31	1354.15	1490.6	1135.01	2254.45	1964.83	2504.25	2445.63	2157.77	1820.18	3968.69	1451.96	3247.92	1533.1	1830.42	1969.19	1824.6	2101.58	1279.1	1363.61	2372.8
2367	positive	LysoPC(18:0)	0.9842	NA	NA	MS2 forward	524.37	186.406	2065491	1987476	1923148	1710467	2029766	2371601	2022823	2514095	2552613	2151824	2296921	1596407	4755789	975806	805622	1237845	1602889	1400827	2251947	1401421	1314875	2436377	1743296	1736139	2887169	1332848	1003102	828305	641593	1834017	1850238	2281238	1901608	1922252	1172957	1886276	4716265	5434417	920797	1140944	3062034
2368	positive	1-Stearoyl-sn-glycerol 3-phosphocholine	0.9972	NA	NA	MS2 forward	524.37	168.73	1449876	1141964	1417274	1507044	1116056	1292554	1404707	1444888	1372151	1448699	1346816	972454	3359917	680088	446107	838911	1012396	1144085	1839060	1145655	1206189	1359825	665798	1701319	2336903	1319965	1018139	707877	134063	1493174	1543416	1594988	1705891	1000775	879925	1148340	2515298	2790625	737153	970303	2491586
2378	positive	NA	NA	LysoPE(22:6(4Z,7Z,10Z,13Z,16Z,19Z)/0:0);LysoPE(0:0/22:6(4Z,7Z,10Z,13Z,16Z,19Z));Protoverine	2.78077329522325;2.78077329522325;-12.9451366073583	MS1 mz matched	526.292	190.084	32488.9	23814	23790.7	29895.5	25293	29323.8	33633.2	29885.4	37684.3	36435.2	35674.8	20596	26400.2	26396	16656.6	24571.2	14275.6	41531.9	39707.9	42659.4	26106.9	36715.2	23359.2	23593.5	22441.8	39697	31678.1	32912.5	7843.25	51410.2	14371.3	39513.1	36638.5	38431.8	31990.4	25326.2	33039.4	29595.7	17913.3	19098.8	54425.7
[truncated: 321 more rows]
[truncated: 49 more columns]
