# Supplementary material for: Palmitic Acid, A Critical Metabolite, Aggravates Cellular Senescence Through Reactive Oxygen Species Generation in Kawasaki Disease
Source: Front Pharmacol. 2022 Mar 23;13:809157. doi: 10.3389/fphar.2022.809157 (PMC8983937; doi:10.3389/fphar.2022.809157)
Supplement: Supplementary file 2 [file Table1.XLS]

## Sheet: Sheet1
id	model	MS2 name	MS2 score	MS1 name	MS1 ppm	type	mzmed	rtmed
246	negative	L-Phenylalanine	0.9951	NA	NA	MS2 forward	164.072	252.118
539	negative	Indoxyl sulfate	0.9595	NA	NA	MS2 forward	212.002	30.4515
1059	negative	NA	NA	NA	NA	Unmapped	275.999	30.719
2153	negative	NA	NA	dIDP;GF 109203X;Bisindolylmaleimide I	-1.21304312500536;-9.4616583279799	MS1 mz matched	411.181	32.0825
684	negative	NA	NA	N-Phosphohypotaurocyamine;N(omega)-Phosphohypotaurocyamine	19.3089	MS1 mz matched	230.012	32.5995
454	negative	p-CHLOROPHENYLALANINE	0.9191	NA	NA	MS2 forward	198.034	234.733
1828	negative	NA	NA	Cytidine 2',3'-cyclic phosphate;3',5'-Cyclic CMP;Cytidine 3',5'-cyclic monophosphate;2',3'-Cyclic CMP	-14.0515405374705;-14.0964518575047;-14.0964518575047	MS1 mz matched	364.042	294.485
633	negative	D-Quinovose	0.9771	NA	NA	MS2 forward	223.082	206.577
819	negative	NA	NA	N-Phosphotaurocyamine;Taurocyamine phosphate;N(omega)-Phosphotaurocyamine	16.5601	MS1 mz matched	246.007	32.0025
235	negative	3-Hydorxy-3-methylglutaric acid	0.8124	NA	NA	MS2 reverse	161.046	301.068
291	negative	NA	NA	Phenolic phosphate;Phenylphosphate	7.22322	MS1 mz matched	173.01	431.709
3461	negative	NA	NA	C-Toxiferine I;Toxiferine I	-13.7084	MS1 mz matched	613.354	289.865
2362	negative	NA	NA	Austalide J;Mitoxantrone	-8.56207395807183;22.737459559453	MS1 mz matched	443.207	33.119
2176	negative	NA	NA	4-O-Methylmelleolide;Clausarinol;Eplerenone;Armillarin;Armillaripin;Magnoshinin;Eplerenone;Estra-1,3,5(10)-triene-3,6alpha,17beta-triol triacetate;Estra-1,3,5(10)-triene-3,6beta,17beta-triol triacetate	-2.990553655202;-2.990553655202;-2.990553655202;-2.990553655202;-2.990553655202;-2.89712175791514;-2.89712175791514;-2.89712175791514;-2.89712175791514	MS1 mz matched	413.197	35.073
2971	negative	NA	NA	Glycochenodeoxycholate-3-sulfate;N-[(3a,5b,7b)-7-hydroxy-24-oxo-3-(sulfooxy)cholan-24-yl]-Glycine;N-[(3a,5b,7a)-3-hydroxy-24-oxo-7-(sulfooxy)cholan-24-yl]-Glycine;Glycochenodeoxycholate 7-sulfate	-7.44042364167794;-7.44042364167794;-7.44042364167794;-7.36862729451121	MS1 mz matched	528.259	225.335
100	negative	L-Pipecolic acid	0.9368	NA	NA	MS2 forward	128.073	268.744
1001	negative	NA	NA	Sulfamethizole;Sulfamethizole	-9.00399721856373;-8.94104053520363	MS1 mz matched	269.022	46.9105
177	negative	trans-cinnamate	0.6489	NA	NA	MS2 reverse	147.046	252.118
334	negative	NA	NA	NA	NA	Unmapped	181.006	234.731
249	negative	Dihydrothymine	0.9999	NA	NA	MS2 reverse	165.006	155.42
194	negative	Adenine	0.6042	NA	NA	MS2 reverse	151.071	367.367
61	negative	L-Valine	0.9965	NA	NA	MS2 forward	116.073	296.302
2203	negative	NA	NA	NA	NA	Unmapped	419.051	234.736
466	negative	NA	NA	1-(Methylthio)-1-hexanethiol;Butyl propyl disulfide;Butyl isopropyl disulfide;L-Rhamnose;6-Deoxy-L-mannose;L-Mannomethylose;L-Rhamnopyranose;2-Deoxy-D-glucose;2-Deoxy-D-arabino-hexose;D-arabino-2-Deoxyhexose;L-Rhamnulose;6-Deoxy-L-fructose;6-Deoxy-D-galactose;D-Fucose;6-Deoxy-L-galactose;L-Fucose;D-Rhamnose;6-Deoxy-D-mannose;D-Mannomethylose;L-Fuculose;6-Deoxy-L-tagatose;beta-D-Fucose;beta-L-Rham…	-2.08387500104639;-2.08387500104639;-2.08387500104639;3.04750759584062;3.04750759584062;3.04750759584062;3.04750759584062;3.04750759584062;3.04750759584062;3.04750759584062;3.04750759584062;3.04750759584062;3.04750759584062;3.04750759584062;3.047507595840	MS1 mz matched	199.038	206.391
105	negative	Ketoleucine	0.984	NA	NA	MS2 reverse	129.057	73.5795
52	negative	D-Proline	0.9987	NA	NA	MS2 forward	114.058	307.627
797	negative	Pseudouridine	0.9933	NA	NA	MS2 forward	243.061	240.73
986	negative	Inosine	0.9993	NA	NA	MS2 forward	267.072	216.631
324	negative	Alpha-D-Glucose	0.9868	NA	NA	MS2 forward	179.057	300.577
1878	negative	NA	NA	NA	NA	Unmapped	370.007	349.614
154	negative	2-Oxoadipic acid	0.9515	NA	NA	MS2 forward	141.019	349.215
2071	negative	NA	NA	Sunitinib;Desacetoxyvindoline;16-Methoxy-2,3-dihydro-3-hydroxy-N-methyltabersonine;Deacetoxyvindoline;Mitragynine	-2.01977940202971;-24.1072410618075;-24.1072410618075	MS1 mz matched	397.203	31.1965
1962	negative	NA	NA	Kanzonol N;O-Ethylcubebin;Glicoisoflavanone;5,7-Dihydroxy-3',4'-dimethoxy-5'-prenylflavanone;12-Dehydroporson;Schizandrin C;Wuweizisu C	-17.2192489847507;-17.2192489847507;-17.2192489847507;-17.2192489847507;-17.2192489847507;-17.2491841233162	MS1 mz matched	383.151	34.404
3148	negative	NA	NA	NA	NA	Unmapped	555.331	32.047
343	negative	NA	NA	3-Chloro-D-alanine;3-Chloro-L-alanine	18.697864459921;18.697864459921	MS1 mz matched	182.032	284.104
162	negative	D-Threitol	0.8156	NA	NA	MS2 forward	143.036	300.864
1678	negative	NA	NA	Olsalazine;	6.6172797025187;	MS1 mz matched	339.197	27.888
760	negative	NA	NA	11H-Benz[bc]aceanthrylene;4H-Cyclopenta[def]chrysene	-9.50253213422312;-9.50253213422312	MS1 mz matched	239.092	211.956
2254	negative	NA	NA	Austalide L;	-17.7387837386236;	MS1 mz matched	427.212	28.636
181	negative	L-Methionine	0.8835	NA	NA	MS2 forward	148.044	279.596
2613	negative	NA	NA	NA	NA	Unmapped	481.04	48.106
941	negative	NA	NA	NA	NA	Unmapped	260.022	33.804
486	negative	NA	NA	Penmacric acid;ANTU;alpha-phthylthiourea	-8.25946993808427;3.97166139169897	MS1 mz matched	201.057	230.208
3977	negative	NA	NA	SM(d18:0/16:1(9Z));	-7.9348950904312;	MS1 mz matched	737.531	175.146
1560	negative	NA	NA	Robecoxib	-7.27602	MS1 mz matched	326.086	301.183
578	negative	3-Hydroxydodecanoic acid	0.9931	NA	NA	MS2 reverse	215.164	104.915
1555	negative	NA	NA	Acitretin;Isoacitretin;AA861;Docebenone;Moxestrol;11beta-Methoxy-17alpha-ethinylestradiol;17alpha-Ethinyl-11beta-methoxy-1,3,5(10)-estratrien-3,17-diol;Preg-4,16-diene-3,11,20-trione	-18.7161893017182;-18.7161893017182;-18.7324372861707;-18.7324372861707;-18.7324372861707	MS1 mz matched	325.182	28.367
242	negative	Dulcitol	0.7285	NA	NA	MS2 reverse	163.061	206.228
2140	negative	NA	NA	Nigakihemiacetal A;Coleonol;Colforsin;Forskolin	4.99865319623534;4.99865319623534	MS1 mz matched	409.233	248.215
2889	negative	NA	NA	NA	NA	Unmapped	515.3	52.011
495	negative	1-Methylxanthine	0.9262	NA	NA	MS2 reverse	203.001	29.014
101	negative	Citraconic acid	0.9916	NA	NA	MS2 forward	129.02	431.68
757	negative	D-Mannose	0.9495	NA	NA	MS2 reverse	239.076	386.615
112	negative	L-Leucine	0.9923	NA	NA	MS2 forward	130.089	258.954
3666	negative	NA	NA	NA	NA	Unmapped	657.326	192.274
2444	negative	NA	NA	SAICAR;1-(5'-Phosphoribosyl)-5-amino-4-(N-succinocarboxamide)-imidazole;1-(5'-Phosphoribosyl)-4-(N-succinocarboxamide)-5-aminoimidazole;5'-Phosphoribosyl-4-(N-succinocarboxamide)-5-aminoimidazole;(S)-2-[5-Amino-1-(5-phospho-D-ribosyl)imidazole-4-carboxamido]succite;SAICAR	17.676865777581;17.6958057690891	MS1 mz matched	453.082	28.7645
3187	negative	Protoporphyrin IX	0.8114	NA	NA	MS2 reverse	561.251	29.989
497	negative	L-Tryptophan	0.9993	NA	NA	MS2 forward	203.082	254.009
377	negative	NA	NA	5,7-Dihydro-2-methylthieno[3,4-d]pyrimidine;	14.3448319625752;	MS1 mz matched	187.007	28.719
4385	negative	NA	NA	PI(16:1(9Z)/18:1(11Z));PI(18:1(11Z)/16:1(9Z));PI(18:2(9Z,12Z)/16:0);PI(18:0/16:2(9Z,12Z));PI(16:2(9Z,12Z)/18:0);PI(16:0/18:2(9Z,12Z));PI(16:1(9Z)/18:1(9Z));PI(18:1(9Z)/16:1(9Z));	-16.5420883556001;-16.5420883556001;-16.5420883556001;-16.5420883556001;-16.5420883556001;-16.5420883556001;-16.5420883556001;-16.5420883556001;	MS1 mz matched	833.512	189.071
3516	negative	NA	NA	Glycochenodeoxycholic acid 3-glucuronide;	-8.33378359720511;	MS1 mz matched	624.334	331.455
723	negative	NA	NA	Pterosin F;Carbamazepine;Glycosminine;alpha-(p-Methoxyphenyl)-3-pyridineacrylonitrile;alpha-(p-Methoxyphenyl)-2-pyridineacrylonitrile	-0.119018982271974;7.47495711467614;7.47495711467614;7.47495711467614;7.47495711467614	MS1 mz matched	235.097	306.668
188	negative	3-Methylphenylacetic acid	0.8563	NA	NA	MS2 forward	149.061	90.083
300	negative	L-Citrulline	0.9921	NA	NA	MS2 forward	174.089	383.885
171	negative	L-Glutamate	0.9972	NA	NA	MS2 forward	146.047	389.262
423	negative	NA	NA	NA	NA	Unmapped	194.928	420.896
4611	negative	NA	NA	NA	NA	Unmapped	888.982	349.033
258	negative	NA	NA	NA	NA	Unmapped	165.092	87.271
1193	negative	NA	NA	NA	NA	Unmapped	288.006	349.172
2251	negative	NA	NA	IDP;Pseudorhodomyrtoxin;psi-Rhodomyrtoxin	-23.1721782525237;-17.5672346085136	MS1 mz matched	427.176	33.773
2356	negative	NA	NA	Dihydrozeatin-9-N-glucoside;Dihydrozeatin-7-N-dihydrozeatin;Dihydrozeatin-O-glucoside;Dihydrozeatin-O-glucoside	-11.7010134699213;-11.7010134699213;-11.7010134699213;-11.7438126418418	MS1 mz matched	442.189	300.993
339	negative	D-Mannitol	0.9786	NA	NA	MS2 forward	181.071	296.042
4323	negative	NA	NA	Periandrin I;Glycyrrhizin;Licoricesaponin K2;Uralsaponin B;Glycyrrhizite;Glycyrrhizin;Glycyrrhizic acid;(3beta,20beta)-20-Carboxy-11-oxo-30-norolean-12-en-3-yl 2-O-beta-D-glucuronosyl-beta-D-glucosiduronic acid	-9.46724727382413;-9.46724727382413;-9.46724727382413;-9.46724727382413;-9.48439197397726	MS1 mz matched	821.39	367.546
3278	negative	NA	NA	Taurochenodeoxycholate-7-sulfate;Taurochenodeoxycholate-3-sulfate;	-7.89533325307337;-7.89533325307337;	MS1 mz matched	578.241	190.664
2152	negative	NA	NA	O-Deethylated candesartan;Eupachlorin	-5.68657745009014;-6.92792958707593	MS1 mz matched	411.126	328.521
167	negative	L-Glutamine	0.9952	NA	NA	MS2 forward	145.063	366.081
3191	negative	NA	NA	NA	NA	Unmapped	561.484	39.067
2304	negative	NA	NA	Glutathionylspermidine;N1-(gamma-L-Glutamyl-L-cysteinyl-glycyl)-spermidine	2.36994	MS1 mz matched	433.232	246.248
2761	negative	NA	NA	LPA(18:0/0:0);LPA(0:0/18:0);	-21.9957969633747;-21.9957969633747;	MS1 mz matched	497.29	31.691
2937	negative	D-Mannitol 1-phosphate	0.7003	NA	NA	MS2 reverse	523.305	31.2
1092	negative	Thymidine	0.7778	NA	NA	MS2 reverse	279.038	164.066
2170	negative	NA	NA	NA	NA	Unmapped	412.963	27.2295
1625	negative	NA	NA	NA	NA	Unmapped	333.005	29.783
378	negative	NA	NA	Isoplumbagin;Pydanon;Hexahydro-4-hydroxy-3,6-dioxopyridazine-4-acetic acid	-24.3358927609366;-2.83019921465309	MS1 mz matched	187.043	224.583
1864	negative	NA	NA	Testosterone sulfate;Epitestosterone sulfate;Dehydroepiandrosterone sulfate;Dehydroepiandrosterone sulfate;3beta-Hydroxyandrost-5-en-17-one 3-sulfate;DHEA sulfate	-2.02273028032822;-2.02273028032822;-2.02273028032822;-1.90131780335543	MS1 mz matched	367.156	29.374
134	negative	Hypoxanthine	0.9868	NA	NA	MS2 forward	135.032	170.28
405	negative	NA	NA	NA	NA	Unmapped	191.108	306.887
796	negative	Uridine	0.6476	NA	NA	MS2 forward	243.061	163.994
2842	negative	NA	NA	AFN911;	-24.5923103126025;	MS1 mz matched	510.248	184.048
2701	negative	NA	NA	Atrovirinone;5,10-Methenyltetrahydrofolate	-16.260962178253;17.0991434643889	MS1 mz matched	491.137	33.46
97	negative	L-Pyroglutamic acid	0.9844	NA	NA	MS2 forward	128.037	294.789
3181	negative	1-Stearoyl-sn-glycerol 3-phosphocholine	0.7958	NA	NA	MS2 reverse	560.326	170.436
442	negative	NA	NA	NA	NA	Unmapped	197.032	155.358
2039	negative	NA	NA	Cefdinir;Cefdinir	-9.5373632100772;-9.51230242928414	MS1 mz matched	394.032	234.731
4584	negative	NA	NA	PI(20:3(8Z,11Z,14Z)/18:2(9Z,12Z));PI(18:1(11Z)/20:4(5Z,8Z,11Z,14Z));PI(22:5(7Z,10Z,13Z,16Z,19Z)/16:0);PI(18:2(9Z,12Z)/20:3(5Z,8Z,11Z));PI(22:5(4Z,7Z,10Z,13Z,16Z)/16:0);PI(18:1(9Z)/20:4(8Z,11Z,14Z,17Z));PI(18:1(11Z)/20:4(8Z,11Z,14Z,17Z));PI(16:0/22:5(4Z,7Z,10Z,13Z,16Z));PI(20:4(5Z,8Z,11Z,14Z)/18:1(11Z));PI(16:0/22:5(7Z,10Z,13Z,16Z,19Z));PI(20:4(8Z,11Z,14Z,17Z)/18:1(9Z));PI(20:3(5Z,8Z,11Z)/18:2(9Z,…	-15.870595478201;-15.870595478201;-15.870595478201;-15.870595478201;-15.870595478201;-15.870595478201;-15.870595478201;-15.870595478201;-15.870595478201;-15.870595478201;-15.870595478201;-15.870595478201;-15.870595478201;-15.870595478201;-15.870595478201;	MS1 mz matched	883.527	185.191
4433	negative	NA	NA	NA	NA	Unmapped	844.598	40.343
887	negative	NA	NA	Anagrelide;8-Dehydroxythiemycin;8-Deshydroxythiemycin;Deshydroxythiemycin;NS-5;C20823;Carbapenem biosynthesis intermediate 4	3.90490768788992;3.12392371076277;3.12392371076277	MS1 mz matched	255.086	308.583
2882	negative	Taurocholate	1	NA	NA	MS2 forward	514.28	193.417
622	negative	NA	NA	1-Benzyl-1,2,3,4-tetrahydroisoquinoline;(R,S)-Tetrahydrobenzylisoquinoline;(RS)-1-Benzyl-1,2,3,4-tetrahydroisoquinoline	-9.30194623220052;-9.30418699623541	MS1 mz matched	222.134	270.758
3528	negative	NA	NA	Zizyphine A	-18.4831	MS1 mz matched	627.369	278.709
79	negative	Taurine	0.9997	NA	NA	MS2 forward	124.009	291.322
2767	negative	Taurochenodeoxycholate	1	NA	NA	MS2 forward	498.286	156.062
200	negative	NA	NA	NA	NA	Unmapped	154.026	155.501
960	negative	Alpha-N-Phenylacetyl-L-glutamine	0.9953	NA	NA	MS2 forward	263.102	215.245
1898	negative	NA	NA	Lepidimoic acid;Dinitramine	0.00993511134261992;3.41520617429303	MS1 mz matched	374.091	339.394
2269	negative	NA	NA	Coumestrin;Daidzein 4'-O-glucuronide;Daidzein 7-O-glucuronide;Benzofep	4.87177106093457;4.87177106093457;4.87177106093457;16.2574802056403	MS1 mz matched	429.092	164.044
3661	negative	NA	NA	NA	NA	Unmapped	656.468	39.041
2372	negative	NA	NA	Porson;Gingerenone B;Isogingerenone B;Burseran;(+)-Burseran;(+)-Eudesmin;Pinoresinol dimethyl ether	0.158996122864972;0.158996122864972;0.158996122864972;0.258951366019982;0.258951366019982	MS1 mz matched	445.186	51.377
2591	negative	NA	NA	NA	NA	Unmapped	477.264	27.9395
4981	negative	NA	NA	NA	NA	Unmapped	1067	349.095
2833	negative	NA	NA	NA	NA	Unmapped	509.289	31.939
166	negative	alpha-ketoglutarate	0.8001	NA	NA	MS2 reverse	145.015	361.233
3365	negative	NA	NA	NA	NA	Unmapped	593.474	38.443
471	negative	Dodecanoic acid	0.999	NA	NA	MS2 forward	199.17	52.23
1843	negative	NA	NA	Tetrahydropentoxyline;Semilepidinoside B;1alpha,5alpha-Epidithio-17a-oxa-D-homoandrostan-3,17-dione	-6.9087817192666;-6.9087817192666;21.4990592199092	MS1 mz matched	365.14	30.5715
2019	negative	Deoxycholic acid	0.6169	NA	NA	MS2 forward	391.282	55.2375
2049	negative	pregnenolone sulfate	0.9662	NA	NA	MS2 forward	395.187	28.6115
4490	negative	NA	NA	PI(18:1(9Z)/18:3(9Z,12Z,15Z));PI(16:0/20:4(5Z,8Z,11Z,14Z));PI(18:3(9Z,12Z,15Z)/18:1(9Z));PI(18:3(9Z,12Z,15Z)/18:1(11Z));PI(20:4(8Z,11Z,14Z,17Z)/16:0);PI(18:1(11Z)/18:3(9Z,12Z,15Z));PI(18:1(11Z)/18:3(6Z,9Z,12Z));PI(16:0/20:4(8Z,11Z,14Z,17Z));PI(18:3(6Z,9Z,12Z)/18:1(11Z));PI(20:4(5Z,8Z,11Z,14Z)/16:0);PI(18:1(9Z)/18:3(6Z,9Z,12Z));PI(18:3(6Z,9Z,12Z)/18:1(9Z));PI(18:2(9Z,12Z)/18:2(9Z,12Z));	-16.0216495926274;-16.0216495926274;-16.0216495926274;-16.0216495926274;-16.0216495926274;-16.0216495926274;-16.0216495926274;-16.0216495926274;-16.0216495926274;-16.0216495926274;-16.0216495926274;-16.0216495926274;-16.0216495926274;	MS1 mz matched	857.512	186.294
1920	negative	NA	NA	Steviol;Yucalexin B22;15-HEPE;11R-HEPE;Phytocassane C;Atractyligenin;Yucalexin B20;Yucalexin A19;15-KETE;Leukotriene A4;2-Hydroxy-6-(8-tridecenyl)benzoic acid;17,18-EpETE;Ineketone;Oxymesterone;9-HEPE;12alpha-12-Hydroxy-7,13-abietadien-18-oic acid;18R-HEPE;12-KETE;Aframodial;14,15-EpETE;12-HEPE;5-HEPE;(ent-15beta)-15-Hydroxy-19-trachylobanoic acid;Grandiflorolic acid;(ent-15beta)-15,19-Dihydroxy-…	17.3000086103335;17.3000086103335;17.3000086103335;17.3000086103335;17.3000086103335;17.3000086103335;17.3000086103335;17.3000086103335;17.3000086103335;17.3000086103335;17.3000086103335;17.3000086103335;17.3000086103335;17.3000086103335;17.3000086103335;17.3000086103335;17.3000086103335;17.3000086103335;17.3000086103335;17.3000086103335;17.3000086103335;17.3000086103335;17.3000086103335;17.30000…	MS1 mz matched	377.233	47.073
1223	negative	N-Acetylneuraminic acid	0.8485	NA	NA	MS2 forward	290.087	514.804
4593	negative	NA	NA	PI(20:4(5Z,8Z,11Z,14Z)/18:0);PI(20:3(5Z,8Z,11Z)/18:1(9Z));PI(18:1(11Z)/20:3(8Z,11Z,14Z));PI(20:4(8Z,11Z,14Z,17Z)/18:0);PI(18:1(9Z)/20:3(8Z,11Z,14Z));PI(18:1(9Z)/20:3(5Z,8Z,11Z));PI(16:0/22:4(7Z,10Z,13Z,16Z));PI(18:0/20:4(8Z,11Z,14Z,17Z));PI(20:2(11Z,14Z)/18:2(9Z,12Z));PI(20:3(8Z,11Z,14Z)/18:1(9Z));PI(18:2(9Z,12Z)/20:2(11Z,14Z));PI(20:3(8Z,11Z,14Z)/18:1(11Z));PI(22:4(10Z,13Z,16Z,19Z)/16:0);PI(16:0…	-8.0415573508691;-8.0415573508691;-8.0415573508691;-8.0415573508691;-8.0415573508691;-8.0415573508691;-8.0415573508691;-8.0415573508691;-8.0415573508691;-8.0415573508691;-8.0415573508691;-8.0415573508691;-8.0415573508691;-8.0415573508691;-8.0415573508691;	MS1 mz matched	885.544	185.044
2926	negative	NA	NA	Metabolite M6;	8.4878902916078;	MS1 mz matched	521.325	27.894
2801	negative	NA	NA	2-Decarboxybetanin;Polyoxin B	-20.673296999689;12.028120562789	MS1 mz matched	506.147	301.1
1230	negative	EDTA	0.8292	NA	NA	MS2 forward	291.09	514.864
519	negative	L-Kynurenine	0.9978	NA	NA	MS2 forward	207.077	257.2
2483	negative	NA	NA	NA	NA	Unmapped	461.029	32.4735
305	negative	N-Formylmethionine	0.6657	NA	NA	MS2 forward	176.039	193.758
285	negative	Capric acid	0.985	NA	NA	MS2 forward	171.139	40.294
467	negative	L-homocysteic acid	0.9739	NA	NA	MS2 reverse	199.036	155.352
3926	negative	NA	NA	NA	NA	Unmapped	723.516	176.039
3017	negative	NA	NA	NA	NA	Unmapped	535.468	38.7345
2629	negative	NA	NA	NA	NA	Unmapped	483.01	32.4535
396	negative	NA	NA	Nitroxoline;4-Nitroquinoline N-oxide;4-Nitroquinoline 1-oxide;Nitrochin	14.1245552482753;14.3460932509542	MS1 mz matched	189.041	235.383
3586	negative	NA	NA	Isorhamnetin 3-beta-laminaribioside;Rhamnetin 3-sophoroside;Sexangularetin 3-sophoroside;Ranupenin 3-rutinoside;Rhamnetin 3-laminaribioside;3-Methylquercetin 7-[galactosyl-(1-&gt;4)-glucoside];Dactylin;	11.3436480114747;11.3436480114747;11.3436480114747;11.3436480114747;11.3436480114747;11.3436480114747;11.3436480114747;	MS1 mz matched	639.551	37.741
1382	negative	NA	NA	dCMP;dCMP;Deoxycytidylic acid;Deoxycytidine monophosphate;Deoxycytidylate;2'-Deoxycytidine 5'-monophosphate	19.7478033651902;19.8660248312399	MS1 mz matched	306.056	240.707
187	negative	3-Phenylpropanoic acid	0.7542	NA	NA	MS2 forward	149.061	107.118
2813	negative	NA	NA	NA	NA	Unmapped	507.274	30.5465
2430	negative	NA	NA	NA	NA	Unmapped	452.009	349.191
1398	negative	NA	NA	N-Acetyl-a-neuraminic acid;N-Acetylneuraminic acid;N-Acetylneuramite;N-Acetylneuraminic acid;5-Acetamido-3,5-dideoxy-D-glycero-D-galacto-2-nonulosonic acid;Neu5Ac;O-Acetylneuraminic acid;O-Acetylated sialic acid;N-Acetyl-alpha-neuramite;alpha-Neu5Ac;N-Acetyl-beta-neuramite;beta-Neu5Ac;N-Glycolylmuramic acid;2-Glycolylamido-3-O-[(R)-1-carboxyethyl]-2-deoxy-D-glucopyranose	-6.40945216361541;-6.40945216361541;-6.47027233379342;-6.47027233379342;-6.47027233379342;-6.47027233379342;-6.47027233379342	MS1 mz matched	308.097	294.863
1020	negative	NA	NA	(E)-2-Propenyl [3-(2-propenylthio)-2-propenyl] sulfate;4,4'-Sulfonyldiphenol;Bisphenol S;1,1'-Sulfonylbis(4-hydroxybenzene)	-17.3988789686617;-3.99952005761219	MS1 mz matched	271.003	290.765
289	negative	NA	NA	NA	NA	Unmapped	172.992	29.1855
191	negative	Xanthine	0.9946	NA	NA	MS2 forward	151.027	214.802
4430	negative	NA	NA	Halstoctacosanolide A	14.1009	MS1 mz matched	843.546	40.3
1959	negative	NA	NA	NA	NA	Unmapped	383.01	163.994
3073	negative	NA	NA	Physagulin C;	16.5419526367813;	MS1 mz matched	541.261	277.66
4266	negative	NA	NA	NA	NA	Unmapped	806.978	349.036
3770	negative	NA	NA	NA	NA	Unmapped	686.011	349.039
4516	negative	NA	NA	NA	NA	Unmapped	864.569	40.3
317	negative	Hippuric acid	0.9904	NA	NA	MS2 forward	178.051	189.715
630	negative	NA	NA	Quinoclamin	-3.3815	MS1 mz matched	223.02	349.178
346	negative	NA	NA	NA	NA	Unmapped	182.032	246.254
2743	negative	NA	NA	Yuccaol A;Oxytetracycline hydrochloride;OTC	-5.74261069483401;-24.0491860014227	MS1 mz matched	495.113	164.051
4576	negative	NA	NA	Elatoside E;Pitheduloside B;	15.4760745688175;15.4760745688175;	MS1 mz matched	881.511	185.64
1306	negative	3'-O-methyladenosine	0.9993	NA	NA	MS2 reverse	297.137	366.516
841	negative	NA	NA	(E)-2-Propenyl [3-(2-propenylthio)-2-propenyl] sulfate;4,4'-Sulfonyldiphenol;Bisphenol S;1,1'-Sulfonylbis(4-hydroxybenzene)	-17.3988789686617;-3.99952005761219	MS1 mz matched	249.021	290.897
2400	negative	Glycochenodeoxycholate	0.9063	NA	NA	MS2 forward	448.304	200.968
2411	negative	NA	NA	NA	NA	Unmapped	449.359	105.158
299	negative	N-Acetyl-L-aspartic acid	0.933	NA	NA	MS2 forward	174.041	385.187
4923	negative	NA	NA	NA	NA	Unmapped	1036.79	39.683
813	negative	NA	NA	3-Methyl-1-(2,4,6-trihydroxyphenyl)-1-butanone;Sinapyl alcohol;2'-Hydroxy-4',6'-dimethoxy-3'-methylacetophenone;Bancroftinone;3-(4-Hydroxy-3-methoxyphenyl)-2-methylpropionic acid;3,4-Dihydroxyphenylvaleric acid;5-(3',5')-Dihydroxyphenyl-gamma-valerolactone;2-Methoxy-3-(4-methoxyphenyl)propanoic acid;2-Methoxy-4-(4-methyl-1,3-dioxolan-2-yl)phenol;Phosphoagmatine;Agmatine phosphate	-10.5141049917077;-10.5141049917077;-10.5141049917077;-10.5141049917077;-10.5141049917077;-10.5141049917077;-10.5141049917077;-10.5141049917077;-10.5141049917077;-5.71188672191686	MS1 mz matched	245.048	27.817
3223	negative	NA	NA	Adouetine Y;Ceanothine E;Protoporphyrinogen IX;Protoporphyrinogen IX;Adouetine Y;Cretine A	12.0220665511264;12.0220665511264;12.0220665511264;11.9442904778748;11.9442904778748;11.9442904778748	MS1 mz matched	567.312	338.248
2196	negative	1-Stearoyl-sn-glycerol	0.9993	NA	NA	MS2 reverse	417.319	35.321
399	negative	5-Hydroxyindoleacetate	0.949	NA	NA	MS2 forward	190.051	257.335
1000	negative	NA	NA	NA	NA	Unmapped	268.996	48.7545
332	negative	L-Tyrosine	0.9631	NA	NA	MS2 forward	180.066	296.554
312	negative	L-Gulonic gamma-lactone	0.8728	NA	NA	MS2 forward	177.041	302.724
3002	negative	NA	NA	NA	NA	Unmapped	533.452	38.99
3331	negative	NA	NA	NA	NA	Unmapped	589.227	286.639
1379	negative	NA	NA	2-(3,4-Dihydroxybenzoyloxy)-4,6-dihydroxybenzoate;Oxandrolone;3alpha,11beta-Dihydroxy-5beta-androstane-17-one;11beta-Hydroxyetiocholanolone;3alpha,11beta-Dihydroxy-5alpha-androstane-17-one;11beta-Hydroxyandrosterone;Androst-5-ene-3beta,17beta,19-triol;3beta-Hydroxy-D-homo-17a-oxa-5alpha-androstan-17-one;Isoandrololactone;Dihydromocolin L	-1.30623163932488;14.6953410870545;14.6953410870545;14.6953410870545;14.6953410870545;14.6953410870545;14.6953410870545	MS1 mz matched	305.213	31.806
415	negative	D-Glucuronate	0.9791	NA	NA	MS2 forward	193.035	381.176
4609	negative	NA	NA	NA	NA	Unmapped	888.555	185.531
42	negative	Uracil	0.9957	NA	NA	MS2 forward	111.021	92.3985
3981	negative	NA	NA	2,2',3,4,4',5',6-Heptabromodiphenyl ether;	4.15236407918428;	MS1 mz matched	738.502	39.061
2488	negative	NA	NA	Kaempferol 3-glucuronide;3-Methylellagic acid 8-rhamnoside;	-3.01085473589934;-3.01085473589934;	MS1 mz matched	461.359	37.7205
620	negative	N-Acetyl-L-tyrosine	0.9931	NA	NA	MS2 forward	222.076	215.213
4667	negative	NA	NA	PI(18:0/22:6(4Z,7Z,10Z,13Z,16Z,19Z));PI(22:6(4Z,7Z,10Z,13Z,16Z,19Z)/18:0);PI(20:3(8Z,11Z,14Z)/20:3(8Z,11Z,14Z));PI(22:3(10Z,13Z,16Z)/18:3(9Z,12Z,15Z));PI(22:3(10Z,13Z,16Z)/18:3(6Z,9Z,12Z));PI(18:3(9Z,12Z,15Z)/22:3(10Z,13Z,16Z));PI(20:3(8Z,11Z,14Z)/20:3(5Z,8Z,11Z));PI(20:3(5Z,8Z,11Z)/20:3(5Z,8Z,11Z));PI(18:3(6Z,9Z,12Z)/22:3(10Z,13Z,16Z));PI(20:3(5Z,8Z,11Z)/20:3(8Z,11Z,14Z));Bacteriochlorophyll a	-18.1942455524778;-18.1942455524778;-18.1942455524778;-18.1942455524778;-18.1942455524778;-18.1942455524778;-18.1942455524778;-18.1942455524778;-18.1942455524778;-18.1942455524778;-5.86197796284805	MS1 mz matched	909.541	184.187
3931	negative	NA	NA	PC(14:1(9Z)/18:3(6Z,9Z,12Z));PC(18:3(6Z,9Z,12Z)/14:1(9Z));PC(18:3(9Z,12Z,15Z)/14:1(9Z));PE(15:0/20:4(5Z,8Z,11Z,14Z));PE(20:4(5Z,8Z,11Z,14Z)/15:0);PE(20:4(8Z,11Z,14Z,17Z)/15:0);PC(14:1(9Z)/18:3(9Z,12Z,15Z));PC(14:0/18:4(6Z,9Z,12Z,15Z));PE(15:0/20:4(8Z,11Z,14Z,17Z));PC(18:4(6Z,9Z,12Z,15Z)/14:0);	1.70005783943195;1.70005783943195;1.70005783943195;1.70005783943195;1.70005783943195;1.70005783943195;1.70005783943195;1.70005783943195;1.70005783943195;1.70005783943195;	MS1 mz matched	724.976	349.013
3733	negative	NA	NA	Jesaconitine	-3.70192	MS1 mz matched	674.315	306.113
474	negative	Cysteine-S-sulfate	0.994	NA	NA	MS2 forward	199.969	302.063
2888	negative	NA	NA	Ganoderic acid delta;Ganoderenic acid C;Ganoderic acid epsilon;Ganoderic acid B;Cucurbitacin D;Ganoderic acid A;L-Olivosyl-oleandolide	-16.2799889641929;-16.2799889641929;-16.2799889641929;-16.2799889641929;-16.2799889641929;-16.2799889641929;13.3612012084387	MS1 mz matched	515.3	35.728
4498	negative	NA	NA	NA	NA	Unmapped	860.475	57.91
4031	negative	NA	NA	NA	NA	Unmapped	746.506	39.061
4449	negative	NA	NA	PG(18:0/22:4(7Z,10Z,13Z,16Z));	-11.3546014430425;	MS1 mz matched	847.528	188.51
2565	negative	NA	NA	Sildenafil;Sildefil	19.4848250797412;19.5358588660161	MS1 mz matched	473.214	36.391
1373	negative	NA	NA	NA	NA	Unmapped	305.022	349.07
1355	negative	N-Acetylaspartylglutamate (NAAG)	0.9846	NA	NA	MS2 forward	303.082	434.746
2099	negative	Galactinol	0.7072	NA	NA	MS2 forward	401.126	360.212
2341	negative	NA	NA	Hexamethylquercetagetin;3,3',4',5,7,8-Hexamethoxyflavone;Chrysaloin;Nobiletin;3,3',4',5,6,8-Hexamethoxyflavone;Saphemycin	-18.5702950397325;-18.5702950397325;-18.5702950397325;-18.5702950397325;-18.5702950397325;5.96834390399031	MS1 mz matched	439.066	29.582
3033	negative	NA	NA	Terpendole J	-2.11005	MS1 mz matched	537.321	30.9235
267	negative	Uric acid	0.9934	NA	NA	MS2 forward	167.022	323.76
924	negative	O-Phospho-L-threonine	0.783	NA	NA	MS2 reverse	258.043	33.1005
4762	negative	NA	NA	PC(24:0/22:2(13Z,16Z));PC(22:2(13Z,16Z)/24:0);PC(24:1(15Z)/22:1(13Z));PC(22:1(13Z)/24:1(15Z));	-13.9949237035503;-13.9949237035503;-13.9949237035503;-13.9949237035503;	MS1 mz matched	962.678	39.7075
2293	negative	NA	NA	Diphenhydramine N-glucuronide;Inflexin;3beta,11beta-Diacetoxy-1alpha-hydroxykaura-16-ene-6,15-dione;Grandisin;Magnosalicin;Schizandrin	11.5080387972265;-17.5813044810242;-17.5813044810242;-17.5813044810242;-17.5813044810242	MS1 mz matched	431.207	63.201
2659	negative	NA	NA	NA	NA	Unmapped	486.212	30.698
3146	negative	NA	NA	Cucurbitacin E	-15.795	MS1 mz matched	555.295	33.7515
1987	negative	NA	NA	NA	NA	Unmapped	387.023	349.048
4533	negative	NA	NA	NA	NA	Unmapped	868.598	40.306
3641	negative	NA	NA	NA	NA	Unmapped	650.202	32.4085
3274	negative	NA	NA	Anhydroamarouciaxanthin B;Asparagoside A;(25S)-5beta-Spirostan-3beta-ol 3-O-beta-D-glucoside;Timosaponin A-I	0.00778040576857788;-10.2008724685142;-10.2008724685142	MS1 mz matched	577.369	175.231
2705	negative	NA	NA	NA	NA	Unmapped	491.279	28.393
692	negative	NA	NA	NA	NA	Unmapped	231.023	389.284
4137	negative	NA	NA	PE(22:6(4Z,7Z,10Z,13Z,16Z,19Z)/P-18:1(11Z));PE(P-18:1(11Z)/22:6(4Z,7Z,10Z,13Z,16Z,19Z));PE(22:6(4Z,7Z,10Z,13Z,16Z,19Z)/P-18:1(9Z));PE(P-18:1(9Z)/22:6(4Z,7Z,10Z,13Z,16Z,19Z));	-16.8034855561634;-16.8034855561634;-16.8034855561634;-16.8034855561634;	MS1 mz matched	772.523	136.57
3004	negative	NA	NA	Glyburide;	-22.2670261779745;	MS1 mz matched	534.011	349.252
185	negative	D-Xylulose	0.754	NA	NA	MS2 forward	149.046	301.208
212	negative	Allantoin	0.9779	NA	NA	MS2 forward	157.037	185.421
3141	negative	NA	NA	NA	NA	Unmapped	555.02	28.569
1922	negative	NA	NA	Gonyautoxin V;Gonyautoxin 5;Gonyautoxin V;GTX5;Toxin B1	5.10246857697831;5.14625775868351	MS1 mz matched	378.093	301.105
2407	negative	NA	NA	Laserpitin	0.444186	MS1 mz matched	449.25	180.075
196	negative	Creatine	0.7591	NA	NA	MS2 reverse	152.045	341.935
1145	negative	NA	NA	DTP;(2,4-Dichlorophenyl)(5-hydroxy-1,3-dimethyl-1H-pyrazol-4-yl)methanone;4-(2,4-Dichlorobenzoyl)-1,3-dimethyl-5-hydroxypyrazole	0.352098	MS1 mz matched	283.009	234.74
1685	negative	Trehalose	0.9605	NA	NA	MS2 forward	341.106	360.084
3854	negative	NA	NA	Adenosine thiamine diphosphate;	-14.8249177216932;	MS1 mz matched	709.5	176.863
1263	negative	NA	NA	Norfluoxetine;Mecambrine;(+)-Mecambroline;Pukateine;Xylopine;Japonine	-2.23537401500821;-10.3716850861747;-10.3716850861747;-10.3716850861747;-10.3716850861747;-10.3716850861747	MS1 mz matched	294.118	304.85
1743	negative	NA	NA	9-(beta-D-Ribofuranosyl)zeatin;O-beta-D-Xylosylzeatin;O-beta-D-Xyloxylzeatin;trans-Zeatin riboside;cis-Zeatin riboside	2.08227569740288;1.99342568208567;1.99342568208567;1.99342568208567	MS1 mz matched	350.148	170.559
1808	negative	NA	NA	Pyriminobac-methyl;Pyriminobac-methyl	-0.637171284305988;-0.677600204238451	MS1 mz matched	360.127	297.361
4900	negative	NA	NA	CDP-DG(18:1(11Z)/20:4(5Z,8Z,11Z,14Z));CDP-DG(18:1(11Z)/20:4(8Z,11Z,14Z,17Z));CDP-DG(18:1(9Z)/20:4(5Z,8Z,11Z,14Z));CDP-DG(18:1(9Z)/20:4(8Z,11Z,14Z,17Z));	-19.4077069531283;-19.4077069531283;-19.4077069531283;-19.4077069531283;	MS1 mz matched	1026.5	349.072
1477	negative	NA	NA	SC-57666	-23.0944	MS1 mz matched	315.079	388.968
3950	negative	NA	NA	DG(22:0/20:0/0:0);DG(18:0/24:0/0:0);DG(20:0/22:0/0:0);DG(18:0/0:0/24:0);DG(20:0/0:0/22:0);DG(24:0/18:0/0:0);	9.58857673371107;9.58857673371107;9.58857673371107;9.58857673371107;9.58857673371107;9.58857673371107;	MS1 mz matched	730.156	33.695
1162	negative	N4-Acetylcytidine	0.9309	NA	NA	MS2 forward	284.087	165.458
1627	negative	Nicotinamide ribotide	0.7469	NA	NA	MS2 reverse	333.057	428.001
4002	negative	NA	NA	PE(16:0/20:2(11Z,14Z));PE(18:0/18:2(9Z,12Z));PE(18:2(9Z,12Z)/18:0);PE(18:1(9Z)/18:1(9Z));PE(18:1(9Z)/18:1(11Z));PE(16:1(9Z)/20:1(11Z));PE(18:1(11Z)/18:1(11Z));PE(22:1(13Z)/14:1(9Z));PE(20:2(11Z,14Z)/16:0);PE(18:1(11Z)/18:1(9Z));PC(18:2(9Z,12Z)/15:0);PE(14:1(9Z)/22:1(13Z));PE(14:0/22:2(13Z,16Z));PE(22:2(13Z,16Z)/14:0);PC(15:0/18:2(9Z,12Z));PE(20:1(11Z)/16:1(9Z));	-8.74861216658001;-8.74861216658001;-8.74861216658001;-8.74861216658001;-8.74861216658001;-8.74861216658001;-8.74861216658001;-8.74861216658001;-8.74861216658001;-8.74861216658001;-8.74861216658001;-8.74861216658001;-8.74861216658001;-8.74861216658001;-8.	MS1 mz matched	742.534	143.641
2064	negative	NA	NA	Sulfasalazine;Sulfasalazine;Salicylazosulfapyridine;Salazosulfapyridine	2.69225026880087;2.66788253792298	MS1 mz matched	397.07	234.726
280	negative	NA	NA	Allopurinol;Hypoxanthine;Hypoxanthine;Purine-6-ol	3.59604054101167;3.59604054101167;3.67543011712255	MS1 mz matched	171.008	170.163
3347	negative	NA	NA	iso-A2E(9,13-di-cis);iso-A2E(11-cis);iso-A2E(13-cis);N-Retinylidene-N-retinylethanolamine;iso-A2E(9-cis);	9.78763099988027;9.78763099988027;9.78763099988027;9.78763099988027;9.78763099988027;	MS1 mz matched	591.458	153.984
1935	negative	NA	NA	Sunitinib;Desacetoxyvindoline;16-Methoxy-2,3-dihydro-3-hydroxy-N-methyltabersonine;Deacetoxyvindoline;Mitragynine	-2.01977940202971;-24.1072410618075;-24.1072410618075	MS1 mz matched	379.192	33.785
4267	negative	NA	NA	Hebevinoside I;	-1.37415426183951;	MS1 mz matched	807.496	189.801
3016	negative	NA	NA	Halofantrine;	-9.99152718493808;	MS1 mz matched	535.396	154.65
3295	negative	NA	NA	LysoPC(20:4(8Z,11Z,14Z,17Z));LysoPC(20:4(5Z,8Z,11Z,14Z));	19.344508570952;19.344508570952;	MS1 mz matched	580.296	184.311
4376	negative	NA	NA	Lankamycin	15.1578	MS1 mz matched	831.495	189.06
1050	negative	NA	NA	Ethenodeoxyadenosine;Cardiospermin;Sarmentosin;2-Butenenitrile,4-(beta-D-glucopyranosyloxy)-2-(hydroxymethyl)-, (E)-;1,6-Anhydro-N-acetyl-beta-muramate	4.06722108016994;8.93564351928915;8.93564351928915;8.93564351928915	MS1 mz matched	274.103	421.494
4574	negative	NA	NA	PC(22:5(4Z,7Z,10Z,13Z,16Z)/22:5(4Z,7Z,10Z,13Z,16Z));PC(22:5(4Z,7Z,10Z,13Z,16Z)/22:5(7Z,10Z,13Z,16Z,19Z));PC(22:4(7Z,10Z,13Z,16Z)/22:6(4Z,7Z,10Z,13Z,16Z,19Z));PC(22:5(7Z,10Z,13Z,16Z,19Z)/22:5(4Z,7Z,10Z,13Z,16Z));PC(22:6(4Z,7Z,10Z,13Z,16Z,19Z)/22:4(7Z,10Z,13Z,16Z));PC(22:5(7Z,10Z,13Z,16Z,19Z)/22:5(7Z,10Z,13Z,16Z,19Z));	4.30379783066218;4.30379783066218;4.30379783066218;4.30379783066218;4.30379783066218;4.30379783066218;	MS1 mz matched	880.597	136.311
135	negative	L-Threonate	0.9775	NA	NA	MS2 forward	135.031	339.26
3413	negative	NA	NA	Neocasomorphin (1-5);Irinotecan carboxylate;CPT-11 carboxylate form	10.2013884445726;24.3373785953201	MS1 mz matched	602.297	168.195
4899	negative	NA	NA	NA	NA	Unmapped	1026	349.048
269	negative	Vanillic acid	0.8756	NA	NA	MS2 forward	167.035	48.2975
1767	negative	NA	NA	Phytuberin;Nordihydrocapsiate;Gingerol;Myrsinone;Tanacetol A;Phytuberin;Embelin;[6]-Gingerol;(S)-(+)-[6]Gingerol;6-Gingerol	3.02770611859043;3.02770611859043;3.02770611859043;3.02770611859043;3.02770611859043;3.05931917911483;3.05931917911483;3.05931917911483	MS1 mz matched	353.198	27.447
1495	negative	NA	NA	Melanin;Prekimycin	-0.983764098122621;-1.11958564319684	MS1 mz matched	317.064	152.036
3432	negative	NA	NA	NA	NA	Unmapped	606.322	301.016
4079	negative	NA	NA	2,2',3,4,4',5',6-Heptabromodiphenyl ether;	4.15236407918428;	MS1 mz matched	762.502	39.059
5184	negative	NA	NA	NA	NA	Unmapped	1190	349.241
979	negative	NA	NA	7-Hydroxytrichodermol;Blennin D;Ipomeamaronol;Alkhanol;(1alpha,4alpha,5beta,6alpha,11betaH)-1,4-Epoxy-5-hydroxy-10(14)-germacren-12,6-olide;Ipomeamaronolide;Isoleptospermone;1alpha,15-Dihydroxymarasmene;Absindiol;Adhumulinic acid;4'-Dihydroabscisic acid;3,14-Dihydroxy-11,13-dihydrocostunolide;Arabsin;Artemin;(R)-Athanagrandione;Arlatin;3alpha,15-Dihydroxymarasmene;10-Hydroxymyoporone;Humulinic ac…	-10.5548784674634;-10.5548784674634;-10.5548784674634;-10.5548784674634;-10.5548784674634;-10.5548784674634;-10.5548784674634;-10.5548784674634;-10.5548784674634;-10.5548784674634;-10.5548784674634;-10.5548784674634;-10.5548784674634;-10.5548784674634;-10	MS1 mz matched	265.147	27.3245
4729	negative	NA	NA	Lyciumoside VI;Capsianoside VI;	-10.1836700732641;-10.1836700732641;	MS1 mz matched	944	349.062
4189	negative	NA	NA	PE(20:2(11Z,14Z)/20:4(5Z,8Z,11Z,14Z));PE(20:5(5Z,8Z,11Z,14Z,17Z)/20:1(11Z));PE(20:1(11Z)/20:5(5Z,8Z,11Z,14Z,17Z));PE(18:4(6Z,9Z,12Z,15Z)/22:2(13Z,16Z));PE(20:3(5Z,8Z,11Z)/20:3(8Z,11Z,14Z));PC(15:0/22:6(4Z,7Z,10Z,13Z,16Z,19Z));PE(18:1(11Z)/22:5(4Z,7Z,10Z,13Z,16Z));PE(22:5(7Z,10Z,13Z,16Z,19Z)/18:1(11Z));PE(18:0/22:6(4Z,7Z,10Z,13Z,16Z,19Z));PE(22:5(4Z,7Z,10Z,13Z,16Z)/18:1(9Z));PE(18:1(11Z)/22:5(7Z,1…	-14.2725663351763;-14.2725663351763;-14.2725663351763;-14.2725663351763;-14.2725663351763;-14.2725663351763;-14.2725663351763;-14.2725663351763;-14.2725663351763;-14.2725663351763;-14.2725663351763;-14.2725663351763;-14.2725663351763;-14.2725663351763;-14	MS1 mz matched	790.535	138.724
3655	negative	NA	NA	NA	NA	Unmapped	655.214	514.597
5114	negative	NA	NA	NA	NA	Unmapped	1149.01	349.045
3849	negative	NA	NA	DG(22:0/20:0/0:0);DG(18:0/24:0/0:0);DG(20:0/22:0/0:0);DG(18:0/0:0/24:0);DG(20:0/0:0/22:0);DG(24:0/18:0/0:0);	9.58857673371107;9.58857673371107;9.58857673371107;9.58857673371107;9.58857673371107;9.58857673371107;	MS1 mz matched	708.177	33.728
2006	negative	NA	NA	NA	NA	Unmapped	389.288	35.808
1619	negative	NA	NA	(1S,2S,4S,5S)-2,4-Thujanediol 4-O-beta-D-Glucopyranoside;(1S,2S,4R)-1,8-Epoxy-p-menthan-2-ol glucoside;(2E,4E,7R)-2,7-Dimethyl-2,4-octadiene-1,8-diol 8-O-b-D-glucopyranoside;(1R,2S,4R,5S)-2,5-Fenchanediol 2-O-b-D-glucoside;(1R,3S,4S)-1,8-Epoxy-p-menthan-3-ol glucoside;(4R,6S)-p-Menth-1-ene-4,6-diol 4-glucoside;(1R,2R,4S,6R)-2,6-Fenchanediol 2-O-b-D-glucoside;Neomenthol-glucuronide;(S)-p-Menth-1-e…	-7.53589499518281;-7.53589499518281;-7.53589499518281;-7.53589499518281;-7.53589499518281;-7.53589499518281;-7.53589499518281;-7.53589499518281;-7.53589499518281;-7.53589499518281;-7.53589499518281;-7.53589499518281;-7.53589499518281;-7.53589499518281;-7.	MS1 mz matched	331.174	190.681
4314	negative	NA	NA	PG(18:3(6Z,9Z,12Z)/22:4(7Z,10Z,13Z,16Z));PG(18:3(9Z,12Z,15Z)/22:4(7Z,10Z,13Z,16Z));PG(18:1(11Z)/22:6(4Z,7Z,10Z,13Z,16Z,19Z));PG(18:2(9Z,12Z)/22:5(4Z,7Z,10Z,13Z,16Z));PG(18:2(9Z,12Z)/22:5(7Z,10Z,13Z,16Z,19Z));PG(18:1(9Z)/22:6(4Z,7Z,10Z,13Z,16Z,19Z));	24.8169028362244;24.8169028362244;24.8169028362244;24.8169028362244;24.8169028362244;24.8169028362244;	MS1 mz matched	819.546	40.3475
32	negative	(S)-2-aminobutyric acid	0.9943	NA	NA	MS2 reverse	102.058	389.236
4982	negative	NA	NA	NA	NA	Unmapped	1067.5	349.055
2347	negative	NA	NA	Artonin K;Mollicellin A;Mollicellin B;Austrobailign 1;12-Deoxyaklanonic acid	12.4235402785048;12.4235402785048;12.4235402785048;12.3002742961532;12.3002742961532	MS1 mz matched	441.125	50.6885
2785	negative	NA	NA	NA	NA	Unmapped	501.39	104.984
4030	negative	NA	NA	PE(P-18:1(11Z)/20:5(5Z,8Z,11Z,14Z,17Z));PE(20:5(5Z,8Z,11Z,14Z,17Z)/P-18:1(11Z));PE(20:5(5Z,8Z,11Z,14Z,17Z)/P-18:1(9Z));PE(22:6(4Z,7Z,10Z,13Z,16Z,19Z)/P-16:0);PE(O-16:1(1Z)/22:6(4Z,7Z,10Z,13Z,16Z,19Z));PE(P-18:1(9Z)/20:5(5Z,8Z,11Z,14Z,17Z));Spinetoram	-18.5903983908102;-18.5903983908102;-18.5903983908102;-18.5903983908102;-18.5903983908102;-18.5903983908102;19.1219412217123	MS1 mz matched	746.506	138.026
1487	negative	NA	NA	Floribundine;(E)-2-Hydroxy-N-desmethyldoxepin;Dimizene	12.1686020735677;12.1686020735677;21.697459867715	MS1 mz matched	316.114	379.159
3600	negative	NA	NA	Phosphatidylinositol-3,4,5-trisphosphate;	4.77987386154217;	MS1 mz matched	642.974	348.968
4293	negative	NA	NA	PC(20:3(5Z,8Z,11Z)/20:3(5Z,8Z,11Z));PC(18:1(9Z)/22:5(4Z,7Z,10Z,13Z,16Z));PC(20:3(8Z,11Z,14Z)/20:3(5Z,8Z,11Z));PC(18:2(9Z,12Z)/22:4(7Z,10Z,13Z,16Z));PC(20:4(5Z,8Z,11Z,14Z)/20:2(11Z,14Z));PC(22:5(7Z,10Z,13Z,16Z,19Z)/18:1(9Z));PC(18:4(6Z,9Z,12Z,15Z)/22:2(13Z,16Z));PC(18:1(11Z)/22:5(4Z,7Z,10Z,13Z,16Z));PC(20:3(8Z,11Z,14Z)/20:3(8Z,11Z,14Z));PC(22:4(7Z,10Z,13Z,16Z)/18:2(9Z,12Z));PC(22:5(7Z,10Z,13Z,16Z,…	-20.9397037501742;-20.9397037501742;-20.9397037501742;-20.9397037501742;-20.9397037501742;-20.9397037501742;-20.9397037501742;-20.9397037501742;-20.9397037501742;-20.9397037501742;-20.9397037501742;-20.9397037501742;-20.9397037501742;-20.9397037501742;-20	MS1 mz matched	814.552	40.3185
3249	negative	NA	NA	Mangiferin 6'-gallate;	21.0638497510935;	MS1 mz matched	573.447	105.601
4224	negative	NA	NA	PG(18:1(9Z)/20:3(5Z,8Z,11Z));PG(18:0/20:4(5Z,8Z,11Z,14Z));PG(18:1(11Z)/20:3(8Z,11Z,14Z));PG(18:1(9Z)/20:3(8Z,11Z,14Z));PG(18:1(11Z)/20:3(5Z,8Z,11Z));PG(16:0/22:4(7Z,10Z,13Z,16Z));	-0.593582482687235;-0.593582482687235;-0.593582482687235;-0.593582482687235;-0.593582482687235;-0.593582482687235;	MS1 mz matched	797.541	144.606
4069	negative	NA	NA	PE(16:0/20:2(11Z,14Z));PE(18:0/18:2(9Z,12Z));PE(18:2(9Z,12Z)/18:0);PE(18:1(9Z)/18:1(9Z));PE(18:1(9Z)/18:1(11Z));PE(16:1(9Z)/20:1(11Z));PE(18:1(11Z)/18:1(11Z));PE(22:1(13Z)/14:1(9Z));PE(20:2(11Z,14Z)/16:0);PE(18:1(11Z)/18:1(9Z));PC(18:2(9Z,12Z)/15:0);PE(14:1(9Z)/22:1(13Z));PE(14:0/22:2(13Z,16Z));PE(22:2(13Z,16Z)/14:0);PC(15:0/18:2(9Z,12Z));PE(20:1(11Z)/16:1(9Z));	-0.679177424114922;-0.679177424114922;-0.679177424114922;-0.679177424114922;-0.679177424114922;-0.679177424114922;-0.679177424114922;-0.679177424114922;-0.679177424114922;-0.679177424114922;-0.679177424114922;-0.679177424114922;-0.679177424114922;-0.67917	MS1 mz matched	759.559	175.104
4872	negative	NA	NA	NA	NA	Unmapped	1012.78	39.697
1098	negative	Linoleic acid	0.9993	NA	NA	MS2 forward	279.232	39.059
2505	negative	Lanosterol	0.8526	NA	NA	MS2 reverse	463.339	152.716
3551	negative	NA	NA	3'-Sialyllactose;6'-Sialyllactose;	-21.2832478147521;-21.2832478147521;	MS1 mz matched	632.198	423.507
914	negative	2'-O-Methyluridine	0.9182	NA	NA	MS2 forward	257.076	94.201
3846	negative	NA	NA	NA	NA	Unmapped	707.483	176.754
2192	negative	NA	NA	Borax;Cibarian;beta-D-Glucopyranose, 1,6-bis(3-nitropropanoate);Cororian;alpha-D-Glucopyranose, 2,6-bis(3-nitropropanoate)	0.496222310841617;2.61721183182936;2.61721183182936	MS1 mz matched	417.049	154.017
4690	negative	NA	NA	NA	NA	Unmapped	920.594	135.664
3934	negative	NA	NA	Spirolide F;	-0.329071116273001;	MS1 mz matched	726.502	40.985
3185	negative	NA	NA	NA	NA	Unmapped	560.972	349.056
1480	negative	NA	NA	6b-Hydroxy-8a-methoxy-7(11)-eremophilen-12,8-olide;Methyl (3b,11x)-3-Hydroxy-8-oxo-6-eremophilen-12-oate;Prehumulinic acid;3b-Hydroxy-6b-methoxy-7(11)-eremophilen-12,8a-olide;1-(3,4-Dihydroxyphenyl)-5-hydroxy-3-decanone;3,4-Epoxy-6-methylcyclohexylmethyl-3,4-epoxy-6-methylcyclo-hexanecarboxylate	1.9299172050126;1.9299172050126;1.9299172050126;1.9299172050126;1.78464668453042;1.78464668453042	MS1 mz matched	315.134	28.776
3238	negative	NA	NA	Carindone;Glyuranolide;	-3.49219567784677;-3.49219567784677;	MS1 mz matched	571.326	33.81
4557	negative	NA	NA	NA	NA	Unmapped	875.369	33.189
4337	negative	NA	NA	NA	NA	Unmapped	823.553	138.552
5054	negative	NA	NA	(S)-Hydroxyoctadecanoyl-CoA;	-16.205802249225;	MS1 mz matched	1108	349.055
2539	negative	NA	NA	NA	NA	Unmapped	469.025	349.05
2823	negative	NA	NA	LysoPC(17:0);LysoPE(0:0/20:0);LysoPE(20:0/0:0);rbomycin	-10.0903480378459;-10.0903480378459;-10.0903480378459;15.1177426736372	MS1 mz matched	508.336	185.325
4299	negative	NA	NA	PG(18:0/20:3(5Z,8Z,11Z));PG(18:0/20:3(8Z,11Z,14Z));	-0.918485808127463;-0.918485808127463;	MS1 mz matched	816.57	142.803
1244	negative	NA	NA	Anagrelide;Fluorofelbamate	-11.7147230641137;-3.5144457387207	MS1 mz matched	293.032	225.035
66	negative	2-Methyl-3-hydroxybutyric acid	0.705	NA	NA	MS2 forward	117.057	137.059
4381	negative	NA	NA	PC(20:3(5Z,8Z,11Z)/20:3(5Z,8Z,11Z));PC(18:1(9Z)/22:5(4Z,7Z,10Z,13Z,16Z));PC(20:3(8Z,11Z,14Z)/20:3(5Z,8Z,11Z));PC(18:2(9Z,12Z)/22:4(7Z,10Z,13Z,16Z));PC(20:4(5Z,8Z,11Z,14Z)/20:2(11Z,14Z));PC(22:5(7Z,10Z,13Z,16Z,19Z)/18:1(9Z));PC(18:4(6Z,9Z,12Z,15Z)/22:2(13Z,16Z));PC(18:1(11Z)/22:5(4Z,7Z,10Z,13Z,16Z));PC(20:3(8Z,11Z,14Z)/20:3(8Z,11Z,14Z));PC(22:4(7Z,10Z,13Z,16Z)/18:2(9Z,12Z));PC(22:5(7Z,10Z,13Z,16Z,…	-20.9397037501742;-20.9397037501742;-20.9397037501742;-20.9397037501742;-20.9397037501742;-20.9397037501742;-20.9397037501742;-20.9397037501742;-20.9397037501742;-20.9397037501742;-20.9397037501742;-20.9397037501742;-20.9397037501742;-20.9397037501742;-20	MS1 mz matched	832.566	40.3115
2275	negative	NA	NA	Phenethyl rutinoside;Athamantin	17.0812995275489;-18.490736384511	MS1 mz matched	429.191	190.143
2697	negative	NA	NA	NA	NA	Unmapped	490.852	315.041
3292	negative	NA	NA	NA	NA	Unmapped	580.163	29.182
4503	negative	NA	NA	PG(18:0/22:4(7Z,10Z,13Z,16Z));	-11.3546014430425;	MS1 mz matched	861.541	187.859
575	negative	NA	NA	5-Hydroxy-2-benzyl-1,3-dioxane;Ethyl 4-ethoxybenzoate;(R)-3-Hydroxy-5-phenylpentanoic acid;Isobutyl salicylate;4-Methoxybenzyl propanoate;2-Benzyl-5-hydroxymethyl-1,3-dioxolane;[2-(2-Methylphenyl)-1,3-dioxolan-4-yl]methanol;Zingerone;Butylparaben;Ethyl 4-methylphenoxyacetate;2-(3-Methylphenyl)-1,3-dioxan-5-ol;3-Hydroxyphenyl-valeric acid;2-(2-Methylphenyl)-1,3-dioxan-5-ol;2-(4-Methylphenyl)-1,3-d…	24.2444015006172;24.2444015006172;24.2444015006172;24.2444015006172;24.2444015006172;24.2444015006172;24.2444015006172;24.2444015006172;24.2444015006172;24.2444015006172;24.2444015006172;24.2444015006172;24.2444015006172;24.2444015006172;24.2444015006172;24.2444015006172;24.2444015006172;24.2444015006172;24.2444015006172;24.2444015006172;24.215033620181;24.215033620181	MS1 mz matched	215.073	230.829
1007	negative	NA	NA	NA	NA	Unmapped	269.149	193.565
2280	negative	alpha-Tocopherol (Vitamin E)	0.7176	NA	NA	MS2 forward	429.37	32.485
3688	negative	NA	NA	NA	NA	Unmapped	660.209	35.0825
1890	negative	NA	NA	NA	NA	Unmapped	372.272	35.763
5055	negative	NA	NA	NA	NA	Unmapped	1108.51	349.125
4292	negative	NA	NA	PE(22:5(7Z,10Z,13Z,16Z,19Z)/20:3(8Z,11Z,14Z));PE(20:3(5Z,8Z,11Z)/22:5(7Z,10Z,13Z,16Z,19Z));PE(20:3(8Z,11Z,14Z)/22:5(4Z,7Z,10Z,13Z,16Z));PE(22:5(7Z,10Z,13Z,16Z,19Z)/20:3(5Z,8Z,11Z));PE(22:5(4Z,7Z,10Z,13Z,16Z)/20:3(8Z,11Z,14Z));PE(20:4(8Z,11Z,14Z,17Z)/22:4(7Z,10Z,13Z,16Z));PE(20:2(11Z,14Z)/22:6(4Z,7Z,10Z,13Z,16Z,19Z));PE(20:4(5Z,8Z,11Z,14Z)/22:4(7Z,10Z,13Z,16Z));PE(22:6(4Z,7Z,10Z,13Z,16Z,19Z)/20:2(…	7.68858668574454;7.68858668574454;7.68858668574454;7.68858668574454;7.68858668574454;7.68858668574454;7.68858668574454;7.68858668574454;7.68858668574454;7.68858668574454;7.68858668574454;7.68858668574454;7.68858668574454;7.68858668574454;	MS1 mz matched	814.553	142.681
2655	negative	NA	NA	NA	NA	Unmapped	485.359	38.973
4515	negative	NA	NA	NA	NA	Unmapped	864.569	137.676
3611	negative	NA	NA	S-(9-hydroxy-PGA1)-glutathione;S-(11-hydroxy-9-deoxy-delta12-PGD2)-glutathione;Sepiolite	-15.9653455763674;-15.9653455763674;0.60313322676113	MS1 mz matched	644.795	315.497
3435	negative	NA	NA	Pateamine;Pateamine A	5.22228	MS1 mz matched	607.3	27.2465
4059	negative	NA	NA	PC(20:1(11Z)/14:1(9Z));PC(20:2(11Z,14Z)/14:0);PE-NMe(18:1(9Z)/18:1(9Z));PC(18:1(11Z)/16:1(9Z));PE(15:0/22:2(13Z,16Z));PC(16:1(9Z)/18:1(11Z));PC(18:2(9Z,12Z)/16:0);PE(22:2(13Z,16Z)/15:0);PC(18:1(9Z)/16:1(9Z));PC(16:0/18:2(9Z,12Z));PC(16:1(9Z)/18:1(9Z));PC(14:1(9Z)/20:1(11Z));PC(14:0/20:2(11Z,14Z));	-19.2067408621746;-19.2067408621746;-19.2067408621746;-19.2067408621746;-19.2067408621746;-19.2067408621746;-19.2067408621746;-19.2067408621746;-19.2067408621746;-19.2067408621746;-19.2067408621746;-19.2067408621746;-19.2067408621746;	MS1 mz matched	756.548	40.939
4271	negative	NA	NA	PS(18:2(9Z,12Z)/20:3(8Z,11Z,14Z));PS(18:1(9Z)/20:4(5Z,8Z,11Z,14Z));PS(20:3(8Z,11Z,14Z)/18:2(9Z,12Z));PS(20:4(5Z,8Z,11Z,14Z)/18:1(9Z));	-0.741673451675114;-0.741673451675114;-0.741673451675114;-0.741673451675114;	MS1 mz matched	808.52	154.043
2608	negative	NA	NA	Emetine	-20.404	MS1 mz matched	479.28	27.729
1247	negative	5'-O-methylthymidine	0.8434	NA	NA	MS2 reverse	293.053	147.354
3923	negative	NA	NA	PE(P-18:0/18:4(6Z,9Z,12Z,15Z));PE(18:3(9Z,12Z,15Z)/P-18:1(11Z));PE(P-18:1(9Z)/18:3(6Z,9Z,12Z));PE(20:4(8Z,11Z,14Z,17Z)/P-16:0);PE(18:4(6Z,9Z,12Z,15Z)/P-18:0);PE(18:3(6Z,9Z,12Z)/P-18:1(11Z));PE(18:3(9Z,12Z,15Z)/P-18:1(9Z));PE(P-16:0/20:4(8Z,11Z,14Z,17Z));PE(18:3(6Z,9Z,12Z)/P-18:1(9Z));PE(P-18:1(11Z)/18:3(9Z,12Z,15Z));PE(20:4(5Z,8Z,11Z,14Z)/P-16:0);PE(P-16:0/20:4(5Z,8Z,11Z,14Z));PE(P-18:1(11Z)/18:3…	-18.9304988201739;-18.9304988201739;-18.9304988201739;-18.9304988201739;-18.9304988201739;-18.9304988201739;-18.9304988201739;-18.9304988201739;-18.9304988201739;-18.9304988201739;-18.9304988201739;-18.9304988201739;-18.9304988201739;-18.9304988201739;	MS1 mz matched	722.507	139.188
2253	negative	NA	NA	Austalide L;	-17.5760168941519;	MS1 mz matched	427.212	73.043
2745	negative	NA	NA	5,10-Methenyltetrahydrofolic acid;	-0.728103083030377;	MS1 mz matched	495.176	29.171
4624	negative	NA	NA	NA	NA	Unmapped	892.565	137.36
1443	negative	NA	NA	Fruticosonine	1.7619	MS1 mz matched	311.221	158.264
2181	negative	NA	NA	Phenylethyl primeveroside;Calophyllolide	-7.80237325307754;6.24756104835388	MS1 mz matched	415.158	303.123
4477	negative	NA	NA	NA	NA	Unmapped	854.586	137.304
3013	negative	NA	NA	6,8a-Seco-6,8a-deoxy-5-oxoavermectin ''1b'' aglycone	-0.7216	MS1 mz matched	535.305	32.361
3361	negative	NA	NA	NA	NA	Unmapped	593.322	27.2065
789	negative	Phosphorylcholine	0.8862	NA	NA	MS2 forward	242.079	379.122
2095	negative	NA	NA	NA	NA	Unmapped	400.304	35.107
3055	negative	NA	NA	NA	NA	Unmapped	539.427	38.417
1326	negative	D-Lyxose	0.9799	NA	NA	MS2 reverse	299.096	301.644
4415	negative	NA	NA	PG(18:0/20:3(5Z,8Z,11Z));PG(18:0/20:3(8Z,11Z,14Z));	-0.918485808127463;-0.918485808127463;	MS1 mz matched	840.57	138.745
958	negative	NA	NA	NA	NA	Unmapped	263.022	46.8335
3768	negative	NA	NA	NA	NA	Unmapped	685.523	175.175
4488	negative	NA	NA	PS(18:0/20:0);	-17.1924361572112;	MS1 mz matched	857.07	234.965
3749	negative	NA	NA	NA	NA	Unmapped	679.307	193.278
3339	negative	NA	NA	NA	NA	Unmapped	590.241	35.0345
4407	negative	NA	NA	NA	NA	Unmapped	838.554	139.215
4730	negative	NA	NA	NA	NA	Unmapped	944.503	349.125
5116	negative	NA	NA	Cyclolinopeptide G;	11.0878479919342;	MS1 mz matched	1149.51	349.052
1227	negative	NA	NA	NA	NA	Unmapped	291.005	349
295	negative	L-Arginine	0.9989	NA	NA	MS2 reverse	173.105	501.365
1274	negative	Acadesine (Drug)	0.9991	NA	NA	MS2 reverse	295.05	147.369
3218	negative	NA	NA	NA	NA	Unmapped	566.152	445.351
1891	negative	NA	NA	NA	NA	Unmapped	373.007	349.019
4088	negative	NA	NA	NA	NA	Unmapped	763.547	172.859
1988	negative	NA	NA	NA	NA	Unmapped	387.05	284.106
560	negative	NA	NA	NA	NA	Unmapped	214.065	367.152
2470	negative	LPA(18:1(9Z)/0:0)	0.9767	NA	NA	MS2 forward	457.232	240.506
2689	negative	NA	NA	L-2-Aminoadipate adenylate;Barringtogenol C;Meliantriol;Alisol A	2.44717267940323;-5.71002300727184;-5.71002300727184;-5.71002300727184	MS1 mz matched	489.354	106.258
325	negative	D-Fructose	0.9771	NA	NA	MS2 forward	179.054	189.658
3242	negative	NA	NA	NA	NA	Unmapped	572.238	194.198
2935	negative	NA	NA	NA	NA	Unmapped	523.207	28.435
119	negative	L-Asparagine	0.6765	NA	NA	MS2 forward	131.047	371.007
1367	negative	NA	NA	Cepharadione A;Atherospermidine	0.435967219868841;0.461535234009323	MS1 mz matched	304.069	292.026
65	negative	Succinate	0.9933	NA	NA	MS2 forward	117.021	379.501
3401	negative	NA	NA	DG(18:2(9Z,12Z)/18:1(11Z)/0:0);DG(18:0/0:0/18:3n3);DG(20:3(8Z,11Z,14Z)/16:0/0:0);DG(20:2(11Z,14Z)/16:1(9Z)/0:0);DG(16:0/20:3(5Z,8Z,11Z)/0:0);DG(18:1(11Z)/18:2(9Z,12Z)/0:0);DG(18:1(9Z)/18:2(9Z,12Z)/0:0);DG(18:3(9Z,12Z,15Z)/18:0/0:0);DG(16:0/0:0/20:3n9);DG(16:0/20:3(8Z,11Z,14Z)/0:0);DG(18:3(6Z,9Z,12Z)/18:0/0:0);DG(14:1n5/0:0/22:2n6);DG(18:2(9Z,12Z)/18:1(9Z)/0:0);DG(16:1(9Z)/20:2(11Z,14Z)/0:0);DG(18…	-10.2266316675738;-10.2266316675738;-10.2266316675738;-10.2266316675738;-10.2266316675738;-10.2266316675738;-10.2266316675738;-10.2266316675738;-10.2266316675738;-10.2266316675738;-10.2266316675738;-10.2266316675738;-10.2266316675738;-10.2266316675738;-10	MS1 mz matched	599.495	35.071
142	negative	Salicylic acid	0.8665	NA	NA	MS2 forward	137.025	44.8235
2853	negative	NA	NA	Pumiloside	-17.8461	MS1 mz matched	511.17	29.397
1573	negative	NA	NA	(9R,10S,12Z)-9,10-Dihydroxy-8-oxo-12-octadecenoic acid;Corchorifatty acid F;Auxin a;2,3-Dinor-8-iso prostaglandin F1alpha;2,3-Dinor-8-iso PGF1alpha	17.3953856364666;17.3953856364666;17.3953856364666;17.3164749789419	MS1 mz matched	327.231	39.0495
5098	negative	NA	NA	NA	NA	Unmapped	1134.99	349.026
4245	negative	NA	NA	NA	NA	Unmapped	801.568	142.775
2239	negative	NA	NA	Rothindin;Betavulgarin xyloside;Formononetin 7-O-glucuronide;Dammarenediol-I;Arabidiol;(13R,14R,17E)-Malabarica-17,21-diene-3beta,14-diol;Dammarenediol II;(20S)-Dammar-24-ene-3beta,20-diol;Dammar-24-ene-3beta,20-diol;Lupan-3beta,20-diol;3beta,20-Dihydroxylupane;Monogynol A	-0.450056954722559;-0.450056954722559;-0.450056954722559;-19.5771030703716;-19.5771030703716;-19.5771030703716;-19.5771030703716	MS1 mz matched	425.36	102.954
2517	negative	Cholesterol sulfate	0.9881	NA	NA	MS2 forward	465.301	27.343
2029	negative	NA	NA	NA	NA	Unmapped	392.877	315.251
3719	negative	PA(16:0/18:2(9Z,12Z))	0.9689	NA	NA	MS2 forward	671.46	40.996
3980	negative	NA	NA	NA	NA	Unmapped	738.502	142.339
3725	negative	NA	NA	NA	NA	Unmapped	673.021	349.071
3309	negative	Bilirubin	0.9997	NA	NA	MS2 forward	583.251	53.194
3122	negative	NA	NA	NA	NA	Unmapped	551.027	349.072
3976	negative	NA	NA	Norbadione A;	22.9916092416091;	MS1 mz matched	737.532	160.518
2404	negative	NA	NA	Melleolide L;	-21.1729774456217;	MS1 mz matched	449.127	34.4545
4504	negative	NA	NA	NA	NA	Unmapped	861.996	349.077
4768	negative	NA	NA	NA	NA	Unmapped	964.513	349.651
4958	negative	NA	NA	NA	NA	Unmapped	1053.65	178.016
2119	negative	NA	NA	Cephaloglycin;Cefaloglycin;Cephaloglycin anhydrous	4.32066736724049;4.21205160713226	MS1 mz matched	404.101	392.736
4078	negative	NA	NA	PE(20:3(5Z,8Z,11Z)/18:3(6Z,9Z,12Z));PE(20:3(8Z,11Z,14Z)/18:3(6Z,9Z,12Z));PE(22:5(7Z,10Z,13Z,16Z,19Z)/16:1(9Z));PE(22:6(4Z,7Z,10Z,13Z,16Z,19Z)/16:0);PE(20:5(5Z,8Z,11Z,14Z,17Z)/18:1(11Z));PE(16:1(9Z)/22:5(4Z,7Z,10Z,13Z,16Z));PE(20:5(5Z,8Z,11Z,14Z,17Z)/18:1(9Z));PE(18:1(11Z)/20:5(5Z,8Z,11Z,14Z,17Z));PE(20:4(5Z,8Z,11Z,14Z)/18:2(9Z,12Z));PE(18:1(9Z)/20:5(5Z,8Z,11Z,14Z,17Z));PE(18:3(6Z,9Z,12Z)/20:3(5Z,…	-17.229388380847;-17.229388380847;-17.229388380847;-17.229388380847;-17.229388380847;-17.229388380847;-17.229388380847;-17.229388380847;-17.229388380847;-17.229388380847;-17.229388380847;-17.229388380847;-17.229388380847;-17.229388380847;-17.229388380847;	MS1 mz matched	762.502	141.471
2054	negative	NA	NA	NA	NA	Unmapped	396.003	290.754
206	negative	L-Homocysteine	0.8625	NA	NA	MS2 reverse	156.013	177.242
4097	negative	NA	NA	Saquivir mesylate;Saquivir mesilate	-1.82679	MS1 mz matched	765.365	29.823
4183	negative	NA	NA	NA	NA	Unmapped	788.752	315.602
3374	negative	NA	NA	Pipercyclobutanamide B;Dipiperamide D;Berbamunine;(1S)-1,2,3,4-Tetrahydro-1-[[4-[2-hydroxy-5-[[(1R)-1,2,3,4-tetrahydro-7-hydroxy-6-methoxy-2-methyl-1-isoquinolinyl]methyl]phenoxy]phenyl]methyl]-6-methoxy-2-methyl-7-isoquinolinol;Guattegaumerine;N,N'-Dimethyllindoldhamine;Magnoline	-8.60522854479741;-8.60522854479741;-8.5431785884058;-8.5431785884058;-8.5431785884058	MS1 mz matched	595.284	238.778
2456	negative	NA	NA	NA	NA	Unmapped	455.009	349.027
2087	negative	N-Acetyllactosamine	0.7819	NA	NA	MS2 reverse	399.163	107.411
2532	negative	NA	NA	NA	NA	Unmapped	467.531	349.074
2799	negative	NA	NA	Sodium glycocholate;3a,7b,12a-Trihydroxyoxocholanyl-Glycine;Glycocholic acid;Glycocholate;Glycocholic acid;3alpha,7alpha,12alpha-Trihydroxy-5beta-cholan-24-oylglycine	-17.2747557899232;-17.2747557899232;-17.2747557899232;-17.1928761318569	MS1 mz matched	505.331	27.406
2854	negative	NA	NA	Physalin M;Raucaffricine;Vomilenine beta-D-glucoside	18.4049487256414;-3.59282091794928	MS1 mz matched	511.214	190.415
598	negative	Pantothenate	0.9865	NA	NA	MS2 forward	218.103	269.438
3346	negative	NA	NA	iso-A2E(9,13-di-cis);iso-A2E(11-cis);iso-A2E(13-cis);N-Retinylidene-N-retinylethanolamine;iso-A2E(9-cis);	10.1204850590995;10.1204850590995;10.1204850590995;10.1204850590995;10.1204850590995;	MS1 mz matched	591.458	105.6
3446	negative	NA	NA	Quercetin 7-(rhamnosylglucoside);Meloside L;Multinoside A;Kaempferol 7-sophoroside;Isorhamnetin 3-O-[b-D-xylopyranosyl-(1-&gt;6)-b-D-glucopyranoside];Panasenoside;Quercetin 8-C-(2''-rhamnosylglucoside);Luteolin 6-C-glucoside 8-C-arabinoside;Paeonoside;Rheinoside A;Quercetin 7-rutinoside;Quercetin 3-(2-glucosylrhamnoside);Allivicin;Isoquercitrin 4''-rhamnoside;Calendoflavobioside;Quercetin 3-galac…	-21.9613688388874;-21.9613688388874;-21.9613688388874;-21.9613688388874;-21.9613688388874;-21.9613688388874;-21.9613688388874;-21.9613688388874;-21.9613688388874;-21.9613688388874;-21.9613688388874;-21.9613688388874;-21.9613688388874;-21.9613688388874;-21	MS1 mz matched	609.504	38.364
3561	negative	NA	NA	Madlongiside C;	-20.9031496961955;	MS1 mz matched	635.374	188.505
4507	negative	NA	NA	Mycobactin S	18.8519	MS1 mz matched	862.498	349.109
3547	negative	NA	NA	NA	NA	Unmapped	630.868	44.149
4501	negative	NA	NA	NA	NA	Unmapped	861.317	33.7835
1860	negative	NA	NA	4R,5R,6S-Trihydroxy-2-hydroxymethyl-2-cyclohexen-1-one 6-(2-hydroxy-6-methylbenzoate);Mecarbinzid	7.78052870798791;-7.46524684160365	MS1 mz matched	367.103	301.466
3404	negative	NA	NA	Taurochenodeoxycholate-7-sulfate;Taurochenodeoxycholate-3-sulfate;	-7.89533325307337;-7.89533325307337;	MS1 mz matched	600.222	191.091
385	negative	Kynurenic acid	0.9999	NA	NA	MS2 reverse	188.035	188.887
3797	negative	NA	NA	PC(14:0/15:0);PE(14:0/18:0);PC(15:0/14:0);PE(16:0/16:0);3-Sn-phosphatidylethanolamine;PE(18:0/14:0);	-20.6939773681821;-20.6939773681821;-20.6939773681821;-20.6939773681821;-20.6939773681821;-20.6939773681821;	MS1 mz matched	690.501	146.661
4865	negative	NA	NA	TG(24:0/20:1(11Z)/20:2n6);TG(20:0/24:1(15Z)/18:2(9Z,12Z));TG(24:0/18:2(9Z,12Z)/20:1(11Z));TG(20:0/18:2(9Z,12Z)/24:1(15Z));TG(22:1(13Z)/22:0/20:2n6);TG(20:0/20:2n6/24:1(15Z));TG(22:0/22:1(13Z)/20:2n6);TG(22:1(13Z)/22:0/18:2(9Z,12Z));TG(24:1(15Z)/20:0/20:2n6);TG(22:0/18:2(9Z,12Z)/22:1(13Z));TG(20:0/24:1(15Z)/20:2n6);TG(20:1(11Z)/24:0/20:2n6);TG(24:0/20:1(11Z)/18:2(9Z,12Z));TG(24:0/20:2n6/20:1(11Z))…	-0.823389968602688;-0.823389968602688;-0.823389968602688;-0.823389968602688;-0.823389968602688;-0.823389968602688;-0.823389968602688;-0.823389968602688;-0.823389968602688;-0.823389968602688;-0.823389968602688;-0.823389968602688;-0.823389968602688;-0.82338	MS1 mz matched	1010.67	39.7165
4361	negative	NA	NA	Digitoxigenin 3-[glucosyl-(1-&gt;6)-glucosyl-(1-&gt;4)-2,6-dideoxyribohexoside];	-20.8134974817458;	MS1 mz matched	827.397	367.776
2101	negative	Cellobiose	0.8253	NA	NA	MS2 forward	401.127	393.55
2274	negative	NA	NA	Phenethyl rutinoside;Athamantin	17.4941462221488;-18.0779043754578	MS1 mz matched	429.191	35.189
4157	negative	NA	NA	NA	NA	Unmapped	781.358	33.7605
4192	negative	NA	NA	NA	NA	Unmapped	791.578	171.213
3330	negative	NA	NA	NA	NA	Unmapped	588.828	314.863
3877	negative	NA	NA	Scleroglucan;	17.2138309072542;	MS1 mz matched	713.554	173.152
4003	negative	NA	NA	PE(16:0/20:2(11Z,14Z));PE(18:0/18:2(9Z,12Z));PE(18:2(9Z,12Z)/18:0);PE(18:1(9Z)/18:1(9Z));PE(18:1(9Z)/18:1(11Z));PE(16:1(9Z)/20:1(11Z));PE(18:1(11Z)/18:1(11Z));PE(22:1(13Z)/14:1(9Z));PE(20:2(11Z,14Z)/16:0);PE(18:1(11Z)/18:1(9Z));PC(18:2(9Z,12Z)/15:0);PE(14:1(9Z)/22:1(13Z));PE(14:0/22:2(13Z,16Z));PE(22:2(13Z,16Z)/14:0);PC(15:0/18:2(9Z,12Z));PE(20:1(11Z)/16:1(9Z));	-17.2349677039313;-17.2349677039313;-17.2349677039313;-17.2349677039313;-17.2349677039313;-17.2349677039313;-17.2349677039313;-17.2349677039313;-17.2349677039313;-17.2349677039313;-17.2349677039313;-17.2349677039313;-17.2349677039313;-17.2349677039313;-17	MS1 mz matched	742.534	40.3045
2350	negative	NA	NA	dehydrofelodipine;Sarcostin	-5.23234215334307;1.30809409379342	MS1 mz matched	441.249	28.5435
4460	negative	NA	NA	alpha-Chaconine;Chivosazole B	-22.994396452588;1.79240430221372	MS1 mz matched	850.484	147.937
2068	negative	NA	NA	N-Feruloylglycyl-L-phenylalanine;S-Adenosyl-L-methionine;S-Adenosylmethionine;AdoMet;SAM	-1.62552705817637;24.9642585521256	MS1 mz matched	397.147	206.681
3419	negative	NA	NA	Ginsenoside Rh3;Hebevinoside IV;	-21.9795608023132;-21.9795608023132;	MS1 mz matched	603.844	46.915
4814	negative	NA	NA	TG(20:1(11Z)/24:0/o-18:0);TG(22:0/22:1(13Z)/o-18:0);TG(24:1(15Z)/20:0/o-18:0);TG(22:1(13Z)/22:0/o-18:0);TG(24:0/o-18:0/20:1(11Z));TG(22:0/o-18:0/22:1(13Z));TG(24:0/20:1(11Z)/o-18:0);TG(20:0/o-18:0/24:1(15Z));TG(20:0/24:1(15Z)/o-18:0);	-15.5734641810224;-15.5734641810224;-15.5734641810224;-15.5734641810224;-15.5734641810224;-15.5734641810224;-15.5734641810224;-15.5734641810224;-15.5734641810224;	MS1 mz matched	986.678	39.7105
500	negative	Indolelactic acid	0.9672	NA	NA	MS2 forward	204.066	164.577
765	negative	NA	NA	NA	NA	Unmapped	240.043	172.61
1706	negative	NA	NA	NA	NA	Unmapped	345.013	349.632
1270	negative	NA	NA	NA	NA	Unmapped	294.901	315.18
2742	negative	NA	NA	C.I. Food Red 1;	-20.3933175772267;	MS1 mz matched	495.036	235.511
2552	negative	NA	NA	Lucidenic acid K;	-19.0161441957113;	MS1 mz matched	471.237	190.274
3606	negative	NA	NA	NA	NA	Unmapped	643.452	48.791
611	negative	NA	NA	NA	NA	Unmapped	221.012	225.255
1295	negative	NA	NA	NA	NA	Unmapped	296.133	296.215
2306	negative	NA	NA	Simulansamide;Aureothin	-11.4250812257984;-11.3306601367244	MS1 mz matched	434.106	67.064
1429	negative	NA	NA	NA	NA	Unmapped	310.932	315.026
1686	negative	Isomaltose	0.7668	NA	NA	MS2 forward	341.106	393.405
4154	negative	NA	NA	NA	NA	Unmapped	780.496	349.095
34	negative	NA	NA	NA	NA	Unmapped	103.042	230.15
337	negative	Hydroxyphenyllactic acid	0.9916	NA	NA	MS2 forward	181.051	191.286
3555	negative	NA	NA	N-desethylamiodarone;	12.3494231709277;	MS1 mz matched	633.029	349.072
1974	negative	NA	NA	Porson;Gingerenone B;Isogingerenone B;Burseran;(+)-Burseran;(+)-Eudesmin;Pinoresinol dimethyl ether	0.158996122864972;0.158996122864972;0.158996122864972;0.258951366019982;0.258951366019982	MS1 mz matched	385.166	50.075
4394	negative	NA	NA	NA	NA	Unmapped	835.59	136.577
3684	negative	NA	NA	Norbadione A;	22.9916092416091;	MS1 mz matched	659.508	161.896
4640	negative	NA	NA	NA	NA	Unmapped	896.579	181.412
1591	negative	NA	NA	(卤)-Fenarimol;Ferimol;Triarimol	-14.3025235133784;-14.398270231931;-14.398270231931	MS1 mz matched	329.028	437.548
4559	negative	NA	NA	NA	NA	Unmapped	875.585	135.816
3364	negative	NA	NA	3,5-Digalloylepicatechin;	7.40146878789237;	MS1 mz matched	593.473	108.998
2986	negative	NA	NA	NA	NA	Unmapped	530.298	177.075
4608	negative	NA	NA	TG(15:0/o-18:0/22:1(13Z));TG(22:1(13Z)/15:0/o-18:0);TG(15:0/22:1(13Z)/o-18:0);	-8.28155464560103;-8.28155464560103;-8.28155464560103;	MS1 mz matched	888.5	57.236
3779	negative	NA	NA	NA	NA	Unmapped	687.539	161.085
3660	negative	NA	NA	2'''-N-Acetyl-6'''-deamino-6'''-hydroxyneomycin C	9.28029	MS1 mz matched	656.304	274.187
277	negative	3-Hydroxycapric acid	0.9995	NA	NA	MS2 reverse	169.123	54.21
3092	negative	NA	NA	DG(15:0/14:1(9Z)/0:0);DG(15:0/0:0/14:1n5);DG(14:1(9Z)/15:0/0:0);	-15.3972566092248;-15.3972566092248;-15.3972566092248;	MS1 mz matched	545.416	109.1
3558	negative	NA	NA	NA	NA	Unmapped	634.054	234.742
3341	negative	NA	NA	NA	NA	Unmapped	591.019	349.051
1148	negative	NA	NA	Xanthosine;Xanthosine	4.02392765032754;3.96795642866229	MS1 mz matched	283.077	254.046
957	negative	NA	NA	NA	NA	Unmapped	263.011	349.693
2646	negative	NA	NA	Chenodeoxyglycocholic acid;Deoxycholic acid glycine conjugate;Chenodeoxycholic acid glycine conjugate;Glycoursodeoxycholic acid;Glycodeoxycholate;Glycodeoxycholic acid;3alpha,12alpha-Dihydroxy-5beta-cholan-24-oylglycine;Glycochenodeoxycholate;Glycochenodeoxycholic acid;Chenodeoxyglycocholate	-9.17732113086249;-9.17732113086249;-9.17732113086249;-9.17732113086249;-9.12501966885526;-9.12501966885526	MS1 mz matched	484.279	200.745
2511	negative	Glycocholic acid	0.9964	NA	NA	MS2 forward	464.298	243.713
662	negative	NA	NA	Selenocysteine;5-Nitro-ortho-anisidine;2-Methoxy-5-nitroaniline	5.95060993737788;-14.8762150150169	MS1 mz matched	227.064	365.625
878	negative	NA	NA	NA	NA	Unmapped	254.893	420.895
1663	negative	Erucic acid	0.9883	NA	NA	MS2 forward	337.308	39.061
2802	negative	NA	NA	Phosphoadenosine phosphosulfate;Epothilone B;Patupilone	-6.51297943482301;-9.46999155272848	MS1 mz matched	506.261	200.749
3389	negative	NA	NA	NA	NA	Unmapped	597.35	174.24
2276	negative	NA	NA	Lorcainide;Calanolide A;3,17beta-Diacetoxyestra-1,3,5(10)-trien-6-one;3,17beta-Dihydroxyestra-1,3,5(10)-trien-6-one diacetate;6-Oxo-17beta-estradiol diacetate;6-Lilyl-2-O,3-dimethylflaviolin;7-O-Geranyl-2-O,3-dimethylflaviolin	-0.516503821811378;8.10420932628601;8.10420932628601;8.10420932628601;8.10420932628601	MS1 mz matched	429.192	51.0145
3363	negative	NA	NA	3,5-Digalloylepicatechin;	-6.43389495896258;	MS1 mz matched	593.473	152.025
868	negative	cis-9-Palmitoleic acid	1	NA	NA	MS2 forward	253.216	39.061
3913	negative	NA	NA	Fumonisin B1;Isofumonisin B1;Fumonisin B1	0.0223180721488129;0.0223180721488129;-0.018991153958968	MS1 mz matched	720.389	155.958
3151	negative	alpha-Linolenic acid	0.9997	NA	NA	MS2 reverse	555.437	105.743
2826	negative	NA	NA	Pyriprole	19.4728	MS1 mz matched	509.017	349.055
3512	negative	NA	NA	NA	NA	Unmapped	623.295	27.777
2248	negative	NA	NA	NA	NA	Unmapped	427.015	349.195
574	negative	NA	NA	4,4'-Thiodianiline;4,4'-Thiobisbenzemine	3.03973	MS1 mz matched	215.073	193.525
3037	negative	NA	NA	NA	NA	Unmapped	537.411	124.111
355	negative	NA	NA	(-)-1-Methylpropyl 1-propenyl disulfide;Lichenin;Lichen;(R)-3,3-Dimethylmalate;3-Ethylmalate;2-Hydroxyadipate;2-Hydroxyadipic acid;(R)-2-Ethylmalate;L-Rhamnono-1,4-lactone;L-Rhamno-1,4-lactone;(2R,3S)-2,3-Dimethylmalate;3-Hydroxy-3-methylglutarate;3-Hydorxy-3-methylglutaric acid;beta-Hydroxy-beta-methylglutaric acid;Dicrotalic acid;3-Hydroxy-3-methylpentanedioic acid;Meglutol;2-Dehydro-3-deoxy-L-…	1.90183880776179;7.40499392797541;7.40499392797541;7.40499392797541;7.40499392797541;7.40499392797541;7.40499392797541;7.40499392797541;7.40499392797541;7.40499392797541;7.40499392797541;7.40499392797541;7.40499392797541;7.40499392797541;7.40499392797541;7.40499392797541;7.40499392797541;7.40499392797541;7.40499392797541;7.40499392797541;7.40499392797541	MS1 mz matched	183.03	107.864
5121	negative	NA	NA	Ganglioside GM3 (d18:1/16:0);	-19.2762612674724;	MS1 mz matched	1151.69	249.287
2567	negative	NA	NA	NA	NA	Unmapped	473.278	27.3005
2528	negative	NA	NA	NA	NA	Unmapped	467.37	104.697
892	negative	Palmitic acid	0.9997	NA	NA	MS2 forward	255.232	39.058
3255	negative	NA	NA	NA	NA	Unmapped	574.988	349.079
3029	negative	NA	NA	NA	NA	Unmapped	537.011	349.027
3824	negative	NA	NA	PE(P-18:1(9Z)/16:1(9Z));PE(P-16:0/18:2(9Z,12Z));PE(18:2(9Z,12Z)/P-16:0);PE(16:1(9Z)/P-18:1(11Z));PE(P-18:1(11Z)/16:1(9Z));PE(16:1(9Z)/P-18:1(9Z));	-20.428571122532;-20.428571122532;-20.428571122532;-20.428571122532;-20.428571122532;-20.428571122532;	MS1 mz matched	698.494	349.058
1232	negative	NA	NA	norsertraline;12-OPDA;(15Z)-12-Oxophyto-10,15-dienoate;(15Z)-12-Oxophyto-10,15-dienoic acid;9(S),13(S)-12-Oxo-PDA;12-Oxo-10,15(Z)-phytodienoic acid;(9Z,15Z)-(13S)-12,13-Epoxyoctadeca-9,11,15-trienoic acid;(9Z,15Z)-(13S)-12,13-Epoxyoctadeca-9,11,15-trienoate;(9Z)-(13S)-12,13-Epoxyoctadeca-9,11,15-trienoate;12,13(S)-EOT;12,13(S)-EOTrE;alpha-Licanic acid;(9Z,11E,13E)-4-Oxooctadeca-9,11,13-trienoic a…	-17.8382836587853;-20.5760500033696;-20.5760500033696;-20.5760500033696;-20.5760500033696;-20.5760500033696;-20.5760500033696;-20.5760500033696;-20.5760500033696;-20.5760500033696	MS1 mz matched	291.198	32.975
3728	negative	NA	NA	Adenosine thiamine diphosphate;	-14.8249177216932;	MS1 mz matched	673.523	175.951
3683	negative	NA	NA	NA	NA	Unmapped	659.507	176.696
3828	negative	NA	NA	Posaconazole;	10.2363214284407;	MS1 mz matched	699.337	203.144
601	negative	NA	NA	Phosphoramide mustard;Isophosphamide mustard;Phosphoramide mustard;Phosphamide mustard;Isophosphamide mustard	15.8209205795415;15.8209205795415;15.9095609643126;15.9095609643126	MS1 mz matched	218.99	203.631
4038	negative	NA	NA	NA	NA	Unmapped	747.558	41.661
3110	negative	NA	NA	Desglucocheirotoxin;Manumycin A;Manumycin	-17.2134875172451;0.773077986061721	MS1 mz matched	549.268	349.191
862	negative	NA	NA	NA	NA	Unmapped	252.914	421.116
4749	negative	NA	NA	TG(15:0/22:0/22:2(13Z,16Z));TG(18:0/22:0/20:2n6);TG(18:0/18:2(9Z,12Z)/22:0);TG(15:0/22:2(13Z,16Z)/22:0);TG(18:0/22:0/18:2(9Z,12Z));TG(22:0/18:0/20:2n6);TG(20:0/20:0/20:2n6);TG(15:0/22:1(13Z)/22:1(13Z));TG(22:0/15:0/22:2(13Z,16Z));TG(20:0/20:0/18:2(9Z,12Z));TG(22:0/18:0/18:2(9Z,12Z));TG(16:0/18:2(9Z,12Z)/24:0);TG(18:0/20:2n6/22:0);TG(15:0/20:1(11Z)/24:1(15Z));TG(20:1(11Z)/15:0/24:1(15Z));TG(20:0/2…	20.2371434348529;20.2371434348529;20.2371434348529;20.2371434348529;20.2371434348529;20.2371434348529;20.2371434348529;20.2371434348529;20.2371434348529;20.2371434348529;20.2371434348529;20.2371434348529;20.2371434348529;20.2371434348529;20.2371434348529;20.2371434348529;20.2371434348529;20.2371434348529;20.2371434348529;20.2371434348529;20.2371434348529;20.2371434348529;20.2371434348529;20.23714…	MS1 mz matched	956.6	149.317
569	negative	NA	NA	Bentoquatam;Theophylline;1,3-Dimethylxanthine;Theobromine;3,7-Dimethylxanthine;1,7-Dimethylxanthine;Paraxanthine	22.7700739027407;1.66606780790438;1.66606780790438;1.66606780790438	MS1 mz matched	215.032	299.682
2857	negative	NA	NA	NA	NA	Unmapped	511.298	200.707
3190	negative	NA	NA	Cholesterol glucuronide;Rhodoxanthin	-23.3744753576321;-12.9652294502527	MS1 mz matched	561.374	174.315
3902	negative	NA	NA	NA	NA	Unmapped	718.372	156.049
3493	negative	NA	NA	Lanceotoxin A;Scilliroside;Scillirosidin 3-O-beta-D-glucoside	0.0396592975510196;0.0396592975510196	MS1 mz matched	619.283	236.01
3952	negative	NA	NA	PS(18:2(9Z,12Z)/14:0);PS(16:1(9Z)/16:1(9Z));PS(14:0/18:2(9Z,12Z));PS(14:1(9Z)/18:1(9Z));PS(18:1(9Z)/14:1(9Z));Spinosyn A;Spinosad factor A	-0.788681771115383;-0.788681771115383;-0.788681771115383;-0.788681771115383;-0.788681771115383;16.8937282763903	MS1 mz matched	730.473	40.951
301	negative	NA	NA	NA	NA	Unmapped	174.938	421.118
3813	negative	NA	NA	(2'S)-Deoxymyxol 2'-alpha-L-fucoside	-9.65729	MS1 mz matched	695.458	40.359
3822	negative	NA	NA	NA	NA	Unmapped	697.991	349.099
3072	negative	NA	NA	Physagulin C;	16.5070979667611;	MS1 mz matched	541.26	304.836
3462	negative	NA	NA	Catechin 3',5-diglucoside;Catechin 3',4'-diglucoside;Catechin 3',7-diglucoside;	-23.0728437897319;-23.0728437897319;-23.0728437897319;	MS1 mz matched	613.535	37.713
2943	negative	NA	NA	NA	NA	Unmapped	524.274	179.111
4506	negative	NA	NA	Azaspiracid 3;Mycobactin S	18.1554407503253;-8.942550637888	MS1 mz matched	862.476	57.5265
3302	negative	Biliverdin	0.9832	NA	NA	MS2 forward	581.235	225.993
2360	negative	NA	NA	Difecoum	-3.93181	MS1 mz matched	443.171	47.6685
4396	negative	NA	NA	PS(22:6(4Z,7Z,10Z,13Z,16Z,19Z)/20:4(5Z,8Z,11Z,14Z));PS(20:4(5Z,8Z,11Z,14Z)/22:6(4Z,7Z,10Z,13Z,16Z,19Z));	-11.7288614327563;-11.7288614327563;	MS1 mz matched	836.475	57.93
2409	negative	NA	NA	Myricetin 3-arabinoside;Phylloquinone;Vitamin K1;Phytodione;2-Methyl-3-phytyl-1,4-phthoquinone	21.5259386206156;21.3038842250644	MS1 mz matched	449.359	74.699
1642	negative	NA	NA	4-Hydroxy-5-(dihydroxyphenyl)-valeric acid-O-methyl-O-sulphate;2,2-Bis(4-hydroxyphenyl)hexafluoropropane;Bisphenol AF	10.4067381662863;-10.4148533662267	MS1 mz matched	335.047	323.75
4123	negative	NA	NA	NA	NA	Unmapped	769.616	169.941
782	negative	Pentadecanoic Acid	0.9989	NA	NA	MS2 forward	241.216	39.688
732	negative	NA	NA	NA	NA	Unmapped	236.883	420.884
906	negative	NA	NA	1,3,5-Trihydroxy-10-methylacridone;	-24.1932286170731;	MS1 mz matched	256.235	39.061
110	negative	Hydroxyproline	0.8033	NA	NA	MS2 forward	130.052	340.421
2718	negative	NA	NA	Glyburide;Micozole nitrate	-22.2670261779745;-18.2396934724669	MS1 mz matched	492.986	349.611
1255	negative	NA	NA	Phytuberin;Nordihydrocapsiate;Gingerol;Myrsinone;Tanacetol A;Phytuberin;Embelin;[6]-Gingerol;(S)-(+)-[6]Gingerol;6-Gingerol	3.02770611859043;3.02770611859043;3.02770611859043;3.02770611859043;3.02770611859043;3.05931917911483;3.05931917911483;3.05931917911483	MS1 mz matched	293.177	27.209
2438	negative	LysoPE(16:0/0:0)	0.9711	NA	NA	MS2 forward	452.274	186.795
3144	negative	NA	NA	Aurasperone D;6-O-Demethylnigerone;Dianhydroaurasperone C;Aurasperone D	22.8828529891637;22.8828529891637;22.8828529891637;22.9673664884282	MS1 mz matched	555.15	292.4
2654	negative	NA	NA	Prostaglandin D2-1-glyceryl ester ;Prostaglandin PGE2 1-glyceryl ester;Prostaglandin PGE2 glyceryl ester;	0.578048576724196;0.578048576724196;0.578048576724196;	MS1 mz matched	485.276	29.03
88	negative	NA	NA	Ethylphosphate;	-2.38004003223961;	MS1 mz matched	125.045	368.245
4153	negative	NA	NA	PC(14:1(9Z)/18:2(9Z,12Z));PE(20:3(8Z,11Z,14Z)/15:0);PE(15:0/20:3(5Z,8Z,11Z));PC(18:3(9Z,12Z,15Z)/14:0);PC(14:0/18:3(9Z,12Z,15Z));PC(18:2(9Z,12Z)/14:1(9Z));PC(14:0/18:3(6Z,9Z,12Z));PE(20:3(5Z,8Z,11Z)/15:0);PE(15:0/20:3(8Z,11Z,14Z));PC(18:3(6Z,9Z,12Z)/14:0);	-0.274728595707589;-0.274728595707589;-0.274728595707589;-0.274728595707589;-0.274728595707589;-0.274728595707589;-0.274728595707589;-0.274728595707589;-0.274728595707589;-0.274728595707589;	MS1 mz matched	779.993	349.071
4196	negative	NA	NA	NA	NA	Unmapped	792.525	144.7
4214	negative	NA	NA	(-)-Epigallocatechin 3-gallate 7-glucoside 4"-glucuronide;	-6.15939718541346;	MS1 mz matched	795.631	168.822
211	negative	NA	NA	NA	NA	Unmapped	156.992	315.296
148	negative	3-Hydroxyisovaleric acid	0.774	NA	NA	MS2 reverse	139.041	108.316
3597	negative	NA	NA	NA	NA	Unmapped	642.215	35.594
1341	negative	Eicosapentaenoic acid	0.9673	NA	NA	MS2 reverse	301.215	39.033
3099	negative	NA	NA	2-Decarboxybetanin;Polyoxin B	-20.673296999689;12.028120562789	MS1 mz matched	547.164	301.339
1009	negative	Heptadecanoic acid	0.9914	NA	NA	MS2 forward	269.247	39.062
403	negative	Citrate	0.9868	NA	NA	MS2 forward	191.02	514.71
3285	negative	Naringin	0.7931	NA	NA	MS2 forward	579.163	29.2805
1775	negative	NA	NA	Caffeoyl C1-glucuronide;Caffeic acid 4-O-glucuronide;Caffeic acid 3-O-glucuronide;5-Amino-6-(5'-phospho-D-ribitylamino)uracil;5-Amino-2,6-dioxy-4-(5'-phospho-D-ribitylamino)pyrimidine;5-Amino-6-(5-phospho-D-ribitylamino)uracil	5.01917651913748;5.01917651913748;5.01917651913748;7.95875455976234	MS1 mz matched	355.076	368.148
4232	negative	NA	NA	PG(18:0/20:3(5Z,8Z,11Z));PG(18:0/20:3(8Z,11Z,14Z));	-3.01003026242831;-3.01003026242831;	MS1 mz matched	799.554	40.323
3535	negative	NA	NA	NA	NA	Unmapped	628.763	315.417
2447	negative	NA	NA	Ribostamycin;Vistamycin;Xylostasin;3''-Amino-3''-deoxygentamicin A2;3''-Demethyl-gentamicin A	0.193515363959052;0.193515363959052;0.193515363959052	MS1 mz matched	453.228	53.413
2688	negative	NA	NA	Macrocarpal I;Hemibrevetoxin B	9.63403410341122;9.53959988423918	MS1 mz matched	489.298	24.036
4905	negative	NA	NA	NA	NA	Unmapped	1027.63	188.51
1126	negative	Oleic acid	0.9997	NA	NA	MS2 forward	281.247	39.681
3350	negative	NA	NA	Cyanidin 3-(6''-dioxalylglucoside);	-15.2566811098604;	MS1 mz matched	592.069	284.106
2150	negative	NA	NA	NA	NA	Unmapped	410.983	349.697
103	negative	ketoisocaproic acid	0.8591	NA	NA	MS2 forward	129.057	54.622
3064	negative	NA	NA	1-O-Hexadecyl-lyso-sn-glycero-3-phosphocholine;1-O-Hexadecyl-2-lyso-sn-glycero-3-phosphocholine	7.89441	MS1 mz matched	540.361	193.041
1846	negative	Nervonic acid	0.9796	NA	NA	MS2 forward	365.339	39.0555
1250	negative	O-Acetyl-L-serine	0.8998	NA	NA	MS2 reverse	293.092	366.976
3778	negative	NA	NA	NA	NA	Unmapped	687.539	175.082
1662	negative	NA	NA	Olsalazine;	6.6172797025187;	MS1 mz matched	337.203	27.356
3324	negative	NA	NA	Avermectin B2b aglycone	-16.6541	MS1 mz matched	587.32	33.849
4648	negative	NA	NA	NA	NA	Unmapped	899.592	154.283
2324	negative	NA	NA	NA	NA	Unmapped	436.28	175.674
4339	negative	NA	NA	PG(18:0/22:5(4Z,7Z,10Z,13Z,16Z));PG(18:0/22:5(7Z,10Z,13Z,16Z,19Z));PG(18:1(11Z)/22:4(7Z,10Z,13Z,16Z));PG(18:1(9Z)/22:4(7Z,10Z,13Z,16Z));	-3.78858102329955;-3.78858102329955;-3.78858102329955;-3.78858102329955;	MS1 mz matched	823.554	107.77
2899	negative	NA	NA	NA	NA	Unmapped	516.946	354.786
1156	negative	Stearic acid	0.9997	NA	NA	MS2 forward	283.262	39.051
2403	negative	NA	NA	NA	NA	Unmapped	448.842	315.332
1516	negative	NA	NA	Samandarone	-19.128	MS1 mz matched	319.226	37.717
2395	negative	NA	NA	(-)-Epiafzelechin 3-gallate;	-11.4922876196413;	MS1 mz matched	447.344	78.385
3969	negative	NA	NA	NA	NA	Unmapped	735.515	159.114
3036	negative	NA	NA	NA	NA	Unmapped	537.411	155.375
4992	negative	NA	NA	Melilotin;	-16.2479446024637;	MS1 mz matched	1073.57	190.206
1179	negative	NA	NA	Tenofovir;L-Octanoylcarnitine	2.72028739706291;11.7729310674428	MS1 mz matched	286.213	48.766
2598	negative	NA	NA	LysoPE(0:0/18:1(9Z));LysoPE(18:1(11Z)/0:0);LysoPE(0:0/18:1(11Z));LysoPE(18:1(9Z)/0:0);Delcorine	-24.1253313326121;-24.1253313326121;-24.1253313326121;-24.1253313326121;2.76660206394759	MS1 mz matched	478.29	182.249
1943	negative	NA	NA	1-(alpha-Methyl-4-(2-methylpropyl)benzeneacetate)-beta-D-Glucopyranuronic acid;Cyclocalopin B;Ibuprofen glucuronide;4,8-Diacetyl-T2-tetrol;7alpha,8alpha-Dihydroxycalonectrin;Furathiocarb	-7.24246376980066;-7.24246376980066;-7.24246376980066;-7.24246376980066;-7.24246376980066;9.94357804482162	MS1 mz matched	381.152	167.393
4644	negative	Glycodeoxycholic acid	0.9941	NA	NA	MS2 forward	897.614	200.33
2904	negative	NA	NA	Ganoderiol C;13-beta-D-Glucosyloxydocosanoate	-22.8558366419324;6.51334469814472	MS1 mz matched	517.385	106.059
3135	negative	NA	NA	Pateamine;Pateamine A	-14.5864	MS1 mz matched	554.297	176.43
1359	negative	Arachidonic Acid (peroxide free)	0.9855	NA	NA	MS2 forward	303.231	39.04
686	negative	NA	NA	NA	NA	Unmapped	230.039	376.148
3882	negative	NA	NA	AS 1-5;	-11.7173507037273;	MS1 mz matched	715.032	349.093
2504	negative	NA	NA	Trihydroxycoprostanoic acid;2-Deoxybrassinolide;Castasterone;7-Oxateasterone;(22R,23R,24S)-3beta,22,23-Trihydroxy-7-oxa-5alpha-ergostane-6-one;7-Oxatyphasterol;(22R,23R,24S)-3alpha,22,23-Trihydroxy-7-oxa-5alpha-ergostane-6-one	-6.83665081585729;-6.83665081585729;-6.89135053671247;-6.89135053671247;-6.89135053671247	MS1 mz matched	463.339	105.791
1446	negative	Arachidic acid	0.8368	NA	NA	MS2 forward	311.293	38.388
2612	negative	NA	NA	LysoPE(18:0/0:0);LysoPE(0:0/18:0);LysoPC(15:0);	-7.97686614245629;-7.97686614245629;-7.97686614245629;	MS1 mz matched	480.305	180.147
1750	negative	NA	NA	Coriandrone D;Palmatine;5,6-Dihydro-2,3,9,10-tetramethoxydibenzo[a,g]quinolizinium	24.6120851259578;16.953618989829	MS1 mz matched	351.161	33.773
2252	negative	NA	NA	IDP;Furcatin	-24.1724447255908;17.1654504000142	MS1 mz matched	427.175	185.23
47	negative	Creatinine	0.8381	NA	NA	MS2 forward	112.053	170.358
1065	negative	NA	NA	Fenthion;Fenthion;MPP;4-Methylmercapto-3-methylphenyl dimethyl thiophosphate	9.7043370423577;9.78418818789598	MS1 mz matched	277.023	224.878
3853	negative	NA	NA	NA	NA	Unmapped	709.499	160.766
326	negative	Theophylline	0.9967	NA	NA	MS2 forward	179.057	63.824
2794	negative	NA	NA	Thiamine triphosphate;	21.4061516661788;	MS1 mz matched	504.305	178.812
159	negative	Glyceric acid	0.6167	NA	NA	MS2 forward	142.976	315.162
192	negative	Vanillin	0.7251	NA	NA	MS2 forward	151.04	28.1865
4452	negative	NA	NA	NA	NA	Unmapped	847.633	168.975
3891	negative	NA	NA	PE(18:1(11Z)/16:0);PE(16:0/18:1(11Z));PE(14:0/20:1(11Z));PE(14:1(9Z)/20:0);PC(16:1(9Z)/15:0);PE(20:1(11Z)/14:0);PE(16:0/18:1(9Z));PE(20:0/14:1(9Z));PE(16:1(9Z)/18:0);PC(15:0/16:1(9Z));PE(18:0/16:1(9Z));PE(18:1(9Z)/16:0);1-Hexadecanoyl-2-(9Z-octadecenoyl)-sn-glycero-3-phosphoethanolamine	-16.7853408920491;-16.7853408920491;-16.7853408920491;-16.7853408920491;-16.7853408920491;-16.7853408920491;-16.7853408920491;-16.7853408920491;-16.7853408920491;-16.7853408920491;-16.7853408920491;-16.7853408920491;-16.8481942729235	MS1 mz matched	716.519	145.34
2136	negative	NA	NA	NA	NA	Unmapped	408.908	314.942
3775	negative	NA	NA	NA	NA	Unmapped	686.805	315.199
404	negative	NA	NA	Serinyl-Serine;	-11.6579690879127;	MS1 mz matched	191.072	368.26
5	positive	1-Aminocyclopropanecarboxylic acid	1	NA	NA	MS2 reverse	84.0446	367.181
8	positive	L-Alanine	0.9986	NA	NA	MS2 forward	90.0551	342.391
13	positive	D-alpha-aminobutyric acid	0.9799	NA	NA	MS2 reverse	104.07	298.005
14	positive	Choline	0.6104	NA	NA	MS2 forward	104.107	273.353
23	positive	Creatinine	0.9908	NA	NA	MS2 forward	114.066	171.562
26	positive	D-Proline	0.9995	NA	NA	MS2 forward	116.07	309.145
30	positive	Betaine	0.9999	NA	NA	MS2 forward	118.086	270.632
35	positive	Acetoacetic acid	0.6604	NA	NA	MS2 reverse	120.065	336.786
36	positive	Tyramine	0.9018	NA	NA	MS2 forward	120.08	252.752
41	positive	Nicotinamide	0.9972	NA	NA	MS2 forward	123.054	68.417
44	positive	Taurine	0.8672	NA	NA	MS2 forward	126.021	292.062
50	positive	NA	NA	NA	NA	Unmapped	128.953	352.446
53	positive	Imidazole	0.9983	NA	NA	MS2 reverse	129.065	334.966
66	positive	Creatine	0.9928	NA	NA	MS2 forward	132.076	342.476
68	positive	L-Leucine	0.978	NA	NA	MS2 forward	132.101	259.654
74	positive	2-Phenylglycine	0.6281	NA	NA	MS2 reverse	134.059	28.5475
78	positive	Dopamine	0.7924	NA	NA	MS2 forward	136.075	296.258
80	positive	Hypoxanthine	0.9967	NA	NA	MS2 forward	137.045	171.062
84	positive	Anthranilic acid (Vitamin L1)	0.8918	NA	NA	MS2 reverse	138.054	284.137
95	positive	NA	NA	NA	NA	Unmapped	144.101	270.476
106	positive	Acetylcholine	0.9418	NA	NA	MS2 forward	146.117	372.601
109	positive	L-Glutamine	0.9986	NA	NA	MS2 forward	147.076	366.937
116	positive	L-Glutamate	0.9989	NA	NA	MS2 forward	148.06	389.478
123	positive	L-Methionine	0.97	NA	NA	MS2 forward	150.057	279.979
125	positive	Triethanolamine	0.9016	NA	NA	MS2 forward	150.111	290.36
130	positive	1,3-Benzenediol	0.6039	NA	NA	MS2 forward	152.07	299.492
134	positive	NA	NA	Mesalazine;3-Aminosalicylic acid;3-Hydroxyanthranilic acid;Aminosalicylic Acid;2-Nitro-p-cresol;6-Methoxy-pyridine-3-carboxylic acid;3-Hydroxyanthranilate;3-Hydroxyanthranilic acid;3-Hydroxy-2-methylpyridine-5-carboxylate;4-Aminosalicylate;4-Aminosalicylic acid;(5R)-Carbapen-2-em-3-carboxylate;1-Carbapen-2-em-3-carboxylic acid;(5R)-Carbapenem-3-carboxylic acid;(5R)-Carbapenem-3-carboxylate;(5R)-7…	-11.8855223775591;-11.8855223775591;-11.8855223775591;-11.8855223775591;-11.8855223775591;-11.8855223775591;-11.9306073276198;-11.9306073276198;-11.9306073276198;-11.9306073276198;-11.9306073276198;-11.9306073276198;-11.9306073276198;-11.9306073276198;-11	MS1 mz matched	154.041	235.673
135	positive	NA	NA	Mesalazine;3-Aminosalicylic acid;3-Hydroxyanthranilic acid;Aminosalicylic Acid;2-Nitro-p-cresol;6-Methoxy-pyridine-3-carboxylic acid;3-Hydroxyanthranilate;3-Hydroxyanthranilic acid;3-Hydroxy-2-methylpyridine-5-carboxylate;4-Aminosalicylate;4-Aminosalicylic acid;(5R)-Carbapen-2-em-3-carboxylate;1-Carbapen-2-em-3-carboxylic acid;(5R)-Carbapenem-3-carboxylic acid;(5R)-Carbapenem-3-carboxylate;(5R)-7…	-11.8231542692749;-11.8231542692749;-11.8231542692749;-11.8231542692749;-11.8231542692749;-11.8231542692749;-11.8682392221475;-11.8682392221475;-11.8682392221475;-11.8682392221475;-11.8682392221475;-11.8682392221475;-11.8682392221475;-11.8682392221475;-11	MS1 mz matched	154.041	250.349
156	positive	NA	NA	NA	NA	Unmapped	160.096	291.178
158	positive	Cyclohexylamine	0.6807	NA	NA	MS2 forward	160.132	379.985
166	positive	L-Carnitine	0.9757	NA	NA	MS2 forward	162.111	317.849
176	positive	trans-2-Hydroxycinnamic acid	0.6705	NA	NA	MS2 forward	165.054	296.326
180	positive	L-Phenylalanine	0.9978	NA	NA	MS2 forward	166.085	252.751
181	positive	Ephedrine	0.8476	NA	NA	MS2 forward	166.122	197.608
186	positive	NA	NA	Selenocysteine;5-Nitro-ortho-anisidine;2-Methoxy-5-nitroaniline	5.95060993737788;-14.8762150150169	MS1 mz matched	169.057	366.885
207	positive	L-Arginine	0.9996	NA	NA	MS2 forward	175.118	528.11
208	positive	L-Citrulline	0.9907	NA	NA	MS2 forward	176.102	384.504
215	positive	Indole	0.7742	NA	NA	MS2 reverse	178.085	276.366
222	positive	Methylephedrine	0.8107	NA	NA	MS2 forward	180.137	148.091
224	positive	L-Tyrosine	0.9888	NA	NA	MS2 forward	182.08	296.192
225	positive	Pargyline	0.7581	NA	NA	MS2 forward	182.091	334.796
230	positive	NA	NA	Epinephrine;Ginkgotoxin;Methylnoradrenaline;Levonordefrin;Normetanephrine;L-Adreline;(R)-(-)-Adreline;(R)-(-)-Epinephrine;(R)-(-)-Epiremine;(R)-(-)-Adnephrine;4-[(1R)-1-Hydroxy-2-(methylamino)ethyl]-1,2-benzenediol;L-Normetanephrine;Levonordefrin;alpha-Methylnoradreline;Nordephrine;alpha-Methylnorepinephrine;alpha-Methylnoradreline	20.590649236748;20.590649236748;20.590649236748;20.590649236748;20.590649236748;20.8271504647859;20.8271504647859;20.8271504647859;20.8271504647859	MS1 mz matched	184.093	350.587
236	positive	NA	NA	NA	NA	Unmapped	186.111	333.695
238	positive	NA	NA	NA	NA	Unmapped	186.994	352.443
242	positive	Indolelactic acid	0.7292	NA	NA	MS2 forward	188.07	254.171
251	positive	Trimethylamine N-oxide	0.9857	NA	NA	MS2 reverse	189.101	49.4285
259	positive	5-Hydroxyindoleacetate	0.9749	NA	NA	MS2 reverse	192.064	257.158
267	positive	Nicotinuric acid	0.7953	NA	NA	MS2 forward	198.084	385.35
268	positive	D-Mannose	0.8924	NA	NA	MS2 reverse	198.096	296.409
274	positive	p-CHLOROPHENYLALANINE	0.9685	NA	NA	MS2 forward	200.046	249.975
279	positive	Cysteine-S-sulfate	0.9885	NA	NA	MS2 reverse	201.983	299.167
280	positive	3-Hydroxybenzoate	0.9444	NA	NA	MS2 reverse	202.043	235.666
284	positive	N6-Methyl-L-lysine	0.9943	NA	NA	MS2 reverse	202.154	271.416
290	positive	Leucyl-Alanine	0.7251	NA	NA	MS2 reverse	203.138	338.94
291	positive	NG,NG-dimethyl-L-arginine(ADMA)	0.9731	NA	NA	MS2 forward	203.149	480.974
294	positive	Acetylcarnitine	0.9956	NA	NA	MS2 forward	204.123	302.166
297	positive	NA	NA	NA	NA	Unmapped	205.067	296.791
298	positive	L-Tryptophan	0.9871	NA	NA	MS2 forward	205.096	254.167
311	positive	L-Kynurenine	0.9884	NA	NA	MS2 forward	209.091	257.146
333	positive	NA	NA	NA	NA	Unmapped	216.17	271.556
335	positive	N-a-Acetyl-L-arginine	0.8127	NA	NA	MS2 forward	217.128	363.678
340	positive	NA	NA	Alanyl-Lysine;Lysyl-Alanine;Gamma-glutamyl-L-putrescine;beta-Alanyl-L-lysine;beta-Alanyl-L-lysine;gamma-L-Glutamylputrescine	-22.3206390762476;-22.3206390762476;-22.3206390762476;-22.3206390762476;-22.1295246947196;-22.1295246947196	MS1 mz matched	218.138	277.187
341	positive	Dodecanoic acid	0.6855	NA	NA	MS2 reverse	218.21	92.1955
346	positive	Pantothenate	0.7639	NA	NA	MS2 reverse	220.117	265.137
350	positive	NA	NA	L-beta-aspartyl-L-serine ;Aspartyl-Serine;Serinyl-Aspartate;2-trans,6-trans-Farnesal;trans,trans-Farnesal;Farnesal;(2E,6E)-3,7,11-Trimethyl-2,6,10-dodecatriel;(2E,6E)-Farnesal;alpha-Santalol;beta-Santalol;4-n-Nonylphenol;4-Nonylphenol;p-Nonylphenol;Butylhydroxytoluene;BHT;2,6-Di-t-butyl-4-methylphenol;2,6-Di-tert-butyl-p-cresol;Butylated hydroxytoluene;2,6-Bis(1,1-dimethylethyl)-4-methylphenol;Ca…	23.4722623489918;23.4722623489918;23.4722623489918;11.2094307318271;11.2094307318271;11.2094307318271;11.2094307318271;11.2094307318271;11.2094307318271;11.2094307318271;11.2094307318271;11.2094307318271;11.2094307318271;11.2094307318271;11.2094307318271;11.2094307318271;11.2094307318271;11.2094307318271;11.2094307318271;11.2094307318271;11.2094307318271	MS1 mz matched	221.185	272.132
352	positive	N-Acetyl-D-glucosamine	0.7498	NA	NA	MS2 reverse	222.096	254.362
363	positive	NA	NA	Tetranorbiotin	2.12737	MS1 mz matched	226.987	352.447
367	positive	Histidinyl-Alanine	0.7123	NA	NA	MS2 forward	227.113	339.277
382	positive	NA	NA	(S)-Menthone 8-thioacetate;Mansonone C;3,8-Dimethyl-5-isopropyl-1,2-phthalenedione;Bisphenol A;2,2-Bis(4-Hydroxyphenyl)propane;1,1-Bis(4-hydroxyphenyl)propane;Lindenenone	-3.90593469732585;11.0014002761325;11.0014002761325;11.0014002761325;11.0014002761325	MS1 mz matched	229.118	417.912
385	positive	NA	NA	NA	NA	Unmapped	229.154	298.56
386	positive	NA	NA	NA	NA	Unmapped	229.154	363.906
388	positive	7-Methylxanthine	0.9804	NA	NA	MS2 reverse	230.069	270.503
390	positive	Ergothioneine	0.9437	NA	NA	MS2 forward	230.095	323.454
397	positive	NA	NA	NA	NA	Unmapped	230.247	146.977
409	positive	NA	NA	Benzeneacetamide-4-O-sulphate;Paracetamol sulfate;	-4.94805338040361;-4.94805338040361;	MS1 mz matched	232.026	33.531
412	positive	NA	NA	Gamma-Aminobutyryl-lysine;	-20.7547296089515;	MS1 mz matched	232.154	254.54
435	positive	NA	NA	N-Gluconyl ethanolamine;Dihydrobiopterin;6,7-Dihydrobiopterin;Quinoid-dihydrobiopterin;(6R)-6-(L-erythro-1,2-Dihydroxypropyl)-7,8-dihydro-6H-pterin;7,8-Dihydrobiopterin;L-erythro-7,8-Dihydrobiopterin;6-Lactoyl-5,6,7,8-tetrahydropterin;L-threo-7,8-Dihydrobiopterin	1.25568531052525;-4.17338979468318;-4.17338979468318;-4.17338979468318;-4.17338979468318	MS1 mz matched	240.101	216.358
439	positive	NA	NA	L-Gizzerosine;Dehydrofalcarinone	-20.656600958686;9.43171306936427	MS1 mz matched	241.154	369.45
453	positive	NA	NA	NA	NA	Unmapped	244.01	236.054
460	positive	NA	NA	Hexylcaine;Acrifoline;Inundatine;Bufuralol;Hexylcaine;Piperocaine;Metycaine	23.4365835510452;23.3561751619203;23.3561751619203;23.3561751619203;23.3561751619203;23.3561751619203	MS1 mz matched	244.176	269.842
466	positive	Allocystathionine	0.6028	NA	NA	MS2 forward	245.058	257.13
469	positive	NA	NA	threo-Syringoylglycerol;	13.5676856568559;	MS1 mz matched	245.106	328.219
470	positive	Prolyl-Glutamate	0.9554	NA	NA	MS2 forward	245.112	409.113
482	positive	Nortriptyline	0.644	NA	NA	MS2 reverse	246.169	236.883
487	positive	NA	NA	NA	NA	Unmapped	246.242	82.5265
494	positive	NA	NA	Dibutyl malate;3-Hydroxydodecanedioic acid;2-Deoxystreptidine;N,N'-Bis(aminoiminomethyl)-2-deoxy-streptamine	-14.5822277728205;-14.5822277728205;-3.51650900286446	MS1 mz matched	247.143	197.31
495	positive	Prolyl-Asparagine	0.7077	NA	NA	MS2 forward	247.139	345.051
496	positive	NA	NA	Mepivacaine;Milnacipran;Mepivacaine;5,6-Dehydrolupanine;Multiflorine	-8.99082386066404;-8.99082386066404;-8.93679734437457;-8.93679734437457;-8.93679734437457	MS1 mz matched	247.176	270.421
507	positive	NA	NA	Threoninyl-Gamma-glutamate;Gamma-glutamyl-Threonine;Glutaminyl-Threonine;Threoninyl-Glutamine;Yellow AB;1-(2-Phenyldiazenyl)-2-phthalemine	-20.0826703700179;-20.0826703700179;-20.0826703700179;-20.0826703700179;3.87653619089095	MS1 mz matched	248.112	383.286
508	positive	NA	NA	Threoninyl-Lysine;Lysyl-Threonine;	-19.3481034194568;-19.3481034194568;	MS1 mz matched	248.148	316.759
514	positive	Sulfapyridine	0.7661	NA	NA	MS2 reverse	249.053	33.304
523	positive	NA	NA	2,4-Dichloro-3-oxoadipate	7.89615	MS1 mz matched	250.948	352.413
541	positive	NA	NA	Carboxy-ibuprofen;Ethyl vanillin isobutyrate;3-Dimethylallyl-4-hydroxymandelic acid	-3.63821398521613;-3.63821398521613;-3.81186498023986	MS1 mz matched	254.138	306.783
546	positive	Daidzein	0.7948	NA	NA	MS2 reverse	255.064	25.996
554	positive	NA	NA	Clausine L;Methyl 6-methoxy-9H-carbazole-3-carboxylate;Ketorolac;Mukonine;Pranoprofen;1-Hydroxy-3-methoxy-10-methylacridone;1,6-Dimethoxy-9H-carbazole-3-carboxaldehyde;	-24.0661051691837;-24.0661051691837;-24.0661051691837;-24.0661051691837;-24.0661051691837;-24.0661051691837;-24.0661051691837;	MS1 mz matched	256.262	35.4135
556	positive	NA	NA	NA	NA	Unmapped	256.299	588.548
561	positive	NA	NA	NA	NA	Unmapped	257.147	271.022
565	positive	Glycerophosphocholine	0.9728	NA	NA	MS2 forward	258.109	380.82
568	positive	NA	NA	2-Hexenoylcarnitine;	24.5009603650764;	MS1 mz matched	258.169	225.167
584	positive	NA	NA	Glucosamine-1P;Glucosamine 6-phosphate;Aminofructose 6-phosphate;	-10.1902059879921;-10.1902059879921;-10.1902059879921;	MS1 mz matched	260.148	283.248
585	positive	NA	NA	Lysyl-Leucine;Isoleucyl-Lysine;Lysyl-Isoleucine;Leucyl-Lysine;	-17.7624833459177;-17.7624833459177;-17.7624833459177;-17.7624833459177;	MS1 mz matched	260.185	219.895
599	positive	Lysyl-Proline	0.7173	NA	NA	MS2 reverse	261.188	219.911
604	positive	NA	NA	Aspartyl-Lysine;Aspartylysine;Gamma glutamyl ornithine;Lysyl-Aspartate;Alpha-Aspartyl-lysine;Yellow OB;1-[2-(2-Methylphenyl)diazenyl]-2-phthalemine	-18.2081767550259;-18.2081767550259;-18.2081767550259;-18.2081767550259;-18.2081767550259;4.27361217516888	MS1 mz matched	262.128	392.545
607	positive	NA	NA	Hexylcaine;Acrifoline;Inundatine;Bufuralol;Hexylcaine;Piperocaine;Metycaine	23.4365835510452;23.3561751619203;23.3561751619203;23.3561751619203;23.3561751619203;23.3561751619203	MS1 mz matched	262.186	270.192
614	positive	NA	NA	Thioxanthine monophosphate;Streptidine	-7.62951094838464;-3.81477002671558	MS1 mz matched	263.146	342.587
623	positive	Alpha-N-Phenylacetyl-L-glutamine	0.985	NA	NA	MS2 forward	265.117	215.625
624	positive	trans-Vaccenic acid	0.7718	NA	NA	MS2 forward	265.251	35.104
631	positive	Pseudouridine	0.6194	NA	NA	MS2 reverse	267.058	242.125
637	positive	Adenosine	0.9941	NA	NA	MS2 forward	268.103	172.862
641	positive	NA	NA	NA	NA	Unmapped	268.997	352.379
642	positive	Luteolin	1	NA	NA	MS2 reverse	269.044	26.602
644	positive	Inosine	0.9956	NA	NA	MS2 forward	269.087	217.439
651	positive	NA	NA	Threoninyl-Glutamate;Glutamyl-Threonine;N-(4-Coumaroyl)-L-homoserine lactone	-12.186504124011;-12.186504124011;22.2595913544235	MS1 mz matched	270.088	35.685
659	positive	NA	NA	Estrone;15-Octadecene-9,11,13-triynoic acid;Estrone;3-Hydroxy-1,3,5(10)-estratrien-17-one;Hexestrol;Exestrol;Trenbolone;17-beta-Hydroxyestra-4,9,11-trien-3-one;17beta-Dihydroequilin;Estra-1,3,5(10),6-tetraen-3,17beta-diol;6-Dehydroestradiol;3-Hydroxyestra-1,3,5(10)-trien-16-one	8.74807433985742;8.74807433985742;8.67367388454437;8.67367388454437;8.67367388454437;8.67367388454437;8.67367388454437;8.67367388454437	MS1 mz matched	271.164	195.114
665	positive	NA	NA	NA	NA	Unmapped	272.257	36.956
682	positive	Palmitic acid	0.7693	NA	NA	MS2 reverse	274.273	52.95
693	positive	L-Pyroglutamic acid	0.7008	NA	NA	MS2 forward	276.118	421.079
695	positive	NA	NA	Epsilon-(gamma-Glutamyl)-lysine;L-a-glutamyl-L-Lysine;	-17.135369637683;-17.135369637683;	MS1 mz matched	276.143	393.243
697	positive	NA	NA	NA	NA	Unmapped	276.18	269.593
721	positive	NA	NA	Glycerophosphocholine;Tolmetin;Ismine	-3.20455445608321;-12.446267131312;-12.446267131312	MS1 mz matched	280.092	380.788
722	positive	Propionylglycine	0.8991	NA	NA	MS2 reverse	280.154	231.17
723	positive	NA	NA	2-(5,8-Tetradecadienyl)cyclobutanone;6,10,14-Trimethyl-5,9,13-pentadecatrien-2-one;4-Dodecylphenol	1.27521803941346;1.27521803941346;1.1440351723637	MS1 mz matched	280.262	35.798
728	positive	Phenylethylamine	0.9619	NA	NA	MS2 reverse	281.137	36.312
733	positive	1-Methyladenosine	0.9964	NA	NA	MS2 forward	282.119	285.901
736	positive	NA	NA	Cycloheximide	22.7159	MS1 mz matched	282.169	307.525
737	positive	NA	NA	Oleamide;Dodemorph;Oleamide;Oleyl amide;(Z)-9-Octadecemide	24.2613897848648;24.1358854011599;24.1358854011599	MS1 mz matched	282.279	34.9515
740	positive	NA	NA	threo-Syringoylglycerol;	13.5676856568559;	MS1 mz matched	283.061	327.997
754	positive	Isoleucyl-Asparagine	0.6282	NA	NA	MS2 forward	284.106	380.974
763	positive	Glycitein	0.9147	NA	NA	MS2 forward	285.075	24.162
777	positive	NA	NA	2-Octenoylcarnitine;	23.9090674530195;	MS1 mz matched	286.201	209.175
784	positive	NA	NA	Tenofovir;L-Octanoylcarnitine	-8.00801358454332;1.04453296661477	MS1 mz matched	288.216	199.437
785	positive	Heptadecanoic acid	0.7692	NA	NA	MS2 reverse	288.289	73.946
795	positive	NA	NA	3-Methylglutarylcarnitine;	22.8458863827946;	MS1 mz matched	290.159	388.258
808	positive	N-Acetylneuraminic acid	0.94	NA	NA	MS2 forward	292.102	515.098
811	positive	NA	NA	NA	NA	Unmapped	292.959	352.437
821	positive	NA	NA	Tyrosyl-Hydroxyproline;N-gamma-L-Glutamyl-L-phenylalanine;4'-tert-Butyl-2',6'-dimethyl-3',5'-dinitroacetophenone;Hydroxyprolyl-Tyrosine;Glutamylphenylalanine;L-gamma-Glutamyl-beta-phenyl-beta-L-alanine;Aspartame;Aspartame	-18.9435272218036;-18.9435272218036;-18.9435272218036;-18.9435272218036;-18.9435272218036;-18.9435272218036;-18.9435272218036;-19.0397441058915	MS1 mz matched	295.117	36.199
830	positive	cis-9-Palmitoleic acid	0.7488	NA	NA	MS2 forward	296.258	36.189
842	positive	2-Methylguanosine	0.6472	NA	NA	MS2 forward	298.114	197.841
845	positive	Linoleic acid	0.8711	NA	NA	MS2 forward	298.273	111.232
851	positive	NA	NA	D-4'-Phosphopantothenate;	3.95308428832194;	MS1 mz matched	300.216	197.777
852	positive	Sphingosine	0.9908	NA	NA	MS2 forward	300.289	109.074
868	positive	NA	NA	NA	NA	Unmapped	302.195	281.05
877	positive	Flumequine	0.9967	NA	NA	MS2 reverse	303.111	253.486
881	positive	20-Hydroxyeicosatetraenoic acid	0.7714	NA	NA	MS2 forward	303.231	56.7115
885	positive	NA	NA	Pimelylcarnitine;	21.5767104521489;	MS1 mz matched	304.175	374.368
886	positive	NA	NA	NA	NA	Unmapped	304.211	237.481
895	positive	NA	NA	Guanosine;8-Hydroxy-deoxyguanosine;Guanosine;Isoguanosine;Crotonoside	11.7679196159712;11.7679196159712;11.6570001876575;11.6570001876575	MS1 mz matched	306.08	260.585
897	positive	NA	NA	Dichlorphenamide;Buprofezin	-16.4748165316421;-7.29933895493559	MS1 mz matched	306.154	403.099
905	positive	NA	NA	Naematolone;Matricin;Achillicin;Lupite;Lupinic acid;3-[N6-(4-Hydroxyisopentenyl)adeninyl]-L-alanine;(S)-2-Amino-3-{[(E)-4-hydroxy-3-methylbut-2-enylamino]purin-9-yl}propanoic acid	-11.2784687294296;-11.2784687294296;-11.2784687294296;-2.38144876588509	MS1 mz matched	307.143	254.135
921	positive	NA	NA	Tenofovir;L-Octanoylcarnitine	-8.00801358454332;1.04453296661477	MS1 mz matched	310.201	199.063
923	positive	NA	NA	noroxymorphone;(R,S)-Norlaudanosoline;Pipermethystine;	5.22083251402707;5.22083251402707;5.22083251402707;	MS1 mz matched	310.309	34.627
934	positive	NA	NA	2-trans,4-cis-Decadienoylcarnitine;	20.2209939092277;	MS1 mz matched	312.216	194.3
938	positive	NA	NA	Epithiemycin B;Epithiemycin D	-3.2043271232716;-3.2043271232716	MS1 mz matched	313.085	212.458
944	positive	NA	NA	9-Decenoylcarnitine;	21.2107416600803;	MS1 mz matched	314.232	190.073
946	positive	NA	NA	Laurelliptine;Moupinamide;N-cis-Feruloyltyramine;Muricinine;Laurolitsine;	-22.0220009683388;-22.0220009683388;-22.0220009683388;-22.0220009683388;-22.0220009683388;	MS1 mz matched	314.341	137.843
947	positive	NA	NA	NA	NA	Unmapped	314.787	321.069
956	positive	NA	NA	Alizapride;	16.5956549245576;	MS1 mz matched	316.175	372.024
958	positive	NA	NA	Citpressine II;	-1.28097754805141;	MS1 mz matched	316.32	69.848
962	positive	NA	NA	NA	NA	Unmapped	316.92	352.437
964	positive	NA	NA	Griseofulvin;Griseofulvin	-6.72022842094743;-6.8167990923602	MS1 mz matched	317.048	321.151
974	positive	NA	NA	Terodiline hydrochloride;	-2.02624843102568;	MS1 mz matched	318.19	366.447
980	positive	NA	NA	N-(1-Deoxy-1-fructosyl)histidine;Phytosphingosine;4-D-Hydroxysphinganine	13.3373874990051;20.2711343584337	MS1 mz matched	318.299	78.782
1002	positive	Erucic acid	0.7797	NA	NA	MS2 forward	321.314	34.13
1011	positive	2'-O-methylcytidine	0.9993	NA	NA	MS2 reverse	324.058	344.019
1019	positive	D-Lactose	0.8813	NA	NA	MS2 forward	325.112	394.878
1028	positive	Stearic acid	0.9999	NA	NA	MS2 reverse	326.304	35.716
1030	positive	NA	NA	Sakacin A;Vidarabine;9-beta-D-Arabino furanosyl adenine monohydrate	18.1994047240818;5.96266738863287	MS1 mz matched	327.14	217.394
1036	positive	Histidinyl-Glutamine	0.9841	NA	NA	MS2 reverse	328.102	300.142
1041	positive	NA	NA	Diloxanide;Rhododendrin	5.10687888967234;-10.7395074998515	MS1 mz matched	329.149	34.7635
1049	positive	NA	NA	Sakacin A;	18.1994047240818;	MS1 mz matched	330.227	216.424
1050	positive	NA	NA	NA	NA	Unmapped	330.336	68.378
1051	positive	NA	NA	NA	NA	Unmapped	330.336	41.677
1053	positive	Inosine 5'-monophosphate (IMP)	0.9947	NA	NA	MS2 reverse	331.044	436.363
1054	positive	DL-Phenylalanine	0.9644	NA	NA	MS2 reverse	331.165	254.527
1062	positive	NA	NA	Tridecanoylglycine;	-6.4295914578728;	MS1 mz matched	332.242	217.504
1066	positive	NA	NA	Trichlorot	2.71136	MS1 mz matched	332.951	352.445
1074	positive	NA	NA	NA	NA	Unmapped	334.185	396.388
1094	positive	NA	NA	Pipericine;	18.9766377048335;	MS1 mz matched	336.325	35.5545
1107	positive	Erucamide	0.9803	NA	NA	MS2 forward	338.341	34.0925
1115	positive	NA	NA	3-O-p-Coumaroylquinic acid;Hydrojuglone glucoside;alpha-Hydrojuglone 4-O-b-D-glucoside;	-24.5337624476174;-24.5337624476174;-24.5337624476174;	MS1 mz matched	339.3	34.9595
1125	positive	NA	NA	3-O-(4-O-Methyl-a-D-glucopyranuronosyl)-L-arabinose;3'-Ketolactose;4-O-beta-D-Glucopyranuronosyl-L-fucose;2-O-(4-O-Methyl-a-D-glucopyranuronosyl)-D-xylose;2-O-a-D-Galactopyranuronosyl-L-rhamnose;4-O-(4-O-Methyl-alpha-D-glucopyranuronosyl)-L-arabinose;Cellobiono-1,5-lactone;Cellobiose-1,5-lactone;Cellobionolactone;3-Ketolactose;3-Ketosucrose;3-Dehydro-alpha-D-glucosyl-beta-D-fructofuranoside	9.56915152572004;9.56915152572004;9.56915152572004;9.56915152572004;9.56915152572004;9.56915152572004;9.45594864289074;9.45594864289074;9.45594864289074	MS1 mz matched	341.104	254.464
1128	positive	1-Stearoyl-sn-glycerol	0.7571	NA	NA	MS2 reverse	341.305	35.3275
1134	positive	NA	NA	trans-2-Dodecenoylcarnitine;	19.4394066834618;	MS1 mz matched	342.263	180.434
1136	positive	NA	NA	Tryptophyl-Histidine;Histidinyl-Tryptophan;	22.0880448142439;22.0880448142439;	MS1 mz matched	342.372	136.045
1147	positive	Donepezil	0.909	NA	NA	MS2 reverse	344.206	338.248
1178	positive	NA	NA	NA	NA	Unmapped	350.325	34.373
1179	positive	NA	NA	NA	NA	Unmapped	351.001	352.426
1191	positive	NA	NA	8-Hydroxy-R-acenocoumarol;6-Hydroxy-R-acenocoumarol;7-Hydroxy-R-acenocoumarol;	2.97840735896251;2.97840735896251;2.97840735896251;	MS1 mz matched	352.32	35.2575
1200	positive	NA	NA	Olopatadine n-oxide;Melosatin A	-5.12768421731202;-5.10446557622177	MS1 mz matched	354.161	328.088
1204	positive	Phytanic acid	0.64	NA	NA	MS2 reverse	354.336	34.935
1213	positive	NA	NA	Gomphidic acid;	14.7737269411902;	MS1 mz matched	355.284	35.652
1222	positive	NA	NA	NA	NA	Unmapped	356.351	64.775
1223	positive	NA	NA	NA	NA	Unmapped	356.912	352.452
1229	positive	2'-O-methylguanosine	0.9976	NA	NA	MS2 reverse	358.142	212.458
1230	positive	NA	NA	Leucyl-leucyl-norleucine	-13.0672	MS1 mz matched	358.258	198.174
1233	positive	Behenic acid	0.6081	NA	NA	MS2 reverse	358.366	139.662
1244	positive	NA	NA	1'-hydroxytriazolam;4-hydroxytriazolam;	-22.6524246887784;-22.6524246887784;	MS1 mz matched	360.201	373.502
1246	positive	NA	NA	2-Hydroxylauroylcarnitine;	17.7526824907703;	MS1 mz matched	360.274	205.34
1264	positive	Hydrocortisone (Cortisol)	0.6815	NA	NA	MS2 forward	363.216	50.976
1276	positive	Cellobiose	0.8368	NA	NA	MS2 reverse	365.105	394.18
1277	positive	NA	NA	Maltulose;Isomaltose;Inulobiose;Galactinol;Sucrose;D-Maltose;Epimelibiose;Kojibiose;Glucinol;Trehalose;Sakebiose;Mannobiose;3-b-Galactopyranosyl glucose;Trehalulose;Allolactose;Turanose;beta-Lactose;Galabiose;Cellobiose;Lactulose;DEAE-cellulose;Melibiose;Neotrehalose;Glucose-1,3-mannose oligosaccharide;Fagopyritol A1;Alpha-Lactose;Sucrose;Cane sugar;Saccharose;1-alpha-D-Glucopyranosyl-2-beta-D-fr…	5.22775577378654;5.22775577378654;5.22775577378654;5.22775577378654;5.22775577378654;5.22775577378654;5.22775577378654;5.22775577378654;5.22775577378654;5.22775577378654;5.22775577378654;5.22775577378654;5.22775577378654;5.22775577378654;5.22775577378654;5.22775577378654;5.22775577378654;5.22775577378654;5.22775577378654;5.22775577378654;5.22775577378654;5.22775577378654;5.22775577378654;5.227755…	MS1 mz matched	365.105	361.036
1280	positive	NA	NA	Fludarabine;Benzoylprop-ethyl	-9.71605801099811;-22.9672300795219	MS1 mz matched	366.05	310.803
1283	positive	N-Acetyllactosamine	0.9906	NA	NA	MS2 forward	366.139	515.061
1287	positive	NA	NA	NA	NA	Unmapped	366.372	33.807
1292	positive	NA	NA	Phosphoribosyl formamidocarboxamide;Fumigaclavine C	1.40696480523853;-24.2599528657732	MS1 mz matched	367.222	226.89
1302	positive	NA	NA	3, 5-Tetradecadiencarnitine;	17.186575964957;	MS1 mz matched	368.279	176.419
1307	positive	NA	NA	12alpha-Hydroxyerosone;Decarbamoylgonyautoxin 1	-23.3717549536665;16.3010256062722	MS1 mz matched	369.088	259.758
1318	positive	Lathosterol	0.7641	NA	NA	MS2 reverse	369.35	33.0055
1340	positive	MG(16:0)	0.7518	NA	NA	MS2 reverse	372.31	173.898
1344	positive	NA	NA	(-)-Arctigenin;Hydroxymyricanone;9-Hydroxy-3',4'-dimethoxy-3,4-methylenedioxy-9,9'-epoxylignan;Tetrahydrocurcumin;(8R,8'R,9S)-9-Hydroxy-3,4-dimethoxy-3',4'-methylenoxy-9,9'-epoxylignan;Licoriphenone;6',7'-Dihydroxybergamottin;2-(4-Allyl-2,6-dimethoxyphenoxy)-1-(3,4-methylenedioxyphenyl)-1-propanol;Arctigenin;(-)-Arctigenin;Fargesone A;Kadsurin A	6.07015145691368;6.07015145691368;6.07015145691368;6.07015145691368;6.07015145691368;6.07015145691368;6.07015145691368;6.07015145691368;6.03925035720516;6.03925035720516;6.03925035720516	MS1 mz matched	373.159	299.375
1351	positive	NA	NA	Dodecanedioylcarnitine;Curacin A	16.9977617729145;23.7974526415733	MS1 mz matched	374.253	311.106
1353	positive	NA	NA	Deferasirox;	1.10711306070498;	MS1 mz matched	374.362	70.7885
1355	positive	NA	NA	Halacrite	22.8344	MS1 mz matched	374.962	352.403
1369	positive	NA	NA	NA	NA	Unmapped	376.787	321.079
1389	positive	NA	NA	Donepezil;	-23.4040702982407;	MS1 mz matched	380.206	319.986
1390	positive	Sphingosine 1-phosphate	0.9685	NA	NA	MS2 forward	380.255	277.413
1395	positive	NA	NA	Maltulose;Isomaltose;Inulobiose;Galactinol;Sucrose;D-Maltose;Epimelibiose;Kojibiose;Glucinol;Trehalose;Sakebiose;Mannobiose;3-b-Galactopyranosyl glucose;Trehalulose;Allolactose;Turanose;beta-Lactose;Galabiose;Cellobiose;Lactulose;DEAE-cellulose;Melibiose;Neotrehalose;Glucose-1,3-mannose oligosaccharide;Fagopyritol A1;Alpha-Lactose;Sucrose;Cane sugar;Saccharose;1-alpha-D-Glucopyranosyl-2-beta-D-fr…	-0.618210984820426;-0.618210984820426;-0.618210984820426;-0.618210984820426;-0.618210984820426;-0.618210984820426;-0.618210984820426;-0.618210984820426;-0.618210984820426;-0.618210984820426;-0.618210984820426;-0.618210984820426;-0.618210984820426;-0.61821	MS1 mz matched	381.079	394.216
1404	positive	NA	NA	NA	NA	Unmapped	382.056	343.022
1418	positive	25-hydroxyvitamin D3	0.6508	NA	NA	MS2 reverse	383.329	33.206
1435	positive	NA	NA	3-Hydroxy-cis-5-tetradecenoylcarnitine;3beta-(1-Pyrrolidinyl)-5alpha-pregne-11,20-dione	16.7118165148786;-22.9376271229931	MS1 mz matched	386.289	197.603
1440	positive	NA	NA	Porson;Gingerenone B;Isogingerenone B;Burseran;(+)-Burseran;(+)-Eudesmin;Pinoresinol dimethyl ether	2.74850952481818;2.74850952481818;2.74850952481818;2.84846502680859;2.84846502680859	MS1 mz matched	387.179	37.607
1443	positive	NA	NA	dCDP;Nemopride	8.94640529254741;23.4104129643047	MS1 mz matched	388.18	394.796
1460	positive	NA	NA	Petunidin;Petunidin;Petunidin chloride	-8.46648817626558;-8.52187992683326	MS1 mz matched	390.993	352.44
1462	positive	NA	NA	NA	NA	Unmapped	391.101	297.856
1463	positive	NA	NA	Nutriacholic acid;9'-Carboxy-alpha-chromanol;7-Hydroxy-3-oxocholanoic acid;D8'-Merulinic acid A;7a-Hydroxy-3-oxo-5b-cholanoic acid;12-Ketodeoxycholic acid;Bis(2-ethylhexyl)phthalate;Di(2-ethylhexyl)phthalate;Dioctyl phthalate;DEHP;3alpha,12alpha-Dihydroxy-5beta-chol-6-enoate;Di-n-octyl phthalate;Bis(n-octyl) phthalate;Dioctyl 1,2-benzenedicarboxylate;Diisooctyl phthalate;Apocholic acid;3alpha,12a…	16.3703255820304;16.3703255820304;16.3703255820304;16.3703255820304;16.3703255820304;16.3703255820304;16.3951801310127;16.3951801310127;16.3951801310127;16.3951801310127;16.3951801310127	MS1 mz matched	391.283	31.8695
1486	positive	NA	NA	Ciprofloxacin;	-4.527051395679;	MS1 mz matched	395.359	34.429
1487	positive	NA	NA	(Z)-N-Feruloyl-5-hydroxyanthranilic acid;Desulfoglucotropeolin	-11.9639027358134;-22.1821592842715	MS1 mz matched	396.042	343.687
1497	positive	NA	NA	4-O-Methylmelleolide;Clausarinol;Eplerenone;Armillarin;Armillaripin;Magnoshinin;Eplerenone;Estra-1,3,5(10)-triene-3,6alpha,17beta-triol triacetate;Estra-1,3,5(10)-triene-3,6beta,17beta-triol triacetate	-0.57628574917635;-0.57628574917635;-0.57628574917635;-0.57628574917635;-0.57628574917635;-0.482853626319191;-0.482853626319191;-0.482853626319191;-0.482853626319191	MS1 mz matched	397.2	35.909
1502	positive	Histidinyl-Lysine	0.9526	NA	NA	MS2 reverse	398.032	292.288
1508	positive	NA	NA	9-Hexadecenoylcarnitine;trans-Hexadec-2-enoyl carnitine;Solanidine	16.1723680382859;16.1723680382859;-22.3124534240085	MS1 mz matched	398.326	170.635
1510	positive	NA	NA	Phenkapton	-7.7141	MS1 mz matched	398.923	352.44
1521	positive	NA	NA	NA	NA	Unmapped	400.268	291.371
1525	positive	L-Palmitoylcarnitine	0.9873	NA	NA	MS2 forward	400.341	169.967
1547	positive	NA	NA	Inositol 1,3,4-trisphosphate;Inositol 1,4,5-trisphosphate;Pyrazoxyfen	-18.0911202116092;-18.0911202116092;5.47190450621122	MS1 mz matched	403.072	253.024
1556	positive	NA	NA	Azoxystrobin	12.8995	MS1 mz matched	404.13	380.841
1567	positive	NA	NA	(-)TAN-67;(+)TAN-67	-14.2363684591912;-14.2363684591912	MS1 mz matched	405.209	37.823
1574	positive	NA	NA	7-Chloro-3,4',5,6,8-pentamethoxyflavone;	-16.9056468681851;	MS1 mz matched	407.075	297.94
1589	positive	NA	NA	Q;Queuosine;Linustatin	4.67405009874696;4.67405009874696;7.96887748373198	MS1 mz matched	410.162	342.646
1600	positive	NA	NA	LPA(P-16:0e/0:0);Stanolone benzoate;Dihydrotestosterone benzoate;DHT benzoate	9.06661832695983;3.04374778689857	MS1 mz matched	412.284	244.174
1601	positive	NA	NA	3-Hydroxyhexadecadienoylcarnitine;Cyclopamine	15.1829097768954;-21.83708538519	MS1 mz matched	412.305	194.409
1607	positive	NA	NA	dIDP;GF 109203X;Bisindolylmaleimide I	19.7510491900227;11.5022610621078	MS1 mz matched	413.195	35.9155
1619	positive	NA	NA	Chenodeoxyglycocholic acid;Deoxycholic acid glycine conjugate;Chenodeoxycholic acid glycine conjugate;Glycoursodeoxycholic acid;Glycodeoxycholate;Glycodeoxycholic acid;3alpha,12alpha-Dihydroxy-5beta-cholan-24-oylglycine;Glycochenodeoxycholate;Glycochenodeoxycholic acid;Chenodeoxyglycocholate	-2.50047781995797;-2.50047781995797;-2.50047781995797;-2.50047781995797;-2.44817600873886;-2.44817600873886	MS1 mz matched	414.3	201.351
1620	positive	NA	NA	Se-Adenosylselenohomocysteine;	-13.9111080198202;	MS1 mz matched	414.299	224.298
1625	positive	NA	NA	NA	NA	Unmapped	414.743	321.052
1627	positive	NA	NA	Flusulfamide	-18.3599	MS1 mz matched	414.954	352.43
1629	positive	NA	NA	4-O-Methylmelleolide;Clausarinol;Eplerenone;Armillarin;Armillaripin;Magnoshinin;Eplerenone;Estra-1,3,5(10)-triene-3,6alpha,17beta-triol triacetate;Estra-1,3,5(10)-triene-3,6beta,17beta-triol triacetate	-0.57628574917635;-0.57628574917635;-0.57628574917635;-0.57628574917635;-0.57628574917635;-0.482853626319191;-0.482853626319191;-0.482853626319191;-0.482853626319191	MS1 mz matched	415.211	36.4385
1641	positive	NA	NA	Alpinine	-21.0299	MS1 mz matched	416.191	207.304
1642	positive	NA	NA	NA	NA	Unmapped	416.196	342.451
1674	positive	NA	NA	NA	NA	Unmapped	422.884	352.413
1683	positive	NA	NA	Linoleyl carnitine;Linoelaidyl carnitine;	15.0101646827849;15.0101646827849;	MS1 mz matched	424.341	168.726
1696	positive	NA	NA	11Z-Octadecenylcarnitine;Elaidic carnitine;Vaccenyl carnitine;Oleoylcarnitine;	14.4314212658101;14.4314212658101;14.4314212658101;14.4314212658101;	MS1 mz matched	426.357	152.517
1709	positive	NA	NA	Cefpodoxime;Cefpodoxime	14.4706938584242;14.5285317306986	MS1 mz matched	428.068	132.481
1713	positive	Stearoylcarnitine	0.9904	NA	NA	MS2 forward	428.371	166.715
1731	positive	NA	NA	Hexadecanedioic acid mono-L-carnitine ester;Imperialine;Cevan-6-one, 3,20-dihydroxy-, (3-beta,5-alpha,17-beta)-;Kashmirine;Peiminine	14.3497639654406;-21.1993978328717	MS1 mz matched	430.315	265.849
1733	positive	NA	NA	alpha-(Methoxyimino)-N-methyl-2-[[[1-[3-(trifluoromethyl)phenyl]ethoxy]imino]methyl]benzeneacetamide;	-8.10041967543897;	MS1 mz matched	430.378	32.159
1740	positive	NA	NA	4-O-Methylmelleolide;Clausarinol;Eplerenone;Armillarin;Armillaripin;Magnoshinin;Eplerenone;Estra-1,3,5(10)-triene-3,6alpha,17beta-triol triacetate;Estra-1,3,5(10)-triene-3,6beta,17beta-triol triacetate	-0.57628574917635;-0.57628574917635;-0.57628574917635;-0.57628574917635;-0.57628574917635;-0.482853626319191;-0.482853626319191;-0.482853626319191;-0.482853626319191	MS1 mz matched	432.237	36.73
1745	positive	NA	NA	NA	NA	Unmapped	433.004	352.437
1747	positive	NA	NA	15beta-hydroxycyproterone acetate;Armillaricin;Zizybeoside I	-3.12770183036914;-3.12770183036914;13.4208558247559	MS1 mz matched	433.177	33.455
1756	positive	Glycolithocholic acid	0.6217	NA	NA	MS2 forward	434.316	201.159
1772	positive	NA	NA	4-O-Methylmelleolide;Clausarinol;Eplerenone;Armillarin;Armillaripin;Magnoshinin;Eplerenone;Estra-1,3,5(10)-triene-3,6alpha,17beta-triol triacetate;Estra-1,3,5(10)-triene-3,6beta,17beta-triol triacetate	-0.57628574917635;-0.57628574917635;-0.57628574917635;-0.57628574917635;-0.57628574917635;-0.482853626319191;-0.482853626319191;-0.482853626319191;-0.482853626319191	MS1 mz matched	437.192	36.187
1781	positive	NA	NA	NA	NA	Unmapped	438.378	35.44
1782	positive	NA	NA	NA	NA	Unmapped	438.916	352.445
1797	positive	NA	NA	LysoPE(0:0/15:0);LysoPE(15:0/0:0);	13.9066438905746;13.9066438905746;	MS1 mz matched	440.276	199.455
1812	positive	NA	NA	Folic acid;Folate;Pteroylglutamic acid;Folic acid	1.40567960712913;1.36351603359843	MS1 mz matched	442.14	308.57
1828	positive	NA	NA	Proansamitocin	-20.695	MS1 mz matched	444.222	207.321
1829	positive	NA	NA	NA	NA	Unmapped	444.331	35.883
1835	positive	NA	NA	Difecoum	17.3901	MS1 mz matched	445.18	299.323
1839	positive	Desmosterol	0.6178	NA	NA	MS2 reverse	445.366	32.2695
1848	positive	NA	NA	NA	NA	Unmapped	446.398	32.849
1859	positive	NA	NA	Aripiprazole;Aripiprazole	-14.0918605518485;-14.0191787060406	MS1 mz matched	448.142	380.599
1872	positive	Glycochenodeoxycholate	0.993	NA	NA	MS2 forward	450.321	201.499
1893	positive	LysoPE(16:0/0:0)	0.959	NA	NA	MS2 forward	454.292	195.925
1894	positive	NA	NA	10-Deoxymethymycin;YC-17	13.5234	MS1 mz matched	454.315	258.633
1912	positive	NA	NA	NA	NA	Unmapped	456.331	254.894
1916	positive	NA	NA	NA	NA	Unmapped	456.965	352.379
1931	positive	NA	NA	NA	NA	Unmapped	458.347	248.094
1945	positive	NA	NA	Thioguanosine 5'-diphosphate;Militarinone A	5.16641663872053;13.6583434688881	MS1 mz matched	460.268	36.565
1952	positive	NA	NA	NA	NA	Unmapped	460.923	351.901
1956	positive	7-Ketocholesterol	0.6168	NA	NA	MS2 reverse	461.362	34.234
1961	positive	NA	NA	NA	NA	Unmapped	462.266	194.908
1967	positive	NA	NA	NA	NA	Unmapped	462.902	351.831
1979	positive	NA	NA	Taurodeoxycholic acid;Taurochenodesoxycholic acid;Tauroursodeoxycholic acid;Taurodeoxycholate;Taurodeoxycholic acid;Taurochenodeoxycholate;Taurochenodeoxycholic acid;Chenodeoxycholoyltaurine;Tauroursodeoxycholic acid	-1.51993776539994;-1.51993776539994;-1.51993776539994;-1.60225340924788;-1.60225340924788;-1.60225340924788	MS1 mz matched	464.282	155
1982	positive	NA	NA	NA	NA	Unmapped	464.282	189.167
1987	positive	NA	NA	Sulfasalazine;Sulfasalazine;Salicylazosulfapyridine;Salazosulfapyridine	8.81682445488217;8.79245657476269	MS1 mz matched	465.031	236.049
1995	positive	Glycocholic acid	0.9971	NA	NA	MS2 forward	466.315	244.199
2002	positive	LysoPC(14:0)	0.9928	NA	NA	MS2 forward	468.307	193.862
2023	positive	NA	NA	Chenodeoxyglycocholic acid;Deoxycholic acid glycine conjugate;Chenodeoxycholic acid glycine conjugate;Glycoursodeoxycholic acid;Glycodeoxycholate;Glycodeoxycholic acid;3alpha,12alpha-Dihydroxy-5beta-cholan-24-oylglycine;Glycochenodeoxycholate;Glycochenodeoxycholic acid;Chenodeoxyglycocholate	-2.50047781995797;-2.50047781995797;-2.50047781995797;-2.50047781995797;-2.44817600873886;-2.44817600873886	MS1 mz matched	472.302	201.517
2026	positive	NA	NA	NA	NA	Unmapped	472.996	352.438
2043	positive	NA	NA	NA	NA	Unmapped	476.743	321.052
2053	positive	NA	NA	LysoPE(18:2(9Z,12Z)/0:0);LysoPE(0:0/18:2(9Z,12Z));	-3.22511342423645;-3.22511342423645;	MS1 mz matched	478.292	194.74
2054	positive	NA	NA	LysoPC(16:0);	1.03062086747797;	MS1 mz matched	478.328	189.469
2068	positive	NA	NA	LysoPE(0:0/18:1(9Z));LysoPE(18:1(11Z)/0:0);LysoPE(0:0/18:1(11Z));LysoPE(18:1(9Z)/0:0);	12.864971092642;12.864971092642;12.864971092642;12.864971092642;	MS1 mz matched	480.307	193.289
2069	positive	NA	NA	LysoPC(P-16:0);	12.7471883558065;	MS1 mz matched	480.344	181.349
2076	positive	NA	NA	2,3-Dehydrosilychristin;2,3-Dehydrosilybin;Cryptocyanin;Cryptocyanine iodide	15.3777168705183;15.3777168705183;14.2256623763132	MS1 mz matched	481.113	309.252
2086	positive	NA	NA	Sodium picosulfate	-12.1548	MS1 mz matched	481.982	235.647
2091	positive	LysoPE(18:0/0:0)	0.9163	NA	NA	MS2 reverse	482.324	191.906
2092	positive	NA	NA	1-O-Hexadecyl-lyso-sn-glycero-3-phosphocholine;1-O-Hexadecyl-2-lyso-sn-glycero-3-phosphocholine	12.4655	MS1 mz matched	482.359	193.099
2093	positive	NA	NA	NA	NA	Unmapped	482.404	35.885
2095	positive	NA	NA	NA	NA	Unmapped	482.906	351.868
2113	positive	NA	NA	Stigmatellin Y	-3.09737	MS1 mz matched	485.289	34.6855
2130	positive	NA	NA	Chenodeoxyglycocholic acid;Deoxycholic acid glycine conjugate;Chenodeoxycholic acid glycine conjugate;Glycoursodeoxycholic acid;Glycodeoxycholate;Glycodeoxycholic acid;3alpha,12alpha-Dihydroxy-5beta-cholan-24-oylglycine;Glycochenodeoxycholate;Glycochenodeoxycholic acid;Chenodeoxyglycocholate	-2.50047781995797;-2.50047781995797;-2.50047781995797;-2.50047781995797;-2.44817600873886;-2.44817600873886	MS1 mz matched	488.271	201.457
2133	positive	NA	NA	NA	NA	Unmapped	488.357	36.749
2144	positive	NA	NA	LysoPC(14:0);Buprenorphine	-2.5450395316692;-7.70377116719371	MS1 mz matched	490.29	194.718
2150	positive	NA	NA	Cer(d18:1/14:0);N-(Tetradecanoyl)-sphing-4-enine	2.36534921848474;2.35533900402103	MS1 mz matched	492.476	35.255
2156	positive	NA	NA	LysoPC(16:1(9Z));Tiamulin	12.8346645225288;1.15736870150011	MS1 mz matched	494.323	190.685
2158	positive	NA	NA	NA	NA	Unmapped	494.777	190.069
2163	positive	NA	NA	6'-Oxo-G418	14.6134	MS1 mz matched	495.266	31.6985
2165	positive	NA	NA	NA	NA	Unmapped	495.378	201.873
2182	positive	NA	NA	NA	NA	Unmapped	498.085	333.471
2197	positive	Taurochenodeoxycholate	0.9922	NA	NA	MS2 forward	500.303	133.219
2206	positive	NA	NA	NA	NA	Unmapped	502.292	191.31
2207	positive	NA	NA	Stigmatellin Y	-3.09737	MS1 mz matched	502.315	34.7765
2241	positive	NA	NA	Gymnodimine;Gymnodimine;Gymnodimine A;GYM A	8.10758740082598;8.02657516757631	MS1 mz matched	508.339	189.462
2254	positive	NA	NA	Delphinidin 3-glucoside;	-6.87603919524854;	MS1 mz matched	510.354	188.224
2256	positive	LysoPC(O-18:0)	0.6158	NA	NA	MS2 forward	510.389	190.685
2259	positive	NA	NA	Cer(d18:1/14:0);N-(Tetradecanoyl)-sphing-4-enine	2.36534921848474;2.35533900402103	MS1 mz matched	510.486	35.134
2268	positive	NA	NA	NA	NA	Unmapped	511.373	244.515
2281	positive	NA	NA	Cer(d18:0/14:0);	-16.5103786791611;	MS1 mz matched	512.502	33.274
2283	positive	NA	NA	NA	NA	Unmapped	513.125	342.788
2298	positive	NA	NA	NA	NA	Unmapped	515.007	352.443
2303	positive	NA	NA	Taurallocholic acid;Taurocholic acid;Taurohyocholate;Tauro-b-muricholic acid;Tauroursocholic acid;Taurocholate;Taurocholic acid;Cholyltaurine;Taurohyocholate;N-(3alpha,6alpha,7alpha-Trihydroxy-5beta-cholan-24-oyl)taurine	-3.24767522182381;-3.24767522182381;-3.24767522182381;-3.24767522182381;-3.24767522182381;-3.29910223670983;-3.29910223670983	MS1 mz matched	516.294	36.9205
2304	positive	Taurocholate	0.9662	NA	NA	MS2 forward	516.299	194.271
2312	positive	Taurodeoxycholic acid	0.9948	NA	NA	MS2 forward	517.329	155.032
2326	positive	NA	NA	NA	NA	Unmapped	518.965	352.443
2337	positive	NA	NA	LysoPC(18:2(9Z,12Z));	0.98299261136157;	MS1 mz matched	520.339	188.259
2339	positive	NA	NA	3-Demethylsimmondsin 2'-(Z)-ferulate;4-Demethylsimmondsin 2'-(E)-ferulate;	-0.186041977348827;-0.186041977348827;	MS1 mz matched	520.507	35.1805
2346	positive	NA	NA	Melleolide D;	14.4942240517257;	MS1 mz matched	521.927	352.392
2348	positive	NA	NA	Taurodeoxycholic acid;Taurochenodesoxycholic acid;Tauroursodeoxycholic acid;Taurodeoxycholate;Taurodeoxycholic acid;Taurochenodeoxycholate;Taurochenodeoxycholic acid;Chenodeoxycholoyltaurine;Tauroursodeoxycholic acid	-1.51993776539994;-1.51993776539994;-1.51993776539994;-1.60225340924788;-1.60225340924788;-1.60225340924788	MS1 mz matched	522.284	154.904
2358	positive	NA	NA	NA	NA	Unmapped	523.046	292.336
2367	positive	LysoPC(18:0)	0.9842	NA	NA	MS2 forward	524.37	186.406
2368	positive	1-Stearoyl-sn-glycerol 3-phosphocholine	0.9972	NA	NA	MS2 forward	524.37	168.73
2378	positive	NA	NA	LysoPE(22:6(4Z,7Z,10Z,13Z,16Z,19Z)/0:0);LysoPE(0:0/22:6(4Z,7Z,10Z,13Z,16Z,19Z));Protoverine	2.78077329522325;2.78077329522325;-12.9451366073583	MS1 mz matched	526.292	190.084
2401	positive	NA	NA	NA	NA	Unmapped	528.849	351.728
2413	positive	NA	NA	Cinncassiol D2 glucoside;	-0.184088705150936;	MS1 mz matched	531.273	32.275
2437	positive	NA	NA	NA	NA	Unmapped	536.164	30.576
2443	positive	NA	NA	Moexipril;Moexipril	-13.2497291048336;-13.2467185268841	MS1 mz matched	537.194	380.81
2449	positive	NA	NA	Eujambolin;	2.51691099020716;	MS1 mz matched	538.163	30.7455
2452	positive	NA	NA	LysoPE(22:0/0:0);LysoPE(0:0/22:0);	10.6619830769387;10.6619830769387;	MS1 mz matched	538.385	185.156
2454	positive	NA	NA	3-Demethylsimmondsin 2'-(Z)-ferulate;4-Demethylsimmondsin 2'-(E)-ferulate;	-0.186041977348827;-0.186041977348827;	MS1 mz matched	538.518	35.037
2456	positive	NA	NA	NA	NA	Unmapped	538.968	352.43
2468	positive	NA	NA	NA	NA	Unmapped	540.532	34.062
2477	positive	NA	NA	LysoPC(18:2(9Z,12Z));	0.98299261136157;	MS1 mz matched	542.322	187.049
2480	positive	NA	NA	NA	NA	Unmapped	542.926	352.39
2486	positive	LysoPC(18:1(9Z))	0.9773	NA	NA	MS2 forward	544.339	185.352
2500	positive	NA	NA	Glycochenodeoxycholate-3-sulfate;N-[(3a,5b,7b)-7-hydroxy-24-oxo-3-(sulfooxy)cholan-24-yl]-Glycine;N-[(3a,5b,7a)-3-hydroxy-24-oxo-7-(sulfooxy)cholan-24-yl]-Glycine;Glycochenodeoxycholate 7-sulfate	-7.44042364167794;-7.44042364167794;-7.44042364167794;-7.36862729451121	MS1 mz matched	547.303	224.756
2508	positive	NA	NA	Stigmatellin Y	-3.09737	MS1 mz matched	548.299	32.2845
2532	positive	NA	NA	Quercetin 3-(6''-malonyl-glucoside);Echinenone;Hydroxychlorobactene	-0.802262391211301;8.28174381986211;8.28174381986211	MS1 mz matched	551.422	33.624
2553	positive	Cytidine 5'-diphosphocholine (CDP-choline)	0.8178	NA	NA	MS2 reverse	555.052	343.659
2562	positive	NA	NA	NA	NA	Unmapped	556.173	32.013
2594	positive	NA	NA	6-Mercaptopurine ribonucleoside triphosphate;6-Thioinosine triphosphate;6-Mercaptopurine ribonucleoside triphosphate;6-Thioinosine-5'-triphosphate	5.88445328448396;5.88445328448396;5.91651717921387	MS1 mz matched	562.929	352.437
2599	positive	NA	NA	NA	NA	Unmapped	563.549	34.745
2614	positive	NA	NA	NA	NA	Unmapped	566.887	352.191
2629	positive	NA	NA	NA	NA	Unmapped	568.425	33.85
2662	positive	NA	NA	LysoPC(P-18:0);	-7.63744129947592;	MS1 mz matched	574.316	188.87
2676	positive	NA	NA	NA	NA	Unmapped	576.699	321.052
2678	positive	NA	NA	Ceftriaxone;Ceftriaxone	-3.71268773425486;-3.79029831640596	MS1 mz matched	577.033	343.701
2689	positive	NA	NA	Pipercyclobutanamide B;Dipiperamide D;Salannin	10.6710066319188;10.6710066319188;-5.86954352565187	MS1 mz matched	579.291	240.313
2701	positive	NA	NA	Atorvastatin;Atorvastatin	5.37319100444338;5.37390752925476	MS1 mz matched	581.239	35.9885
2738	positive	NA	NA	NA	NA	Unmapped	588.869	352.195
2745	positive	NA	NA	D-Urobilinogen;I-Urobilin;D-Urobilinogen;Urobilin;I-Urobilin	9.33787311098066;9.33787311098066;9.39733390948652;9.39733390948652	MS1 mz matched	591.316	277.303
2753	positive	NA	NA	NA	NA	Unmapped	592.367	298.855
2754	positive	NA	NA	NA	NA	Unmapped	592.405	244.156
2775	positive	NA	NA	Cer(d18:0/20:0);	-19.9656758156145;	MS1 mz matched	597.01	352.447
2778	positive	NA	NA	Pipercyclobutanamide B;Dipiperamide D;Berbamunine;(1S)-1,2,3,4-Tetrahydro-1-[[4-[2-hydroxy-5-[[(1R)-1,2,3,4-tetrahydro-7-hydroxy-6-methoxy-2-methyl-1-isoquinolinyl]methyl]phenoxy]phenyl]methyl]-6-methoxy-2-methyl-7-isoquinolinol;Guattegaumerine;N,N'-Dimethyllindoldhamine;Magnoline	-4.67998408800765;-4.67998408800765;-4.6179338880527;-4.6179338880527;-4.6179338880527	MS1 mz matched	597.286	189.455
2788	positive	NA	NA	NA	NA	Unmapped	598.871	352.078
2810	positive	NA	NA	NA	NA	Unmapped	601.517	31.63
2813	positive	NA	NA	LysoPE(0:0/24:1(15Z));LysoPE(24:1(15Z)/0:0);	-3.70912000858044;-3.70912000858044;	MS1 mz matched	602.347	186.41
2824	positive	NA	NA	NA	NA	Unmapped	603.931	352.432
2827	positive	NA	NA	NA	NA	Unmapped	604.432	352.452
2837	positive	Isoleucyl-Tyrosine	0.9945	NA	NA	MS2 reverse	606.347	290.322
2845	positive	NA	NA	NA	NA	Unmapped	607.389	31.409
2856	positive	NA	NA	Torvoside G;	7.07239250496888;	MS1 mz matched	609.397	172.241
2863	positive	NA	NA	NA	NA	Unmapped	610.851	352.314
2870	positive	NA	NA	NA	NA	Unmapped	612.832	350.689
2889	positive	NA	NA	NA	NA	Unmapped	616.906	352.439
2891	positive	NA	NA	DG(20:3(8Z,11Z,14Z)/16:1(9Z)/0:0);DG(18:1n9/0:0/18:3n6);DG(18:1(11Z)/18:3(9Z,12Z,15Z)/0:0);DG(18:1n7/0:0/18:3n6);DG(18:1(9Z)/18:3(6Z,9Z,12Z)/0:0);DG(14:0/22:4(7Z,10Z,13Z,16Z)/0:0);DG(20:3(5Z,8Z,11Z)/16:1(9Z)/0:0);DG(16:1(9Z)/20:3(5Z,8Z,11Z)/0:0);DG(18:1(11Z)/18:3(6Z,9Z,12Z)/0:0);DG(16:0/20:4(5Z,8Z,11Z,14Z)/0:0);DG(14:0/0:0/22:4n6);DG(16:1(9Z)/20:3(8Z,11Z,14Z)/0:0);DG(16:1n7/0:0/20:3n6);DG(16:0/20…	-1.09536526864546;-1.09536526864546;-1.09536526864546;-1.09536526864546;-1.09536526864546;-1.09536526864546;-1.09536526864546;-1.09536526864546;-1.09536526864546;-1.09536526864546;-1.09536526864546;-1.09536526864546;-1.09536526864546;-1.09536526864546;-1.	MS1 mz matched	617.512	31.958
2895	positive	NA	NA	Neuromedin N;Lolicine B	6.80997829270436;18.5517710242363	MS1 mz matched	618.383	291.084
2905	positive	NA	NA	NA	NA	Unmapped	619.613	34.462
2907	positive	NA	NA	NA	NA	Unmapped	620.095	236.055
2910	positive	NA	NA	NA	NA	Unmapped	620.399	287.202
2916	positive	NA	NA	NA	NA	Unmapped	620.971	352.44
2918	positive	NA	NA	NA	NA	Unmapped	621.301	237.19
2919	positive	NA	NA	NA	NA	Unmapped	621.309	31.4935
2937	positive	NA	NA	NA	NA	Unmapped	623.824	350.571
2943	positive	NA	NA	NA	NA	Unmapped	624.929	352.409
2957	positive	1-Stearoyl-2-arachidonoyl-sn-glycerol	0.741	NA	NA	MS2 forward	627.533	185.174
2971	positive	NA	NA	NA	NA	Unmapped	629.389	279.005
2974	positive	NA	NA	NA	NA	Unmapped	630.192	31.73
2985	positive	NA	NA	NA	NA	Unmapped	631.394	251.913
2990	positive	NA	NA	C-Toxiferine I;Toxiferine I	7.97575	MS1 mz matched	632.399	289.256
2997	positive	NA	NA	Mulberrofuran E;3-Hydroxyethylchlorophyllide a;3-Devinyl-3-(1-hydroxyethyl)chlorophyllide a;Bacteriochlorophyllide a	9.46142345827961;-2.37248486960146;-2.37248486960146	MS1 mz matched	633.254	260.543
3010	positive	NA	NA	DG(20:3(8Z,11Z,14Z)/16:1(9Z)/0:0);DG(18:1n9/0:0/18:3n6);DG(18:1(11Z)/18:3(9Z,12Z,15Z)/0:0);DG(18:1n7/0:0/18:3n6);DG(18:1(9Z)/18:3(6Z,9Z,12Z)/0:0);DG(14:0/22:4(7Z,10Z,13Z,16Z)/0:0);DG(20:3(5Z,8Z,11Z)/16:1(9Z)/0:0);DG(16:1(9Z)/20:3(5Z,8Z,11Z)/0:0);DG(18:1(11Z)/18:3(6Z,9Z,12Z)/0:0);DG(16:0/20:4(5Z,8Z,11Z,14Z)/0:0);DG(14:0/0:0/22:4n6);DG(16:1(9Z)/20:3(8Z,11Z,14Z)/0:0);DG(16:1n7/0:0/20:3n6);DG(16:0/20…	-1.09536526864546;-1.09536526864546;-1.09536526864546;-1.09536526864546;-1.09536526864546;-1.09536526864546;-1.09536526864546;-1.09536526864546;-1.09536526864546;-1.09536526864546;-1.09536526864546;-1.09536526864546;-1.09536526864546;-1.09536526864546;-1.	MS1 mz matched	634.539	31.8805
3018	positive	NA	NA	NA	NA	Unmapped	636.073	236.054
3019	positive	NA	NA	NA	NA	Unmapped	636.517	48.709
3023	positive	NA	NA	Calafatimine;Thalsimine	19.4881653402203;19.4881653402203	MS1 mz matched	637.304	32.04
3026	positive	NA	NA	Ginsenoside Rh7;Ginsenoside Rh8;Fasciculic acid B;	5.84918262154249;5.84918262154249;5.84918262154249;	MS1 mz matched	637.428	171.753
3033	positive	NA	NA	NA	NA	Unmapped	638.353	289.808
3044	positive	NA	NA	NA	NA	Unmapped	640.367	288.883
3065	positive	NA	NA	Lanceotoxin A;Scilliroside;Scillirosidin 3-O-beta-D-glucoside	18.8623488652769;18.8623488652769	MS1 mz matched	643.283	236.674
3066	positive	NA	NA	NA	NA	Unmapped	643.378	331.113
3073	positive	NA	NA	NA	NA	Unmapped	644.399	313.912
3075	positive	NA	NA	Galactosylceramide (d18:1/12:0) ;Glucosylceramide (d18:1/12:0);	-4.54203855822648;-4.54203855822648;	MS1 mz matched	644.932	352.437
3079	positive	NA	NA	NA	NA	Unmapped	645.434	352.445
3084	positive	NA	NA	NA	NA	Unmapped	646.414	278.296
3095	positive	NA	NA	SM(d18:1/12:0);	8.37558198406358;	MS1 mz matched	647.51	179.543
3102	positive	NA	NA	NA	NA	Unmapped	648.518	31.972
3104	positive	NA	NA	(R)-Rutaretin 1'-(6''-sinapoylglucoside);	-9.99059140021022;	MS1 mz matched	648.627	34.466
3105	positive	NA	NA	PE(P-16:0/14:0);PE(14:0/P-16:0);	-24.6856106219946;-24.6856106219946;	MS1 mz matched	648.891	352.42
3126	positive	NA	NA	Ginsenoside Rh5;	-23.5639805370262;	MS1 mz matched	653.44	31.8535
3131	positive	NA	NA	Calafatimine;Thalsimine	19.4881653402203;19.4881653402203	MS1 mz matched	654.33	32.125
3137	positive	NA	NA	Mulberrofuran E;3-Hydroxyethylchlorophyllide a;3-Devinyl-3-(1-hydroxyethyl)chlorophyllide a;Bacteriochlorophyllide a	9.46142345827961;-2.37248486960146;-2.37248486960146	MS1 mz matched	655.236	260.096
3152	positive	NA	NA	NA	NA	Unmapped	657.234	515.542
3164	positive	NA	NA	DG(20:3(8Z,11Z,14Z)/16:1(9Z)/0:0);DG(18:1n9/0:0/18:3n6);DG(18:1(11Z)/18:3(9Z,12Z,15Z)/0:0);DG(18:1n7/0:0/18:3n6);DG(18:1(9Z)/18:3(6Z,9Z,12Z)/0:0);DG(14:0/22:4(7Z,10Z,13Z,16Z)/0:0);DG(20:3(5Z,8Z,11Z)/16:1(9Z)/0:0);DG(16:1(9Z)/20:3(5Z,8Z,11Z)/0:0);DG(18:1(11Z)/18:3(6Z,9Z,12Z)/0:0);DG(16:0/20:4(5Z,8Z,11Z,14Z)/0:0);DG(14:0/0:0/22:4n6);DG(16:1(9Z)/20:3(8Z,11Z,14Z)/0:0);DG(16:1n7/0:0/20:3n6);DG(16:0/20…	-1.09536526864546;-1.09536526864546;-1.09536526864546;-1.09536526864546;-1.09536526864546;-1.09536526864546;-1.09536526864546;-1.09536526864546;-1.09536526864546;-1.09536526864546;-1.09536526864546;-1.09536526864546;-1.09536526864546;-1.09536526864546;-1.	MS1 mz matched	658.538	32.013
3182	positive	NA	NA	NA	NA	Unmapped	661.526	178.468
3196	positive	NA	NA	Goyaglycoside c;	8.47836064559745;	MS1 mz matched	663.453	31.3535
3202	positive	NA	NA	1-Palmitoyl-2-(5-keto-6-octendioyl)-sn-glycero-3-phosphatidylcholine	-10.4892	MS1 mz matched	664.368	282.258
3212	positive	NA	NA	Angiotensin (1-5)	-21.6752	MS1 mz matched	665.355	244.194
3218	positive	NA	NA	NA	NA	Unmapped	666.057	21.598
3237	positive	NA	NA	NA	NA	Unmapped	668.893	352.437
3240	positive	NA	NA	NA	NA	Unmapped	669.396	352.437
3245	positive	NA	NA	NA	NA	Unmapped	670.403	253.234
3246	positive	NA	NA	PE(P-16:0/14:0);PE(14:0/P-16:0);	-16.9734160242238;-16.9734160242238;	MS1 mz matched	670.466	31.949
3258	positive	NA	NA	NA	NA	Unmapped	673.527	177.745
3261	positive	NA	NA	NA	NA	Unmapped	674.02	236.068
3267	positive	NA	NA	NA	NA	Unmapped	674.832	351.229
3271	positive	NA	NA	Cimicifugoside	-23.9928	MS1 mz matched	675.35	273.55
3278	positive	NA	NA	Adenosine thiamine diphosphate;	-4.44747531640683;	MS1 mz matched	675.542	177.635
3279	positive	NA	NA	Adenosine thiamine diphosphate;	2.59077402530002;	MS1 mz matched	675.542	42.49
3280	positive	NA	NA	NA	NA	Unmapped	675.675	33.729
3287	positive	NA	NA	NA	NA	Unmapped	676.655	321.028
3299	positive	NA	NA	PC(14:0/14:0);PE(15:0/16:0);PE(16:0/15:0);	7.90695695212832;7.90695695212832;7.90695695212832;	MS1 mz matched	678.505	148.767
3304	positive	NA	NA	DG(18:4n3/0:0/22:6n3);DG(20:5(5Z,8Z,11Z,14Z,17Z)/20:5(5Z,8Z,11Z,14Z,17Z)/0:0);DG(18:4(6Z,9Z,12Z,15Z)/22:6(4Z,7Z,10Z,13Z,16Z,19Z)/0:0);DG(20:5n3/0:0/20:5n3);DG(22:6(4Z,7Z,10Z,13Z,16Z,19Z)/18:4(6Z,9Z,12Z,15Z)/0:0);	8.62375074765213;8.62375074765213;8.62375074765213;8.62375074765213;8.62375074765213;	MS1 mz matched	679.012	352.455
3313	positive	NA	NA	NA	NA	Unmapped	680.036	236.058
3314	positive	NA	NA	Goyaglycoside c;	8.47836064559745;	MS1 mz matched	680.479	31.411
3343	positive	NA	NA	NA	NA	Unmapped	685.934	352.447
3345	positive	NA	NA	NA	NA	Unmapped	686.121	343.081
3346	positive	NA	NA	NA	NA	Unmapped	686.436	352.454
3349	positive	NA	NA	NA	NA	Unmapped	686.572	35.783
3368	positive	NA	NA	NA	NA	Unmapped	689.558	176.63
3369	positive	NA	NA	NA	NA	Unmapped	689.558	42.27
3384	positive	NA	NA	NA	NA	Unmapped	692.855	352.237
3388	positive	NA	NA	Bismahanine;	-1.37669521729931;	MS1 mz matched	693.361	305.836
3402	positive	NA	NA	PE(18:3(9Z,12Z,15Z)/P-16:0);PE(18:3(6Z,9Z,12Z)/P-16:0);PE(P-16:0/18:3(6Z,9Z,12Z));PE(P-16:0/18:3(9Z,12Z,15Z));	-9.07833333735699;-9.07833333735699;-9.07833333735699;-9.07833333735699;	MS1 mz matched	698.498	31.676
3413	positive	NA	NA	NA	NA	Unmapped	701.558	42.089
3414	positive	NA	NA	NA	NA	Unmapped	701.558	158.922
3415	positive	NA	NA	NA	NA	Unmapped	701.558	175.804
3423	positive	NA	NA	NA	NA	Unmapped	702.974	352.447
3428	positive	NA	NA	SM(d18:0/16:1(9Z));	-2.2414925715948;	MS1 mz matched	703.573	42.1075
3429	positive	NA	NA	SM(d18:0/16:1(9Z));	0.605208687742487;	MS1 mz matched	703.574	175.774
3436	positive	NA	NA	NA	NA	Unmapped	704.211	31.498
3438	positive	NA	NA	PE(18:1(9Z)/15:0);PE(18:1(11Z)/15:0);PE(15:0/18:1(9Z));PC(16:0/14:1(9Z));PE(15:0/18:1(11Z));PC(14:0/16:1(9Z));PC(16:1(9Z)/14:0);PC(14:1(9Z)/16:0);	8.16065129090364;8.16065129090364;8.16065129090364;8.16065129090364;8.16065129090364;8.16065129090364;8.16065129090364;8.16065129090364;	MS1 mz matched	704.521	40.17
3450	positive	NA	NA	NA	NA	Unmapped	705.301	243.444
3458	positive	NA	NA	NA	NA	Unmapped	706.169	34.514
3461	positive	NA	NA	PC(14:0/16:0);PE-NMe(16:0/16:0);PE(18:0/15:0);PE(15:0/18:0);PC(15:0/15:0);PC(16:0/14:0);	-1.21171171196604;-1.21171171196604;-1.21171171196604;-1.21171171196604;-1.21171171196604;-1.21171171196604;	MS1 mz matched	706.536	147.549
3462	positive	NA	NA	PC(14:0/16:0);PE-NMe(16:0/16:0);PE(18:0/15:0);PE(15:0/18:0);PC(15:0/15:0);PC(16:0/14:0);	7.75972949730033;7.75972949730033;7.75972949730033;7.75972949730033;7.75972949730033;7.75972949730033;	MS1 mz matched	706.536	40.382
3466	positive	NA	NA	NA	NA	Unmapped	706.932	352.447
3477	positive	NA	NA	PE(P-16:0/14:0);PE(14:0/P-16:0);	-16.9734160242238;-16.9734160242238;	MS1 mz matched	708.51	31.455
3478	positive	NA	NA	NA	NA	Unmapped	708.51	584.428
3486	positive	NA	NA	NA	NA	Unmapped	709.895	352.39
3491	positive	NA	NA	NA	NA	Unmapped	711.069	185.207
3507	positive	NA	NA	NA	NA	Unmapped	714.604	35.705
3522	positive	NA	NA	PE(18:1(9Z)/16:1(9Z));PE(14:0/20:2(11Z,14Z));PE(18:1(11Z)/16:1(9Z));PE(16:1(9Z)/18:1(11Z));PE(20:1(11Z)/14:1(9Z));PE(14:1(9Z)/20:1(11Z));PE(18:2(9Z,12Z)/16:0);PE(16:1(9Z)/18:1(9Z));PE(20:2(11Z,14Z)/14:0);PE(16:0/18:2(9Z,12Z));	7.71523423995523;7.71523423995523;7.71523423995523;7.71523423995523;7.71523423995523;7.71523423995523;7.71523423995523;7.71523423995523;7.71523423995523;7.71523423995523;	MS1 mz matched	716.521	146.978
3538	positive	PE(16:0/18:1(9Z))	0.9894	NA	NA	MS2 reverse	718.535	146.374
3539	positive	NA	NA	PC(16:0/P-16:0);PC(P-18:0/14:0);PC(14:0/P-18:0);PC(P-16:0/16:0);PC(o-16:0/16:1(9Z));	7.76583229886284;7.76583229886284;7.76583229886284;7.76583229886284;7.76583229886284;	MS1 mz matched	718.573	40.191
3556	positive	NA	NA	NA	NA	Unmapped	721.876	352.217
3566	positive	NA	NA	Adenylyl-molybdopterin;Molybdopterin-AMP;	-3.87546211483849;-3.87546211483849;	MS1 mz matched	725.555	151.893
3568	positive	NA	NA	SM(d18:0/16:1(9Z));	-2.2414925715948;	MS1 mz matched	725.555	42.089
3571	positive	NA	NA	NA	NA	Unmapped	726.935	352.426
3573	positive	NA	NA	Torvoside D;	24.7211305861992;	MS1 mz matched	727.437	352.448
3575	positive	NA	NA	Ubiquinone-8;Coenzyme Q8	18.2654	MS1 mz matched	727.572	173.157
3589	positive	NA	NA	SM(d18:1/18:1(11Z));SM(d18:1/18:1(9Z));	7.8505506361171;7.8505506361171;	MS1 mz matched	729.589	42.294
3591	positive	NA	NA	NA	NA	Unmapped	729.589	173.768
3596	positive	NA	NA	PC(16:1(9Z)/16:1(9Z));PC(18:1(9Z)/14:1(9Z));PC(14:1(9Z)/18:1(9Z));PC(14:1(9Z)/18:1(11Z));PE(20:2(11Z,14Z)/15:0);PC(18:2(9Z,12Z)/14:0);PE(15:0/20:2(11Z,14Z));PC(18:1(11Z)/14:1(9Z));PC(14:0/18:2(9Z,12Z));	8.43826926807376;8.43826926807376;8.43826926807376;8.43826926807376;8.43826926807376;8.43826926807376;8.43826926807376;8.43826926807376;8.43826926807376;	MS1 mz matched	730.537	145.732
3597	positive	NA	NA	PC(16:1(9Z)/16:1(9Z));PC(18:1(9Z)/14:1(9Z));PC(14:1(9Z)/18:1(9Z));PC(14:1(9Z)/18:1(11Z));PE(20:2(11Z,14Z)/15:0);PC(18:2(9Z,12Z)/14:0);PE(15:0/20:2(11Z,14Z));PC(18:1(11Z)/14:1(9Z));PC(14:0/18:2(9Z,12Z));	8.20593298943841;8.20593298943841;8.20593298943841;8.20593298943841;8.20593298943841;8.20593298943841;8.20593298943841;8.20593298943841;8.20593298943841;	MS1 mz matched	730.537	39.975
3601	positive	NA	NA	NA	NA	Unmapped	730.893	352.431
3612	positive	NA	NA	NA	NA	Unmapped	732.553	145.726
3613	positive	NA	NA	Araliacerebroside;	-3.59752108002513;	MS1 mz matched	732.552	40.1495
3645	positive	NA	NA	NA	NA	Unmapped	738.606	34
3653	positive	NA	NA	NA	NA	Unmapped	739.911	352.425
3663	positive	NA	NA	PC(16:1(9Z)/P-18:1(9Z));PC(P-18:1(11Z)/16:1(9Z));PC(P-16:0/18:2(9Z,12Z));PC(o-16:1(9Z)/18:2(9Z,12Z));PC(16:1(9Z)/P-18:1(11Z));PC(P-18:1(9Z)/16:1(9Z));PC(18:2(9Z,12Z)/P-16:0);	7.95655487401521;7.95655487401521;7.95655487401521;7.95655487401521;7.95655487401521;7.95655487401521;7.95655487401521;	MS1 mz matched	742.573	140.837
3664	positive	NA	NA	PC(16:1(9Z)/P-18:1(9Z));PC(P-18:1(11Z)/16:1(9Z));PC(P-16:0/18:2(9Z,12Z));PC(o-16:1(9Z)/18:2(9Z,12Z));PC(16:1(9Z)/P-18:1(11Z));PC(P-18:1(9Z)/16:1(9Z));PC(18:2(9Z,12Z)/P-16:0);	7.54143977970174;7.54143977970174;7.54143977970174;7.54143977970174;7.54143977970174;7.54143977970174;7.54143977970174;	MS1 mz matched	742.573	39.729
3668	positive	NA	NA	Alliosterol 1-rhamnoside 16-galactoside;Avermectin A1a monosaccharide	-12.8072326438254;15.6694614664166	MS1 mz matched	743.441	68.2845
3676	positive	NA	NA	NA	NA	Unmapped	744.552	145.145
3690	positive	NA	NA	PC(P-18:0/16:0);PC(o-18:1(9Z)/16:0);PC(18:0/P-16:0);PC(16:0/P-18:0);PC(o-18:1(11Z)/16:0);PC(o-16:1(9Z)/18:0);PC(P-16:0/18:0);	5.8830642338049;5.8830642338049;5.8830642338049;5.8830642338049;5.8830642338049;5.8830642338049;5.8830642338049;	MS1 mz matched	746.603	143.926
3691	positive	NA	NA	PC(P-18:0/16:0);PC(o-18:1(9Z)/16:0);PC(18:0/P-16:0);PC(16:0/P-18:0);PC(o-18:1(11Z)/16:0);PC(o-16:1(9Z)/18:0);PC(P-16:0/18:0);	-3.40746375110971;-3.40746375110971;-3.40746375110971;-3.40746375110971;-3.40746375110971;-3.40746375110971;-3.40746375110971;	MS1 mz matched	746.603	40.201
3705	positive	NA	NA	NA	NA	Unmapped	750.541	138.993
3714	positive	NA	NA	NA	NA	Unmapped	752.876	352.426
3716	positive	NA	NA	PC(18:3(9Z,12Z,15Z)/16:1(9Z));PE(15:0/22:4(7Z,10Z,13Z,16Z));PC(20:4(5Z,8Z,11Z,14Z)/14:0);PC(16:1(9Z)/18:3(6Z,9Z,12Z));PC(14:0/20:4(5Z,8Z,11Z,14Z));PC(14:0/20:4(8Z,11Z,14Z,17Z));PC(16:0/18:4(6Z,9Z,12Z,15Z));PC(20:4(8Z,11Z,14Z,17Z)/14:0);PC(20:3(8Z,11Z,14Z)/14:1(9Z));PC(14:1(9Z)/20:3(5Z,8Z,11Z));PC(16:1(9Z)/18:3(9Z,12Z,15Z));PC(14:1(9Z)/20:3(8Z,11Z,14Z));PC(18:4(6Z,9Z,12Z,15Z)/16:0);PC(18:3(6Z,9Z,1…	6.82798848445146;6.82798848445146;6.82798848445146;6.82798848445146;6.82798848445146;6.82798848445146;6.82798848445146;6.82798848445146;6.82798848445146;6.82798848445146;6.82798848445146;6.82798848445146;6.82798848445146;6.82798848445146;6.82798848445146;6.82798848445146;	MS1 mz matched	754.536	39.6535
3717	positive	NA	NA	PC(18:3(9Z,12Z,15Z)/16:1(9Z));PE(15:0/22:4(7Z,10Z,13Z,16Z));PC(20:4(5Z,8Z,11Z,14Z)/14:0);PC(16:1(9Z)/18:3(6Z,9Z,12Z));PC(14:0/20:4(5Z,8Z,11Z,14Z));PC(14:0/20:4(8Z,11Z,14Z,17Z));PC(16:0/18:4(6Z,9Z,12Z,15Z));PC(20:4(8Z,11Z,14Z,17Z)/14:0);PC(20:3(8Z,11Z,14Z)/14:1(9Z));PC(14:1(9Z)/20:3(5Z,8Z,11Z));PC(16:1(9Z)/18:3(9Z,12Z,15Z));PC(14:1(9Z)/20:3(8Z,11Z,14Z));PC(18:4(6Z,9Z,12Z,15Z)/16:0);PC(18:3(6Z,9Z,1…	6.87685679262053;6.87685679262053;6.87685679262053;6.87685679262053;6.87685679262053;6.87685679262053;6.87685679262053;6.87685679262053;6.87685679262053;6.87685679262053;6.87685679262053;6.87685679262053;6.87685679262053;6.87685679262053;6.87685679262053;6.87685679262053;	MS1 mz matched	754.536	143.32
3725	positive	NA	NA	NA	NA	Unmapped	756.172	143.927
3729	positive	PC(16:0/16:0)	0.9982	NA	NA	MS2 forward	756.553	39.9025
3731	positive	NA	NA	NA	NA	Unmapped	756.833	351.214
3738	positive	NA	NA	NA	NA	Unmapped	757.62	172.41
3745	positive	NA	NA	PC(20:1(11Z)/14:1(9Z));PC(20:2(11Z,14Z)/14:0);PE-NMe(18:1(9Z)/18:1(9Z));PC(18:1(11Z)/16:1(9Z));PE(15:0/22:2(13Z,16Z));PC(16:1(9Z)/18:1(11Z));PC(18:2(9Z,12Z)/16:0);PE(22:2(13Z,16Z)/15:0);PC(18:1(9Z)/16:1(9Z));PC(16:0/18:2(9Z,12Z));PC(16:1(9Z)/18:1(9Z));PC(14:1(9Z)/20:1(11Z));PC(14:0/20:2(11Z,14Z));	-0.204735676122282;-0.204735676122282;-0.204735676122282;-0.204735676122282;-0.204735676122282;-0.204735676122282;-0.204735676122282;-0.204735676122282;-0.204735676122282;-0.204735676122282;-0.204735676122282;-0.204735676122282;-0.204735676122282;	MS1 mz matched	758.568	143.928
3746	positive	NA	NA	PC(20:1(11Z)/14:1(9Z));PC(20:2(11Z,14Z)/14:0);PE-NMe(18:1(9Z)/18:1(9Z));PC(18:1(11Z)/16:1(9Z));PE(15:0/22:2(13Z,16Z));PC(16:1(9Z)/18:1(11Z));PC(18:2(9Z,12Z)/16:0);PE(22:2(13Z,16Z)/15:0);PC(18:1(9Z)/16:1(9Z));PC(16:0/18:2(9Z,12Z));PC(16:1(9Z)/18:1(9Z));PC(14:1(9Z)/20:1(11Z));PC(14:0/20:2(11Z,14Z));	8.16738906416214;8.16738906416214;8.16738906416214;8.16738906416214;8.16738906416214;8.16738906416214;8.16738906416214;8.16738906416214;8.16738906416214;8.16738906416214;8.16738906416214;8.16738906416214;8.16738906416214;	MS1 mz matched	758.568	39.797
3751	positive	NA	NA	NA	NA	Unmapped	758.813	350.766
3762	positive	NA	NA	PC(16:0/18:1(9Z));PC(14:0/20:1(11Z));PC(20:0/14:1(9Z));PE(22:1(13Z)/15:0);PC(18:1(9Z)/16:0);PC(20:1(11Z)/14:0);PC(18:0/16:1(9Z));PC(18:1(11Z)/16:0);PC(14:1(9Z)/20:0);PC(16:0/18:1(11Z));PC(16:1(9Z)/18:0);PE(15:0/22:1(13Z));	5.90205379216061;5.90205379216061;5.90205379216061;5.90205379216061;5.90205379216061;5.90205379216061;5.90205379216061;5.90205379216061;5.90205379216061;5.90205379216061;5.90205379216061;5.90205379216061;	MS1 mz matched	760.582	58.749
3785	positive	NA	NA	NA	NA	Unmapped	762.877	352.312
3794	positive	NA	NA	PE(20:3(5Z,8Z,11Z)/18:3(6Z,9Z,12Z));PE(20:3(8Z,11Z,14Z)/18:3(6Z,9Z,12Z));PE(22:5(7Z,10Z,13Z,16Z,19Z)/16:1(9Z));PE(22:6(4Z,7Z,10Z,13Z,16Z,19Z)/16:0);PE(20:5(5Z,8Z,11Z,14Z,17Z)/18:1(11Z));PE(16:1(9Z)/22:5(4Z,7Z,10Z,13Z,16Z));PE(20:5(5Z,8Z,11Z,14Z,17Z)/18:1(9Z));PE(18:1(11Z)/20:5(5Z,8Z,11Z,14Z,17Z));PE(20:4(5Z,8Z,11Z,14Z)/18:2(9Z,12Z));PE(18:1(9Z)/20:5(5Z,8Z,11Z,14Z,17Z));PE(18:3(6Z,9Z,12Z)/20:3(5Z,…	7.19001526861005;7.19001526861005;7.19001526861005;7.19001526861005;7.19001526861005;7.19001526861005;7.19001526861005;7.19001526861005;7.19001526861005;7.19001526861005;7.19001526861005;7.19001526861005;7.19001526861005;7.19001526861005;7.19001526861005;7.19001526861005;7.19001526861005;7.19001526861005;7.19001526861005;7.19001526861005;7.19001526861005;7.19001526861005;7.19001526861005;7.190015…	MS1 mz matched	764.521	143.293
3805	positive	NA	NA	PC(o-16:1(9Z)/20:4(8Z,11Z,14Z,17Z));PC(P-16:0/20:4(5Z,8Z,11Z,14Z));PC(P-18:1(9Z)/18:3(9Z,12Z,15Z));PC(P-18:1(11Z)/18:3(6Z,9Z,12Z));PC(P-18:1(11Z)/18:3(9Z,12Z,15Z));2-O-(5,8,11,14,17-Eicosapentaenoyl)-1-O-hexadecylglycero-3-phosphocholine;PC(18:4(6Z,9Z,12Z,15Z)/dm18:0);PC(P-18:1(9Z)/18:3(6Z,9Z,12Z));PC(P-16:0/20:4(8Z,11Z,14Z,17Z));PC(18:3(6Z,9Z,12Z)/P-18:1(11Z));PC(20:4(8Z,11Z,14Z,17Z)/P-16:0);PC(…	7.85922963195509;7.85922963195509;7.85922963195509;7.85922963195509;7.85922963195509;7.85922963195509;7.85922963195509;7.85922963195509;7.85922963195509;7.85922963195509;7.85922963195509;7.85922963195509;7.85922963195509;7.85922963195509;7.85922963195509;7.85922963195509;	MS1 mz matched	766.573	137.303
3816	positive	PC(18:1(9Z)/18:1(9Z))	0.9977	NA	NA	MS2 forward	768.588	139.222
3835	positive	NA	NA	PE(18:0/20:2(11Z,14Z));PE(14:1(9Z)/24:1(15Z));PE(18:1(11Z)/20:1(11Z));PE(20:1(11Z)/18:1(11Z));PE(24:1(15Z)/14:1(9Z));PE(16:1(9Z)/22:1(13Z));PE(18:1(9Z)/20:1(11Z));PE(20:1(11Z)/18:1(9Z));PE(16:0/22:2(13Z,16Z));PE(22:2(13Z,16Z)/16:0);PE(18:2(9Z,12Z)/20:0);PE(22:1(13Z)/16:1(9Z));PC(20:2(11Z,14Z)/15:0);PC(15:0/20:2(11Z,14Z));PE(20:0/18:2(9Z,12Z));PE-NMe2(18:1(9Z)/18:1(9Z));PE(20:2(11Z,14Z)/18:0);	7.59677159224255;7.59677159224255;7.59677159224255;7.59677159224255;7.59677159224255;7.59677159224255;7.59677159224255;7.59677159224255;7.59677159224255;7.59677159224255;7.59677159224255;7.59677159224255;7.59677159224255;7.59677159224255;7.59677159224255;7.59677159224255;7.59677159224255;	MS1 mz matched	772.584	142.755
3837	positive	NA	NA	Guanosine triphosphate adenosine;	-14.0517100260928;	MS1 mz matched	773.076	292.313
3838	positive	NA	NA	NA	NA	Unmapped	773.353	30.404
3846	positive	NA	NA	NA	NA	Unmapped	774.563	155.014
3853	positive	Sphingomyelin (d18:1/18:0)	1	NA	NA	MS2 reverse	775.566	155.04
3861	positive	NA	NA	NA	NA	Unmapped	776.612	321.066
3862	positive	NA	NA	NA	NA	Unmapped	776.839	351.878
3869	positive	NA	NA	NA	NA	Unmapped	778.229	31.511
3881	positive	NA	NA	1,28-Octacosanediol diferulate;	-2.05458416446467;	MS1 mz matched	780.095	140.282
3882	positive	NA	NA	1,28-Octacosanediol diferulate;	-2.45708738231083;	MS1 mz matched	780.095	40.0675
3886	positive	NA	NA	PC(18:2(9Z,12Z)/18:3(9Z,12Z,15Z));PC(20:4(8Z,11Z,14Z,17Z)/16:1(9Z));PC(22:5(7Z,10Z,13Z,16Z,19Z)/14:0);PC(16:0/20:5(5Z,8Z,11Z,14Z,17Z));PC(18:1(11Z)/18:4(6Z,9Z,12Z,15Z));PC(18:4(6Z,9Z,12Z,15Z)/18:1(9Z));PC(14:0/22:5(7Z,10Z,13Z,16Z,19Z));PC(22:5(4Z,7Z,10Z,13Z,16Z)/14:0);PC(18:3(6Z,9Z,12Z)/18:2(9Z,12Z));PC(18:4(6Z,9Z,12Z,15Z)/18:1(11Z));PC(18:1(9Z)/18:4(6Z,9Z,12Z,15Z));PC(16:1(9Z)/20:4(8Z,11Z,14Z,17…	-1.93060964344339;-1.93060964344339;-1.93060964344339;-1.93060964344339;-1.93060964344339;-1.93060964344339;-1.93060964344339;-1.93060964344339;-1.93060964344339;-1.93060964344339;-1.93060964344339;-1.93060964344339;-1.93060964344339;-1.93060964344339;-1.	MS1 mz matched	780.552	141.511
3887	positive	NA	NA	PC(18:2(9Z,12Z)/18:3(9Z,12Z,15Z));PC(20:4(8Z,11Z,14Z,17Z)/16:1(9Z));PC(22:5(7Z,10Z,13Z,16Z,19Z)/14:0);PC(16:0/20:5(5Z,8Z,11Z,14Z,17Z));PC(18:1(11Z)/18:4(6Z,9Z,12Z,15Z));PC(18:4(6Z,9Z,12Z,15Z)/18:1(9Z));PC(14:0/22:5(7Z,10Z,13Z,16Z,19Z));PC(22:5(4Z,7Z,10Z,13Z,16Z)/14:0);PC(18:3(6Z,9Z,12Z)/18:2(9Z,12Z));PC(18:4(6Z,9Z,12Z,15Z)/18:1(11Z));PC(18:1(9Z)/18:4(6Z,9Z,12Z,15Z));PC(16:1(9Z)/20:4(8Z,11Z,14Z,17…	6.95651171052023;6.95651171052023;6.95651171052023;6.95651171052023;6.95651171052023;6.95651171052023;6.95651171052023;6.95651171052023;6.95651171052023;6.95651171052023;6.95651171052023;6.95651171052023;6.95651171052023;6.95651171052023;6.95651171052023;6.95651171052023;6.95651171052023;6.95651171052023;6.95651171052023;6.95651171052023;	MS1 mz matched	780.552	39.669
3892	positive	NA	NA	NA	NA	Unmapped	780.914	352.437
3902	positive	NA	NA	PC(18:1(11Z)/18:3(9Z,12Z,15Z));PC(18:0/18:4(6Z,9Z,12Z,15Z));PC(20:4(5Z,8Z,11Z,14Z)/16:0);PC(18:3(9Z,12Z,15Z)/18:1(11Z));PC(18:2(9Z,12Z)/18:2(9Z,12Z));PC(16:1(9Z)/20:3(5Z,8Z,11Z));PC(18:3(9Z,12Z,15Z)/18:1(9Z));PC(16:0/20:4(5Z,8Z,11Z,14Z));PC(18:4(6Z,9Z,12Z,15Z)/18:0);PC(20:3(5Z,8Z,11Z)/16:1(9Z));PC(16:1(9Z)/20:3(8Z,11Z,14Z));PC(20:4(8Z,11Z,14Z,17Z)/16:0);PC(16:0/20:4(8Z,11Z,14Z,17Z));PC(18:3(6Z,9Z…	-1.47793747748394;-1.47793747748394;-1.47793747748394;-1.47793747748394;-1.47793747748394;-1.47793747748394;-1.47793747748394;-1.47793747748394;-1.47793747748394;-1.47793747748394;-1.47793747748394;-1.47793747748394;-1.47793747748394;-1.47793747748394;-1.	MS1 mz matched	782.568	140.262
3903	positive	NA	NA	PC(18:1(11Z)/18:3(9Z,12Z,15Z));PC(18:0/18:4(6Z,9Z,12Z,15Z));PC(20:4(5Z,8Z,11Z,14Z)/16:0);PC(18:3(9Z,12Z,15Z)/18:1(11Z));PC(18:2(9Z,12Z)/18:2(9Z,12Z));PC(16:1(9Z)/20:3(5Z,8Z,11Z));PC(18:3(9Z,12Z,15Z)/18:1(9Z));PC(16:0/20:4(5Z,8Z,11Z,14Z));PC(18:4(6Z,9Z,12Z,15Z)/18:0);PC(20:3(5Z,8Z,11Z)/16:1(9Z));PC(16:1(9Z)/20:3(8Z,11Z,14Z));PC(20:4(8Z,11Z,14Z,17Z)/16:0);PC(16:0/20:4(8Z,11Z,14Z,17Z));PC(18:3(6Z,9Z…	-0.198448708163469;-0.198448708163469;-0.198448708163469;-0.198448708163469;-0.198448708163469;-0.198448708163469;-0.198448708163469;-0.198448708163469;-0.198448708163469;-0.198448708163469;-0.198448708163469;-0.198448708163469;-0.198448708163469;-0.19844	MS1 mz matched	782.568	39.657
3918	positive	NA	NA	PC(P-18:0/16:0);PC(o-18:1(9Z)/16:0);PC(18:0/P-16:0);PC(16:0/P-18:0);PC(o-18:1(11Z)/16:0);PC(o-16:1(9Z)/18:0);PC(P-16:0/18:0);	14.0281926942104;14.0281926942104;14.0281926942104;14.0281926942104;14.0281926942104;14.0281926942104;14.0281926942104;	MS1 mz matched	784.582	115.595
3922	positive	NA	NA	NA	NA	Unmapped	784.977	352.452
3928	positive	NA	NA	Degalloyltheaflavonin;	22.5584809501157;	MS1 mz matched	785.651	171.099
3958	positive	NA	NA	NA	NA	Unmapped	788.935	352.441
3967	positive	NA	NA	PC(18:1(11Z)/20:4(8Z,11Z,14Z,17Z));PC(18:1(9Z)/20:4(8Z,11Z,14Z,17Z));PC(18:4(6Z,9Z,12Z,15Z)/20:1(11Z));PC(22:5(7Z,10Z,13Z,16Z,19Z)/16:0);PC(20:3(5Z,8Z,11Z)/18:2(9Z,12Z));PC(20:4(8Z,11Z,14Z,17Z)/18:1(9Z));PC(20:1(11Z)/18:4(6Z,9Z,12Z,15Z));PC(18:2(9Z,12Z)/20:3(8Z,11Z,14Z));PC(20:3(8Z,11Z,14Z)/18:2(9Z,12Z));PC(20:2(11Z,14Z)/18:3(6Z,9Z,12Z));PC(18:2(9Z,12Z)/20:3(5Z,8Z,11Z));PC(22:5(4Z,7Z,10Z,13Z,16Z)…	1.47960975701304;1.47960975701304;1.47960975701304;1.47960975701304;1.47960975701304;1.47960975701304;1.47960975701304;1.47960975701304;1.47960975701304;1.47960975701304;1.47960975701304;1.47960975701304;1.47960975701304;1.47960975701304;1.47960975701304;1.47960975701304;1.47960975701304;1.47960975701304;1.47960975701304;1.47960975701304;1.47960975701304;1.47960975701304;1.47960975701304;1.479609…	MS1 mz matched	790.573	136.659
3977	positive	NA	NA	NA	NA	Unmapped	791.898	352.439
3979	positive	NA	NA	NA	NA	Unmapped	792.401	352.445
3981	positive	NA	NA	PC(dm18:1(11Z)/20:4(8Z,11Z,14Z,17Z));PC(P-18:1(11Z)/20:4(5Z,8Z,11Z,14Z));PC(20:4(5Z,8Z,11Z,14Z)/P-18:1(9Z));PC(22:5(7Z,10Z,13Z,16Z,19Z)/P-16:0);PC(20:5(5Z,8Z,11Z,14Z,17Z)/P-18:0);PC(P-18:1(9Z)/20:4(8Z,11Z,14Z,17Z));PC(P-18:1(9Z)/20:4(5Z,8Z,11Z,14Z));PC(20:4(8Z,11Z,14Z,17Z)/P-18:1(11Z));PC(o-16:0/22:6(4Z,7Z,10Z,13Z,16Z,19Z));PC(P-18:0/20:5(5Z,8Z,11Z,14Z,17Z));PC(P-16:0/22:5(4Z,7Z,10Z,13Z,16Z));PC(…	6.69949257456002;6.69949257456002;6.69949257456002;6.69949257456002;6.69949257456002;6.69949257456002;6.69949257456002;6.69949257456002;6.69949257456002;6.69949257456002;6.69949257456002;6.69949257456002;6.69949257456002;6.69949257456002;6.69949257456002;6.69949257456002;	MS1 mz matched	792.588	39.649
3999	positive	NA	NA	NA	NA	Unmapped	796.34	240.067
4012	positive	NA	NA	NA	NA	Unmapped	798.561	151.758
4036	positive	NA	NA	NA	NA	Unmapped	804.02	139.073
4037	positive	NA	NA	NA	NA	Unmapped	804.019	39.962
4039	positive	NA	NA	PC(18:1(11Z)/18:3(9Z,12Z,15Z));PC(18:0/18:4(6Z,9Z,12Z,15Z));PC(20:4(5Z,8Z,11Z,14Z)/16:0);PC(18:3(9Z,12Z,15Z)/18:1(11Z));PC(18:2(9Z,12Z)/18:2(9Z,12Z));PC(16:1(9Z)/20:3(5Z,8Z,11Z));PC(18:3(9Z,12Z,15Z)/18:1(9Z));PC(16:0/20:4(5Z,8Z,11Z,14Z));PC(18:4(6Z,9Z,12Z,15Z)/18:0);PC(20:3(5Z,8Z,11Z)/16:1(9Z));PC(16:1(9Z)/20:3(8Z,11Z,14Z));PC(20:4(8Z,11Z,14Z,17Z)/16:0);PC(16:0/20:4(8Z,11Z,14Z,17Z));PC(18:3(6Z,9Z…	-1.47793747748394;-1.47793747748394;-1.47793747748394;-1.47793747748394;-1.47793747748394;-1.47793747748394;-1.47793747748394;-1.47793747748394;-1.47793747748394;-1.47793747748394;-1.47793747748394;-1.47793747748394;-1.47793747748394;-1.47793747748394;-1.	MS1 mz matched	804.551	139.72
4040	positive	NA	NA	PC(18:1(11Z)/18:3(9Z,12Z,15Z));PC(18:0/18:4(6Z,9Z,12Z,15Z));PC(20:4(5Z,8Z,11Z,14Z)/16:0);PC(18:3(9Z,12Z,15Z)/18:1(11Z));PC(18:2(9Z,12Z)/18:2(9Z,12Z));PC(16:1(9Z)/20:3(5Z,8Z,11Z));PC(18:3(9Z,12Z,15Z)/18:1(9Z));PC(16:0/20:4(5Z,8Z,11Z,14Z));PC(18:4(6Z,9Z,12Z,15Z)/18:0);PC(20:3(5Z,8Z,11Z)/16:1(9Z));PC(16:1(9Z)/20:3(8Z,11Z,14Z));PC(20:4(8Z,11Z,14Z,17Z)/16:0);PC(16:0/20:4(8Z,11Z,14Z,17Z));PC(18:3(6Z,9Z…	-0.198448708163469;-0.198448708163469;-0.198448708163469;-0.198448708163469;-0.198448708163469;-0.198448708163469;-0.198448708163469;-0.198448708163469;-0.198448708163469;-0.198448708163469;-0.198448708163469;-0.198448708163469;-0.198448708163469;-0.19844	MS1 mz matched	804.55	39.767
4056	positive	NA	NA	PC(16:1(9Z)/22:5(4Z,7Z,10Z,13Z,16Z));PC(18:3(6Z,9Z,12Z)/20:3(5Z,8Z,11Z));PC(16:1(9Z)/22:5(7Z,10Z,13Z,16Z,19Z));PC(20:4(5Z,8Z,11Z,14Z)/18:2(9Z,12Z));PC(18:2(9Z,12Z)/20:4(8Z,11Z,14Z,17Z));PC(20:3(8Z,11Z,14Z)/18:3(6Z,9Z,12Z));PC(18:1(11Z)/20:5(5Z,8Z,11Z,14Z,17Z));PC(20:5(5Z,8Z,11Z,14Z,17Z)/18:1(11Z));PC(20:3(5Z,8Z,11Z)/18:3(9Z,12Z,15Z));PC(22:6(4Z,7Z,10Z,13Z,16Z,19Z)/16:0);PC(18:2(9Z,12Z)/20:4(5Z,8Z…	-1.43390549406087;-1.43390549406087;-1.43390549406087;-1.43390549406087;-1.43390549406087;-1.43390549406087;-1.43390549406087;-1.43390549406087;-1.43390549406087;-1.43390549406087;-1.43390549406087;-1.43390549406087;-1.43390549406087;-1.43390549406087;-1.	MS1 mz matched	806.569	139.085
4057	positive	NA	NA	PC(14:1(9Z)/22:2(13Z,16Z));PC(16:0/20:3(8Z,11Z,14Z));PC(20:3(5Z,8Z,11Z)/16:0);PC(18:3(9Z,12Z,15Z)/18:0);PC(18:2(9Z,12Z)/18:1(9Z));PC(20:3(8Z,11Z,14Z)/16:0);PC(18:0/18:3(9Z,12Z,15Z));PC(16:0/20:3(5Z,8Z,11Z));PC(18:3(6Z,9Z,12Z)/18:0);PC(22:2(13Z,16Z)/14:1(9Z));PC(20:2(11Z,14Z)/16:1(9Z));PC(18:2(9Z,12Z)/18:1(11Z));PC(18:1(9Z)/18:2(9Z,12Z));PC(18:1(11Z)/18:2(9Z,12Z));PC(16:1(9Z)/20:2(11Z,14Z));PC(18:…	9.1821130629656;9.1821130629656;9.1821130629656;9.1821130629656;9.1821130629656;9.1821130629656;9.1821130629656;9.1821130629656;9.1821130629656;9.1821130629656;9.1821130629656;9.1821130629656;9.1821130629656;9.1821130629656;9.1821130629656;9.1821130629656;	MS1 mz matched	806.569	39.6535
4069	positive	NA	NA	NA	NA	Unmapped	808.938	352.443
4072	positive	NA	NA	Licoricesaponin B2;	20.3835974340445;	MS1 mz matched	809.441	352.447
4076	positive	SM(d18:1/22:0)	0.9961	NA	NA	MS2 forward	809.651	169.989
4080	positive	1-Stearoyl-2-oleoyl-sn-glycerol 3-phosphocholine (SOPC)	0.9996	NA	NA	MS2 forward	810.6	138.519
4091	positive	NA	NA	TG(14:1(9Z)/15:0/20:4(8Z,11Z,14Z,17Z));TG(14:0/20:5(5Z,8Z,11Z,14Z,17Z)/15:0);TG(16:1(9Z)/15:0/18:4(6Z,9Z,12Z,15Z));TG(15:0/20:4(8Z,11Z,14Z,17Z)/14:1(9Z));TG(15:0/14:1(9Z)/20:4(8Z,11Z,14Z,17Z));TG(15:0/16:1(9Z)/18:4(6Z,9Z,12Z,15Z));TG(15:0/20:4(5Z,8Z,11Z,14Z)/14:1(9Z));TG(14:1(9Z)/15:0/20:4(5Z,8Z,11Z,14Z));TG(14:0/15:0/20:5(5Z,8Z,11Z,14Z,17Z));TG(15:0/18:4(6Z,9Z,12Z,15Z)/16:1(9Z));TG(15:0/14:0/20:…	-8.40817987502307;-8.40817987502307;-8.40817987502307;-8.40817987502307;-8.40817987502307;-8.40817987502307;-8.40817987502307;-8.40817987502307;-8.40817987502307;-8.40817987502307;-8.40817987502307;-8.40817987502307;	MS1 mz matched	811.667	169.946
4092	positive	NA	NA	TG(14:1(9Z)/15:0/20:4(8Z,11Z,14Z,17Z));TG(14:0/20:5(5Z,8Z,11Z,14Z,17Z)/15:0);TG(16:1(9Z)/15:0/18:4(6Z,9Z,12Z,15Z));TG(15:0/20:4(8Z,11Z,14Z,17Z)/14:1(9Z));TG(15:0/14:1(9Z)/20:4(8Z,11Z,14Z,17Z));TG(15:0/16:1(9Z)/18:4(6Z,9Z,12Z,15Z));TG(15:0/20:4(5Z,8Z,11Z,14Z)/14:1(9Z));TG(14:1(9Z)/15:0/20:4(5Z,8Z,11Z,14Z));TG(14:0/15:0/20:5(5Z,8Z,11Z,14Z,17Z));TG(15:0/18:4(6Z,9Z,12Z,15Z)/16:1(9Z));TG(15:0/14:0/20:…	-8.3607267332107;-8.3607267332107;-8.3607267332107;-8.3607267332107;-8.3607267332107;-8.3607267332107;-8.3607267332107;-8.3607267332107;-8.3607267332107;-8.3607267332107;-8.3607267332107;-8.3607267332107;	MS1 mz matched	811.667	41.8245
4093	positive	NA	NA	NA	NA	Unmapped	811.797	350.224
4097	positive	NA	NA	NA	NA	Unmapped	812.611	139.151
4102	positive	NA	NA	NA	NA	Unmapped	812.897	352.447
4125	positive	NA	NA	PC(14:0/20:3(8Z,11Z,14Z));PC(14:0/20:3(5Z,8Z,11Z));PC(16:1(9Z)/18:2(9Z,12Z));PC(18:3(9Z,12Z,15Z)/16:0);PC(18:3(6Z,9Z,12Z)/16:0);PC(18:2(9Z,12Z)/16:1(9Z));PC(20:3(8Z,11Z,14Z)/14:0);PC(20:3(5Z,8Z,11Z)/14:0);PC(14:1(9Z)/20:2(11Z,14Z));PC(20:2(11Z,14Z)/14:1(9Z));PC(16:0/18:3(9Z,12Z,15Z));PC(16:0/18:3(6Z,9Z,12Z));	8.59642650318739;8.59642650318739;8.59642650318739;8.59642650318739;8.59642650318739;8.59642650318739;8.59642650318739;8.59642650318739;8.59642650318739;8.59642650318739;8.59642650318739;8.59642650318739;	MS1 mz matched	816.584	39.635
4126	positive	NA	NA	PC(22:6(4Z,7Z,10Z,13Z,16Z,19Z)/P-18:1(9Z));PC(P-18:1(11Z)/22:6(4Z,7Z,10Z,13Z,16Z,19Z));PC(22:6(4Z,7Z,10Z,13Z,16Z,19Z)/P-18:1(11Z));PC(P-18:1(9Z)/22:6(4Z,7Z,10Z,13Z,16Z,19Z));	6.19007421056121;6.19007421056121;6.19007421056121;6.19007421056121;	MS1 mz matched	816.588	136.071
4134	positive	NA	NA	NA	NA	Unmapped	818.41	37.3925
4136	positive	NA	NA	PC(22:5(7Z,10Z,13Z,16Z,19Z)/P-18:1(11Z));PC(P-18:1(11Z)/22:5(4Z,7Z,10Z,13Z,16Z));PC(P-18:1(11Z)/22:5(7Z,10Z,13Z,16Z,19Z));PC(P-18:1(9Z)/22:5(7Z,10Z,13Z,16Z,19Z));PC(22:5(4Z,7Z,10Z,13Z,16Z)/P-18:1(11Z));PC(P-18:0/22:6(4Z,7Z,10Z,13Z,16Z,19Z));PC(22:5(4Z,7Z,10Z,13Z,16Z)/P-18:1(9Z));PC(P-18:1(9Z)/22:5(4Z,7Z,10Z,13Z,16Z));PC(22:5(7Z,10Z,13Z,16Z,19Z)/P-18:1(9Z));PC(22:6(4Z,7Z,10Z,13Z,16Z,19Z)/P-18:0);	10.3466427346904;10.3466427346904;10.3466427346904;10.3466427346904;10.3466427346904;10.3466427346904;10.3466427346904;10.3466427346904;10.3466427346904;10.3466427346904;	MS1 mz matched	818.605	136.709
4137	positive	NA	NA	PG(18:1(9Z)/18:0);PG(18:0/18:1(11Z));PG(18:0/18:1(9Z));PG(18:1(11Z)/18:0);	15.7936947069398;15.7936947069398;15.7936947069398;15.7936947069398;	MS1 mz matched	818.604	39.649
4139	positive	NA	NA	PE(20:2(11Z,14Z)/22:5(7Z,10Z,13Z,16Z,19Z));PE(22:5(4Z,7Z,10Z,13Z,16Z)/20:2(11Z,14Z));PE(20:5(5Z,8Z,11Z,14Z,17Z)/22:2(13Z,16Z));PE(22:4(7Z,10Z,13Z,16Z)/20:3(5Z,8Z,11Z));PE(22:5(7Z,10Z,13Z,16Z,19Z)/20:2(11Z,14Z));PE(20:3(5Z,8Z,11Z)/22:4(7Z,10Z,13Z,16Z));PE(20:2(11Z,14Z)/22:5(4Z,7Z,10Z,13Z,16Z));PE(22:6(4Z,7Z,10Z,13Z,16Z,19Z)/20:1(11Z));PE(20:1(11Z)/22:6(4Z,7Z,10Z,13Z,16Z,19Z));PE(22:4(7Z,10Z,13Z,16…	7.57840779612236;7.57840779612236;7.57840779612236;7.57840779612236;7.57840779612236;7.57840779612236;7.57840779612236;7.57840779612236;7.57840779612236;7.57840779612236;7.57840779612236;7.57840779612236;	MS1 mz matched	819.134	235.883
4145	positive	NA	NA	TG(16:0/15:0/18:1(9Z));TG(15:0/16:1(9Z)/18:0);TG(15:0/16:0/18:1(11Z));TG(16:0/15:0/18:1(11Z));TG(20:0/15:0/14:1(9Z));TG(18:0/15:0/16:1(9Z));TG(15:0/18:0/16:1(9Z));TG(15:0/20:1(11Z)/14:0)[iso6];TG(15:0/18:1(11Z)/16:0);TG(14:0/15:0/20:1(11Z));TG(15:0/18:1(9Z)/16:0)[iso6];TG(15:0/14:0/20:1(11Z));TG(14:0/20:1(11Z)/15:0);TG(15:0/14:1(9Z)/20:0);TG(15:0/16:0/18:1(9Z));TG(15:0/20:0/14:1(9Z))[iso6];	13.0708524723688;13.0708524723688;13.0708524723688;13.0708524723688;13.0708524723688;13.0708524723688;13.0708524723688;13.0708524723688;13.0708524723688;13.0708524723688;13.0708524723688;13.0708524723688;13.0708524723688;13.0708524723688;13.0708524723688;13.0708524723688;	MS1 mz matched	820.342	236.67
4159	positive	NA	NA	NA	NA	Unmapped	821.917	352.445
4162	positive	NA	NA	PS(20:4(5Z,8Z,11Z,14Z)/14:0);PS(14:0/20:4(5Z,8Z,11Z,14Z));PS(14:1(9Z)/20:3(8Z,11Z,14Z));PS(20:3(8Z,11Z,14Z)/14:1(9Z));PS(16:1(9Z)/18:3(9Z,12Z,15Z));PS(18:3(9Z,12Z,15Z)/16:1(9Z));	-19.5029943954206;-19.5029943954206;-19.5029943954206;-19.5029943954206;-19.5029943954206;-19.5029943954206;	MS1 mz matched	822.415	352.459
4170	positive	NA	NA	Periandrin I;Glycyrrhizin;Licoricesaponin K2;Uralsaponin B;Glycyrrhizite;Glycyrrhizin;Glycyrrhizic acid;(3beta,20beta)-20-Carboxy-11-oxo-30-norolean-12-en-3-yl 2-O-beta-D-glucuronosyl-beta-D-glucosiduronic acid	-2.17156101489066;-2.17156101489066;-2.17156101489066;-2.17156101489066;-2.18870584012733	MS1 mz matched	823.41	367.872
4192	positive	NA	NA	PC(16:1(9Z)/22:5(4Z,7Z,10Z,13Z,16Z));PC(18:3(6Z,9Z,12Z)/20:3(5Z,8Z,11Z));PC(16:1(9Z)/22:5(7Z,10Z,13Z,16Z,19Z));PC(20:4(5Z,8Z,11Z,14Z)/18:2(9Z,12Z));PC(18:2(9Z,12Z)/20:4(8Z,11Z,14Z,17Z));PC(20:3(8Z,11Z,14Z)/18:3(6Z,9Z,12Z));PC(18:1(11Z)/20:5(5Z,8Z,11Z,14Z,17Z));PC(20:5(5Z,8Z,11Z,14Z,17Z)/18:1(11Z));PC(20:3(5Z,8Z,11Z)/18:3(9Z,12Z,15Z));PC(22:6(4Z,7Z,10Z,13Z,16Z,19Z)/16:0);PC(18:2(9Z,12Z)/20:4(5Z,8Z…	-1.43390549406087;-1.43390549406087;-1.43390549406087;-1.43390549406087;-1.43390549406087;-1.43390549406087;-1.43390549406087;-1.43390549406087;-1.43390549406087;-1.43390549406087;-1.43390549406087;-1.43390549406087;-1.43390549406087;-1.43390549406087;-1.	MS1 mz matched	828.55	138.991
4210	positive	NA	NA	NA	NA	Unmapped	832.9	352.44
4211	positive	NA	NA	NA	NA	Unmapped	833.402	352.447
4217	positive	NA	NA	PC(20:3(5Z,8Z,11Z)/20:3(5Z,8Z,11Z));PC(18:1(9Z)/22:5(4Z,7Z,10Z,13Z,16Z));PC(20:3(8Z,11Z,14Z)/20:3(5Z,8Z,11Z));PC(18:2(9Z,12Z)/22:4(7Z,10Z,13Z,16Z));PC(20:4(5Z,8Z,11Z,14Z)/20:2(11Z,14Z));PC(22:5(7Z,10Z,13Z,16Z,19Z)/18:1(9Z));PC(18:4(6Z,9Z,12Z,15Z)/22:2(13Z,16Z));PC(18:1(11Z)/22:5(4Z,7Z,10Z,13Z,16Z));PC(20:3(8Z,11Z,14Z)/20:3(8Z,11Z,14Z));PC(22:4(7Z,10Z,13Z,16Z)/18:2(9Z,12Z));PC(22:5(7Z,10Z,13Z,16Z,…	-1.74569508785345;-1.74569508785345;-1.74569508785345;-1.74569508785345;-1.74569508785345;-1.74569508785345;-1.74569508785345;-1.74569508785345;-1.74569508785345;-1.74569508785345;-1.74569508785345;-1.74569508785345;-1.74569508785345;-1.74569508785345;-1.	MS1 mz matched	834.6	137.459
4218	positive	NA	NA	PC(20:3(5Z,8Z,11Z)/20:3(5Z,8Z,11Z));PC(18:1(9Z)/22:5(4Z,7Z,10Z,13Z,16Z));PC(20:3(8Z,11Z,14Z)/20:3(5Z,8Z,11Z));PC(18:2(9Z,12Z)/22:4(7Z,10Z,13Z,16Z));PC(20:4(5Z,8Z,11Z,14Z)/20:2(11Z,14Z));PC(22:5(7Z,10Z,13Z,16Z,19Z)/18:1(9Z));PC(18:4(6Z,9Z,12Z,15Z)/22:2(13Z,16Z));PC(18:1(11Z)/22:5(4Z,7Z,10Z,13Z,16Z));PC(20:3(8Z,11Z,14Z)/20:3(8Z,11Z,14Z));PC(22:4(7Z,10Z,13Z,16Z)/18:2(9Z,12Z));PC(22:5(7Z,10Z,13Z,16Z,…	7.29138754399915;7.29138754399915;7.29138754399915;7.29138754399915;7.29138754399915;7.29138754399915;7.29138754399915;7.29138754399915;7.29138754399915;7.29138754399915;7.29138754399915;7.29138754399915;7.29138754399915;7.29138754399915;7.29138754399915;7.29138754399915;7.29138754399915;7.29138754399915;7.29138754399915;7.29138754399915;7.29138754399915;7.29138754399915;7.29138754399915;7.291387…	MS1 mz matched	834.6	39.6505
4220	positive	NA	NA	NA	NA	Unmapped	835.112	236.052
4228	positive	NA	NA	NA	NA	Unmapped	836.858	352.417
4259	positive	NA	NA	NA	NA	Unmapped	841.439	368.167
4283	positive	NA	NA	NA	NA	Unmapped	846.441	36.5445
4308	positive	NA	NA	NA	NA	Unmapped	852.248	31.239
4315	positive	NA	NA	NA	NA	Unmapped	854.21	33.599
4327	positive	NA	NA	PC(20:3(5Z,8Z,11Z)/20:3(5Z,8Z,11Z));PC(18:1(9Z)/22:5(4Z,7Z,10Z,13Z,16Z));PC(20:3(8Z,11Z,14Z)/20:3(5Z,8Z,11Z));PC(18:2(9Z,12Z)/22:4(7Z,10Z,13Z,16Z));PC(20:4(5Z,8Z,11Z,14Z)/20:2(11Z,14Z));PC(22:5(7Z,10Z,13Z,16Z,19Z)/18:1(9Z));PC(18:4(6Z,9Z,12Z,15Z)/22:2(13Z,16Z));PC(18:1(11Z)/22:5(4Z,7Z,10Z,13Z,16Z));PC(20:3(8Z,11Z,14Z)/20:3(8Z,11Z,14Z));PC(22:4(7Z,10Z,13Z,16Z)/18:2(9Z,12Z));PC(22:5(7Z,10Z,13Z,16Z,…	-1.74569508785345;-1.74569508785345;-1.74569508785345;-1.74569508785345;-1.74569508785345;-1.74569508785345;-1.74569508785345;-1.74569508785345;-1.74569508785345;-1.74569508785345;-1.74569508785345;-1.74569508785345;-1.74569508785345;-1.74569508785345;-1.	MS1 mz matched	856.581	136.796
4329	positive	NA	NA	NA	NA	Unmapped	856.861	352.427
4330	positive	NA	NA	PE(20:2(11Z,14Z)/22:5(7Z,10Z,13Z,16Z,19Z));PE(22:5(4Z,7Z,10Z,13Z,16Z)/20:2(11Z,14Z));PE(20:5(5Z,8Z,11Z,14Z,17Z)/22:2(13Z,16Z));PE(22:4(7Z,10Z,13Z,16Z)/20:3(5Z,8Z,11Z));PE(22:5(7Z,10Z,13Z,16Z,19Z)/20:2(11Z,14Z));PE(20:3(5Z,8Z,11Z)/22:4(7Z,10Z,13Z,16Z));PE(20:2(11Z,14Z)/22:5(4Z,7Z,10Z,13Z,16Z));PE(22:6(4Z,7Z,10Z,13Z,16Z,19Z)/20:1(11Z));PE(20:1(11Z)/22:6(4Z,7Z,10Z,13Z,16Z,19Z));PE(22:4(7Z,10Z,13Z,16…	7.57840779612236;7.57840779612236;7.57840779612236;7.57840779612236;7.57840779612236;7.57840779612236;7.57840779612236;7.57840779612236;7.57840779612236;7.57840779612236;7.57840779612236;7.57840779612236;	MS1 mz matched	857.085	236.064
4375	positive	NA	NA	NA	NA	Unmapped	868.842	352.103
4383	positive	NA	NA	NA	NA	Unmapped	870.939	352.447
4386	positive	NA	NA	PC(o-22:1(13Z)/20:4(8Z,11Z,14Z,17Z));	-2.51959269078826;	MS1 mz matched	872.65	135.363
4394	positive	NA	NA	NA	NA	Unmapped	873.903	352.438
4399	positive	NA	NA	NA	NA	Unmapped	875.059	236.061
4406	positive	NA	NA	NA	NA	Unmapped	876.558	186.403
4419	positive	SM(d18:1/24:0)	0.9235	NA	NA	MS2 forward	878.696	135.541
4428	positive	NA	NA	PC(22:5(4Z,7Z,10Z,13Z,16Z)/22:6(4Z,7Z,10Z,13Z,16Z,19Z));PC(22:6(4Z,7Z,10Z,13Z,16Z,19Z)/22:5(7Z,10Z,13Z,16Z,19Z));PC(22:6(4Z,7Z,10Z,13Z,16Z,19Z)/22:5(4Z,7Z,10Z,13Z,16Z));PC(22:5(7Z,10Z,13Z,16Z,19Z)/22:6(4Z,7Z,10Z,13Z,16Z,19Z));	12.2965837716256;12.2965837716256;12.2965837716256;12.2965837716256;	MS1 mz matched	880.589	188.249
4429	positive	NA	NA	NA	NA	Unmapped	880.825	352.36
4447	positive	NA	NA	NA	NA	Unmapped	886.875	352.443
4450	positive	NA	NA	PI(20:4(5Z,8Z,11Z,14Z)/18:0);PI(20:3(5Z,8Z,11Z)/18:1(9Z));PI(18:1(11Z)/20:3(8Z,11Z,14Z));PI(20:4(8Z,11Z,14Z,17Z)/18:0);PI(18:1(9Z)/20:3(8Z,11Z,14Z));PI(18:1(9Z)/20:3(5Z,8Z,11Z));PI(16:0/22:4(7Z,10Z,13Z,16Z));PI(18:0/20:4(8Z,11Z,14Z,17Z));PI(20:2(11Z,14Z)/18:2(9Z,12Z));PI(20:3(8Z,11Z,14Z)/18:1(9Z));PI(18:2(9Z,12Z)/20:2(11Z,14Z));PI(20:3(8Z,11Z,14Z)/18:1(11Z));PI(22:4(10Z,13Z,16Z,19Z)/16:0);PI(16:0…	-3.52972177048481;-3.52972177048481;-3.52972177048481;-3.52972177048481;-3.52972177048481;-3.52972177048481;-3.52972177048481;-3.52972177048481;-3.52972177048481;-3.52972177048481;-3.52972177048481;-3.52972177048481;-3.52972177048481;-3.52972177048481;-3.	MS1 mz matched	887.561	185.217
4455	positive	NA	NA	NA	NA	Unmapped	890.942	352.445
4457	positive	NA	NA	NA	NA	Unmapped	891.444	352.459
4468	positive	NA	NA	NA	NA	Unmapped	894.9	352.44
4485	positive	NA	NA	NA	NA	Unmapped	899.635	201.065
4497	positive	NA	NA	NA	NA	Unmapped	902.342	243.42
4498	positive	NA	NA	TG(16:1(9Z)/20:4(5Z,8Z,11Z,14Z)/20:4(5Z,8Z,11Z,14Z))[iso3];TG(18:4(6Z,9Z,12Z,15Z)/18:0/20:5(5Z,8Z,11Z,14Z,17Z));TG(16:0/22:6(4Z,7Z,10Z,13Z,16Z,19Z)/18:3(9Z,12Z,15Z));TG(16:1(9Z)/22:5(7Z,10Z,13Z,16Z,19Z)/18:3(6Z,9Z,12Z));TG(22:5(4Z,7Z,10Z,13Z,16Z)/14:0/20:4(8Z,11Z,14Z,17Z));TG(16:0/20:5(5Z,8Z,11Z,14Z,17Z)/20:4(8Z,11Z,14Z,17Z));TG(14:1(9Z)/22:5(4Z,7Z,10Z,13Z,16Z)/20:3n6);TG(18:1(11Z)/18:4(6Z,9Z,12Z…	-13.9352006539834;-13.9352006539834;-13.9352006539834;-13.9352006539834;-13.9352006539834;-13.9352006539834;-13.9352006539834;-13.9352006539834;-13.9352006539834;-13.9352006539834;-13.9352006539834;-13.9352006539834;-13.9352006539834;-13.9352006539834;-13	MS1 mz matched	902.377	31.575
4513	positive	NA	NA	PI(20:4(5Z,8Z,11Z,14Z)/18:0);PI(20:3(5Z,8Z,11Z)/18:1(9Z));PI(18:1(11Z)/20:3(8Z,11Z,14Z));PI(20:4(8Z,11Z,14Z,17Z)/18:0);PI(18:1(9Z)/20:3(8Z,11Z,14Z));PI(18:1(9Z)/20:3(5Z,8Z,11Z));PI(16:0/22:4(7Z,10Z,13Z,16Z));PI(18:0/20:4(8Z,11Z,14Z,17Z));PI(20:2(11Z,14Z)/18:2(9Z,12Z));PI(20:3(8Z,11Z,14Z)/18:1(9Z));PI(18:2(9Z,12Z)/20:2(11Z,14Z));PI(20:3(8Z,11Z,14Z)/18:1(11Z));PI(22:4(10Z,13Z,16Z,19Z)/16:0);PI(16:0…	-3.52972177048481;-3.52972177048481;-3.52972177048481;-3.52972177048481;-3.52972177048481;-3.52972177048481;-3.52972177048481;-3.52972177048481;-3.52972177048481;-3.52972177048481;-3.52972177048481;-3.52972177048481;-3.52972177048481;-3.52972177048481;-3.	MS1 mz matched	904.589	185.208
4530	positive	NA	NA	NA	NA	Unmapped	909.844	352.287
4550	positive	NA	NA	NA	NA	Unmapped	916.661	201.081
4551	positive	NA	NA	NA	NA	Unmapped	916.883	352.449
4561	positive	NA	NA	PGP(18:0/20:3(8Z,11Z,14Z));PGP(18:0/20:3(5Z,8Z,11Z));	-10.8959464355019;-10.8959464355019;	MS1 mz matched	920.007	235.469
4566	positive	NA	NA	NA	NA	Unmapped	921.615	201.475
4575	positive	NA	NA	NA	NA	Unmapped	924.32	243.28
4582	positive	NA	NA	NA	NA	Unmapped	926.268	30.955
4605	positive	NA	NA	NA	NA	Unmapped	931.944	352.461
4610	positive	NA	NA	3-Hydroxy-3-methylglutaryl-CoA;(3S)-3-Hydroxyadipyl-CoA;	0;0;	MS1 mz matched	934.64	31.5795
4622	positive	NA	NA	NA	NA	Unmapped	939.86	352.442
4630	positive	NA	NA	TG(15:0/22:5(4Z,7Z,10Z,13Z,16Z)/22:5(7Z,10Z,13Z,16Z,19Z));TG(20:2n6/22:5(7Z,10Z,13Z,16Z,19Z)/18:3(9Z,12Z,15Z));TG(20:2n6/22:4(7Z,10Z,13Z,16Z)/18:4(6Z,9Z,12Z,15Z));TG(20:2n6/18:3(9Z,12Z,15Z)/22:5(4Z,7Z,10Z,13Z,16Z));TG(20:4(8Z,11Z,14Z,17Z)/18:2(9Z,12Z)/20:4(8Z,11Z,14Z,17Z));TG(20:3(5Z,8Z,11Z)/20:5(5Z,8Z,11Z,14Z,17Z)/18:2(9Z,12Z));TG(20:4(5Z,8Z,11Z,14Z)/20:2n6/20:4(8Z,11Z,14Z,17Z));TG(20:2n6/18:4(6…	14.0816310179055;14.0816310179055;14.0816310179055;14.0816310179055;14.0816310179055;14.0816310179055;14.0816310179055;14.0816310179055;14.0816310179055;14.0816310179055;14.0816310179055;14.0816310179055;14.0816310179055;14.0816310179055;14.0816310179055;14.0816310179055;14.0816310179055;14.0816310179055;14.0816310179055;14.0816310179055;14.0816310179055;14.0816310179055;14.0816310179055;14.08163…	MS1 mz matched	942.467	317.527
4641	positive	NA	NA	NA	NA	Unmapped	948.65	244.143
4643	positive	NA	NA	Diguanosine pentaphosphate;	-21.9972529706502;	MS1 mz matched	948.984	352.457
4650	positive	NA	NA	Torososide B;	-22.4050382821671;	MS1 mz matched	950.846	352.377
4657	positive	NA	NA	OP-1118;	13.1585739750065;	MS1 mz matched	952.943	352.437
4658	positive	NA	NA	NA	NA	Unmapped	953.606	244.163
4671	positive	NA	NA	NA	NA	Unmapped	956.902	352.438
4687	positive	NA	NA	NA	NA	Unmapped	962.831	352.377
4703	positive	NA	NA	NA	NA	Unmapped	968.881	352.443
4705	positive	NA	NA	NA	NA	Unmapped	969.573	244.132
4712	positive	NA	NA	NA	NA	Unmapped	972.945	352.449
4723	positive	NA	NA	NA	NA	Unmapped	976.904	352.438
4754	positive	NA	NA	TG(20:0/22:5(4Z,7Z,10Z,13Z,16Z)/20:3(5Z,8Z,11Z));TG(24:1(15Z)/20:3n6/18:4(6Z,9Z,12Z,15Z));TG(22:2(13Z,16Z)/18:1(9Z)/22:5(4Z,7Z,10Z,13Z,16Z));TG(20:3(5Z,8Z,11Z)/22:2(13Z,16Z)/20:3n6);TG(20:4(5Z,8Z,11Z,14Z)/24:1(15Z)/18:3(9Z,12Z,15Z));TG(22:0/18:3(6Z,9Z,12Z)/22:5(4Z,7Z,10Z,13Z,16Z));TG(22:0/20:3n6/20:5(5Z,8Z,11Z,14Z,17Z));TG(18:4(6Z,9Z,12Z,15Z)/24:0/20:4(8Z,11Z,14Z,17Z));TG(20:1(11Z)/22:4(7Z,10Z,13…	-22.182431744518;-22.182431744518;-22.182431744518;-22.182431744518;-22.182431744518;-22.182431744518;-22.182431744518;-22.182431744518;-22.182431744518;-22.182431744518;-22.182431744518;-22.182431744518;-22.182431744518;-22.182431744518;-22.182431744518;	MS1 mz matched	987.808	146.394
4759	positive	NA	NA	NA	NA	Unmapped	989.654	190.686
4767	positive	NA	NA	NA	NA	Unmapped	991.553	244.006
4768	positive	LysoPC(16:0)	0.9495	NA	NA	MS2 reverse	991.672	190.074
4770	positive	NA	NA	NA	NA	Unmapped	991.849	352.443
4782	positive	NA	NA	NA	NA	Unmapped	996.906	352.443
4783	positive	NA	NA	NA	NA	Unmapped	997.408	352.451
4791	positive	NA	NA	NA	NA	Unmapped	1000.29	30.961
4792	positive	NA	NA	NA	NA	Unmapped	1000.87	352.436
4811	positive	NA	NA	NA	NA	Unmapped	1008.89	352.447
4813	positive	NA	NA	NA	NA	Unmapped	1009.39	352.45
4828	positive	NA	NA	NA	NA	Unmapped	1015.67	189.468
4844	positive	NA	NA	NA	NA	Unmapped	1021.86	352.445
4851	positive	NA	NA	NA	NA	Unmapped	1024.83	352.413
4865	positive	NA	NA	NA	NA	Unmapped	1032.85	352.438
4873	positive	NA	NA	Diadenosine hexaphosphate;P1,P6-Bis(5'-adenosyl)hexaphosphate	3.08680610344767;3.11250948689643	MS1 mz matched	1034.95	352.443
4877	positive	NA	NA	Pelargonidin 3-O-[b-D-Glucopyranosyl-(1-&gt;2)-[4-hydroxy-3-methoxy-(E)-cinnamoyl-(-&gt;6)]-b-D-glucopyranoside] 5-O-(6-O-malonyl-b-D-glucopyranoside);	-11.2758197888239;	MS1 mz matched	1037.91	352.446
4882	positive	NA	NA	Heparin;	19.2335432994969;	MS1 mz matched	1040.88	352.447
4894	positive	NA	NA	NA	NA	Unmapped	1044.83	352.441
4897	positive	NA	NA	TG(22:2(13Z,16Z)/20:0/22:2(13Z,16Z));TG(20:0/24:0/20:4(8Z,11Z,14Z,17Z));TG(24:0/18:3(6Z,9Z,12Z)/22:1(13Z));TG(20:0/22:0/22:4(7Z,10Z,13Z,16Z));TG(22:0/24:0/18:4(6Z,9Z,12Z,15Z));TG(20:3(5Z,8Z,11Z)/22:0/22:1(13Z));TG(18:1(11Z)/24:1(15Z)/22:2(13Z,16Z));TG(24:1(15Z)/18:1(9Z)/22:2(13Z,16Z));TG(22:0/24:1(15Z)/18:3(9Z,12Z,15Z));TG(22:0/20:3n6/22:1(13Z));TG(18:1(9Z)/24:1(15Z)/22:2(13Z,16Z));TG(22:0/22:1(1…	-11.7223903517472;-11.7223903517472;-11.7223903517472;-11.7223903517472;-11.7223903517472;-11.7223903517472;-11.7223903517472;-11.7223903517472;-11.7223903517472;-11.7223903517472;-11.7223903517472;-11.7223903517472;-11.7223903517472;-11.7223903517472;-11	MS1 mz matched	1046.66	240.304
4911	positive	NA	NA	NA	NA	Unmapped	1050.88	352.445
4919	positive	NA	NA	NA	NA	Unmapped	1054.95	352.448
4931	positive	NA	NA	3-Oxo-OPC8-CoA;	-22.0351231603465;	MS1 mz matched	1058.91	352.445
4939	positive	NA	NA	Heparin;	19.2335432994969;	MS1 mz matched	1062.87	352.447
4950	positive	NA	NA	NA	NA	Unmapped	1067.7	186.399
4965	positive	NA	NA	NA	NA	Unmapped	1074.31	30.731
4976	positive	NA	NA	YGM 1A;	15.531573795409;	MS1 mz matched	1078.91	352.452
4977	positive	NA	NA	NA	NA	Unmapped	1079.41	352.452
4983	positive	NA	NA	NA	NA	Unmapped	1082.87	352.447
5003	positive	NA	NA	TG(22:0/22:2(13Z,16Z)/20:1(11Z));TG(22:0/20:3(5Z,8Z,11Z)/22:0);TG(24:1(15Z)/18:0/22:2(13Z,16Z));TG(24:0/20:0/20:3n6);TG(18:1(9Z)/22:1(13Z)/24:1(15Z));TG(24:0/18:1(9Z)/22:2(13Z,16Z));TG(22:1(13Z)/20:0/22:2(13Z,16Z));TG(22:0/20:3n6/22:0);TG(18:1(11Z)/22:1(13Z)/24:1(15Z));TG(22:0/18:3(9Z,12Z,15Z)/24:0);TG(20:0/20:3(5Z,8Z,11Z)/24:0);TG(20:0/24:0/20:3(5Z,8Z,11Z));TG(22:0/24:0/18:3(6Z,9Z,12Z));TG(24:0/…	-9.55373191309752;-9.55373191309752;-9.55373191309752;-9.55373191309752;-9.55373191309752;-9.55373191309752;-9.55373191309752;-9.55373191309752;-9.55373191309752;-9.55373191309752;-9.55373191309752;-9.55373191309752;-9.55373191309752;-9.55373191309752;-9.	MS1 mz matched	1091.89	352.445
5043	positive	NA	NA	NA	NA	Unmapped	1115.85	352.43
5062	positive	NA	NA	NA	NA	Unmapped	1126.84	352.437
5069	positive	NA	NA	NA	NA	Unmapped	1130.67	244.393
5083	positive	NA	NA	NA	NA	Unmapped	1136.95	352.455
5087	positive	NA	NA	NA	NA	Unmapped	1138.81	351.919
5100	positive	NA	NA	NA	NA	Unmapped	1144.87	352.45
5103	positive	NA	NA	Congmunoside XIV;	-0.700898774371649;	MS1 mz matched	1146.33	30.293
5118	positive	NA	NA	Trihexosylceramide (d18:1/25:0);	-9.92858467153524;	MS1 mz matched	1150.8	352.403
5124	positive	NA	NA	Ganglioside GM3 (d18:1/16:0);	-2.73962345104496;	MS1 mz matched	1153.72	249.375
5138	positive	NA	NA	TG(24:1(15Z)/24:1(15Z)/24:1(15Z));	8.34863550350965;	MS1 mz matched	1160.91	352.449
5143	positive	NA	NA	NA	NA	Unmapped	1164.87	352.439
5149	positive	NA	NA	NA	NA	Unmapped	1167.84	352.377
5154	positive	NA	NA	NA	NA	Unmapped	1170.88	177.565
5174	positive	NA	NA	NA	NA	Unmapped	1184.88	352.447
5194	positive	NA	NA	NA	NA	Unmapped	1194.82	30.724
5202	positive	NA	NA	NA	NA	Unmapped	1196.86	352.447
5203	positive	NA	NA	NA	NA	Unmapped	1196.89	176.043
5209	positive	NA	NA	NA	NA	Unmapped	1198.9	175.854
